# Supplementary material for: Background selection and biased gene conversion affect more than 95% of the human genome and bias demographic inferences
Source: eLife. 2018 Aug 23;7:e36317. doi: 10.7554/eLife.36317 (PMC6177262; doi:10.7554/eLife.36317)
Supplement: Supplementary file 1. [file elife-36317-supp1.xlsx]

## Sheet: Table S1
Dataset	Region	Population	Individuals
1000G
	Africa	LWK	NA19023, NA19024, NA19041, NA19307, NA19308, NA19378, NA19440, NA19443, NA19454, NA19463
	(AFR)	YRI	NA18489, NA18499, NA18504, NA18519, NA18867, NA18868, NA18912, NA19102, NA19152, NA19213
	Europea	GBR	HG00100, HG00118, HG00133, HG00139, HG00141, HG00236, HG00250, HG00251, HG00256, HG00259
	(EUR)	IBS	HG01697, HG01699, HG01756, HG01757, HG01761, HG01762, HG01770, HG01771, HG01777, HG01784,
	South Asia	BEB	HG03007, HG03615, HG03616, HG03793, HG03796, HG03800, HG03802, HG03803, HG03814, HG03815
	(SAS)	PJL	HG02490, HG02491, HG02601, HG02603, HG02661, HG02687, HG02688, HG02697, HG02725, HG02733
	East Asia	JPT	NA18939, NA18959, NA18960, NA18983, NA18986, NA18988, NA19000, NA19066, NA19068, NA19072,
	(EAS)	KHV	HG01872, HG01873, HG01878, HG02025, HG02026, HG02057, HG02070, HG02075, HG02513, HG02522
	America	PEL	HG01953, HG01967, HG01968, HG01971, HG01973, HG01976, HG01979, HG01980, HG01991, HG01992
	(AMR)	CLM	HG01122, HG01124, HG01125, HG01133, HG01136, HG01140, HG01149, HG01362, HG01464, HG01486
SGDP
	Africa	Ju_hoan_North	S_Ju_hoan_North-1, S_Ju_hoan_North-3
		Yoruba	S_Yoruba-1, S_Yoruba-2
	West Eurasia	England	S_English-1, S_English-2
		Sardinia	S_Sardinian-1, S_Sardinian-2
	East Asia	Han	S_Han-1, S_Han-2
		Japan	S_Japanese-1, S_Japanese-2
	Oceania	Australia	S_Australian-1, S_Australian-5
		Papua	S_Papuan-4, S_Papuan-5
	America	Karitiana	S_Karitiana-1, S_Karitiana-2
		Quechua	S_Quechua-1, S_Quechua-2
