# Supplementary material for: Background selection and biased gene conversion affect more than 95% of the human genome and bias demographic inferences
Source: eLife. 2018 Aug 23;7:e36317. doi: 10.7554/eLife.36317 (PMC6177262; doi:10.7554/eLife.36317)
Supplement: Supplementary file 2. [file elife-36317-supp2.xlsx]

## Sheet: Table S2
			Data sets
			1000G		SGDP
Number of populations			10	10
Number of individuals			100	20
Total no. of SNPs on autosomes			22,261,142	42,526,536
No. of polymorphic SNPs			20,492,291	12,057,931
No. of non-CpG SNPs			17,431,843	10,410,986
No. of SNPs with information on recombination rate (RR) from YRI 1000G map			17,129,351	10,200,710
	WS sites		7,306,739	4,390,417
	SW sites		6,720,204	3,959,920
	WW or SS sites		3,102,408	1,850,373
No. of SNPs with information on RR from CEU map			16,990,672	10,007,089
No. of SNPs with information on RR from JPT map			16,810,834	10,119,167
No. of SNPs with information on RR from deCode map			9,145,988
No. of exonic SNPs
	Synonymous SNPs		51,458	29,101
	Non-synonymous SNPs		66,969	26,958
No. of TR SNPs with RR information			7,412,148	4,341,756
No. of NTR SNPs with RR information
	Total		9,717,203	5,858,954
	-50 Kb		6,208,050	3,730,104
No. of SNPs with GERP RS scores
	[-2;2[		11,851,791	7,063,746
	[2;4[		1,183,961	673,564
	≥4		207,552	107,592
No. of SNPs with RR ≥ 1.5 cM/Mb
	All		2,718,584	1,657,342
	In NTR regions		1,576,749	964,953
	WW or SS		493,369	300,129
	WW or SS in NTR regions		152,497	173,434
No. of SNPs with B-stat estimates and RR information			17,062,396	10,158,209
