# Supplementary material for: Background selection and biased gene conversion affect more than 95% of the human genome and bias demographic inferences
Source: eLife. 2018 Aug 23;7:e36317. doi: 10.7554/eLife.36317 (PMC6177262; doi:10.7554/eLife.36317)
Supplement: Supplementary file 3. [file elife-36317-supp3.xlsx]

## Sheet: Table S3
	NCUR	NBOT1	NPREV	NBOT2	NPAST	NBOT3	TBot1	TADM	pADM	TBot2	TBot3	TDiv
Yoruba
Neutral	11197	523	17528	55	10847	1305	15080	5220	0.087	385207	755334	373549
Q0.5%	6701	517	13069	50	9005	173	2991	899	0.062	371649	730106	315766
Q99.5%	381889	951	17969	84	18593	4885	25305	18019	0.099	506818	990676	501940
NTR-50kb	7309	517	32408	1817	6372	52	32074	5568	0.058	212628	393182	349044
Q0.5%	5296	381	26389	729	4899	46	22778	1678	0.048	198053	366301	313967
Q99.5%	8714	593	58686	5263	8631	58	48795	8505	0.072	236515	430925	401805
Synonymous	26864	687	16178	172	3735	2615	23171	23461	0.041	307661	592151	368764
Q0.5%	13134	323	12204	89	3344	237	12977	4490	0.025	293472	563839	332463
Q99.5%	442069	861	43909	3236	5745	5061	37192	25916	0.097	381622	739502	446524
Japan
Neutral	5431	202	34751	318	8122	3540	23084	4205	0.059	251575	480066	88305
Q0.5%	3771	156	19878	142	5116	198	9366	1680	0.0558	151151	286835	26381
Q99.5%	18511	250	61564	4094	38879	4650	24989	17454	0.1128	276351	536352	190297
NTR-50kb	9654	159	34846	93	38414	190	11310	8642	0.068	246355	481400	212773
Q0.5%	6595	146	19159	65	10908	141	3801	2359	0.0646	215963	426488	42241
Q99.5%	147480	189	54391	150	57773	4714	15715	13086	0.1169	299860	587126	231948
Synonymous	18602	577	6816	2444	14905	3672	18995	9628	0.072	293538	568081	165648
Q0.5%	7257	224	5026	145	8724	306	3770	565	0.0351	124182	227580	120037
Q99.5%	547262	3793	15107	4445	64663	4670	37245	23520	0.1686	670538	1327544	266887
Population size estimates (N’s) are in number of diploid individuals. Times (T’s) are in years assuming a generation time of 29 years. ML parameters estimated from the neutral datasets are shown in bold. ML parameters of the two other datasets are shown in bold underline if their 99% CI does not overlap with those of the neutral estimates, and in bold italic if their ML values are outside the 99%…
