# Supplementary material for: Background selection and biased gene conversion affect more than 95% of the human genome and bias demographic inferences
Source: eLife. 2018 Aug 23;7:e36317. doi: 10.7554/eLife.36317 (PMC6177262; doi:10.7554/eLife.36317)
Supplement: Supplementary file 4. [file elife-36317-supp4.xlsx]

## Sheet: Table S4
SNPs	Modela)	Paramb)	Estimate (SE)	Log Lhoodc)	AICd)	DAICe)
All	Const.		0.021 (8.676e–6)	803993	–1607982	5682010
	Var.		0.139 (6.290e–5)	3644999	–7289993	0
			0.695 (1.650e–4)
Ti	Const.		0.021 (1.102e–5)	509878	–1019753	3581643
	Var.		0.140 (7.946e–4)	2300701	–4601396	0
			0.695 (2.071e–4)
Tv	Const.		0.020 (1.407e–5)	294512	–589021	2100714
	Var.		0.138 (1.029e–4)	1344870	–2689735	0
			0.696 (2.728e–4)
SS+WW	Const.		0.021 (2.049e–5)	138585	–277166	1008803
	Var.		0.138 (1.481e–4)	642989	–1285969	0
			0.692 (3.908e–4)
SW	Const.		0.021 (1.429e–5)	241700	–483396	2226648
	Var.		0.142 (1.019e–4)	1355025	–2710044	0
			0.700 (2.658e–4)
WS	Const.		0.020 (1.289e–5)	425803	–851601	2447913
	Var.		0.138 (9.488e–5)	1649760	–3299514	0
			0.692 (2.496e–4)
a) Const.: model assuming that the deleterious mutation rate is independent of the recombination rate (u_d=u_0;b=0). Var.: model assuming that the deleterious mutation rate depends on the recombination rate in cM/Mb (r) as u_d=u_0 r^b. b) Model parameter. c) Log likelihood, calculated up to a positive constant as implemented in the nls function in R. d) Akaike Information Criterion (AIC). e) Diff…
