# Supplementary figures and images for: Background selection and biased gene conversion affect more than 95% of the human genome and bias demographic inferences
Source: eLife journal article supplement (doi:10.7554/elife.36317), 2018-08-20

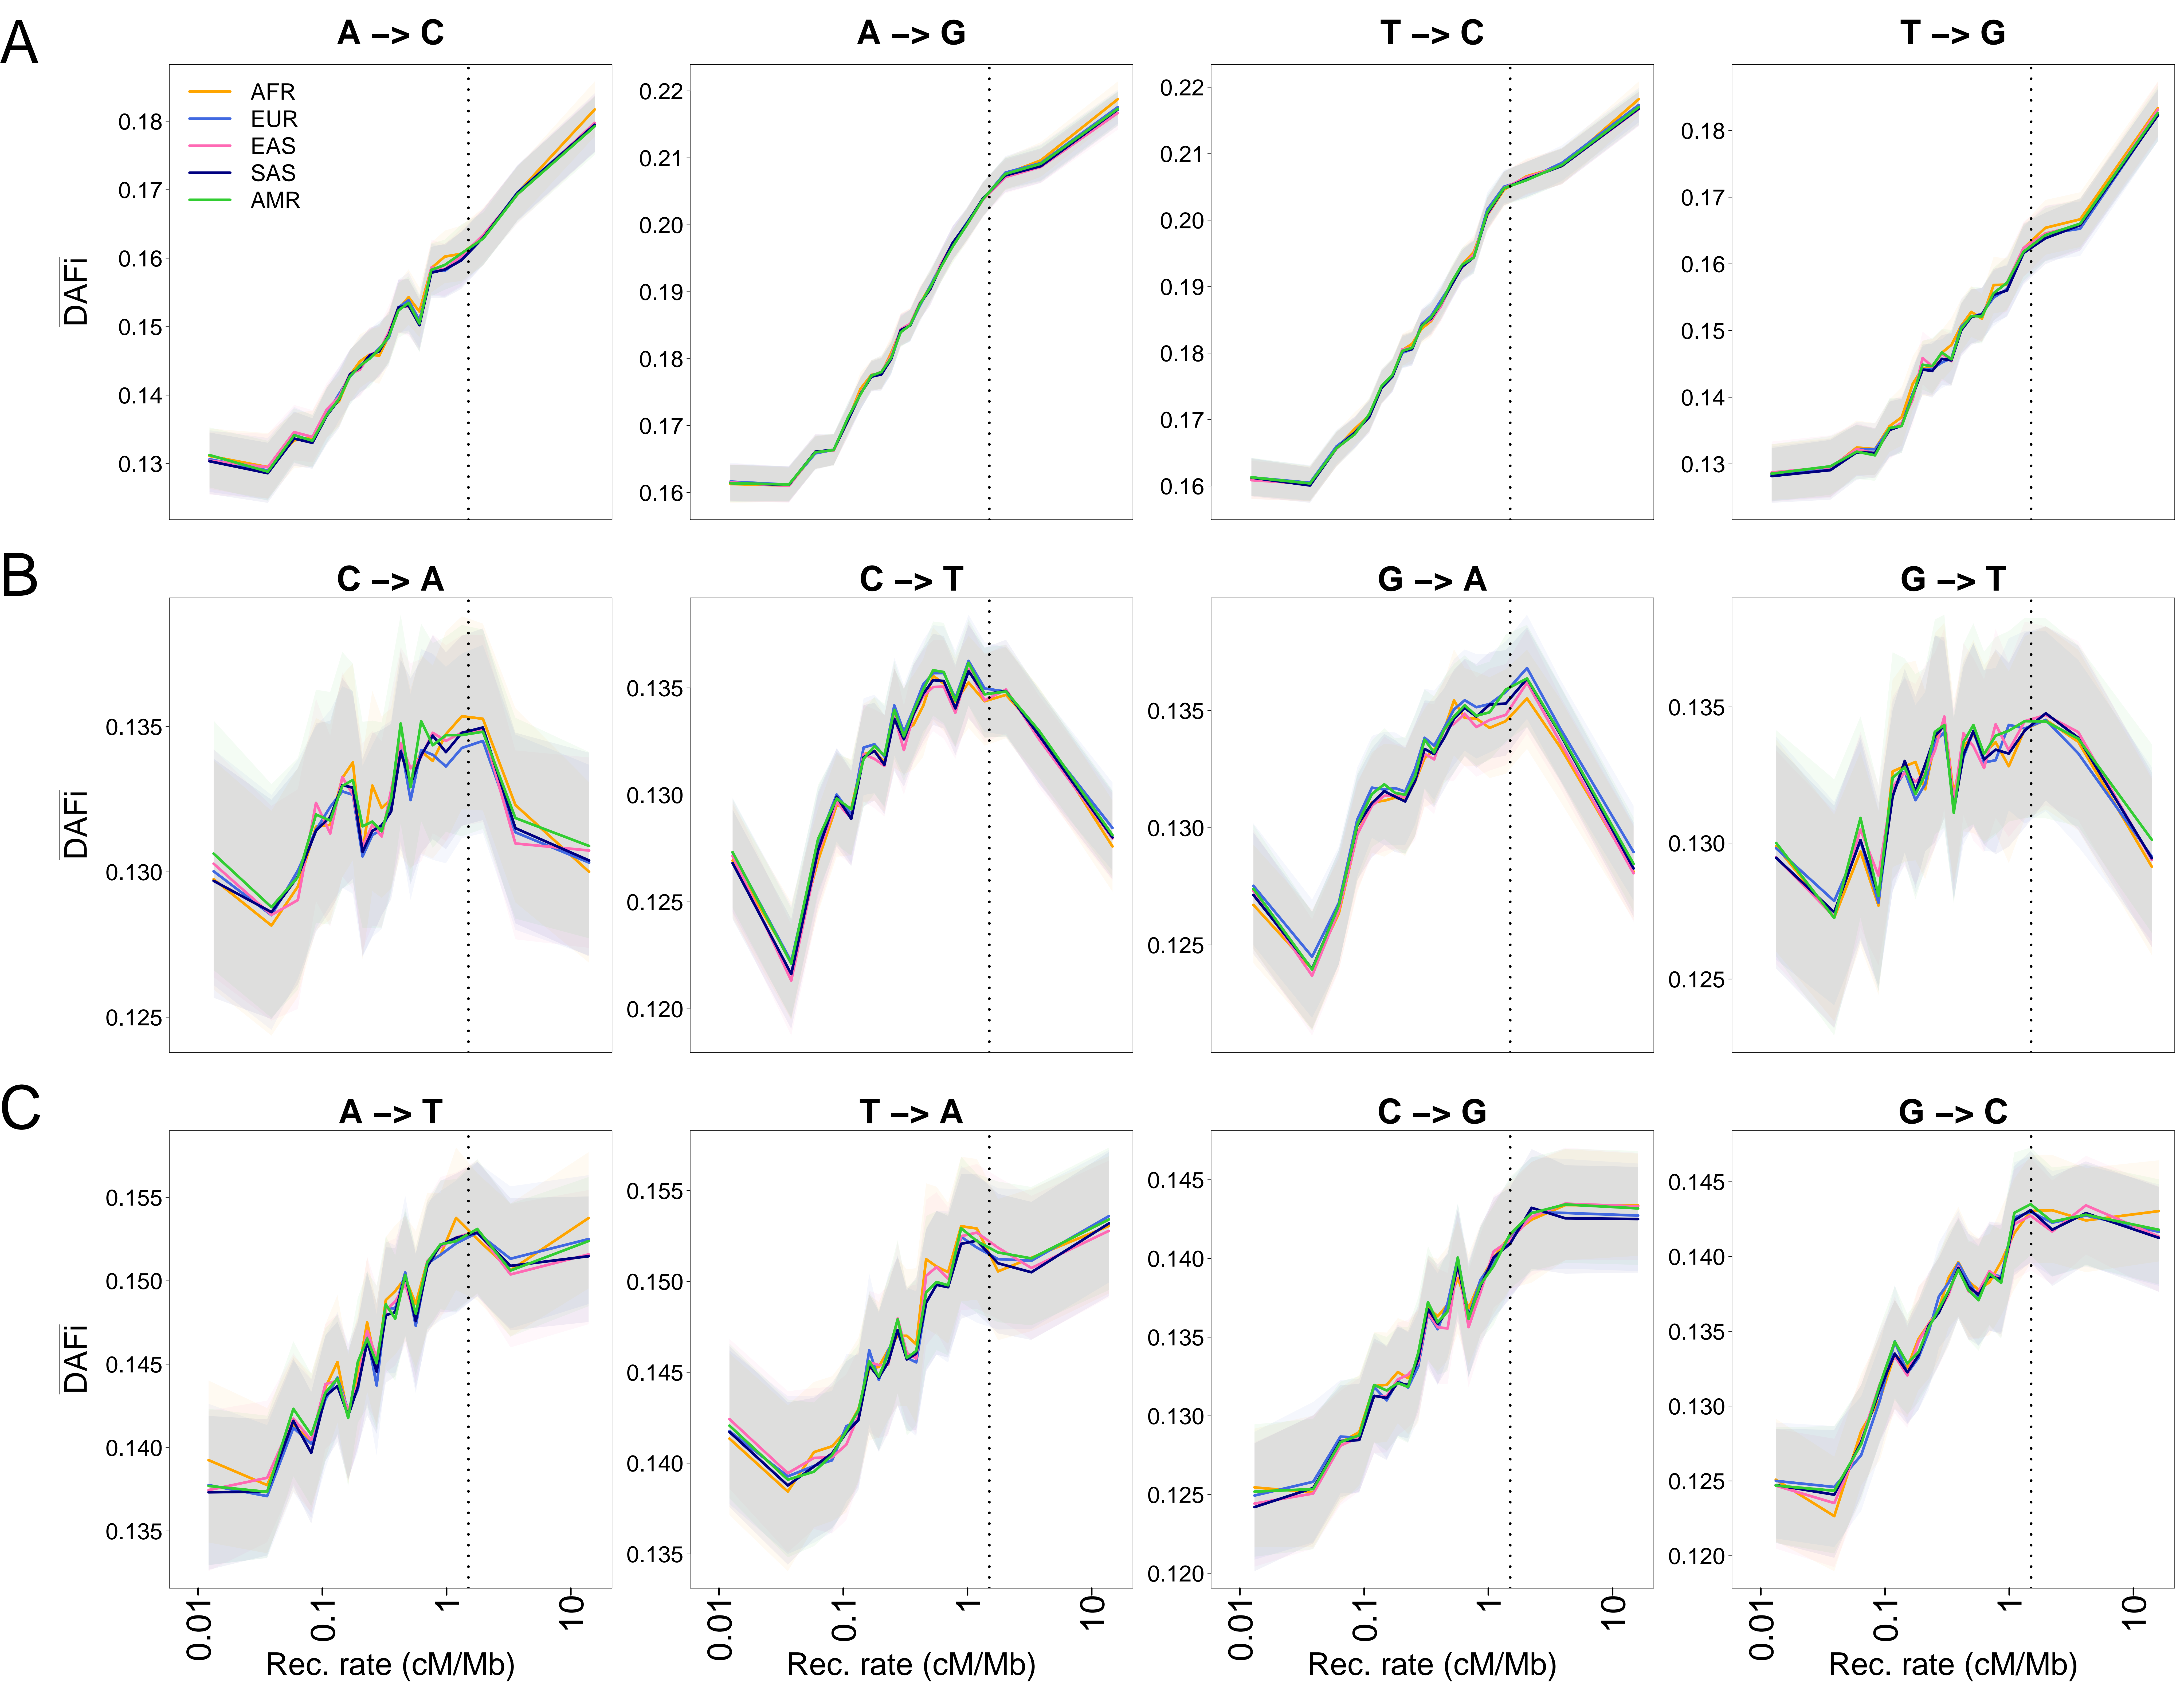

Supplement: supp [file elife-36317-supp-v2.zip]

**A****CEU recomb map.**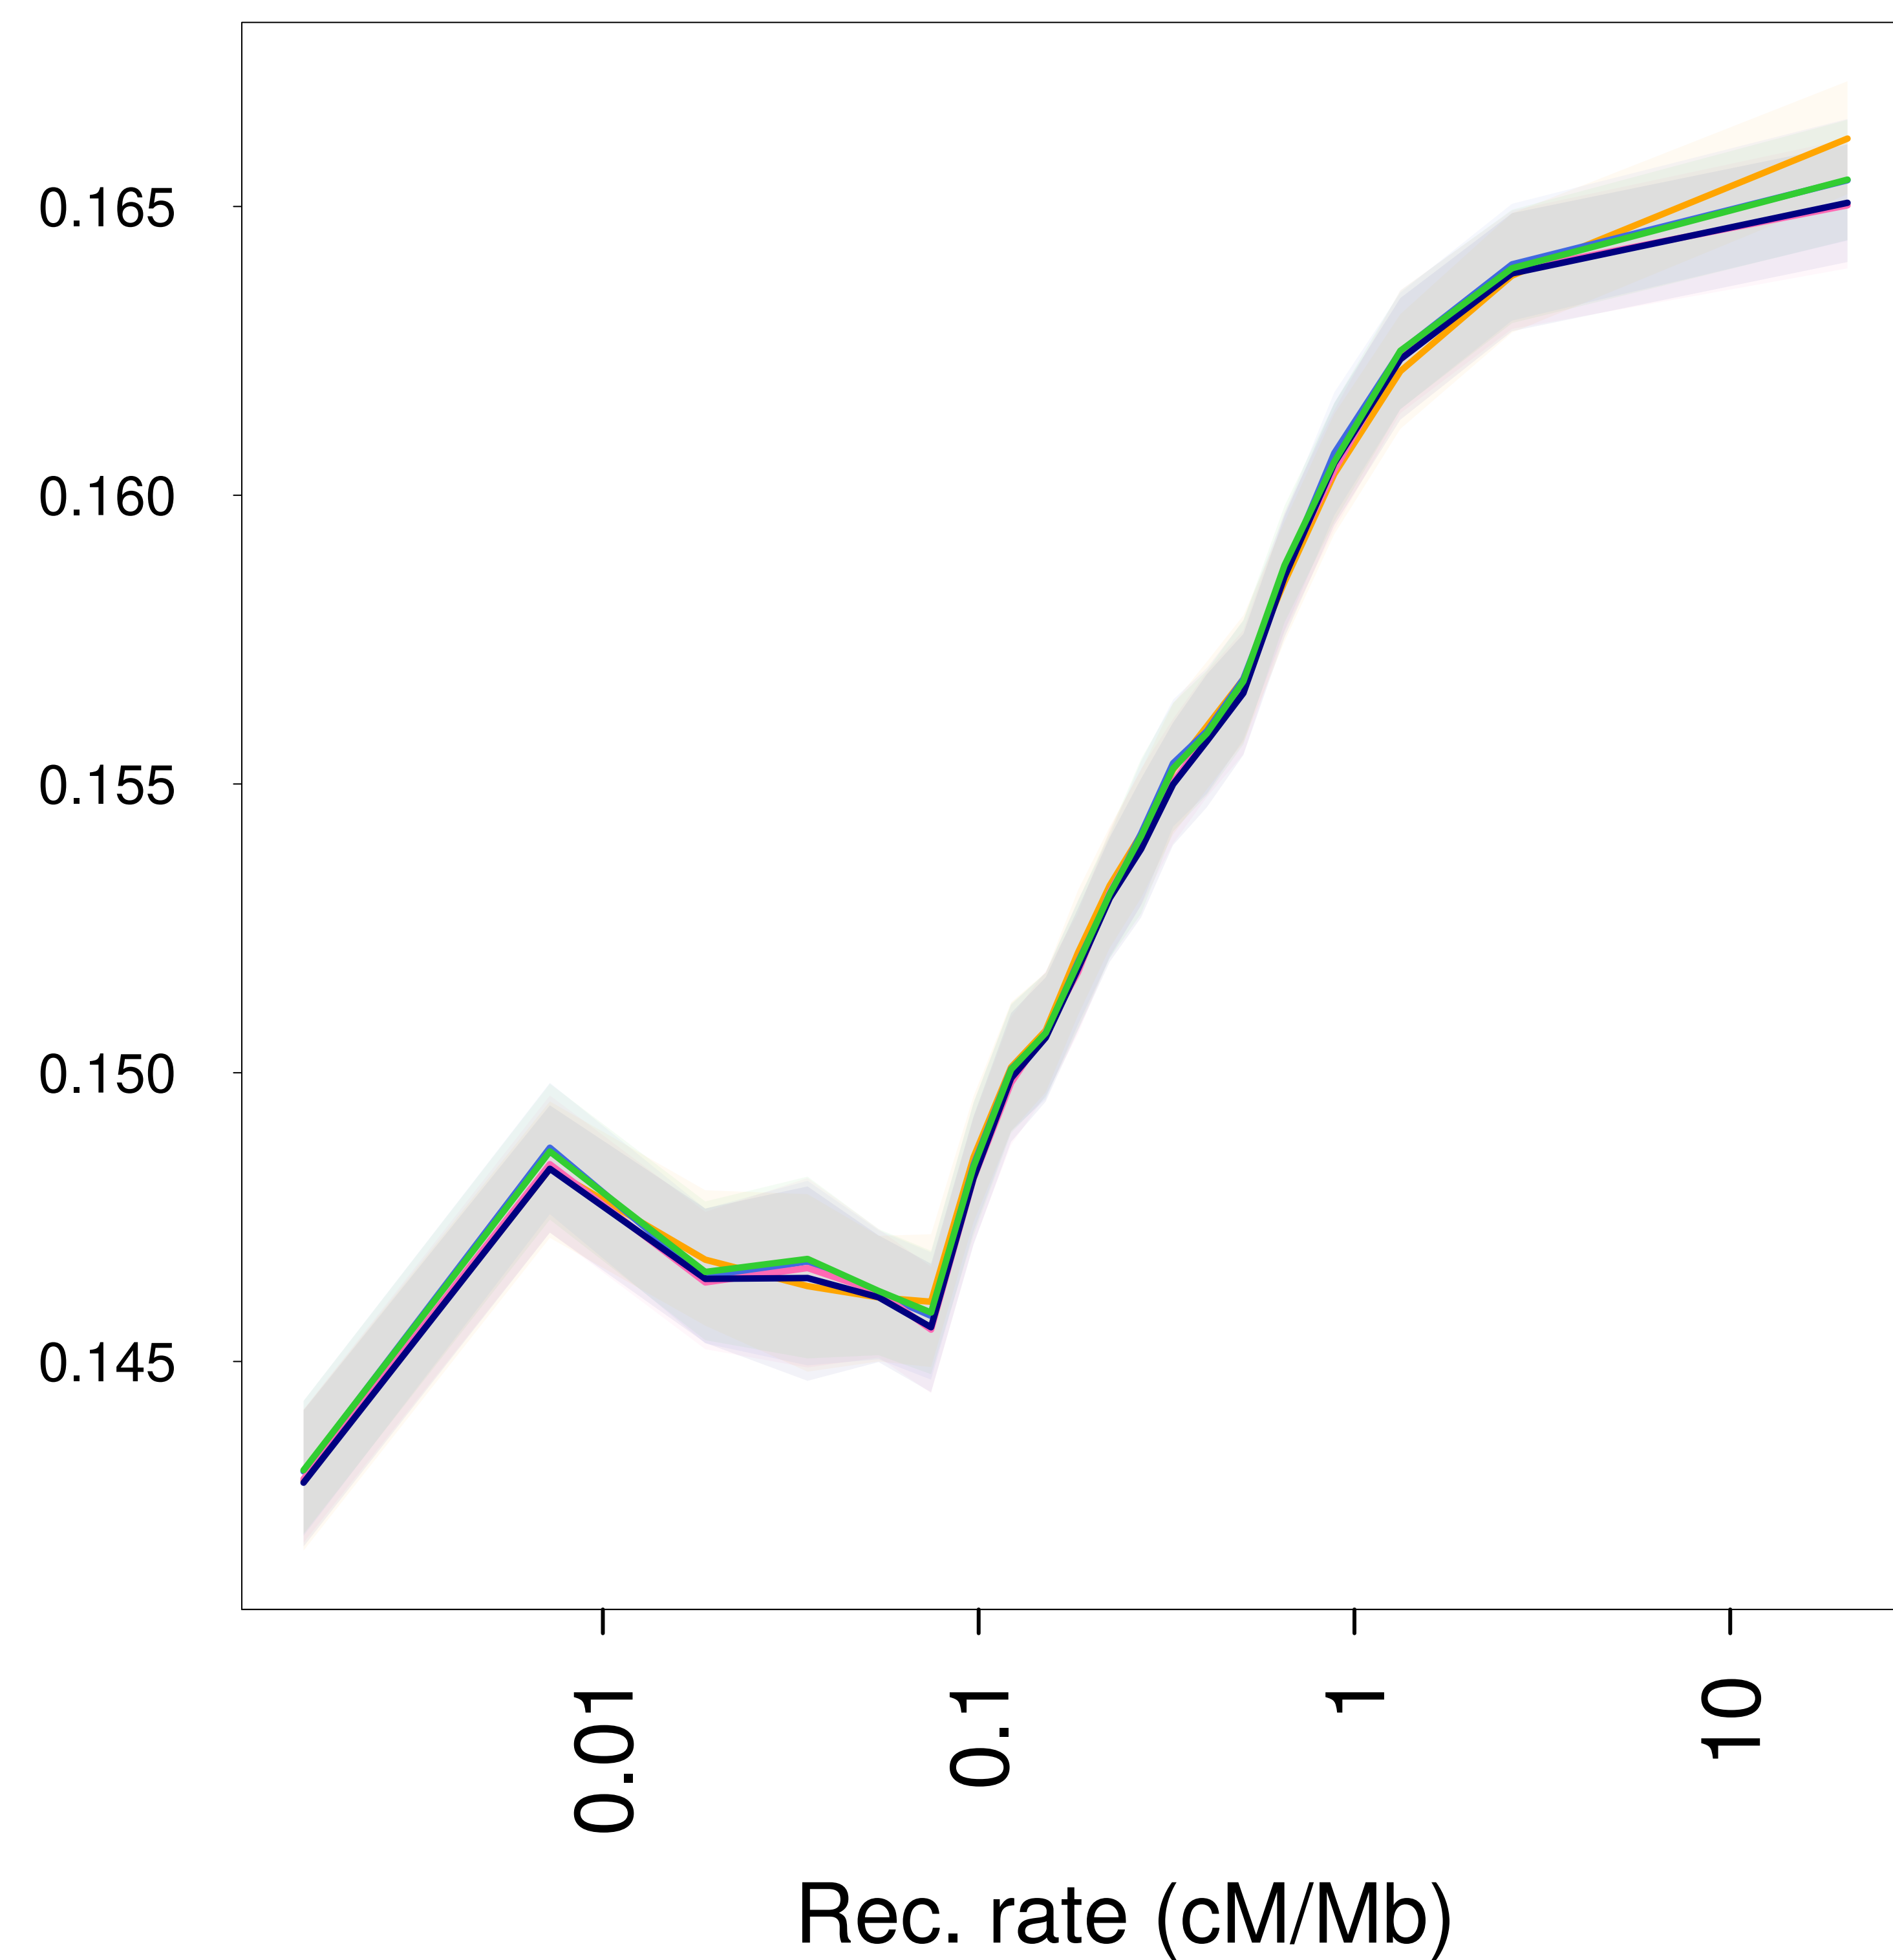**B****JPT recomb. map**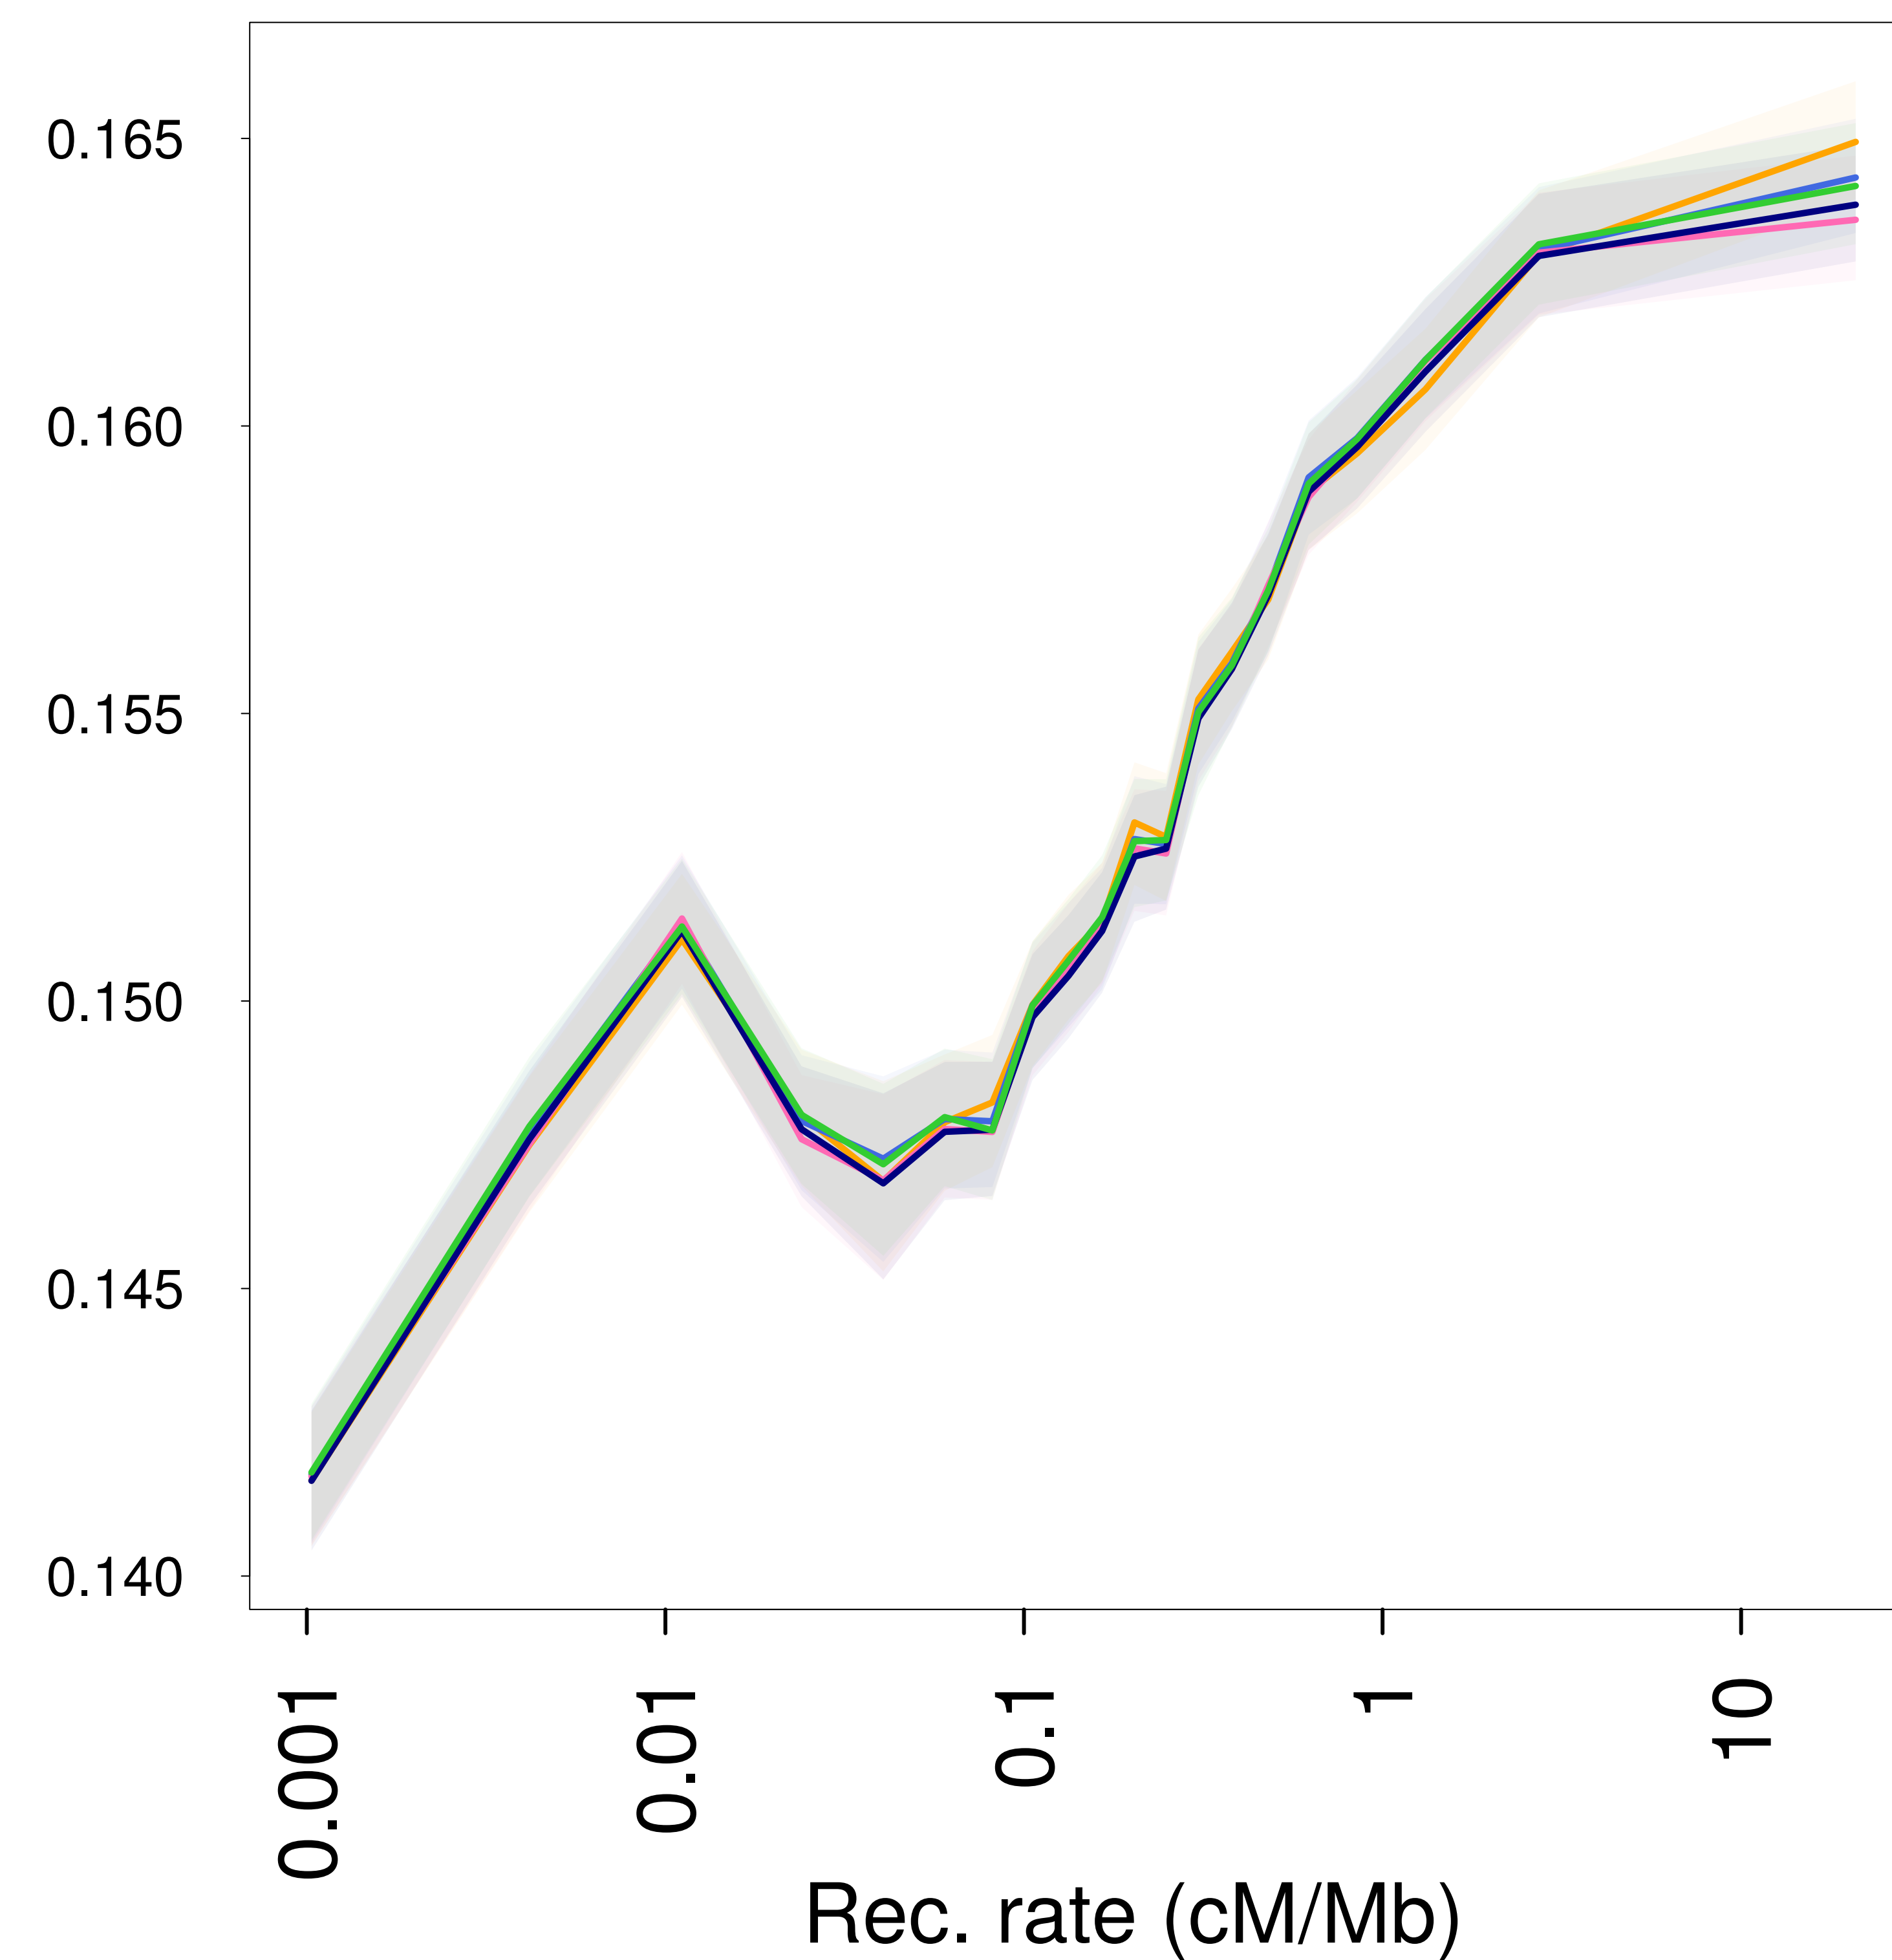**C****Decode recomb. map**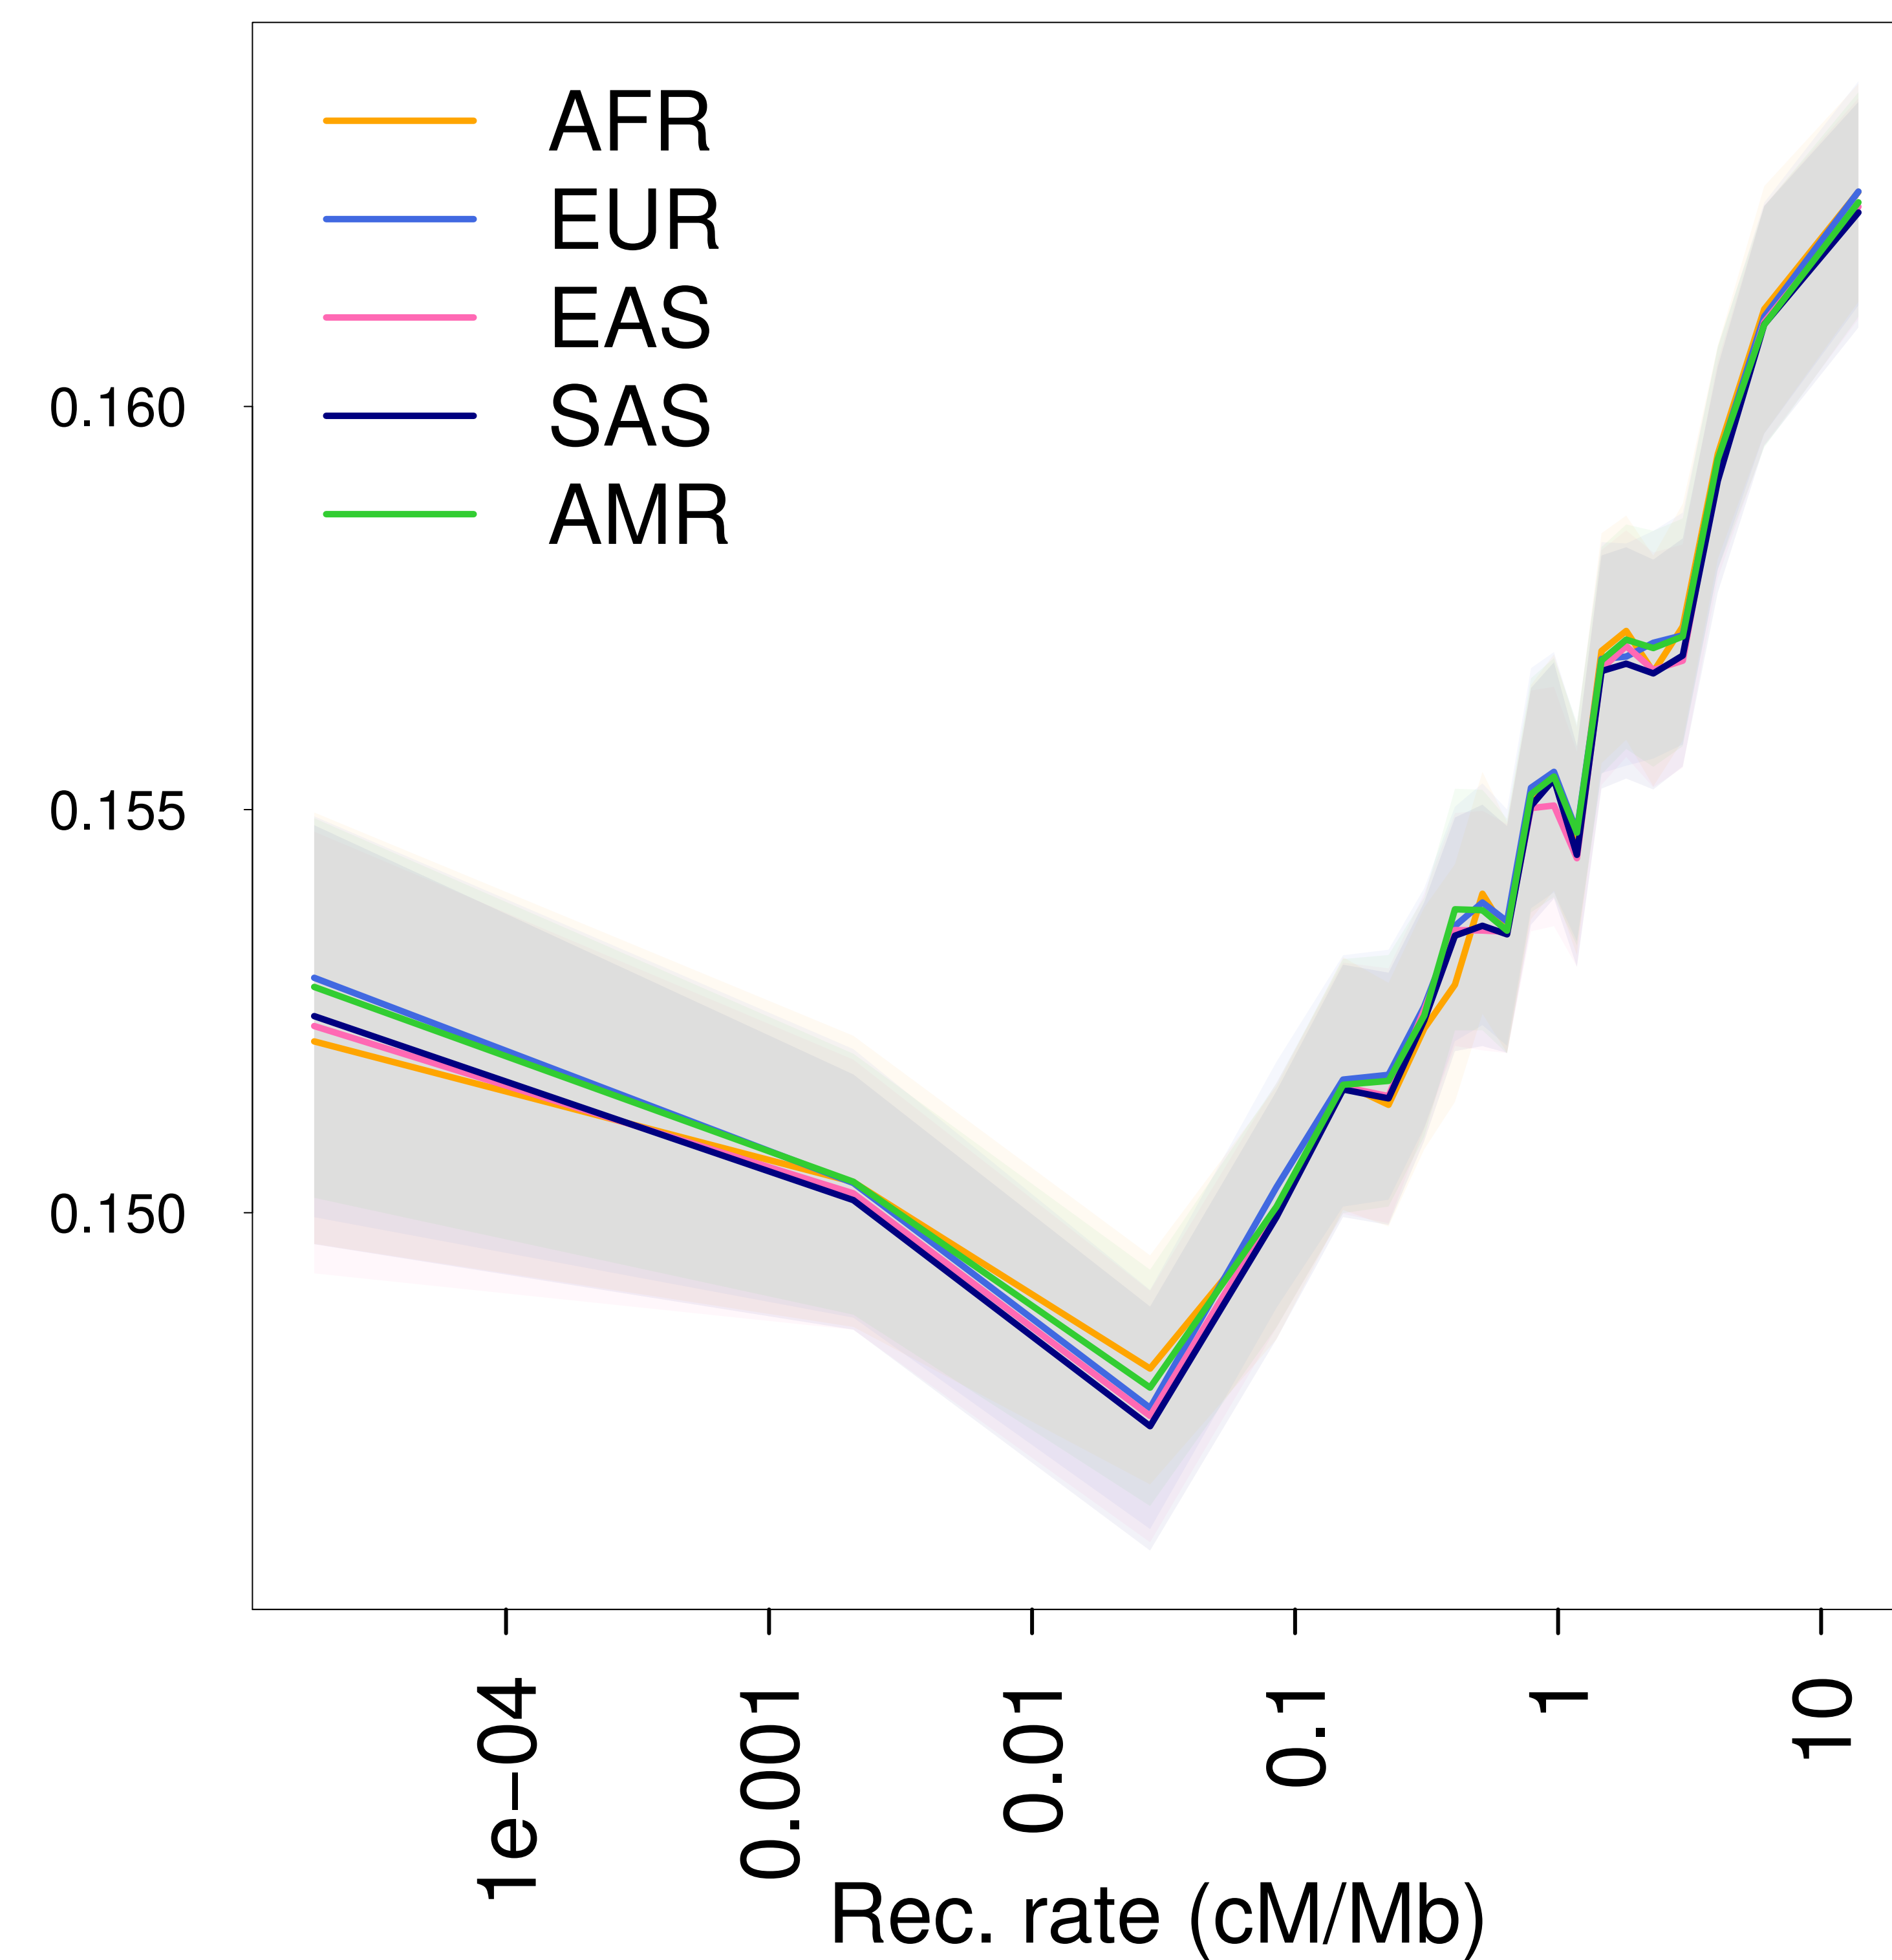

Supplement: supp [file elife-36317-supp-v2.zip]

**A****Yoruba**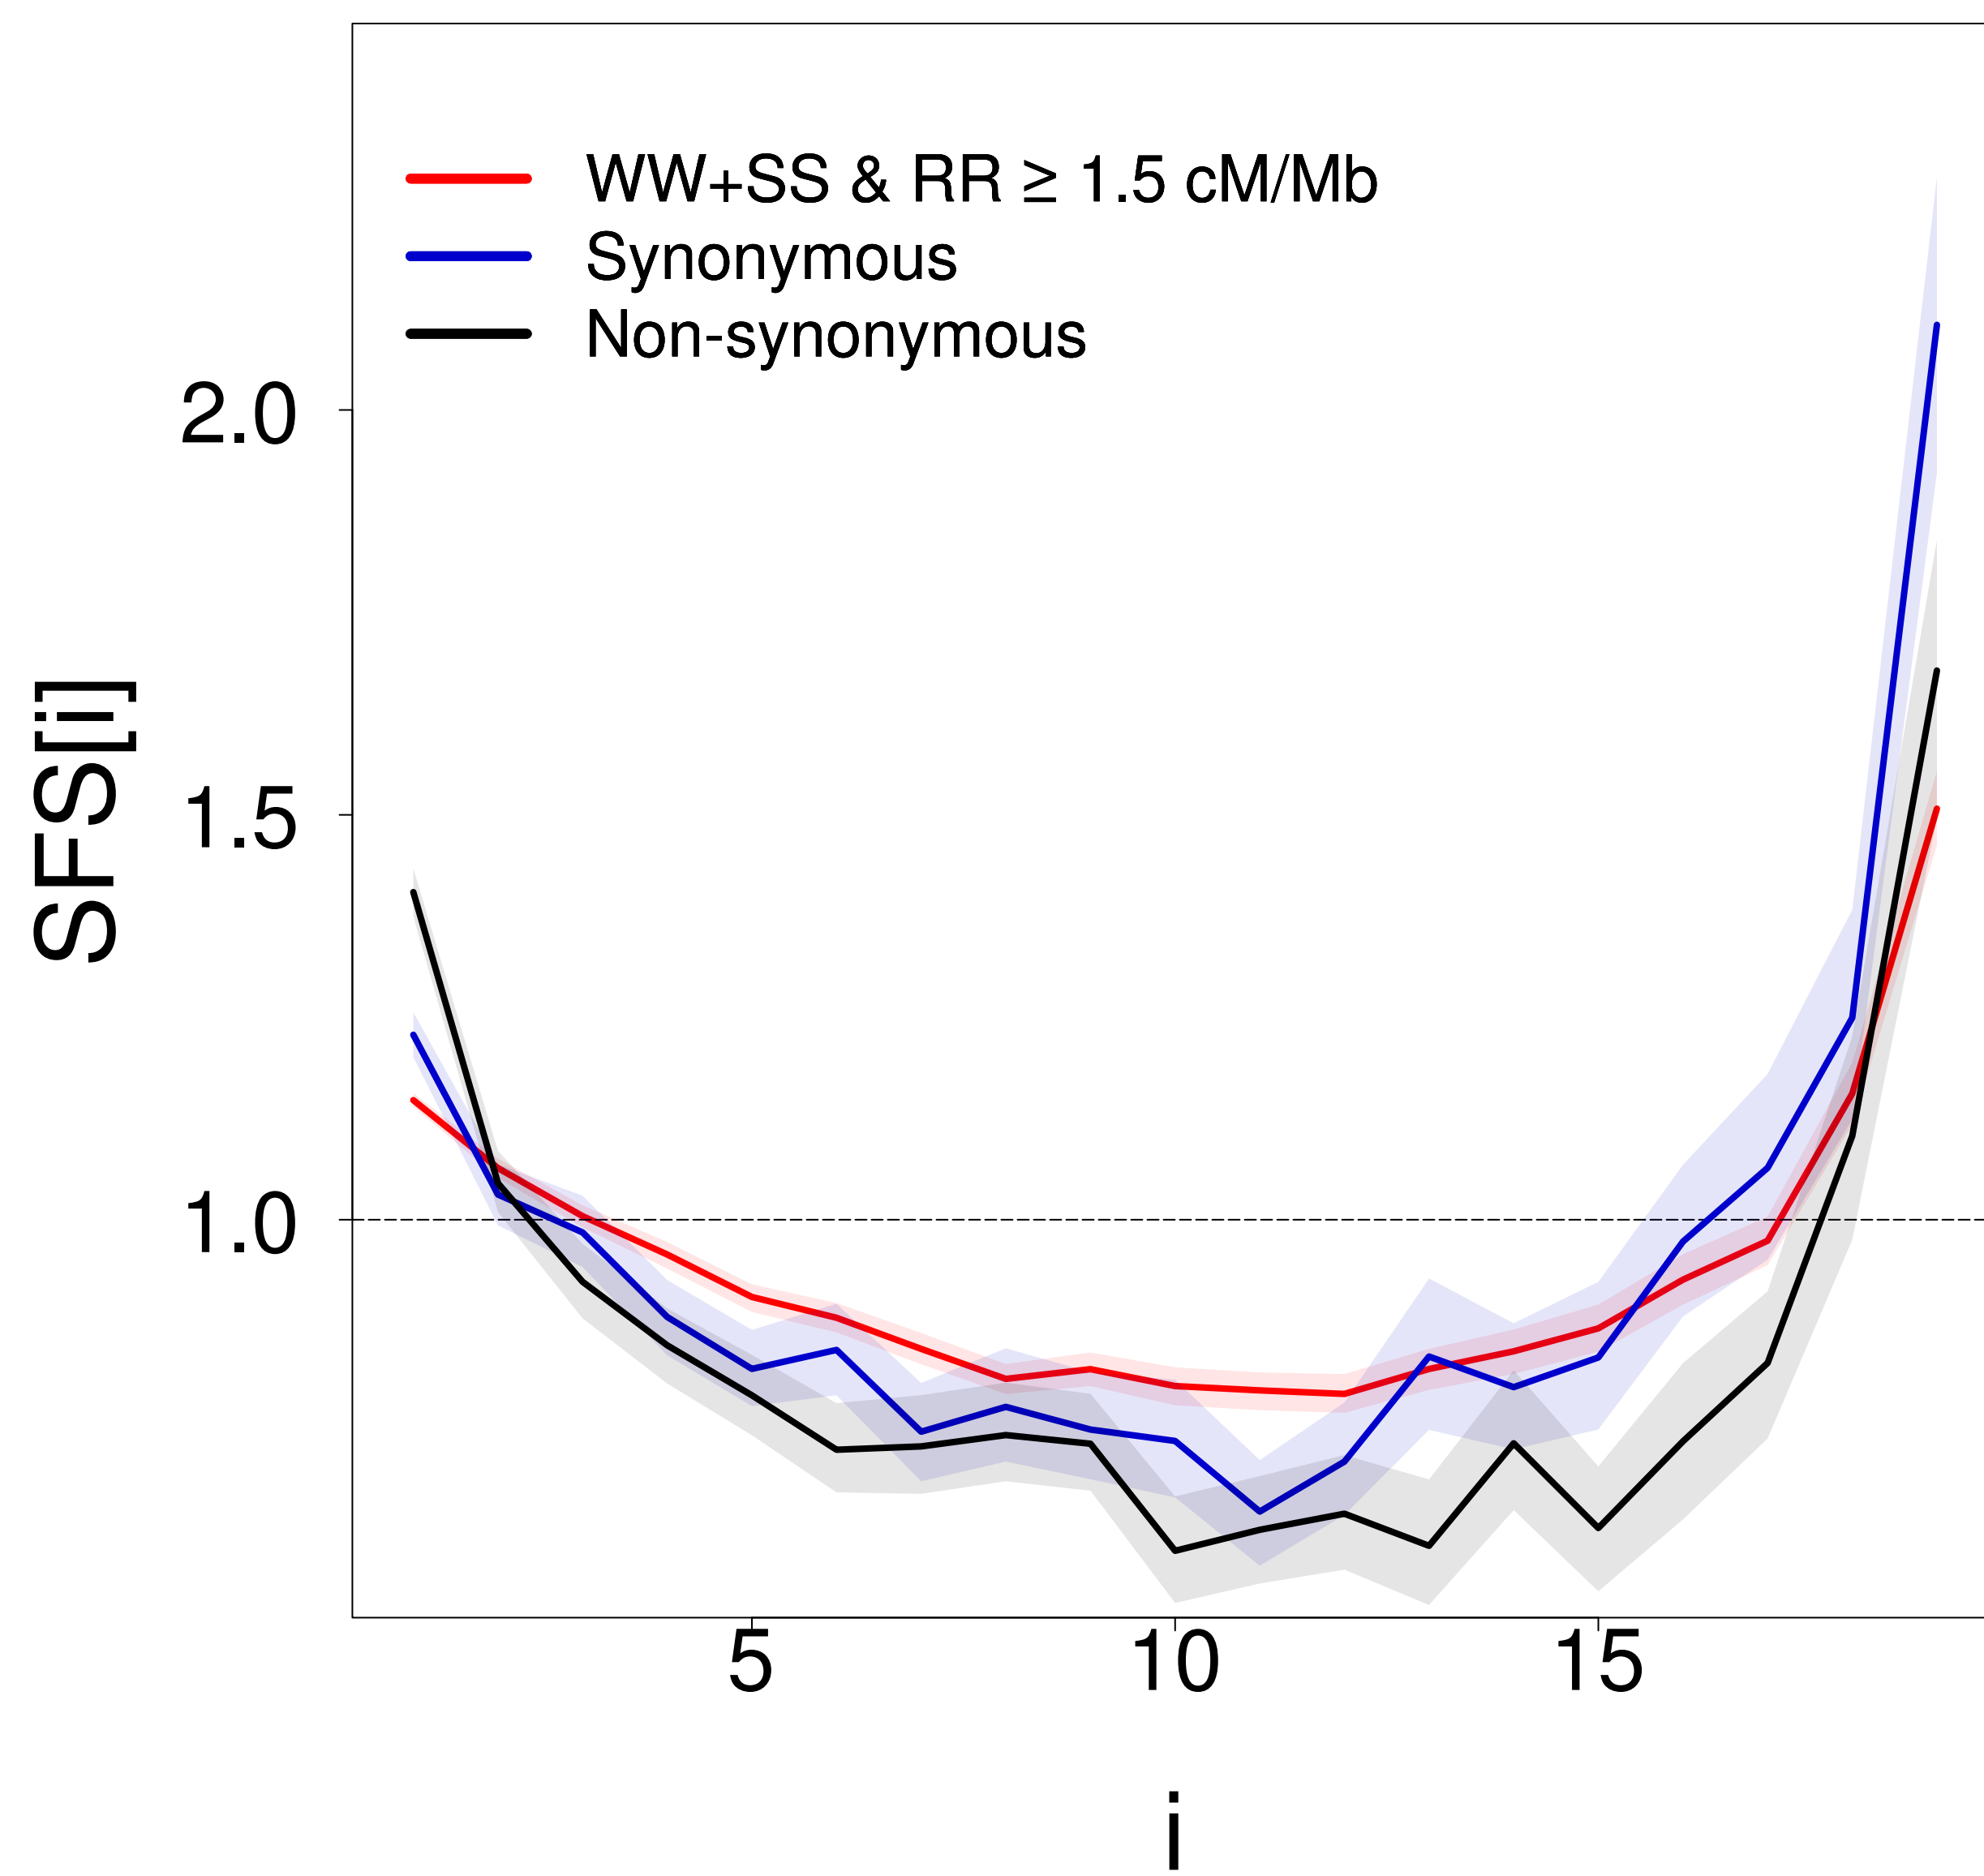**Japan**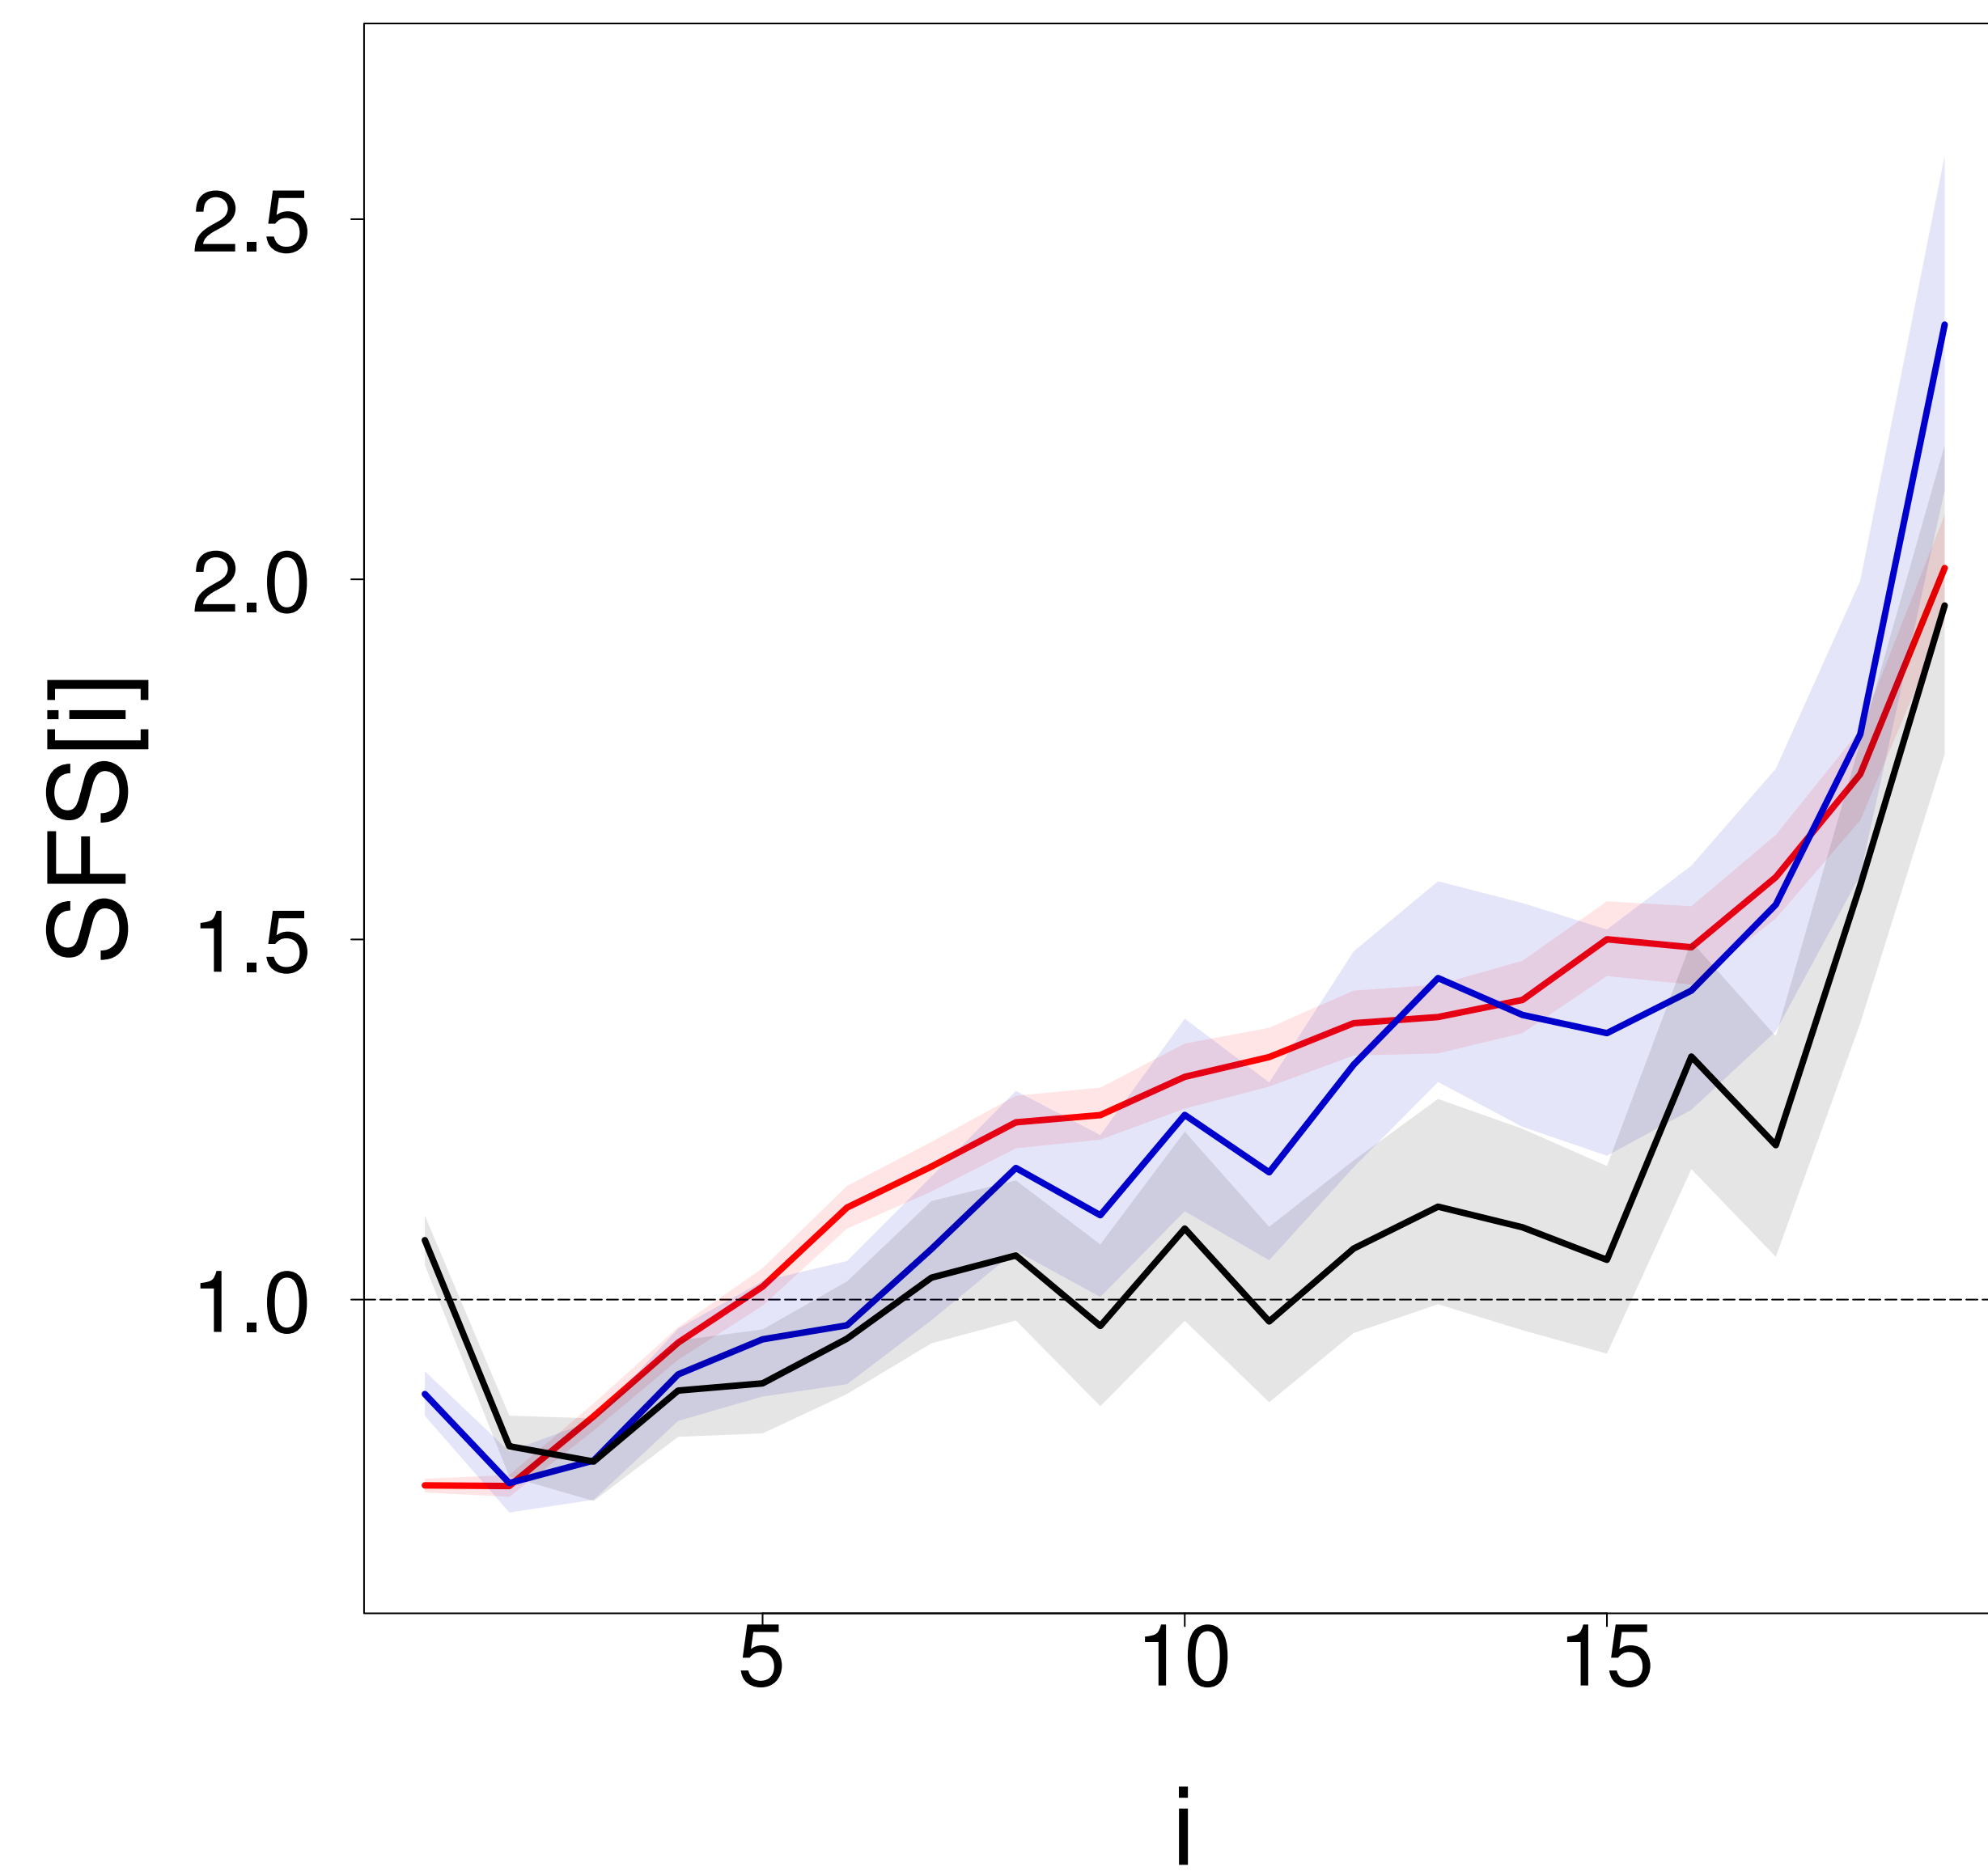**B****Yoruba  
WW+SS**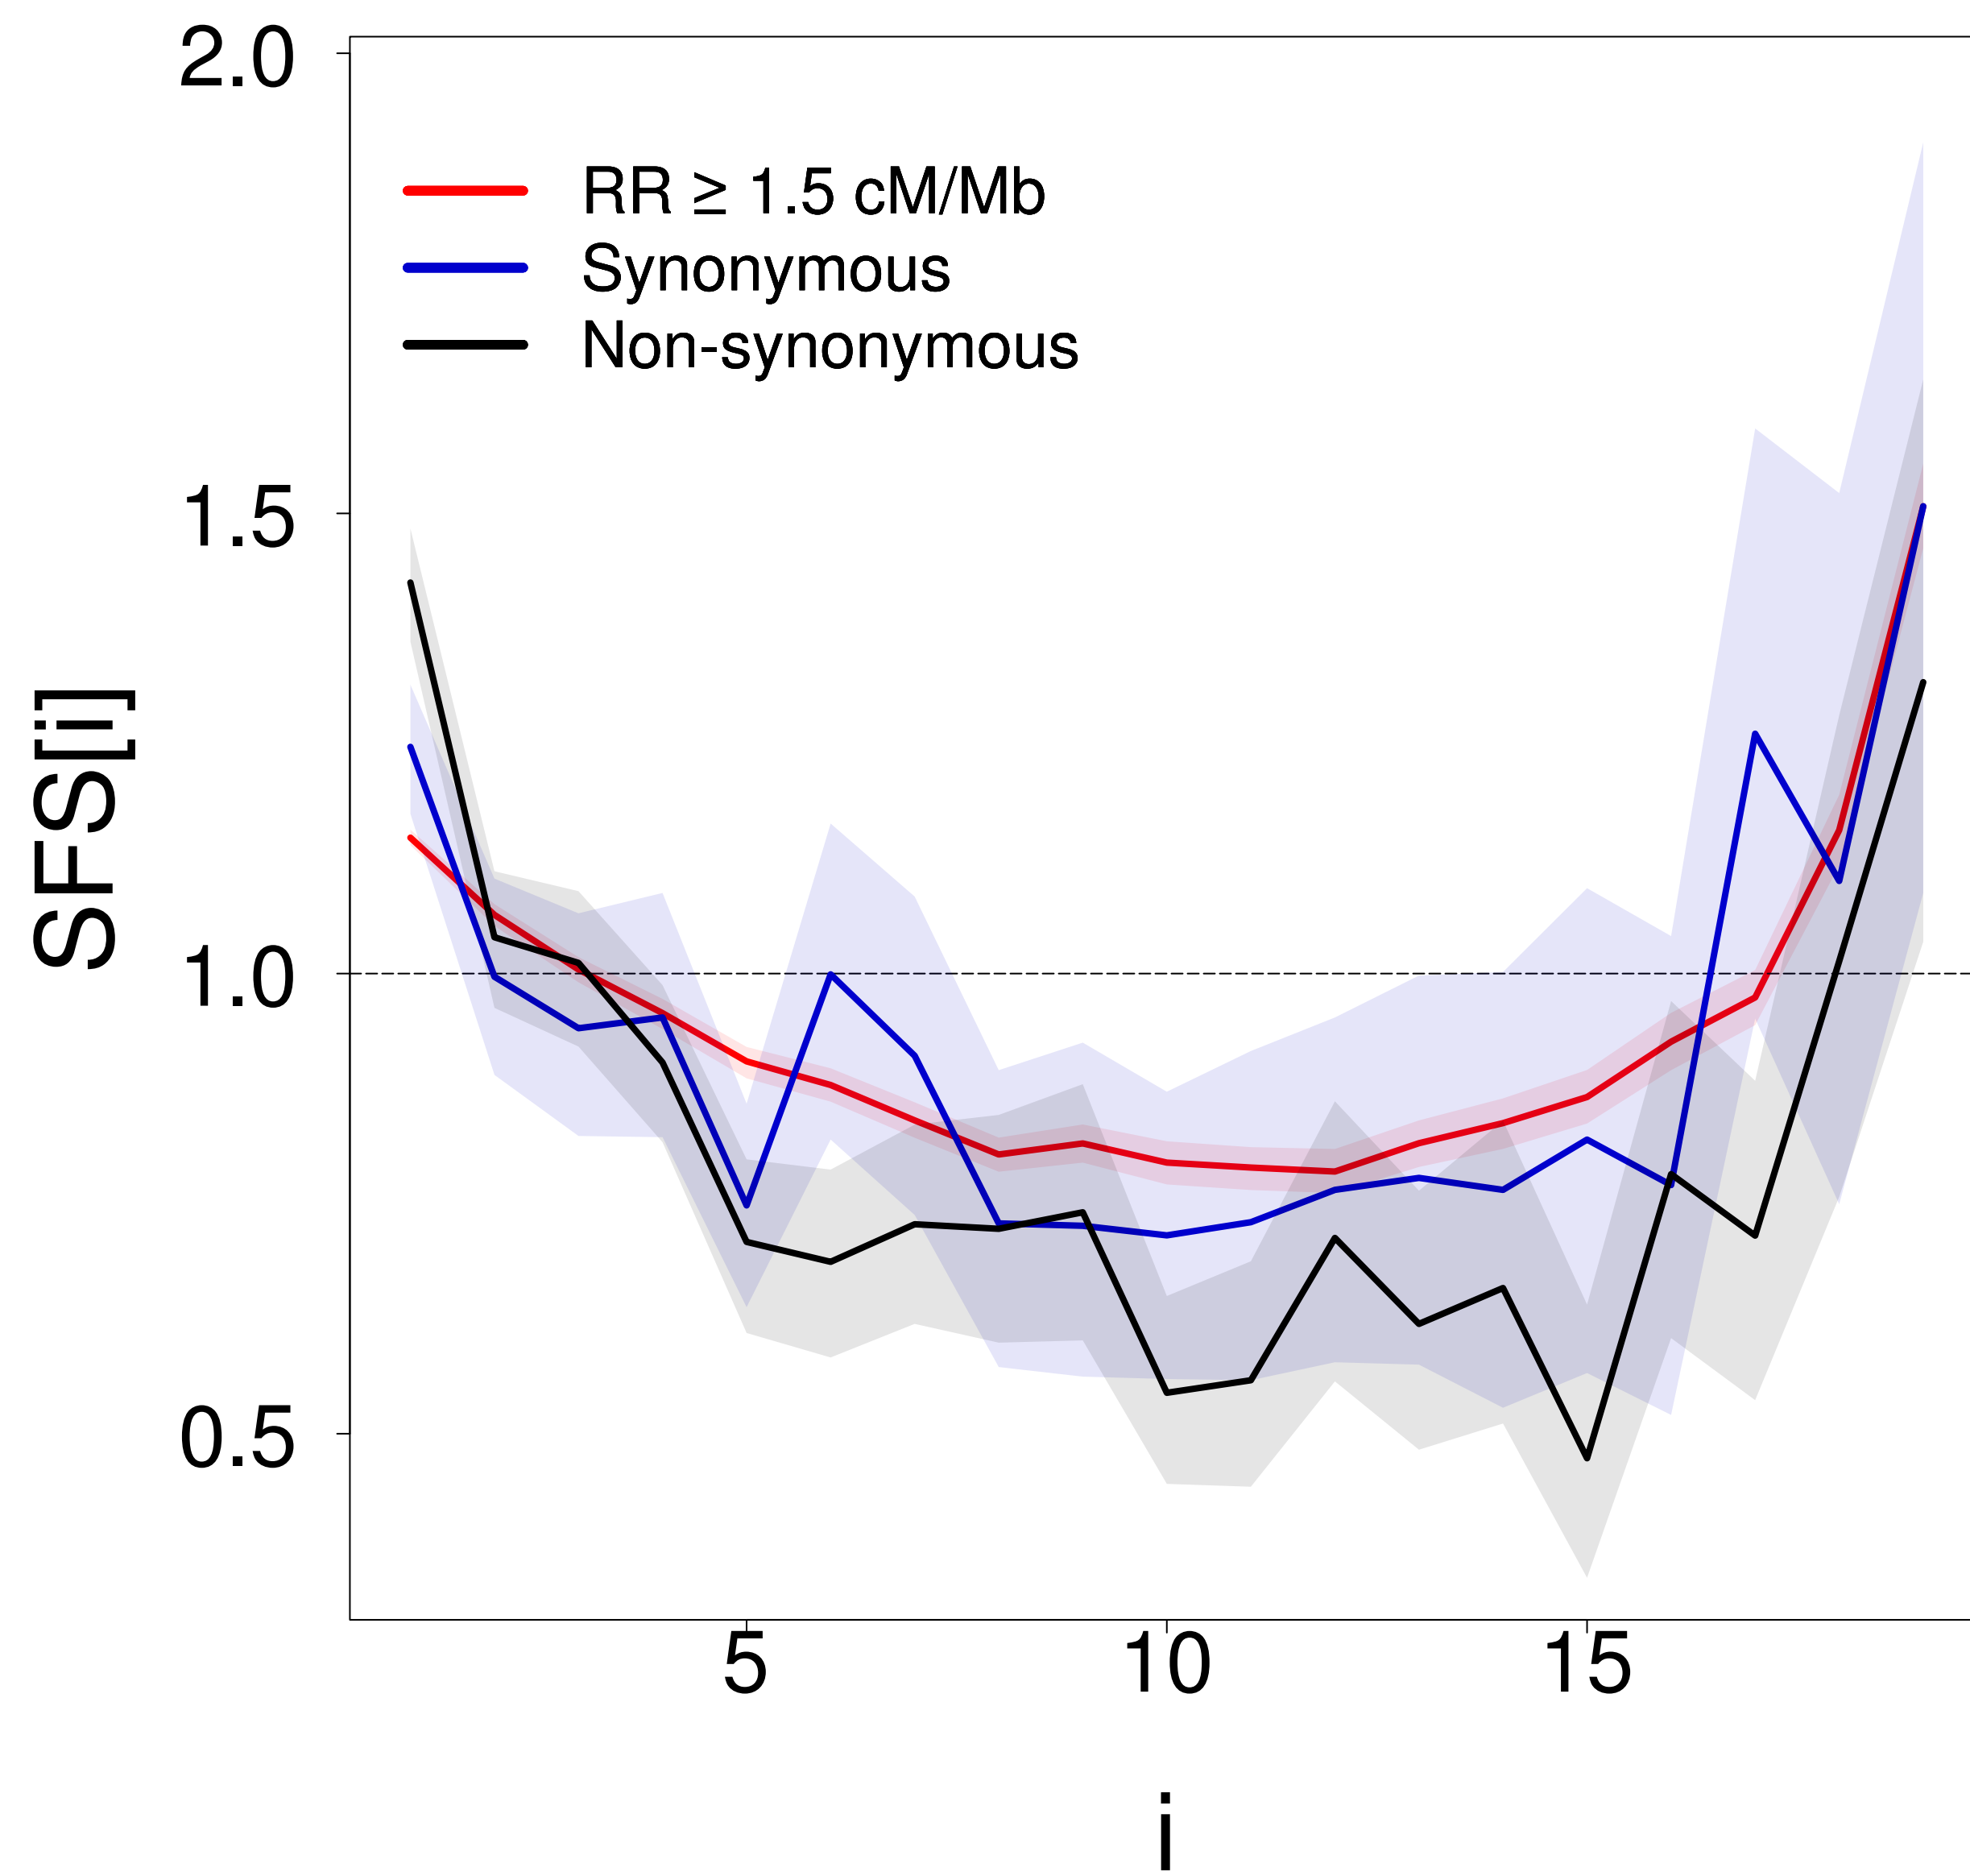**Japan  
WW+SS**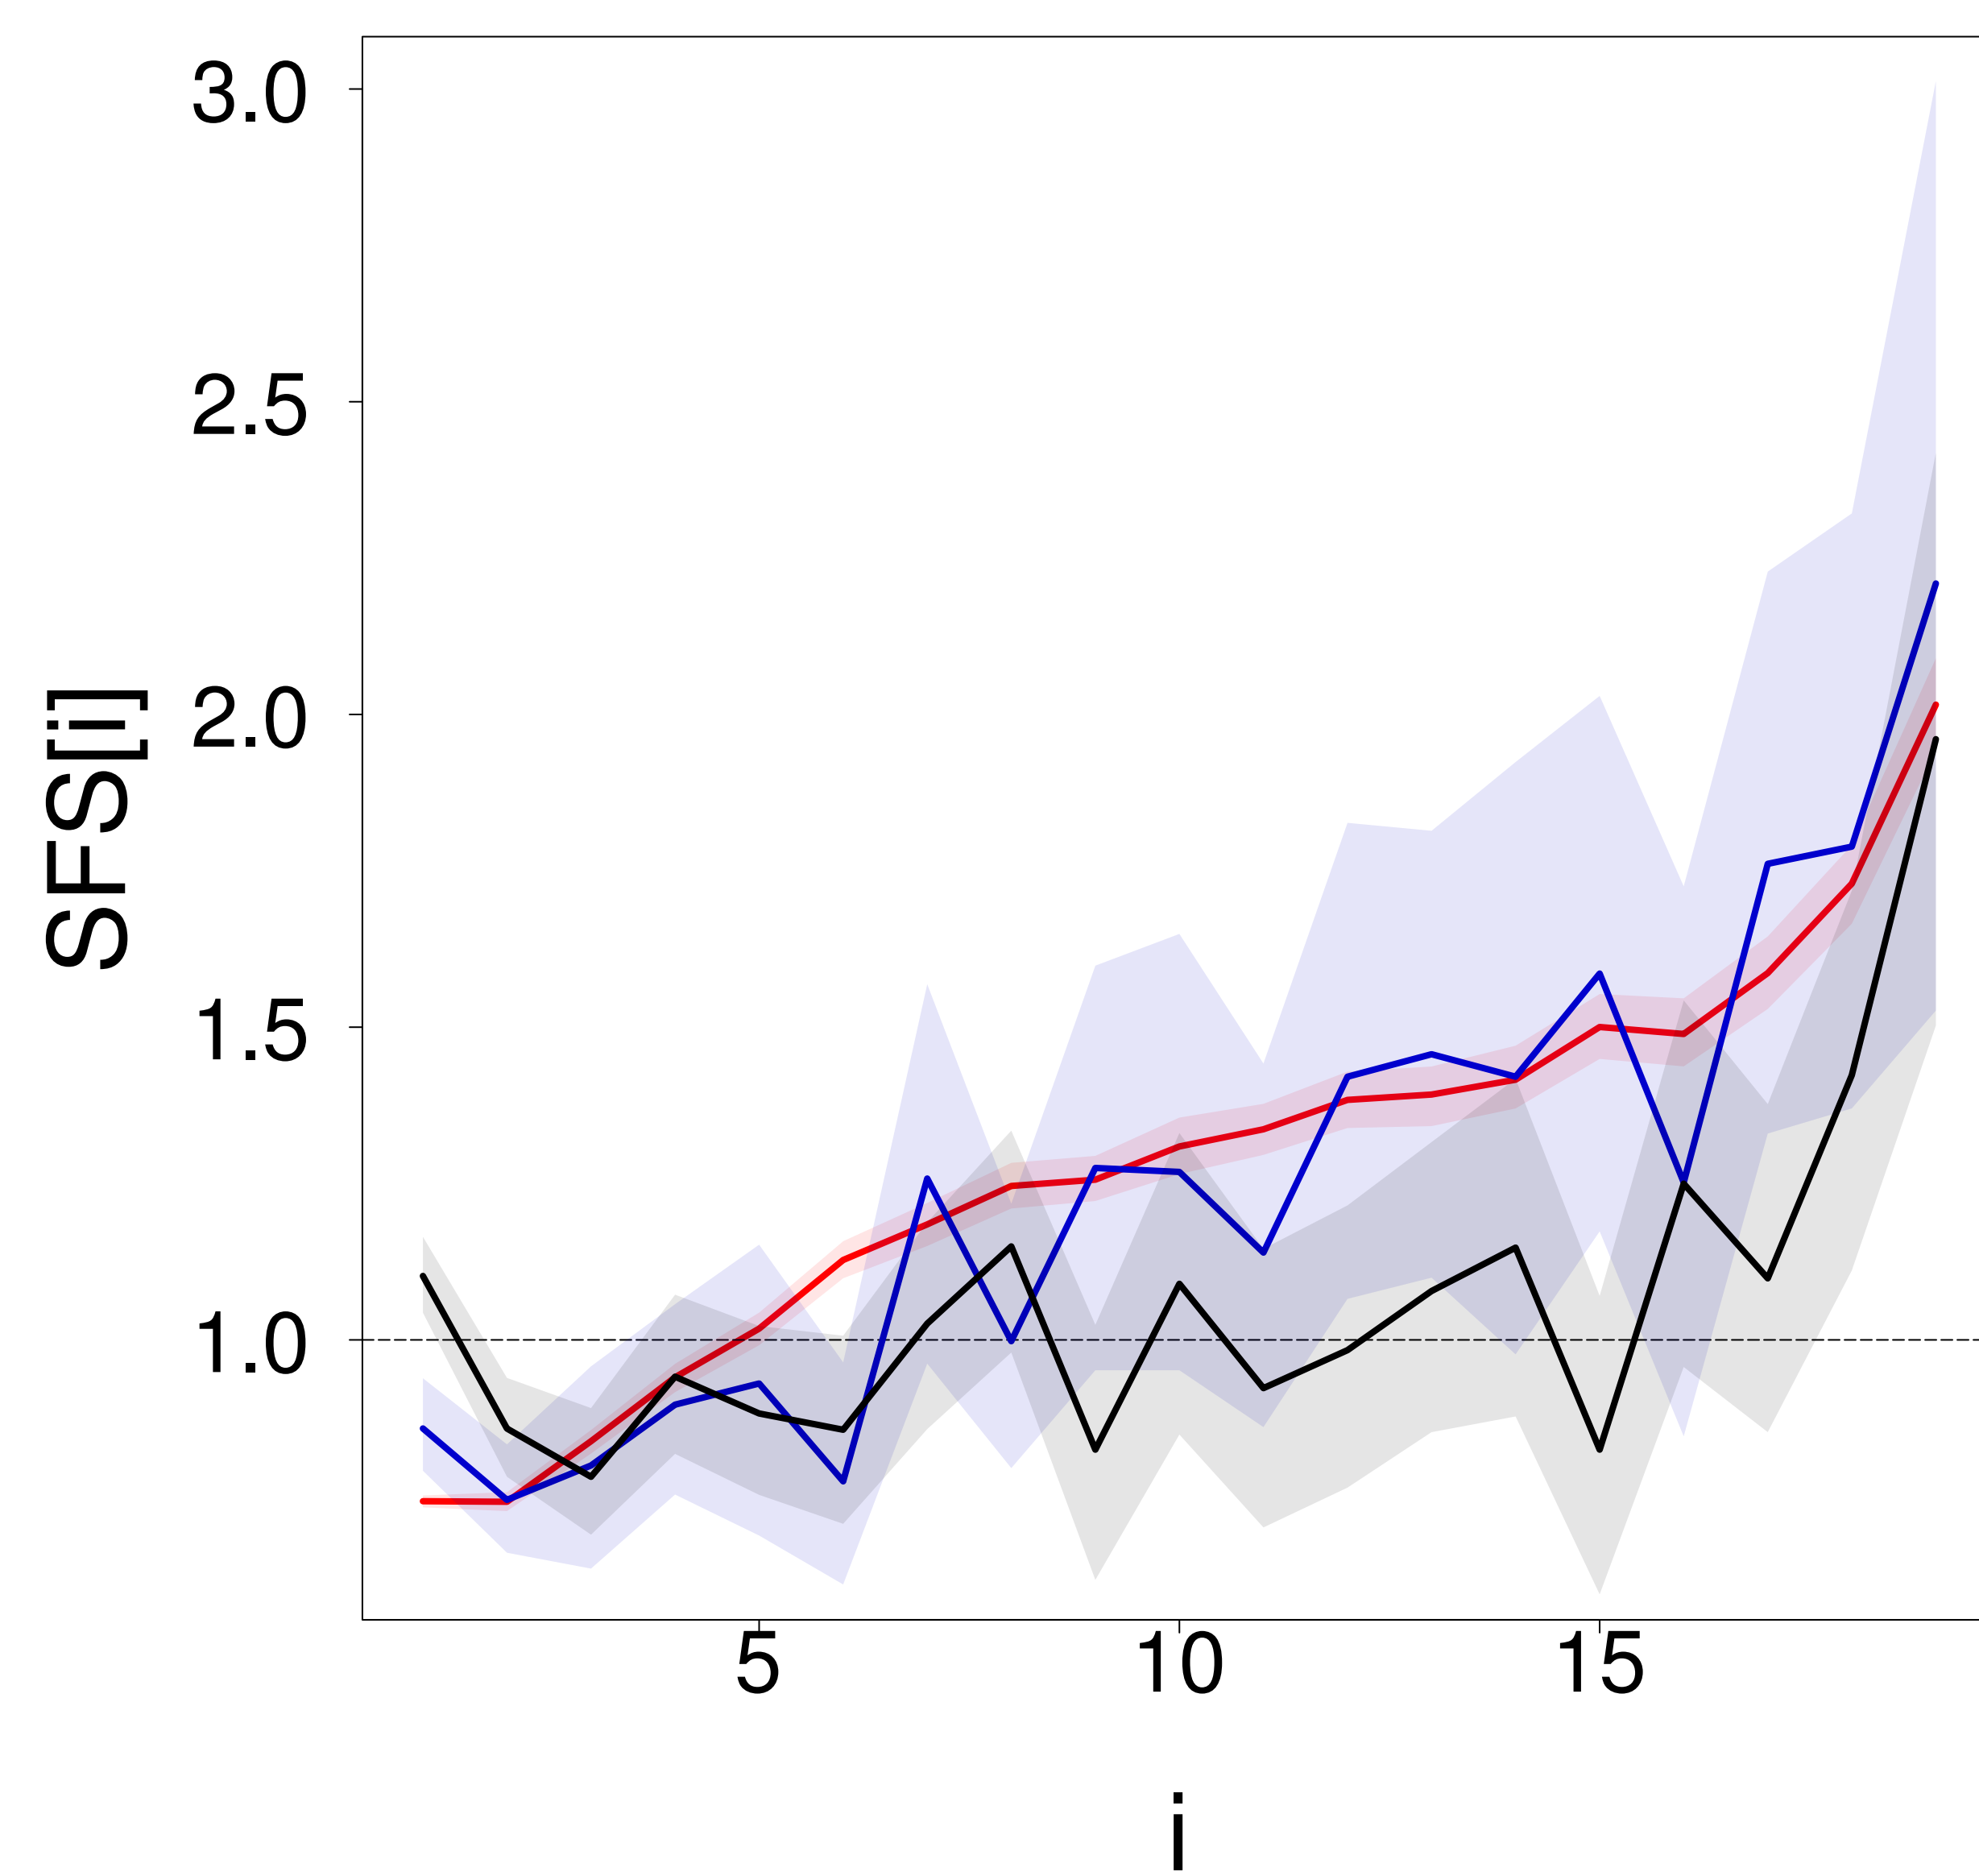

Supplement: supp [file elife-36317-supp-v2.zip]

A

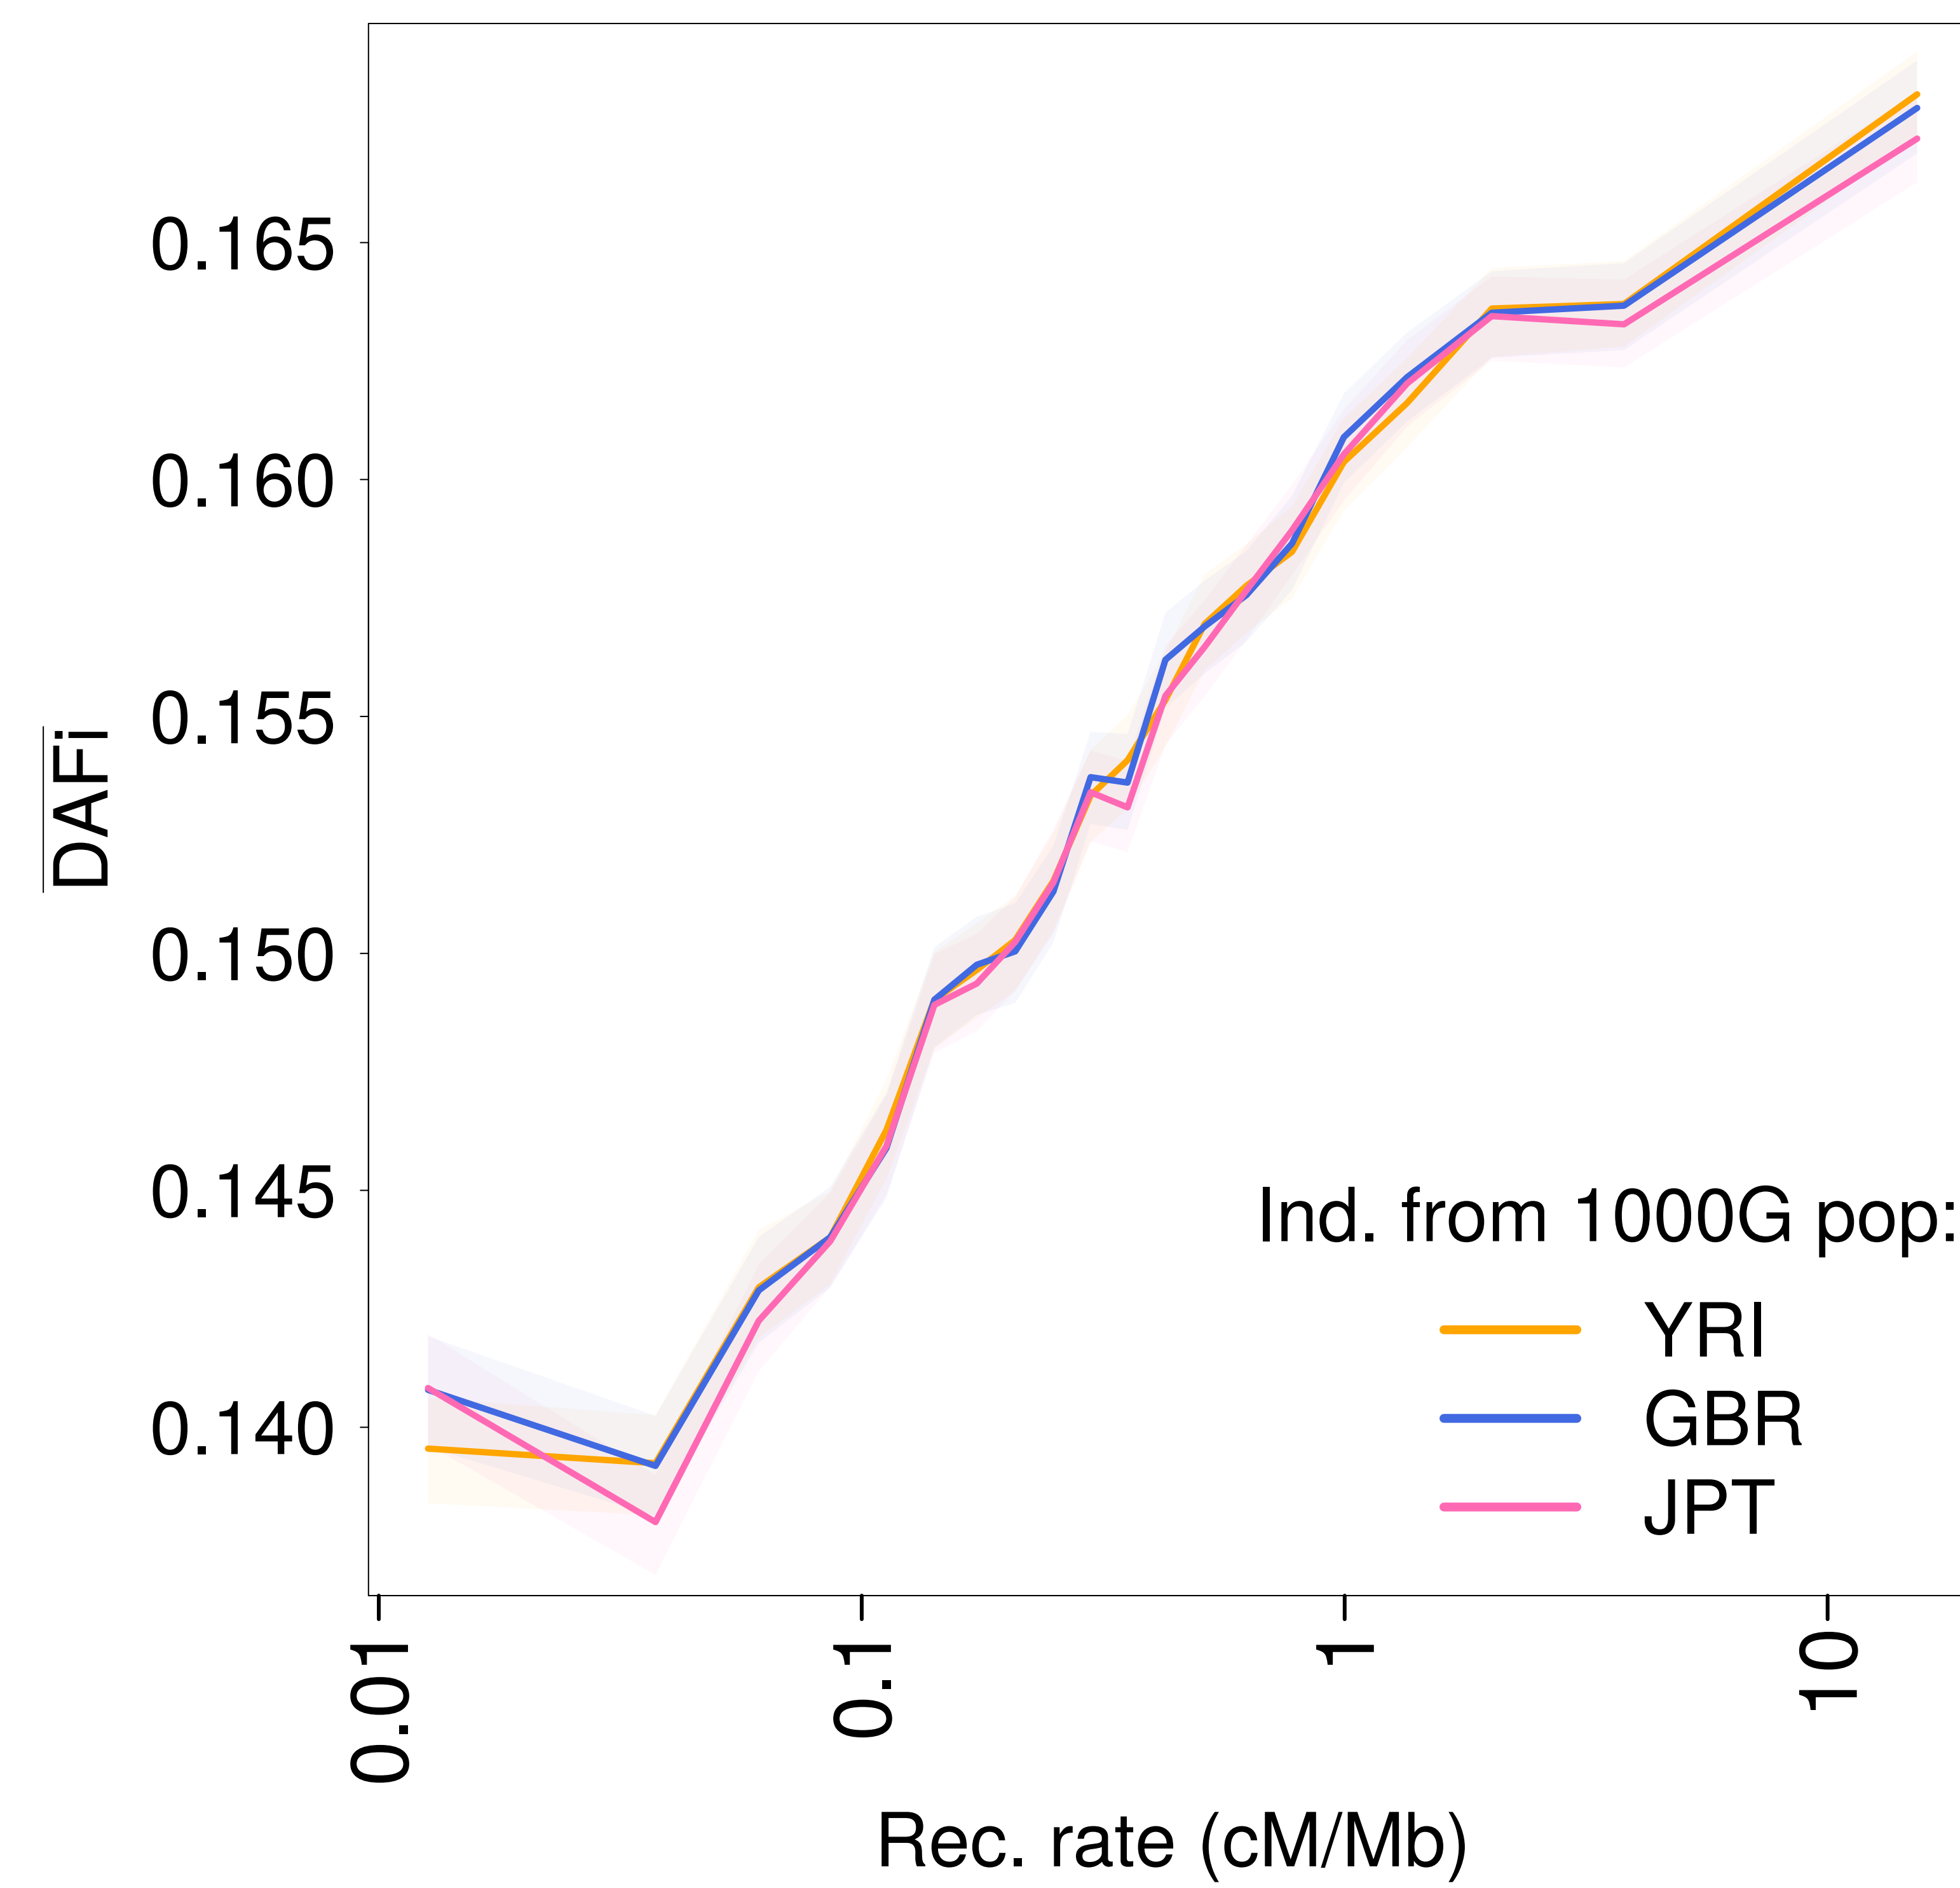

B

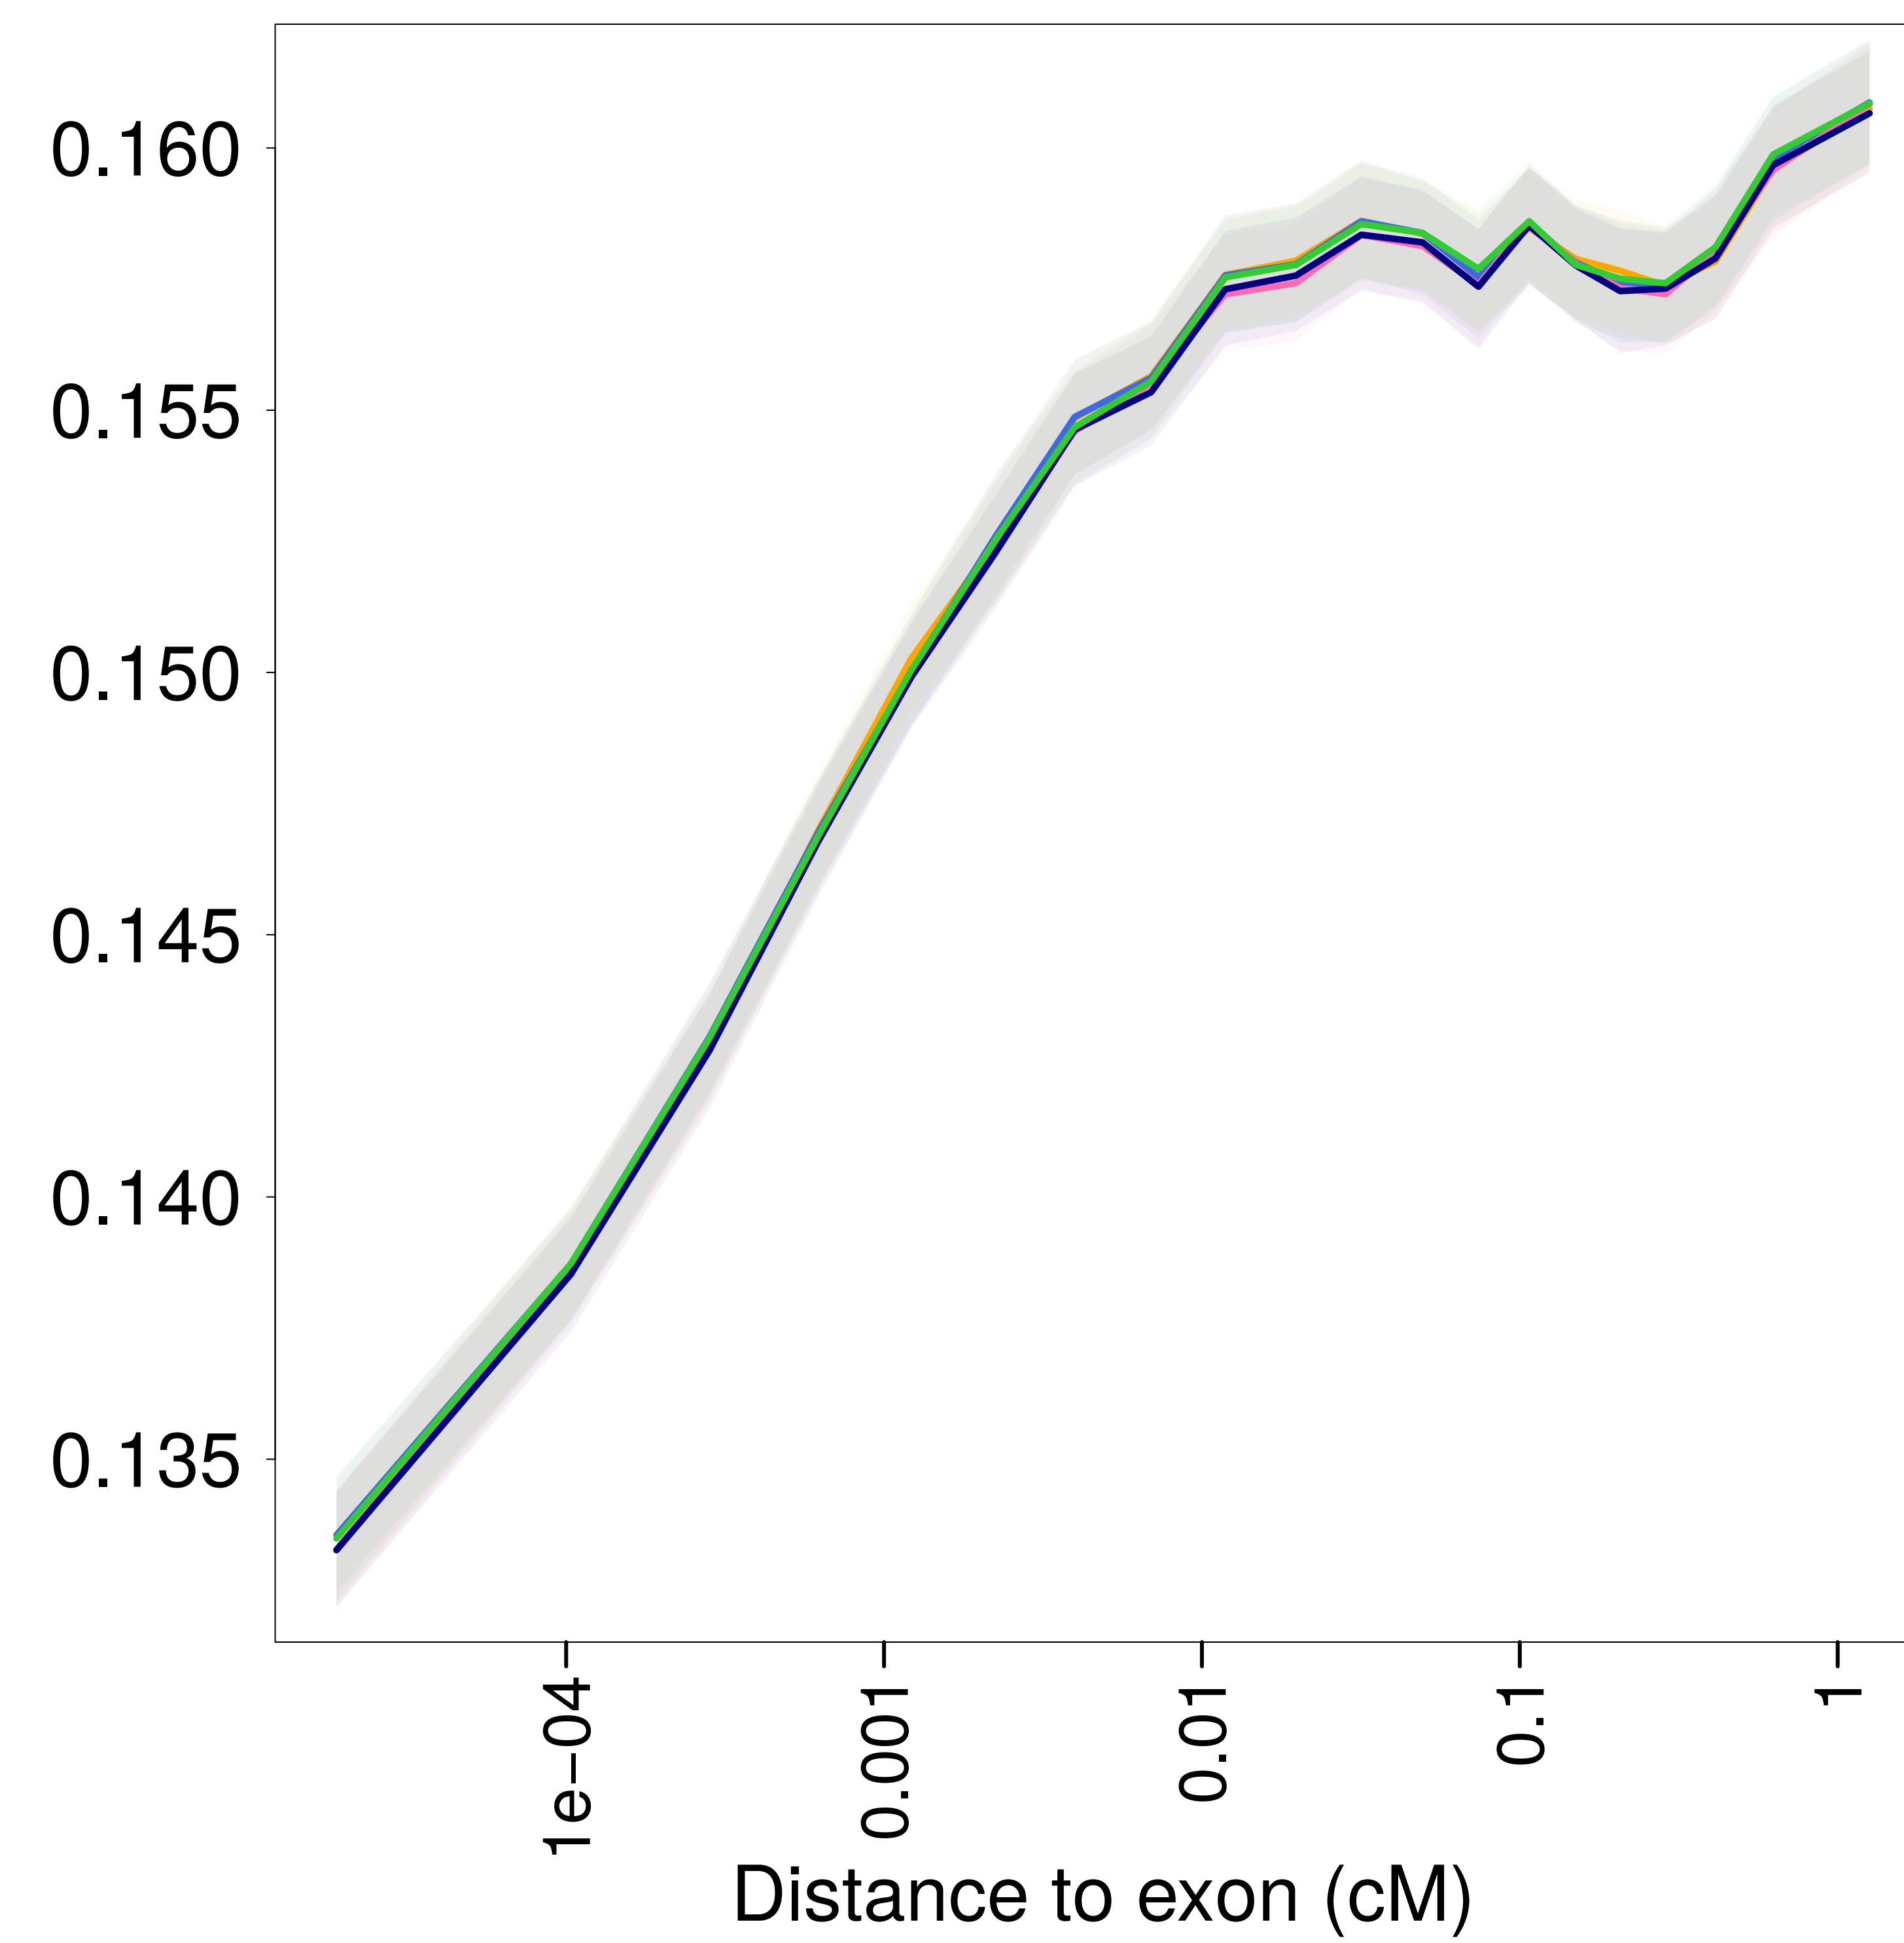

C

 $-2 \leq \text{GERP RS} < 2$ 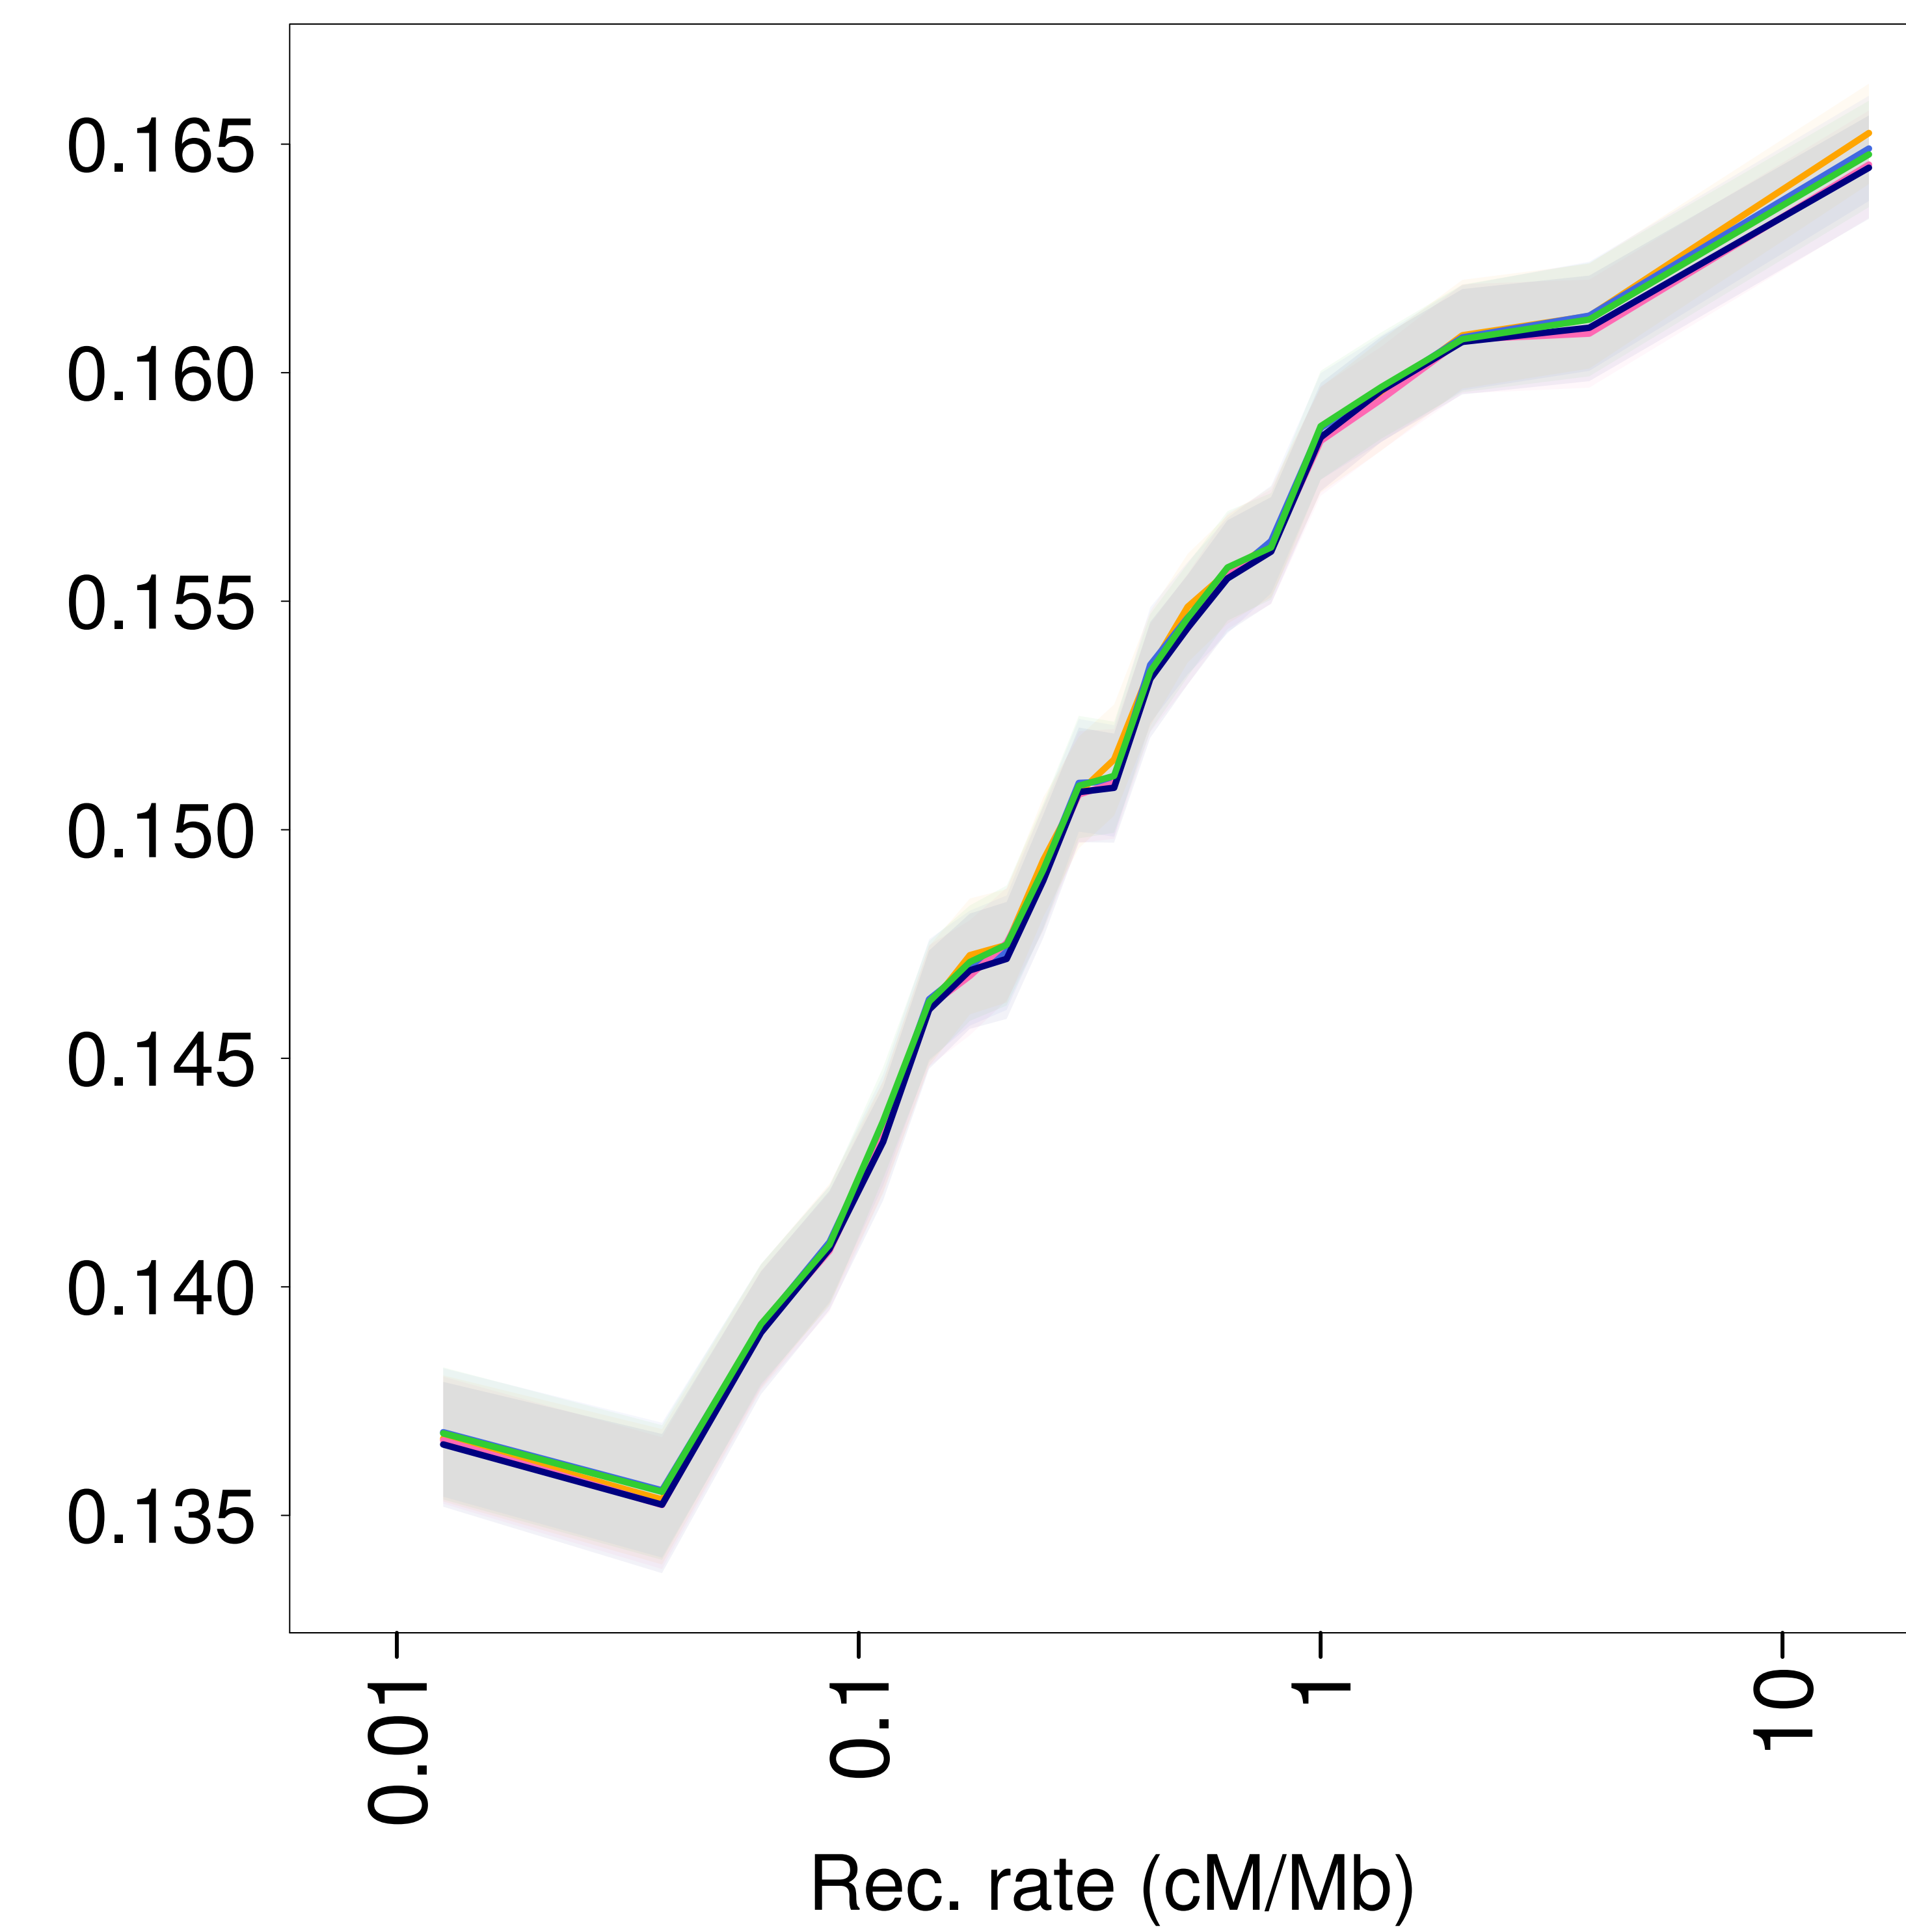

D

 $2 \leq \text{GERP RS} < 4$ 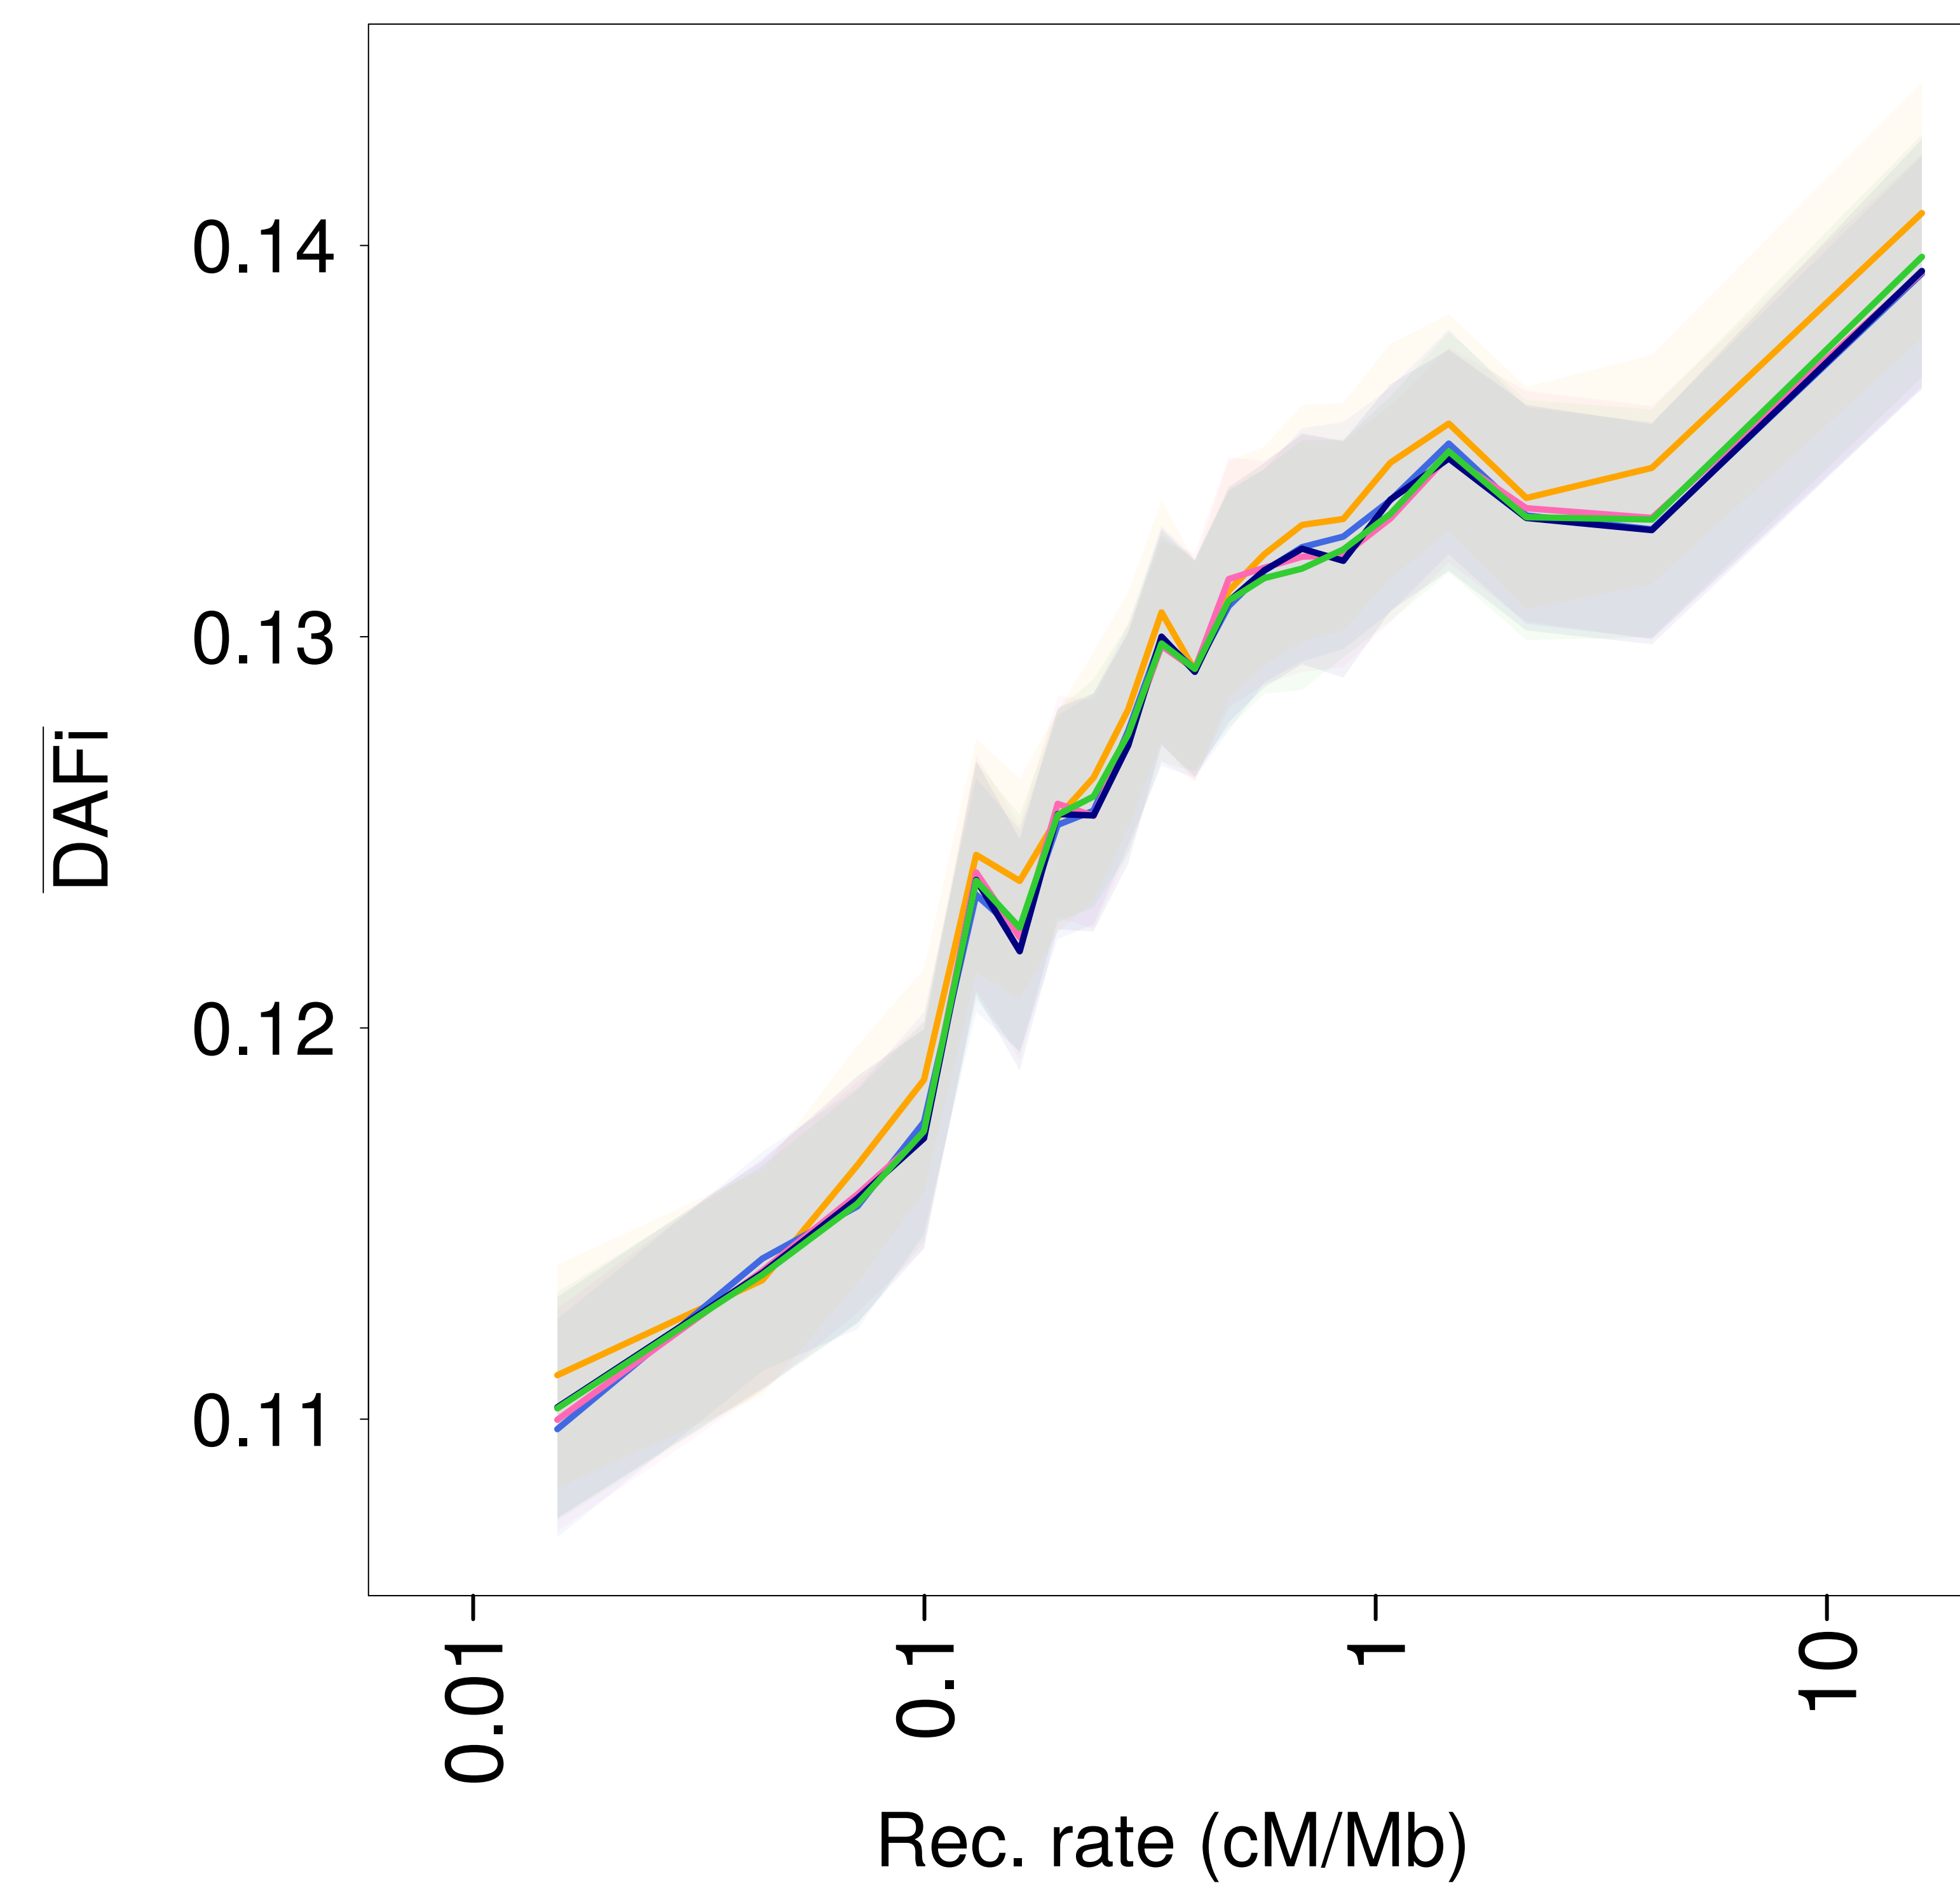

E

 $\text{GERP RS} \geq 4$ 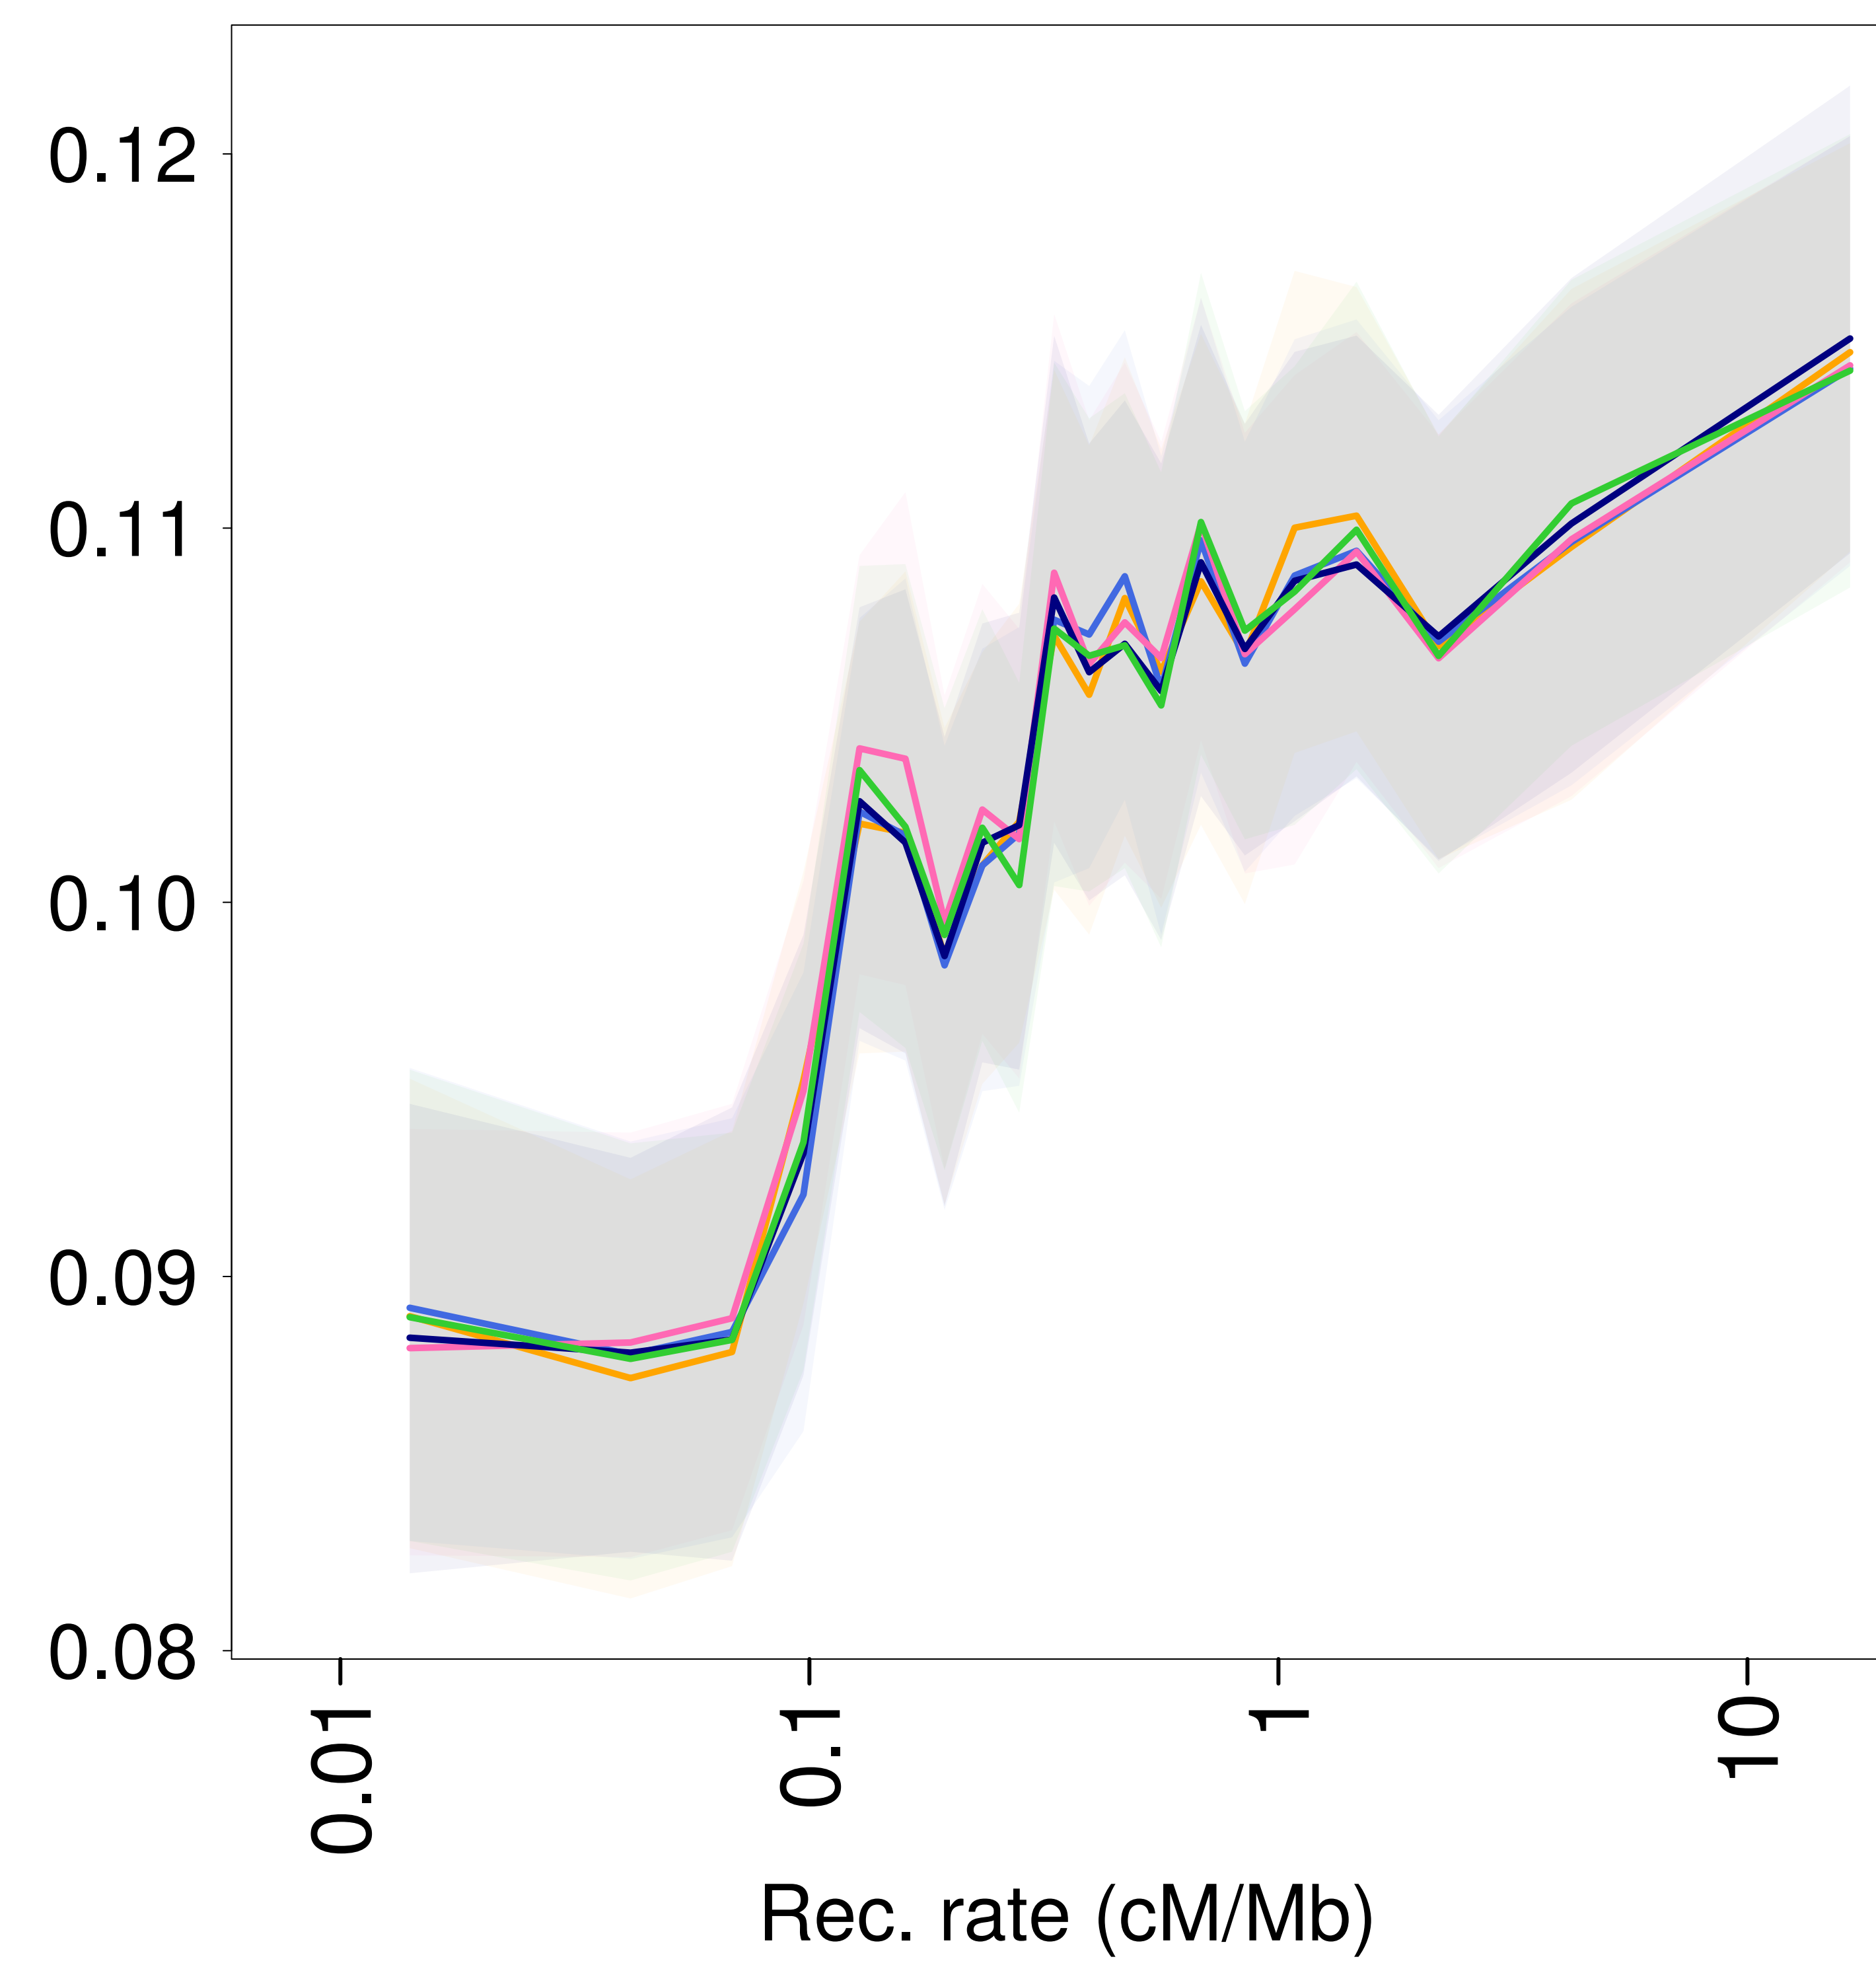

F

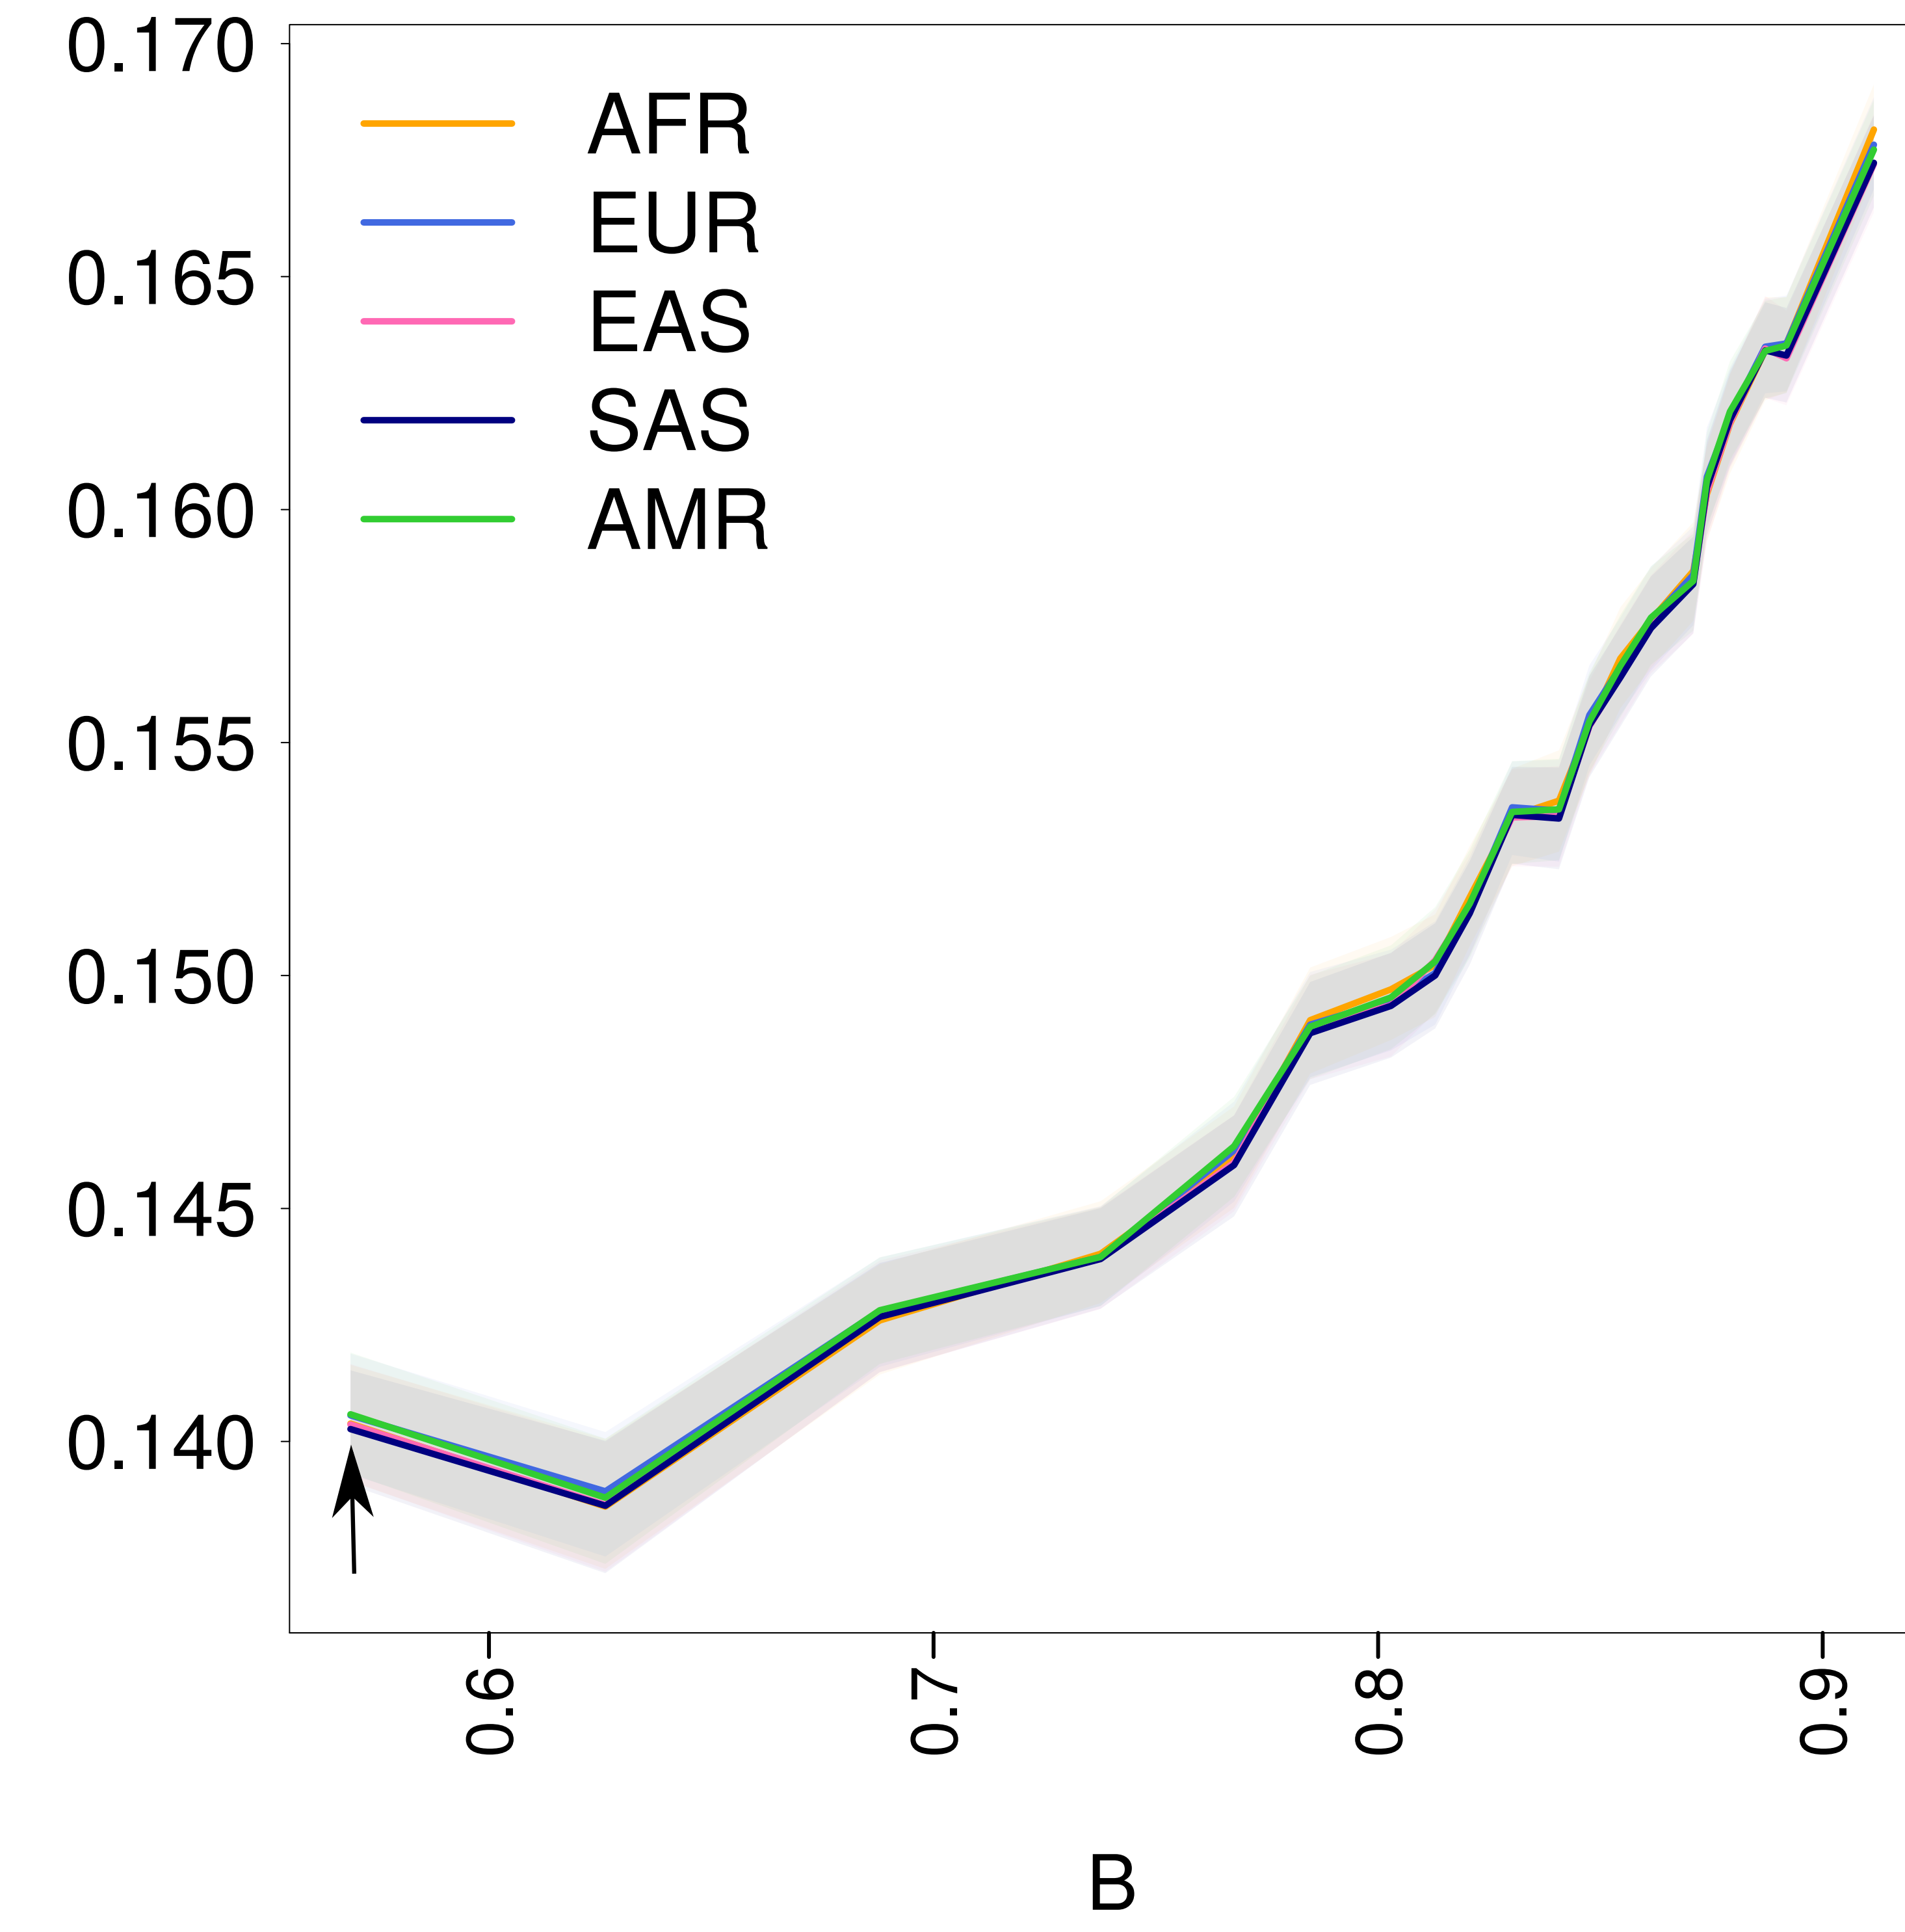

Supplement: supp [file elife-36317-supp-v2.zip]

A

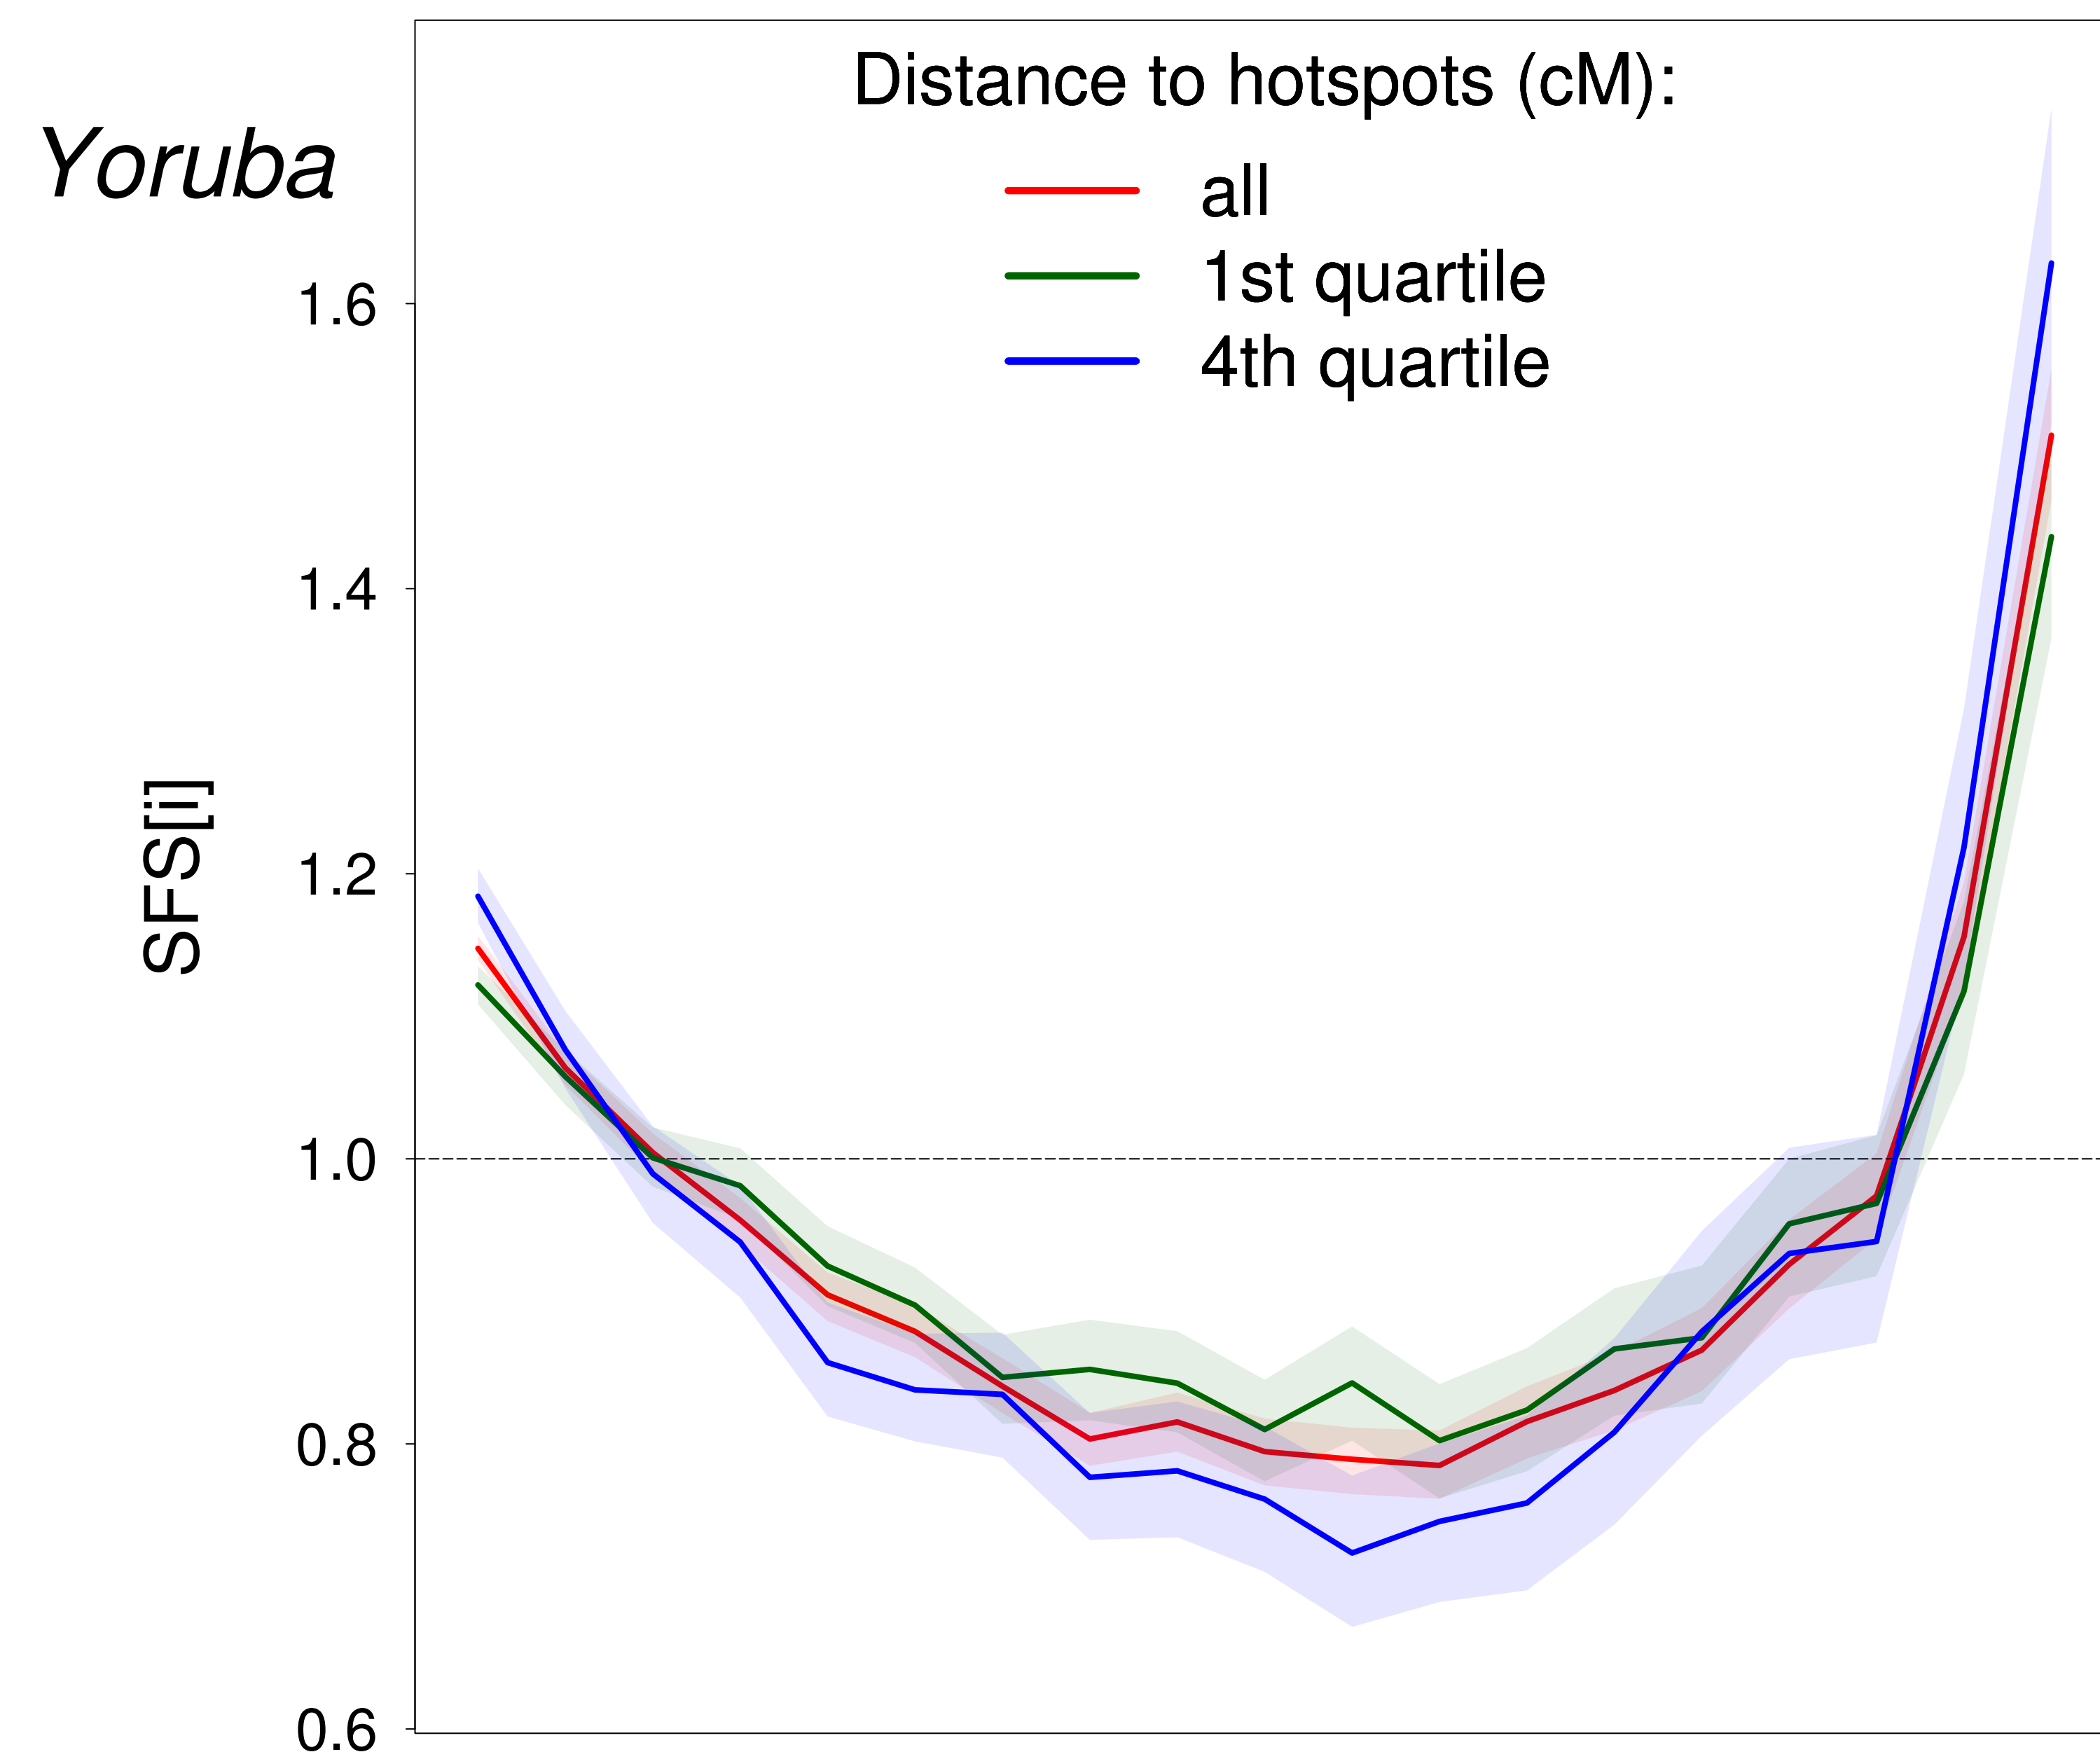

B

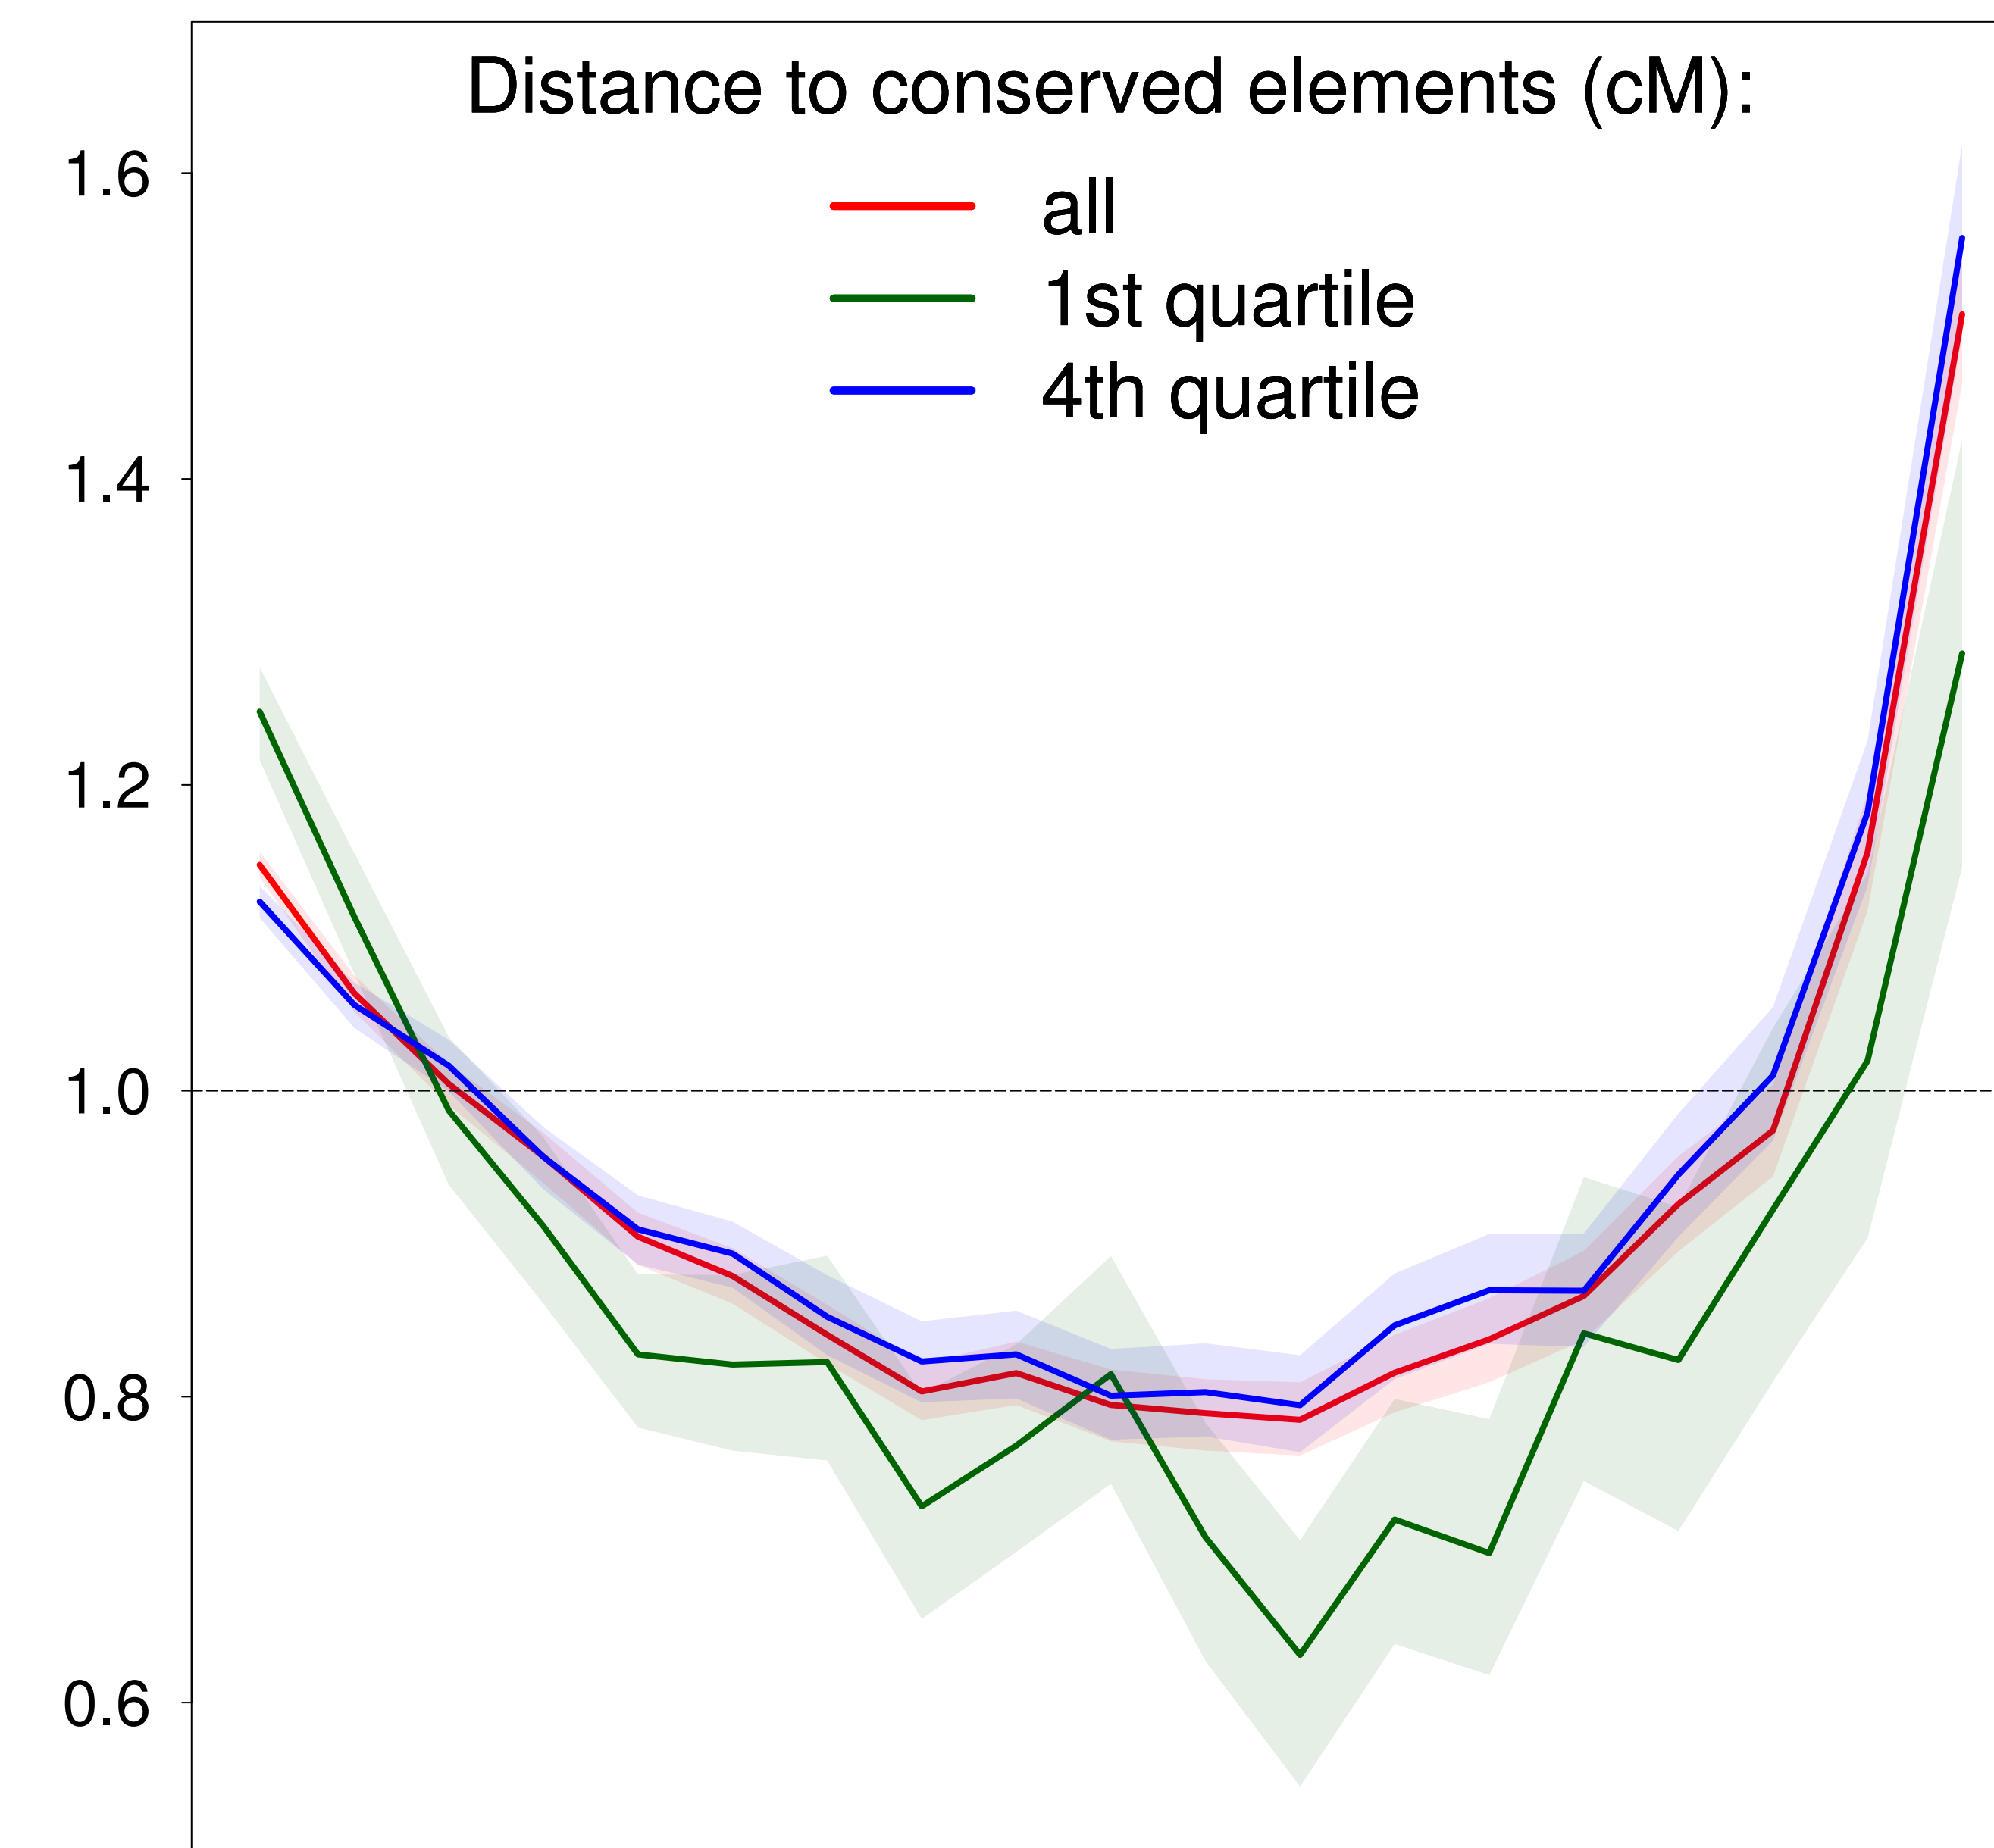

C

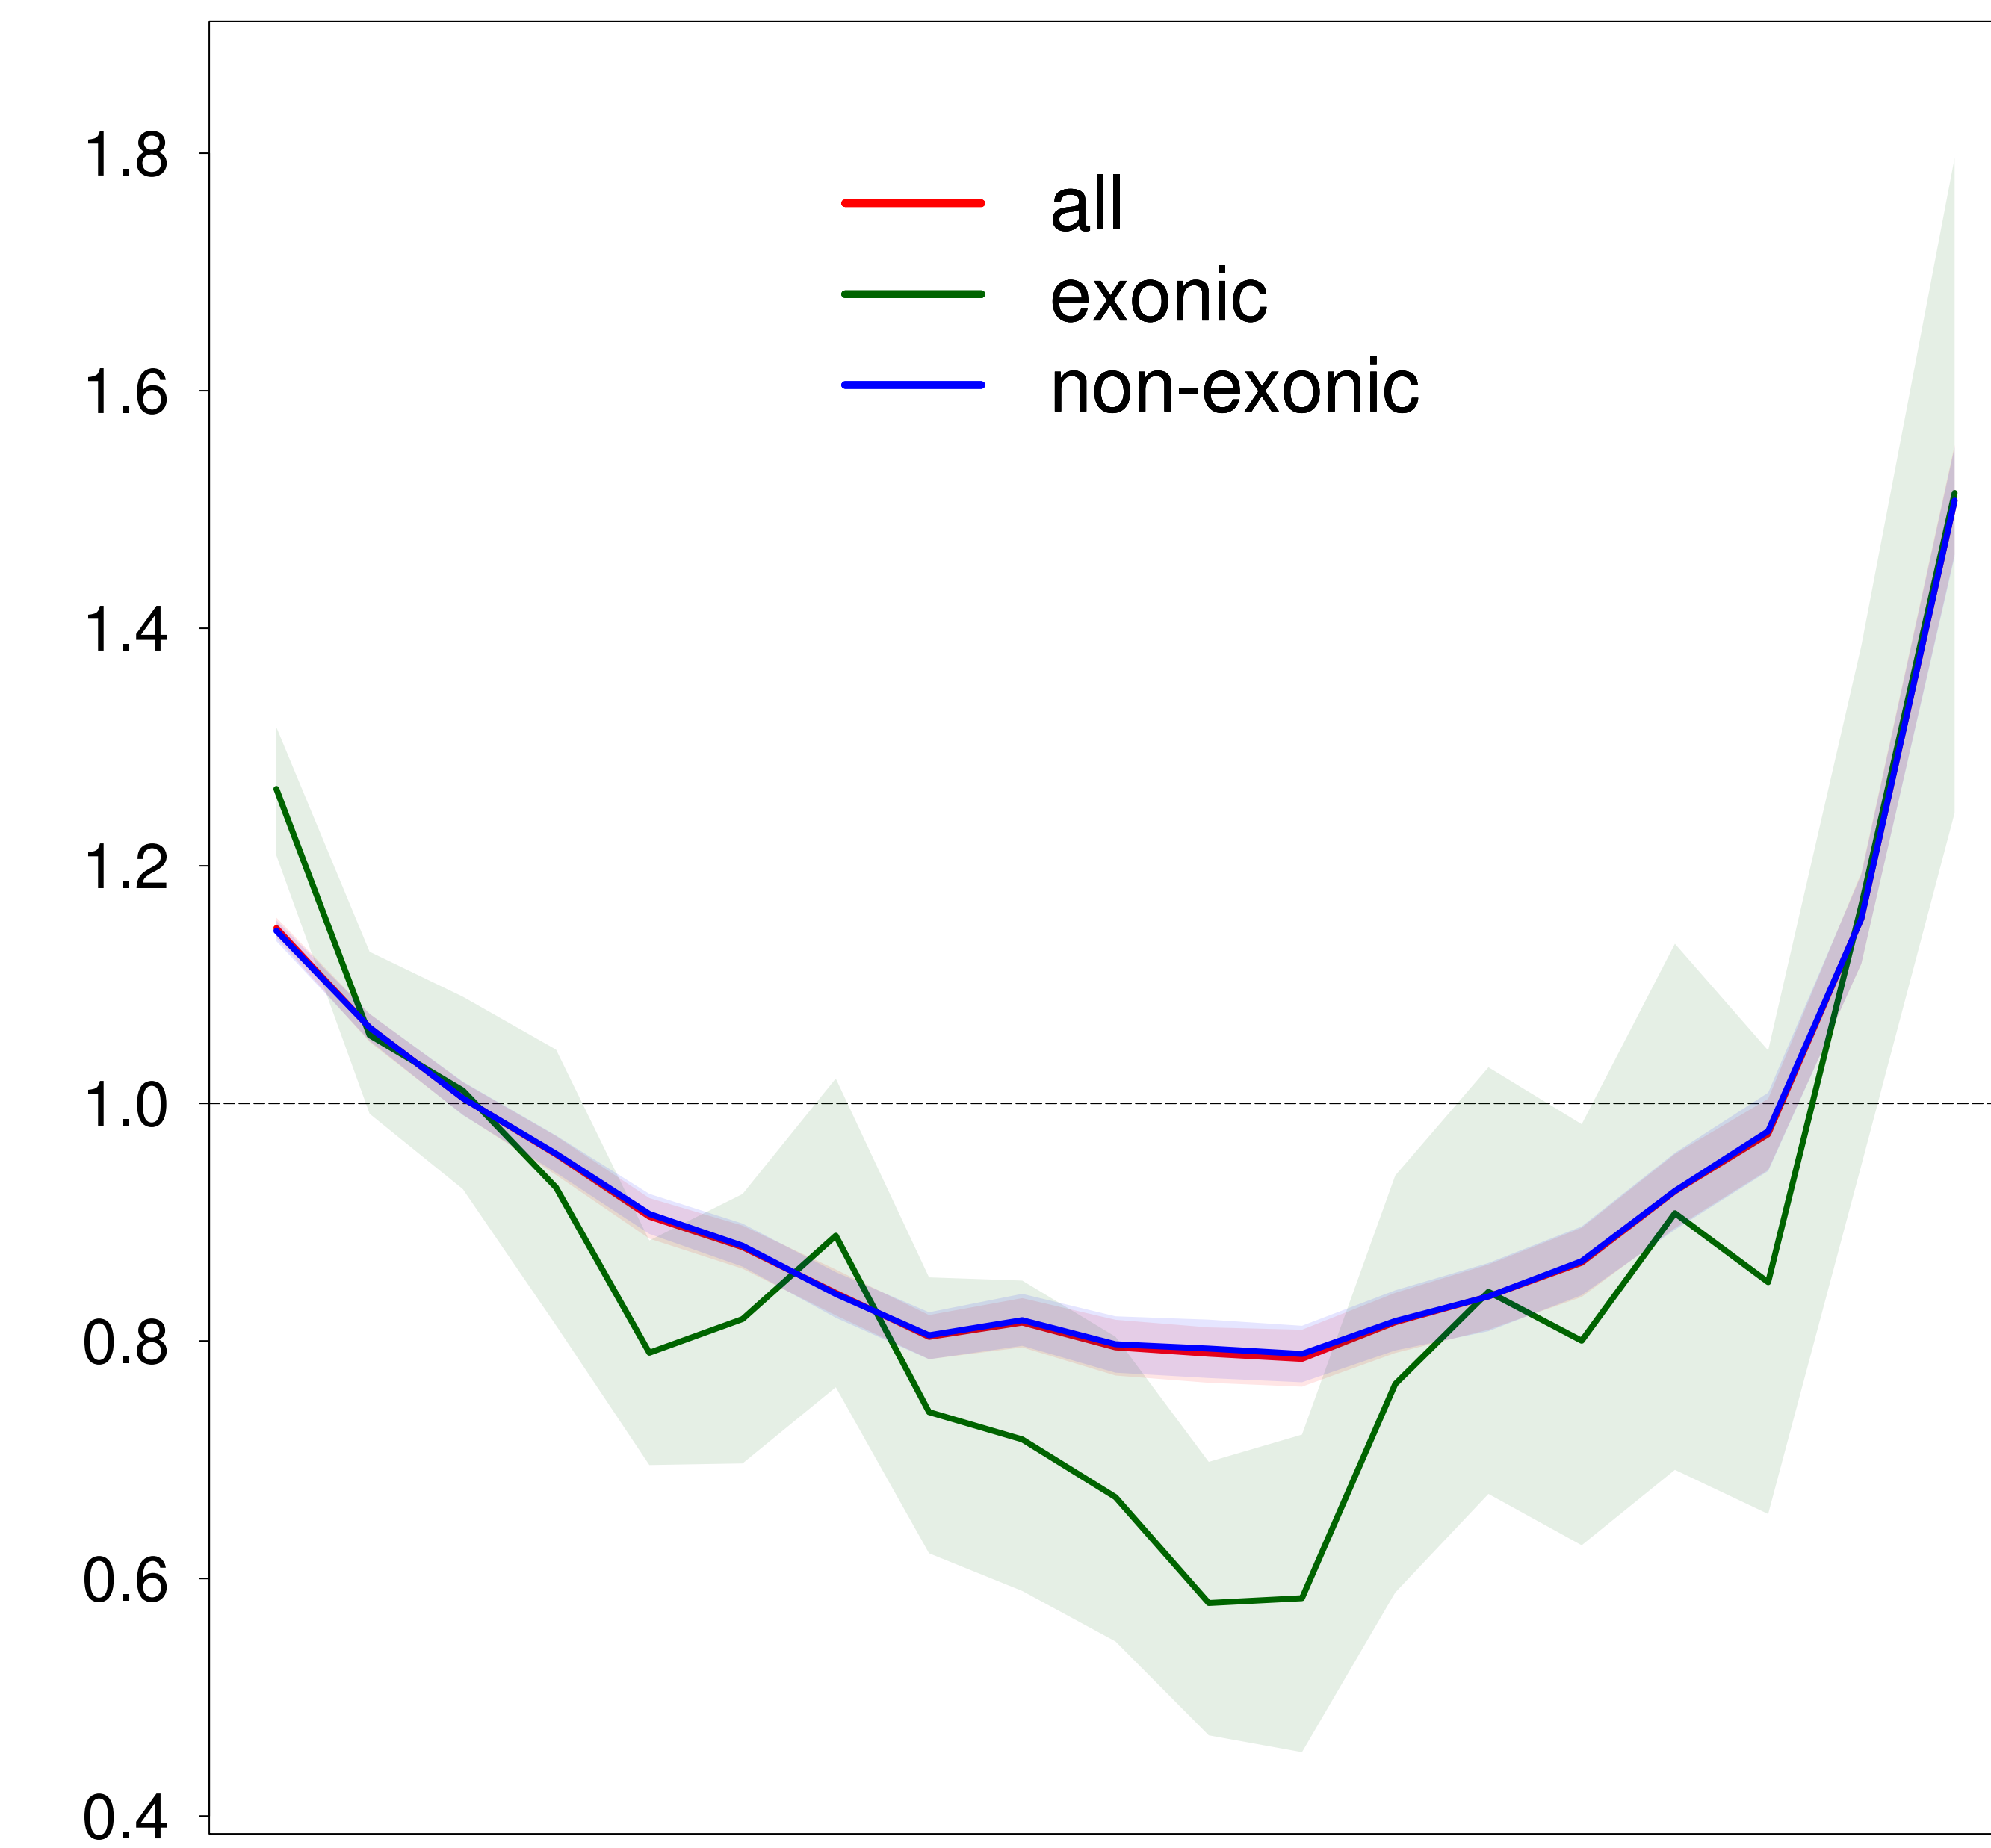*Japan*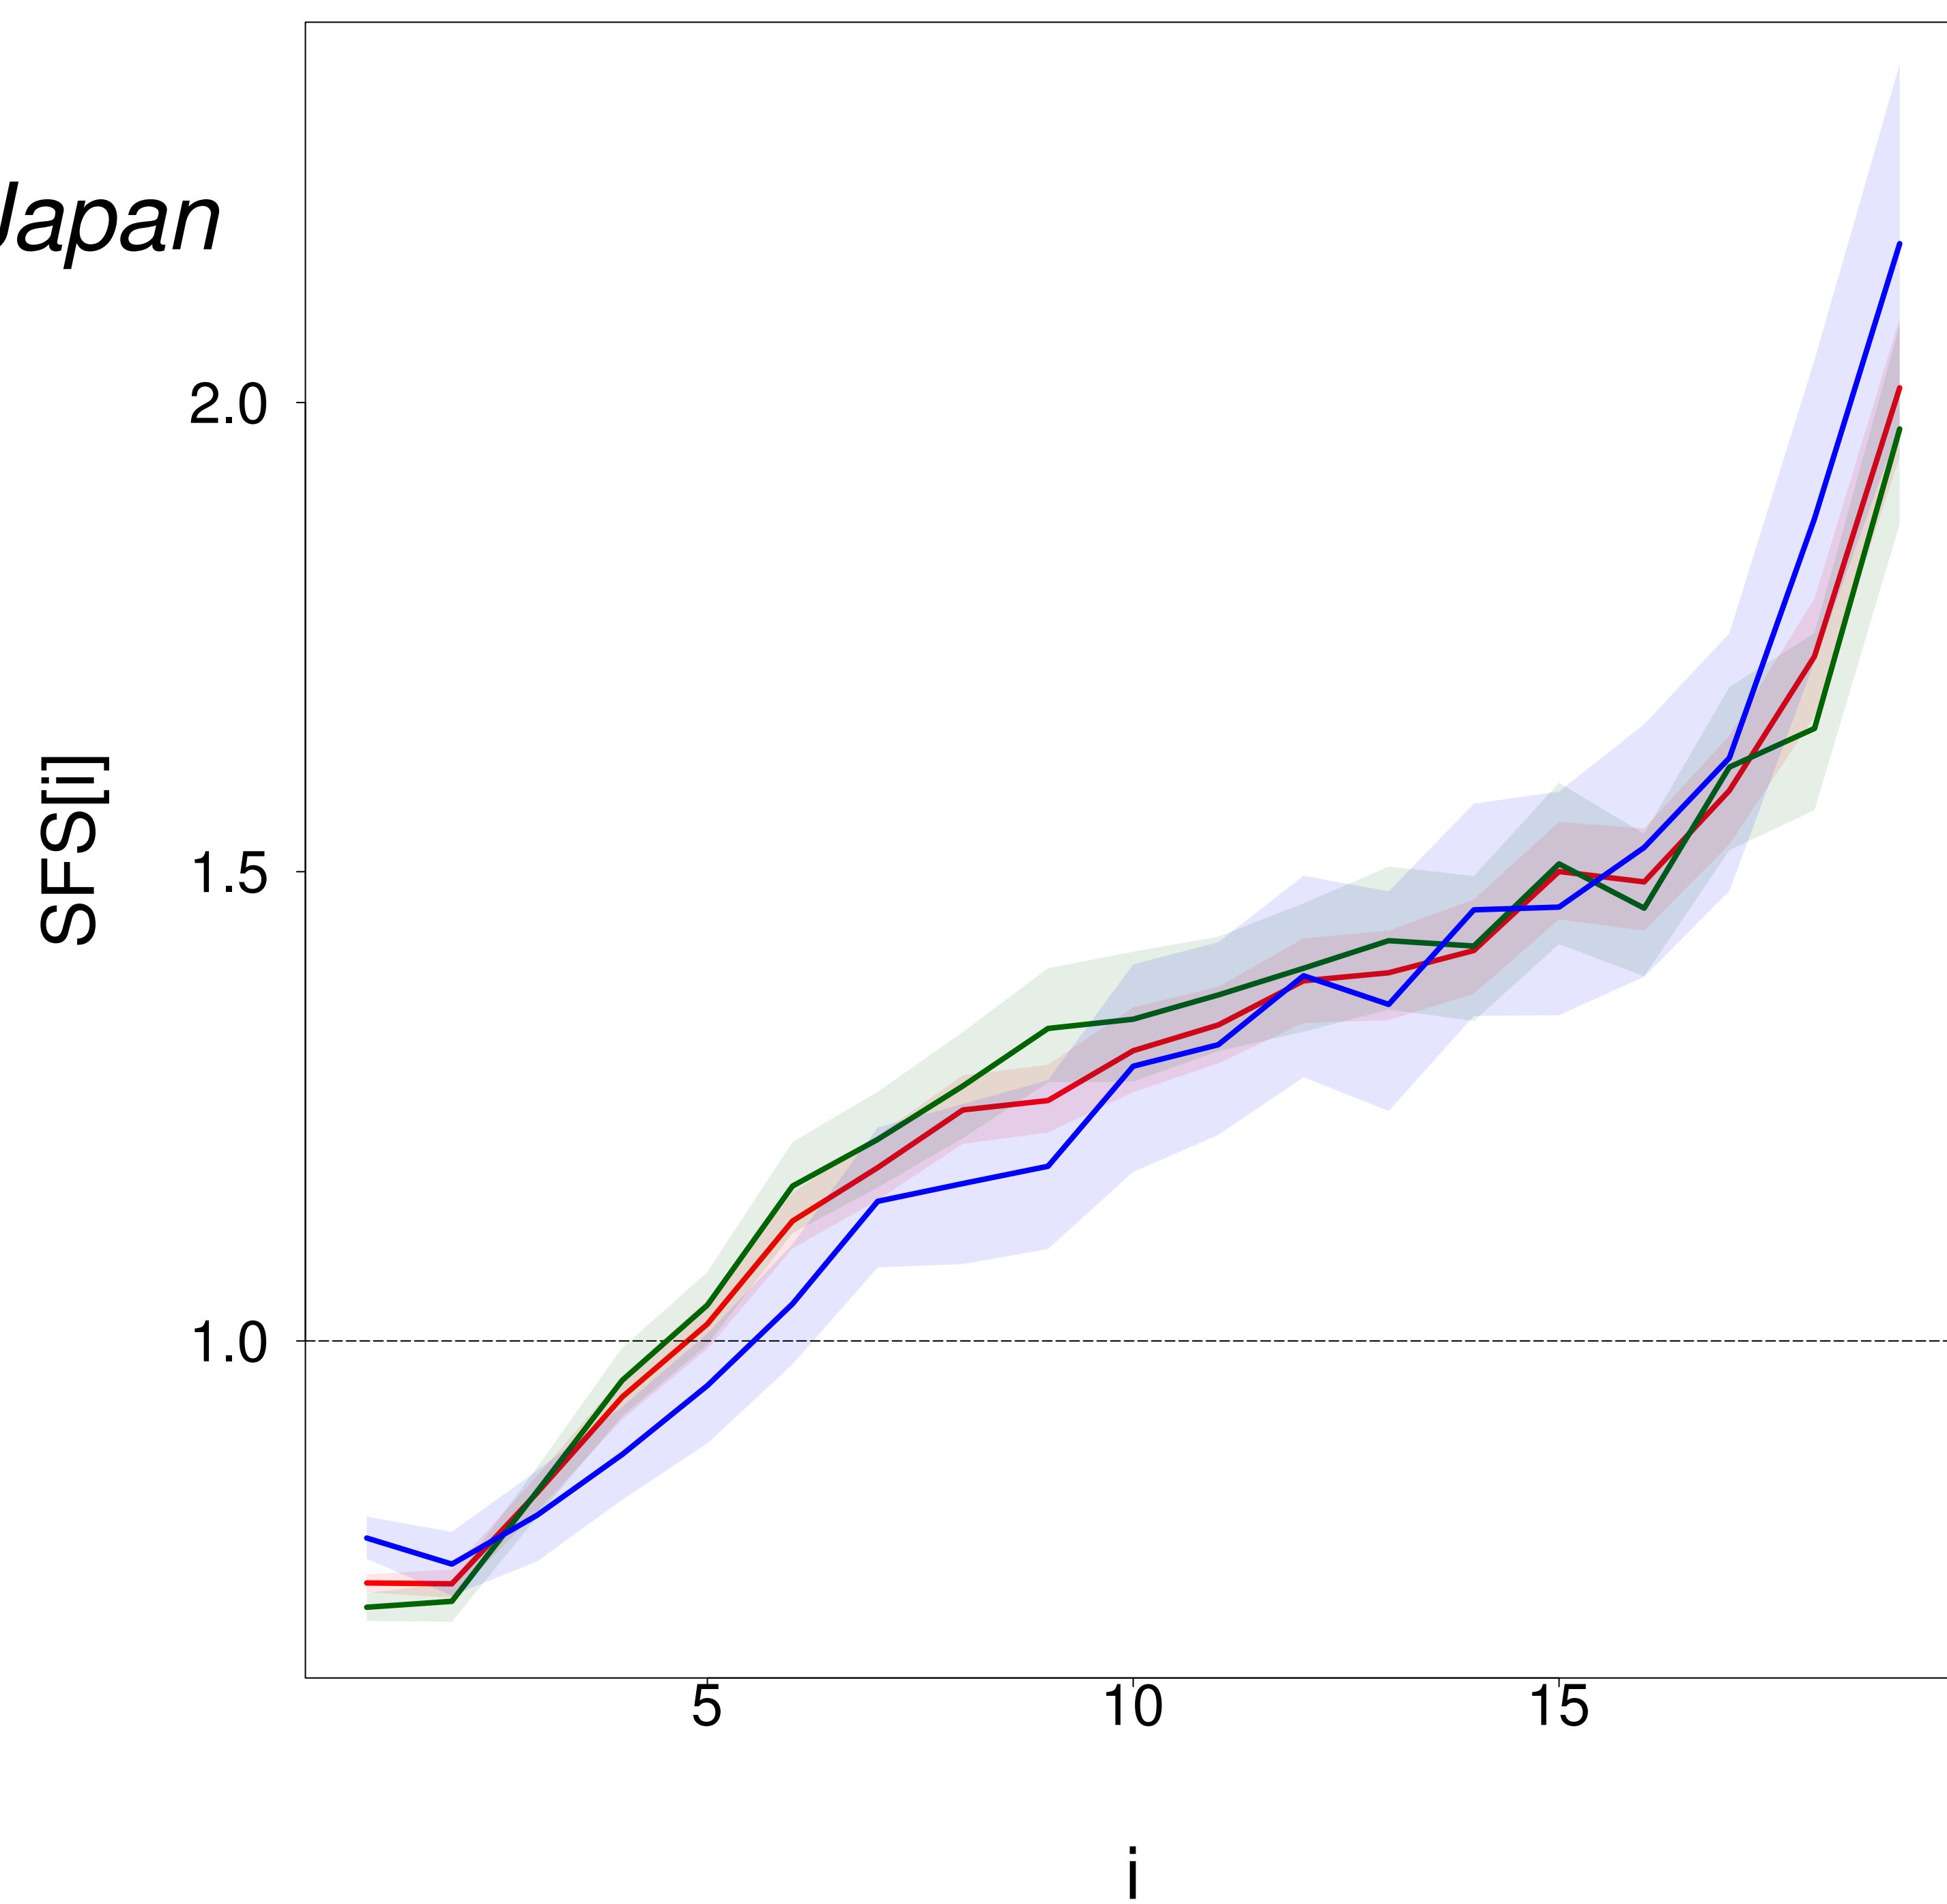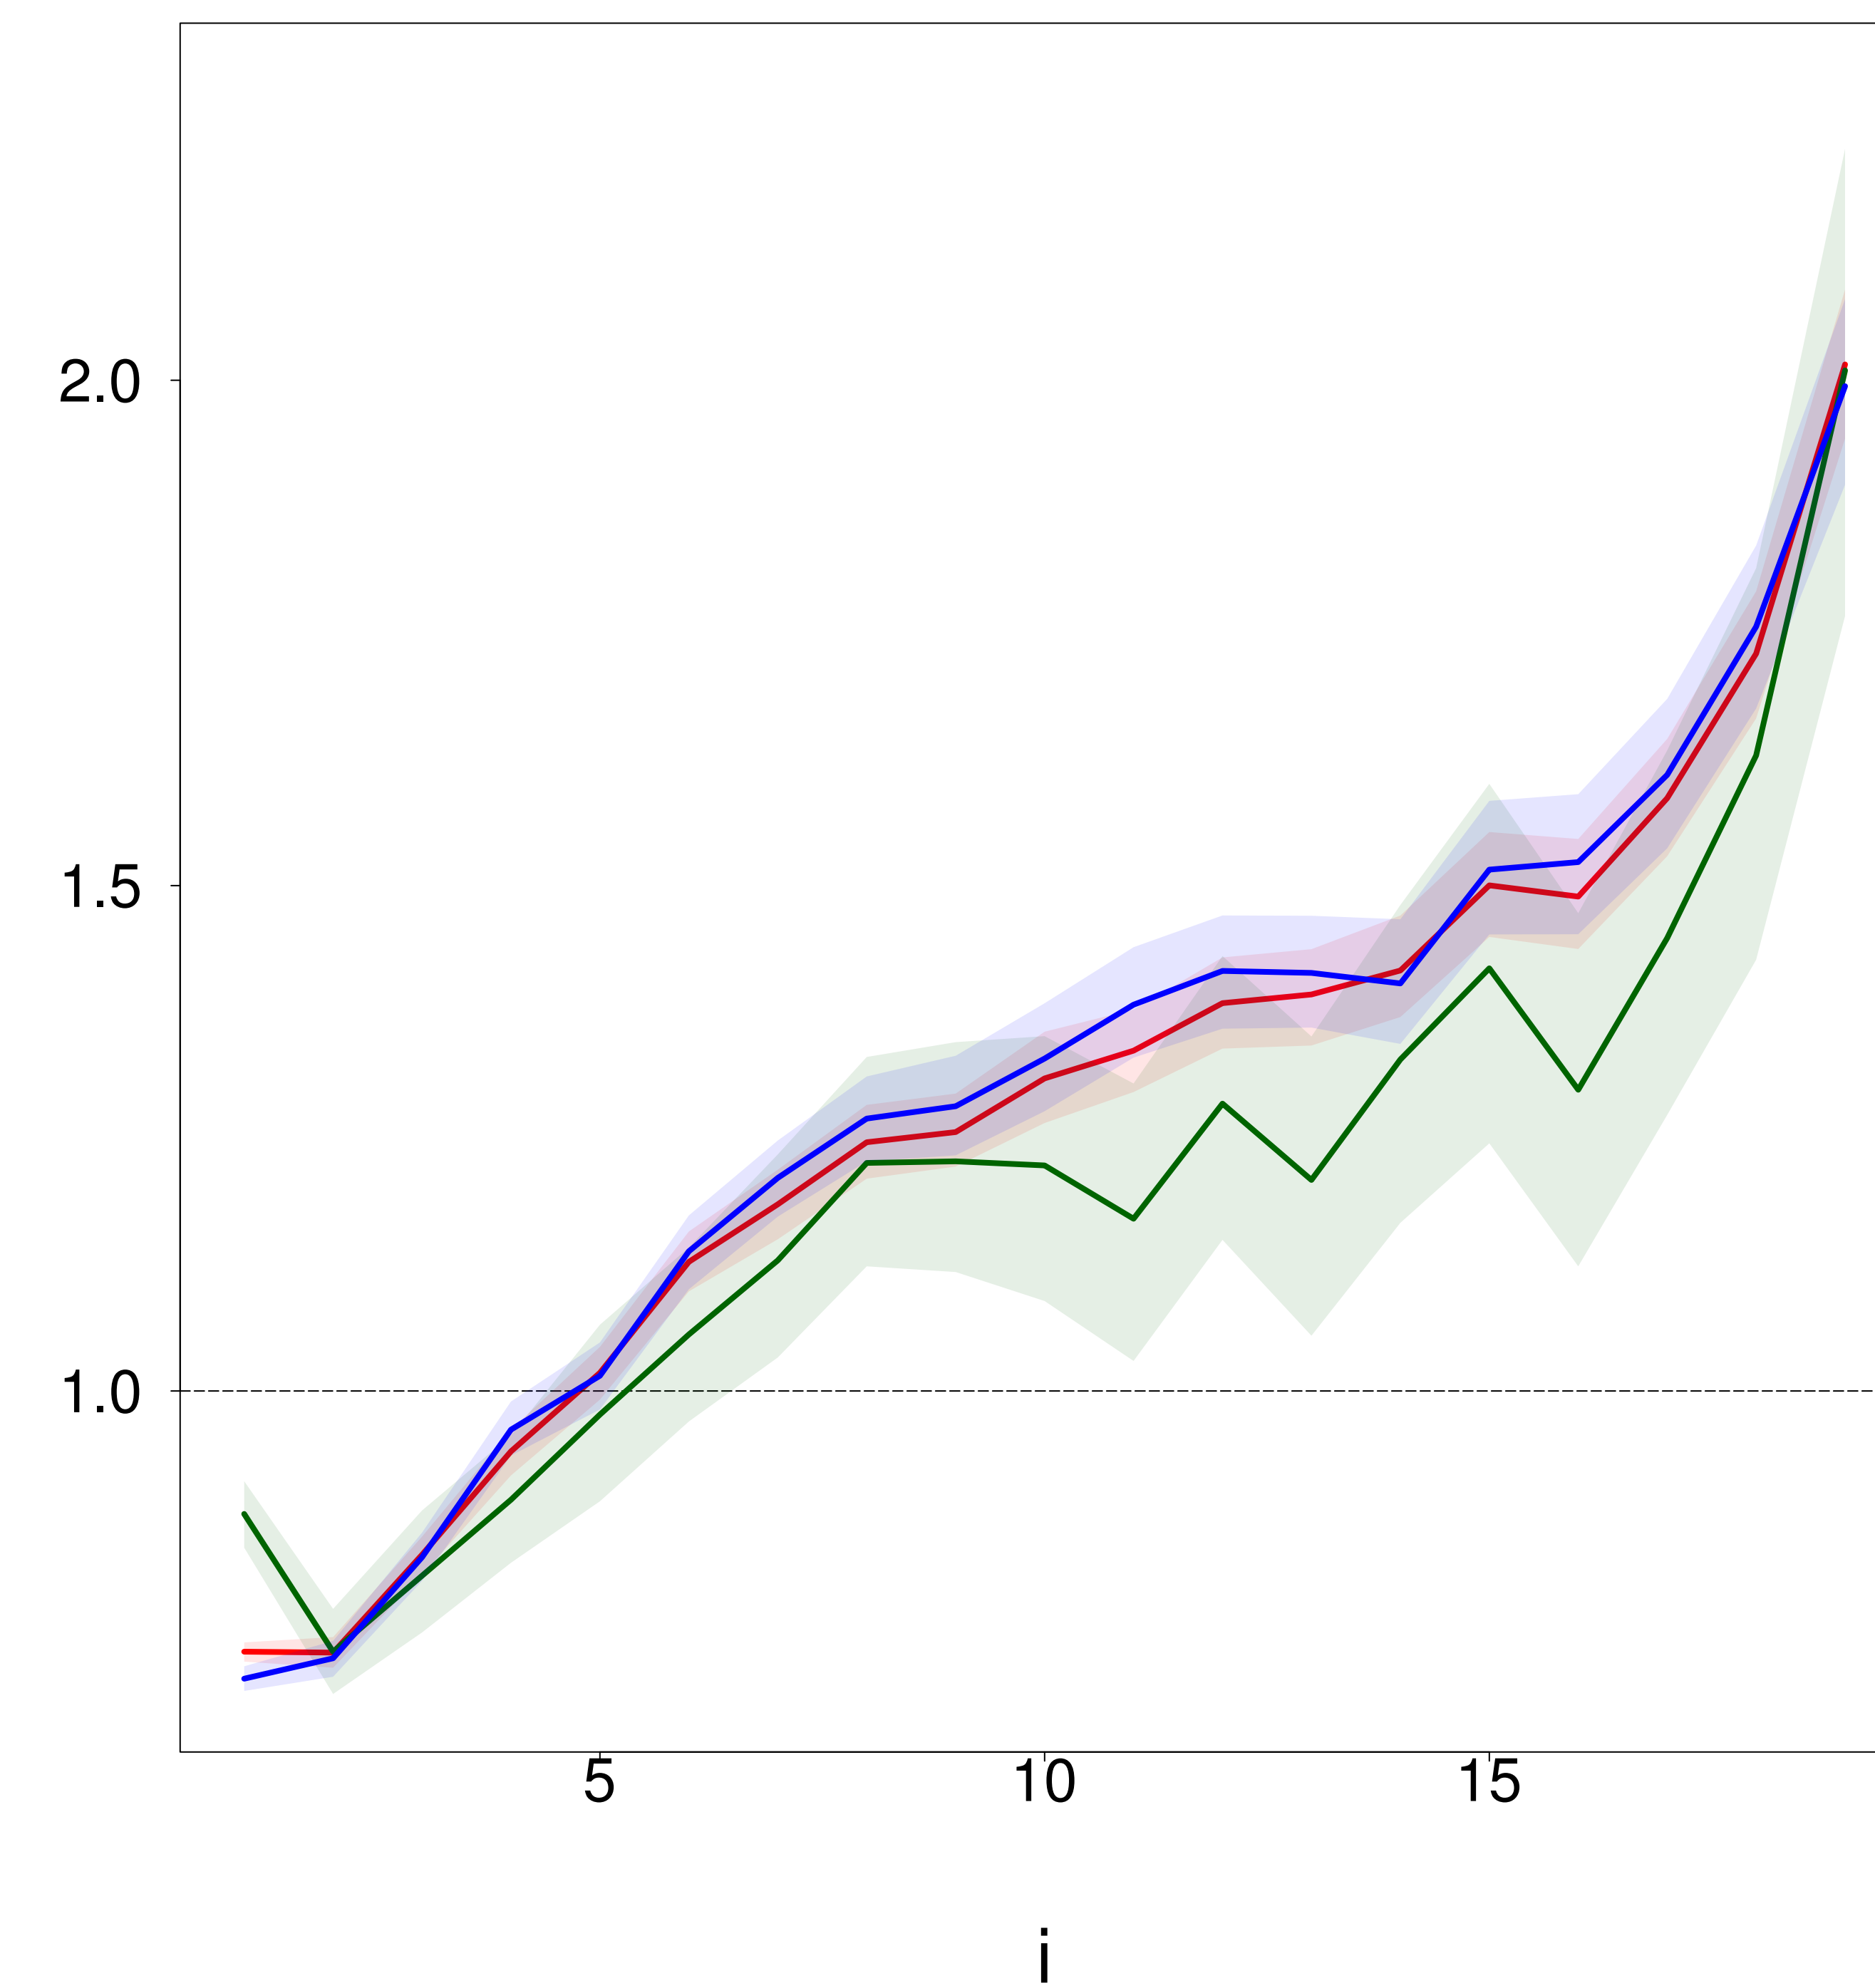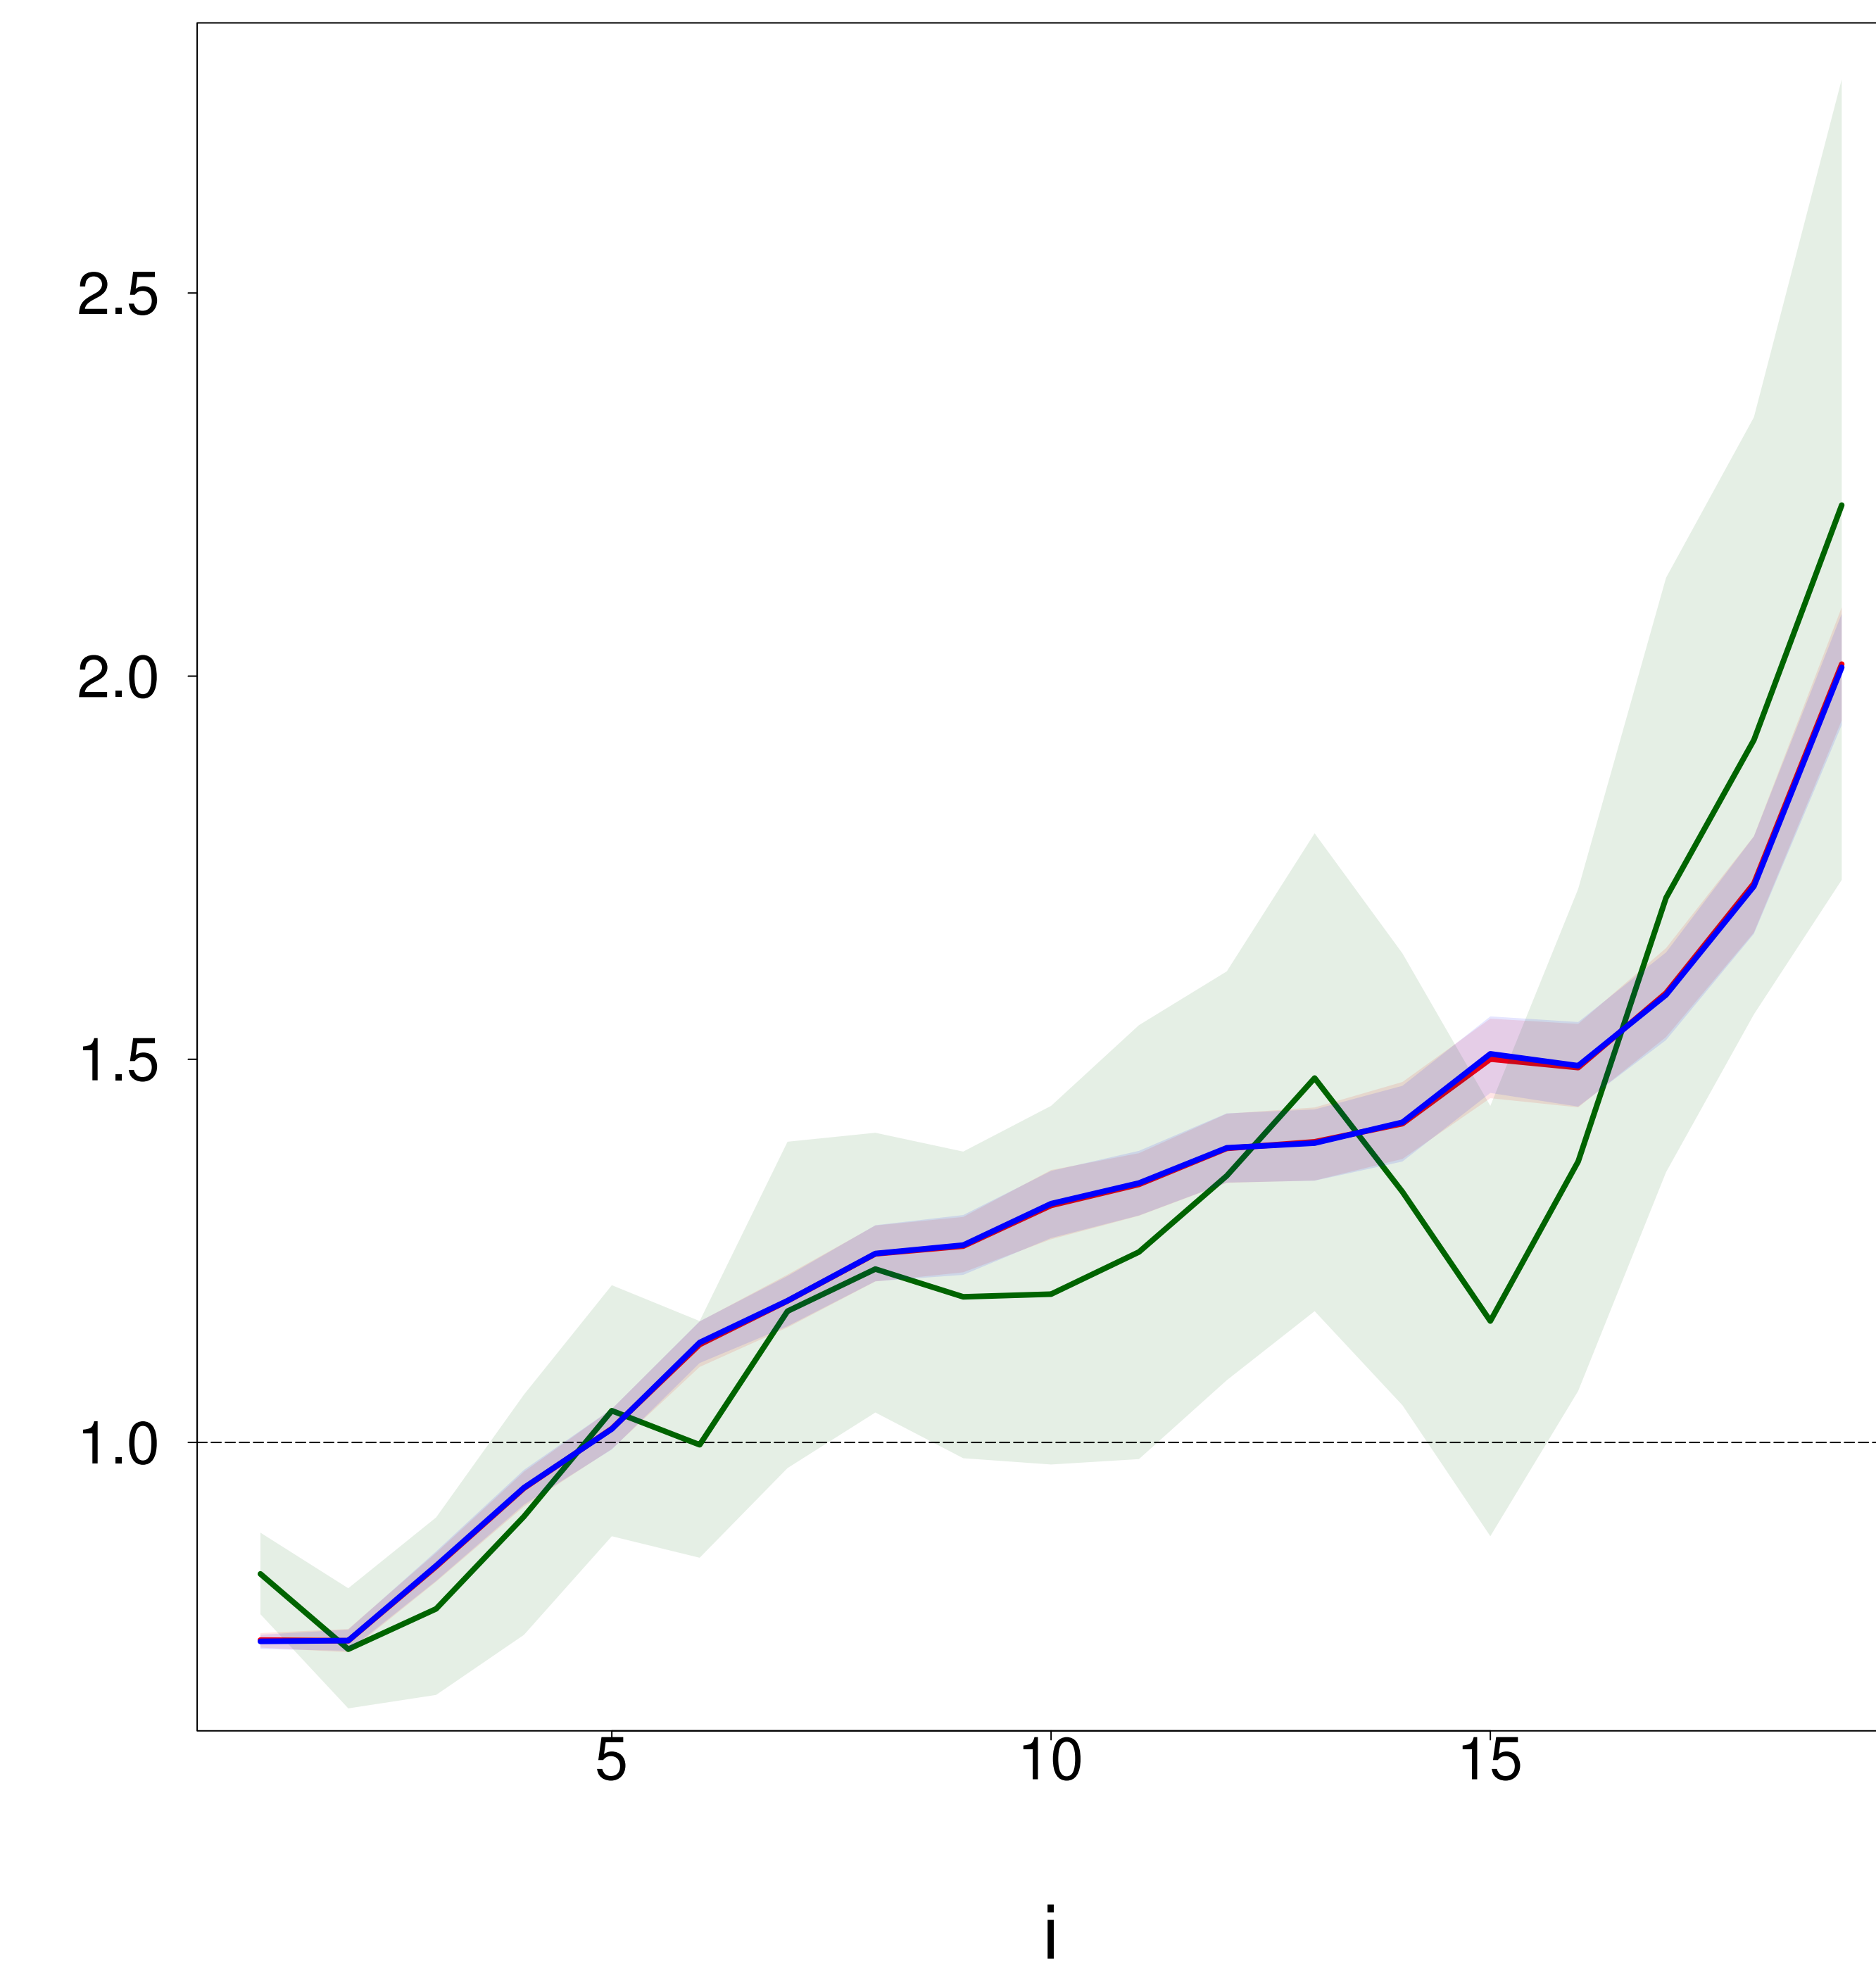

Supplement: supp [file elife-36317-supp-v2.zip]

Japan

Neutral

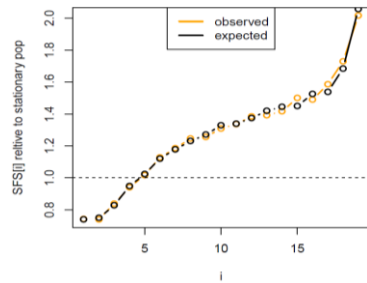

NTR-50 Kb

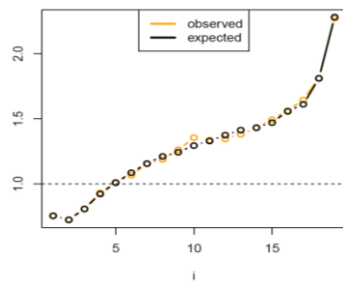

Synonymous

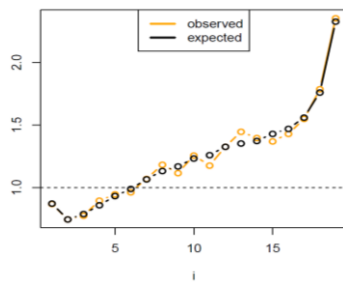

B-stat&gt;0.9

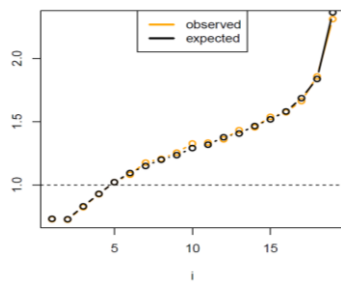

37,574 1 Kb regions

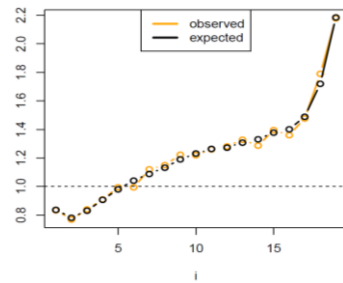

Yoruba

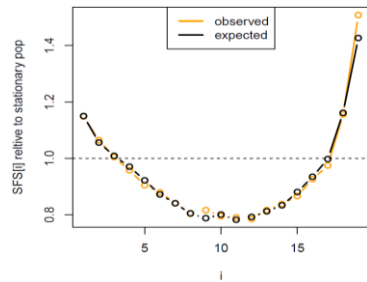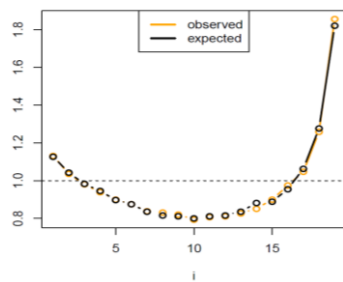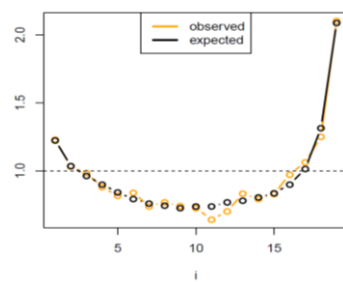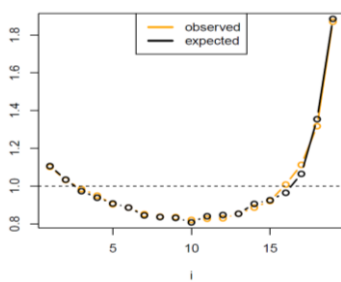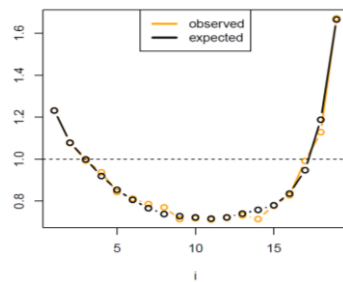

Supplement: supp [file elife-36317-supp-v2.zip]

**A****All SNPs**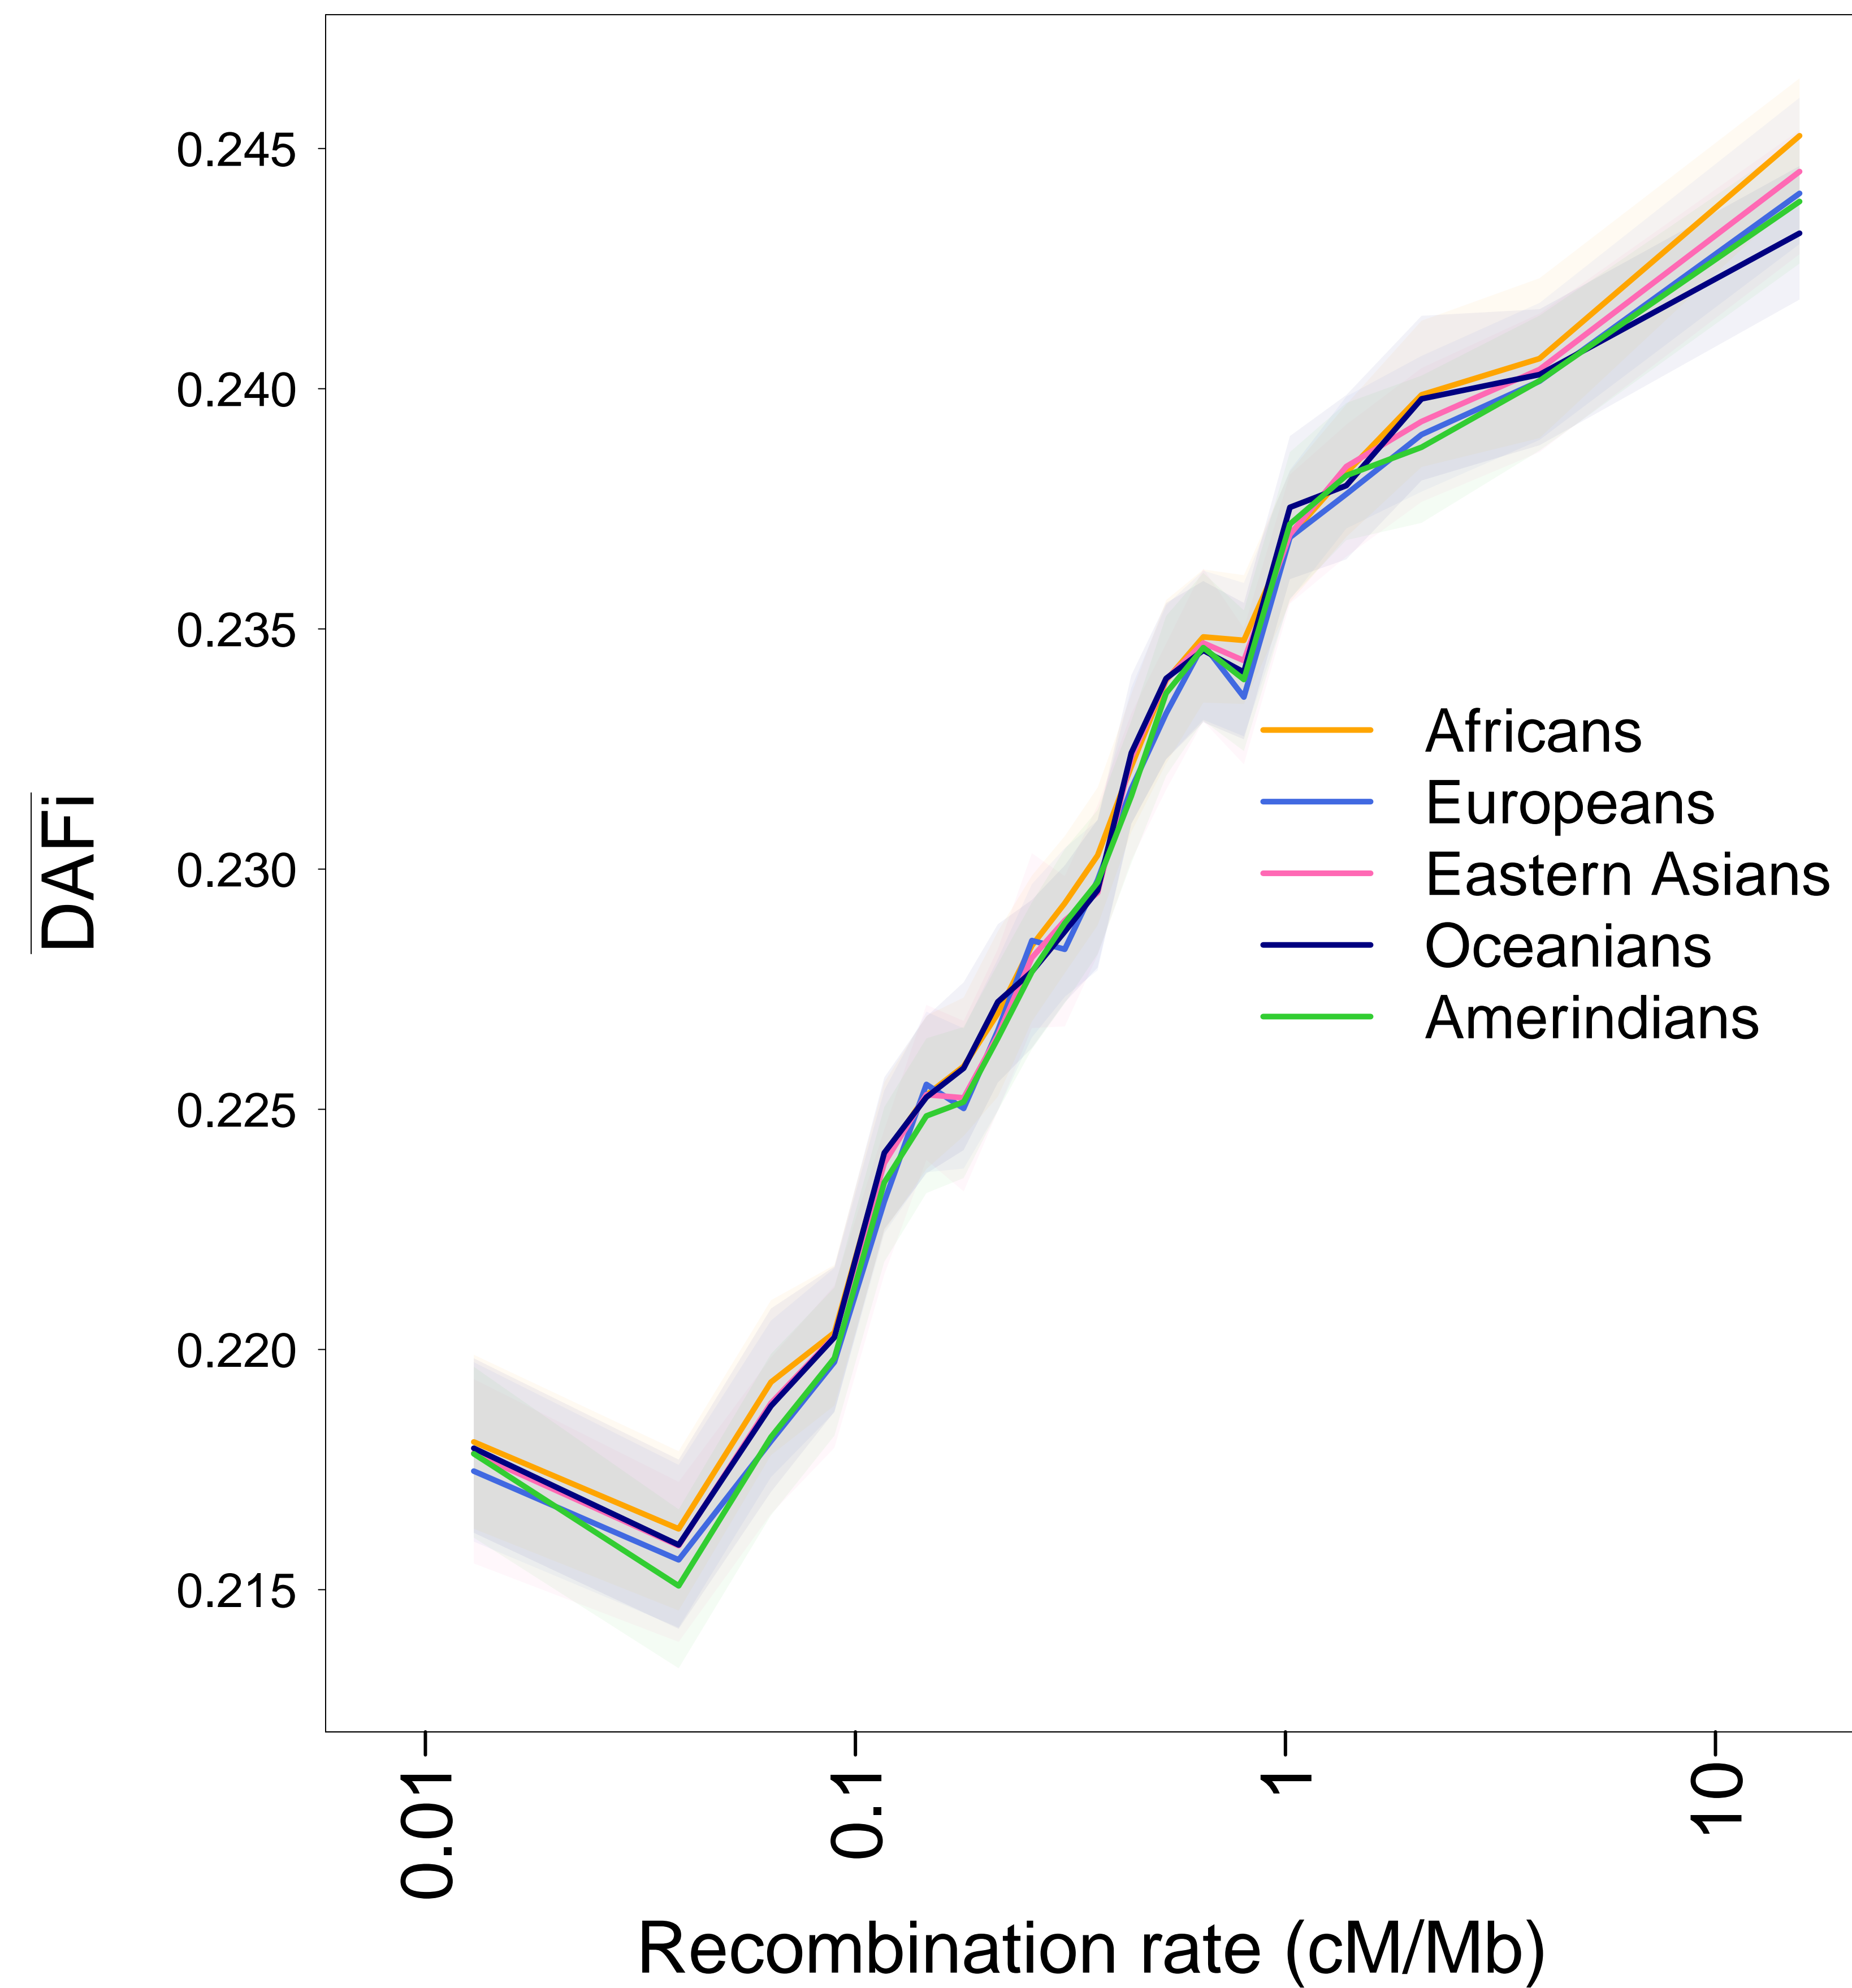**B****TR**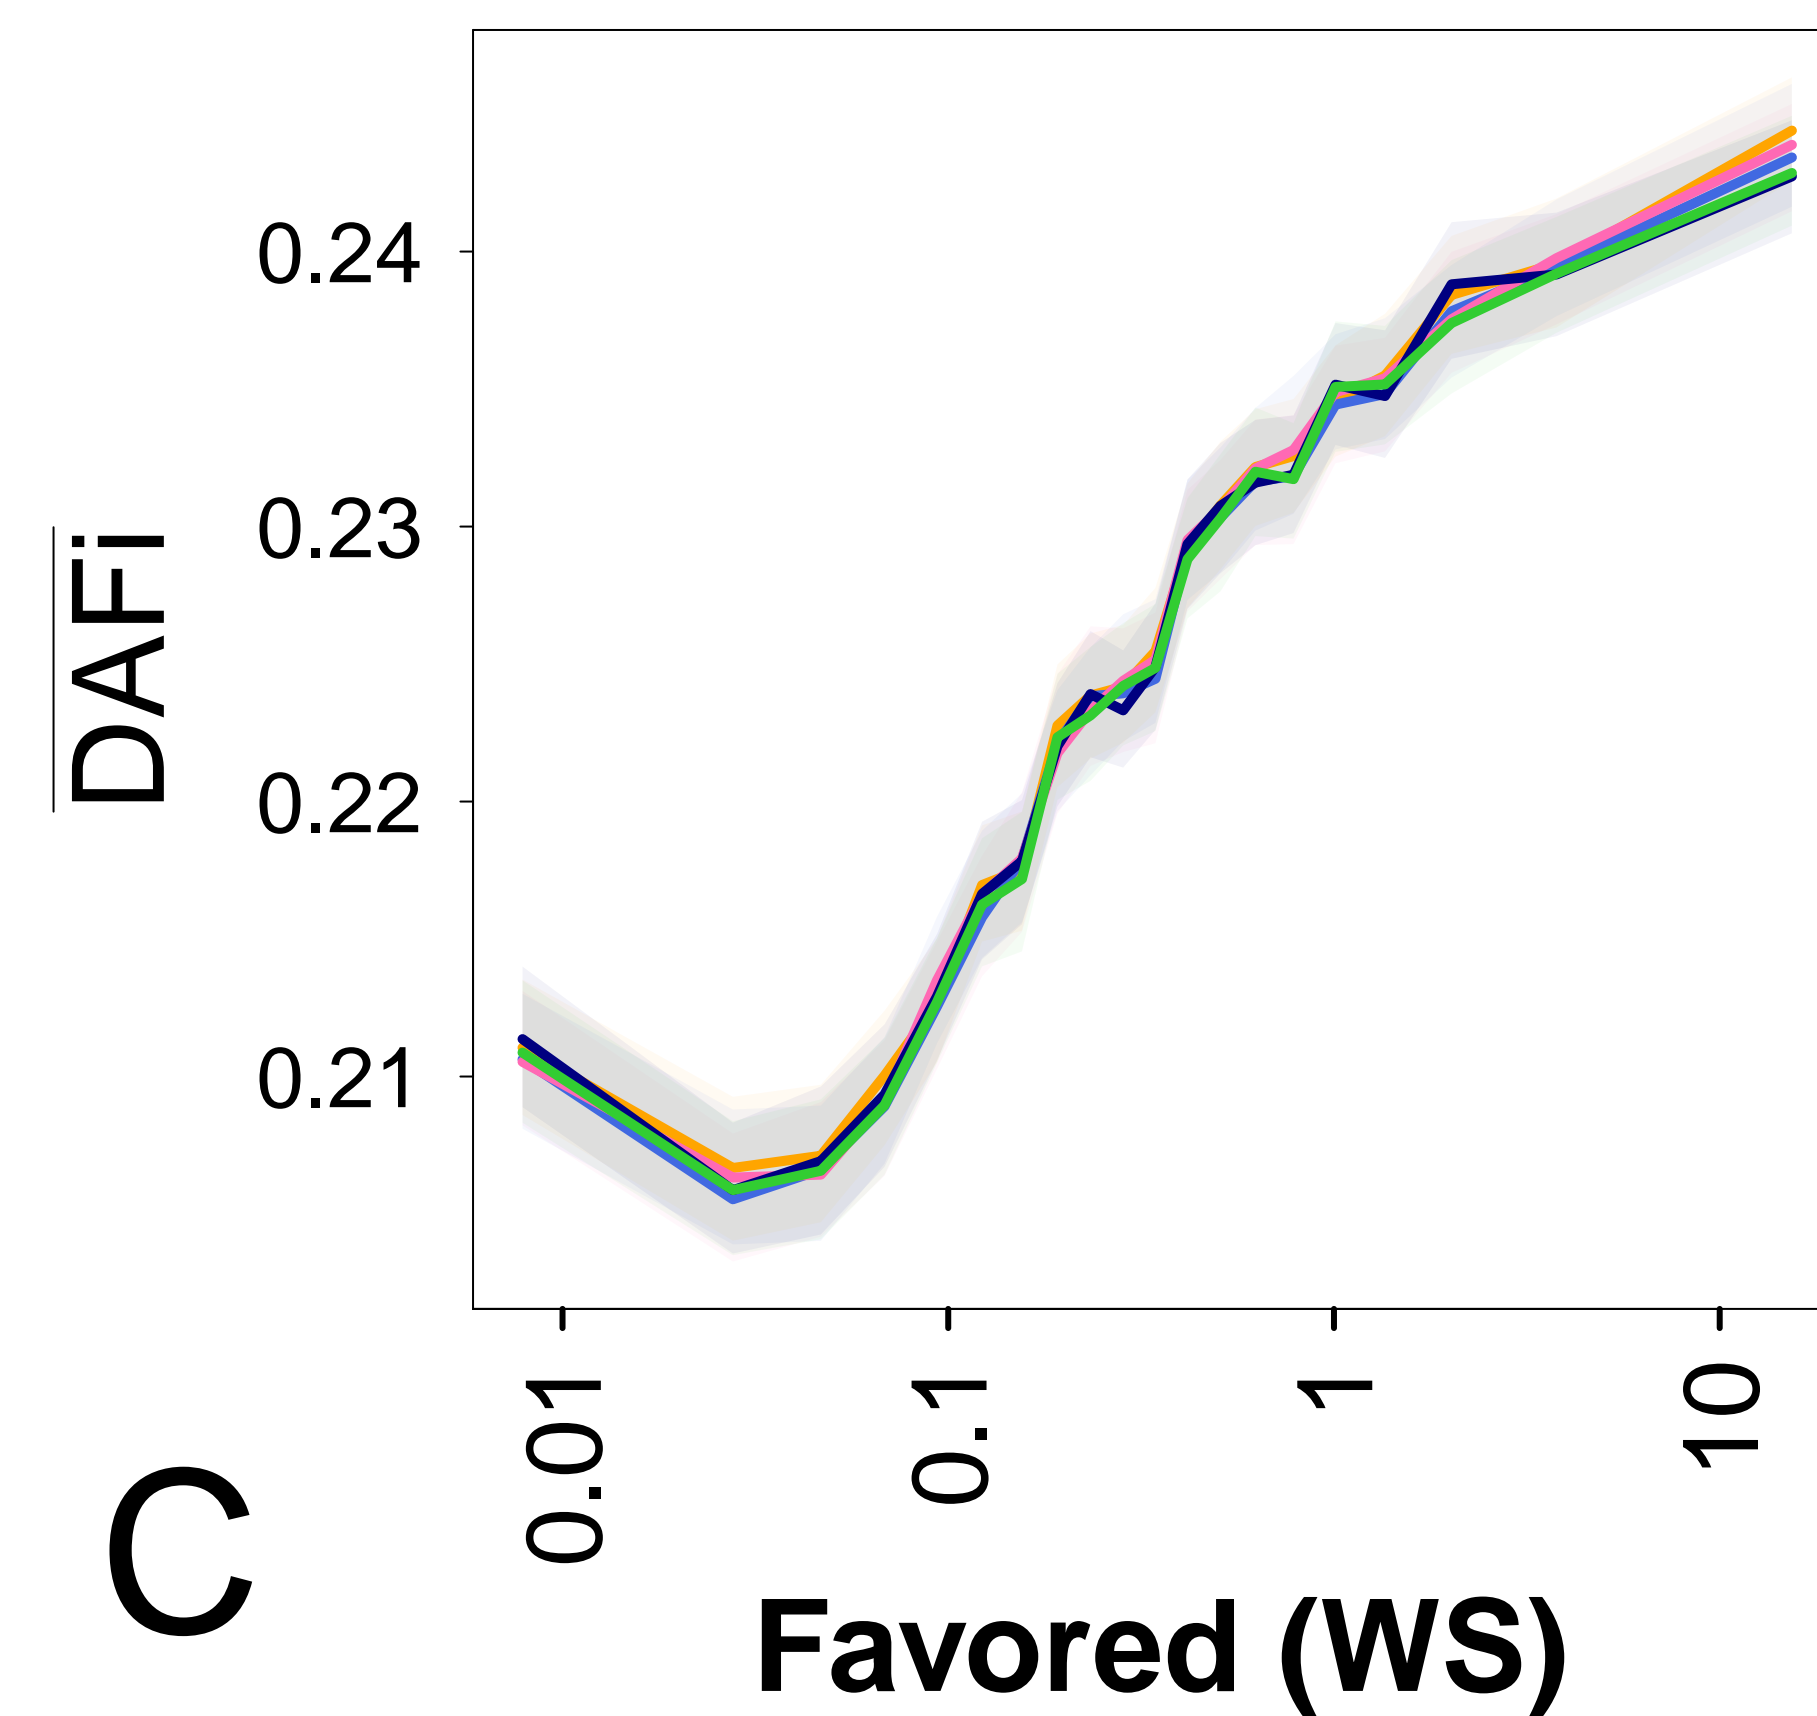**NTR**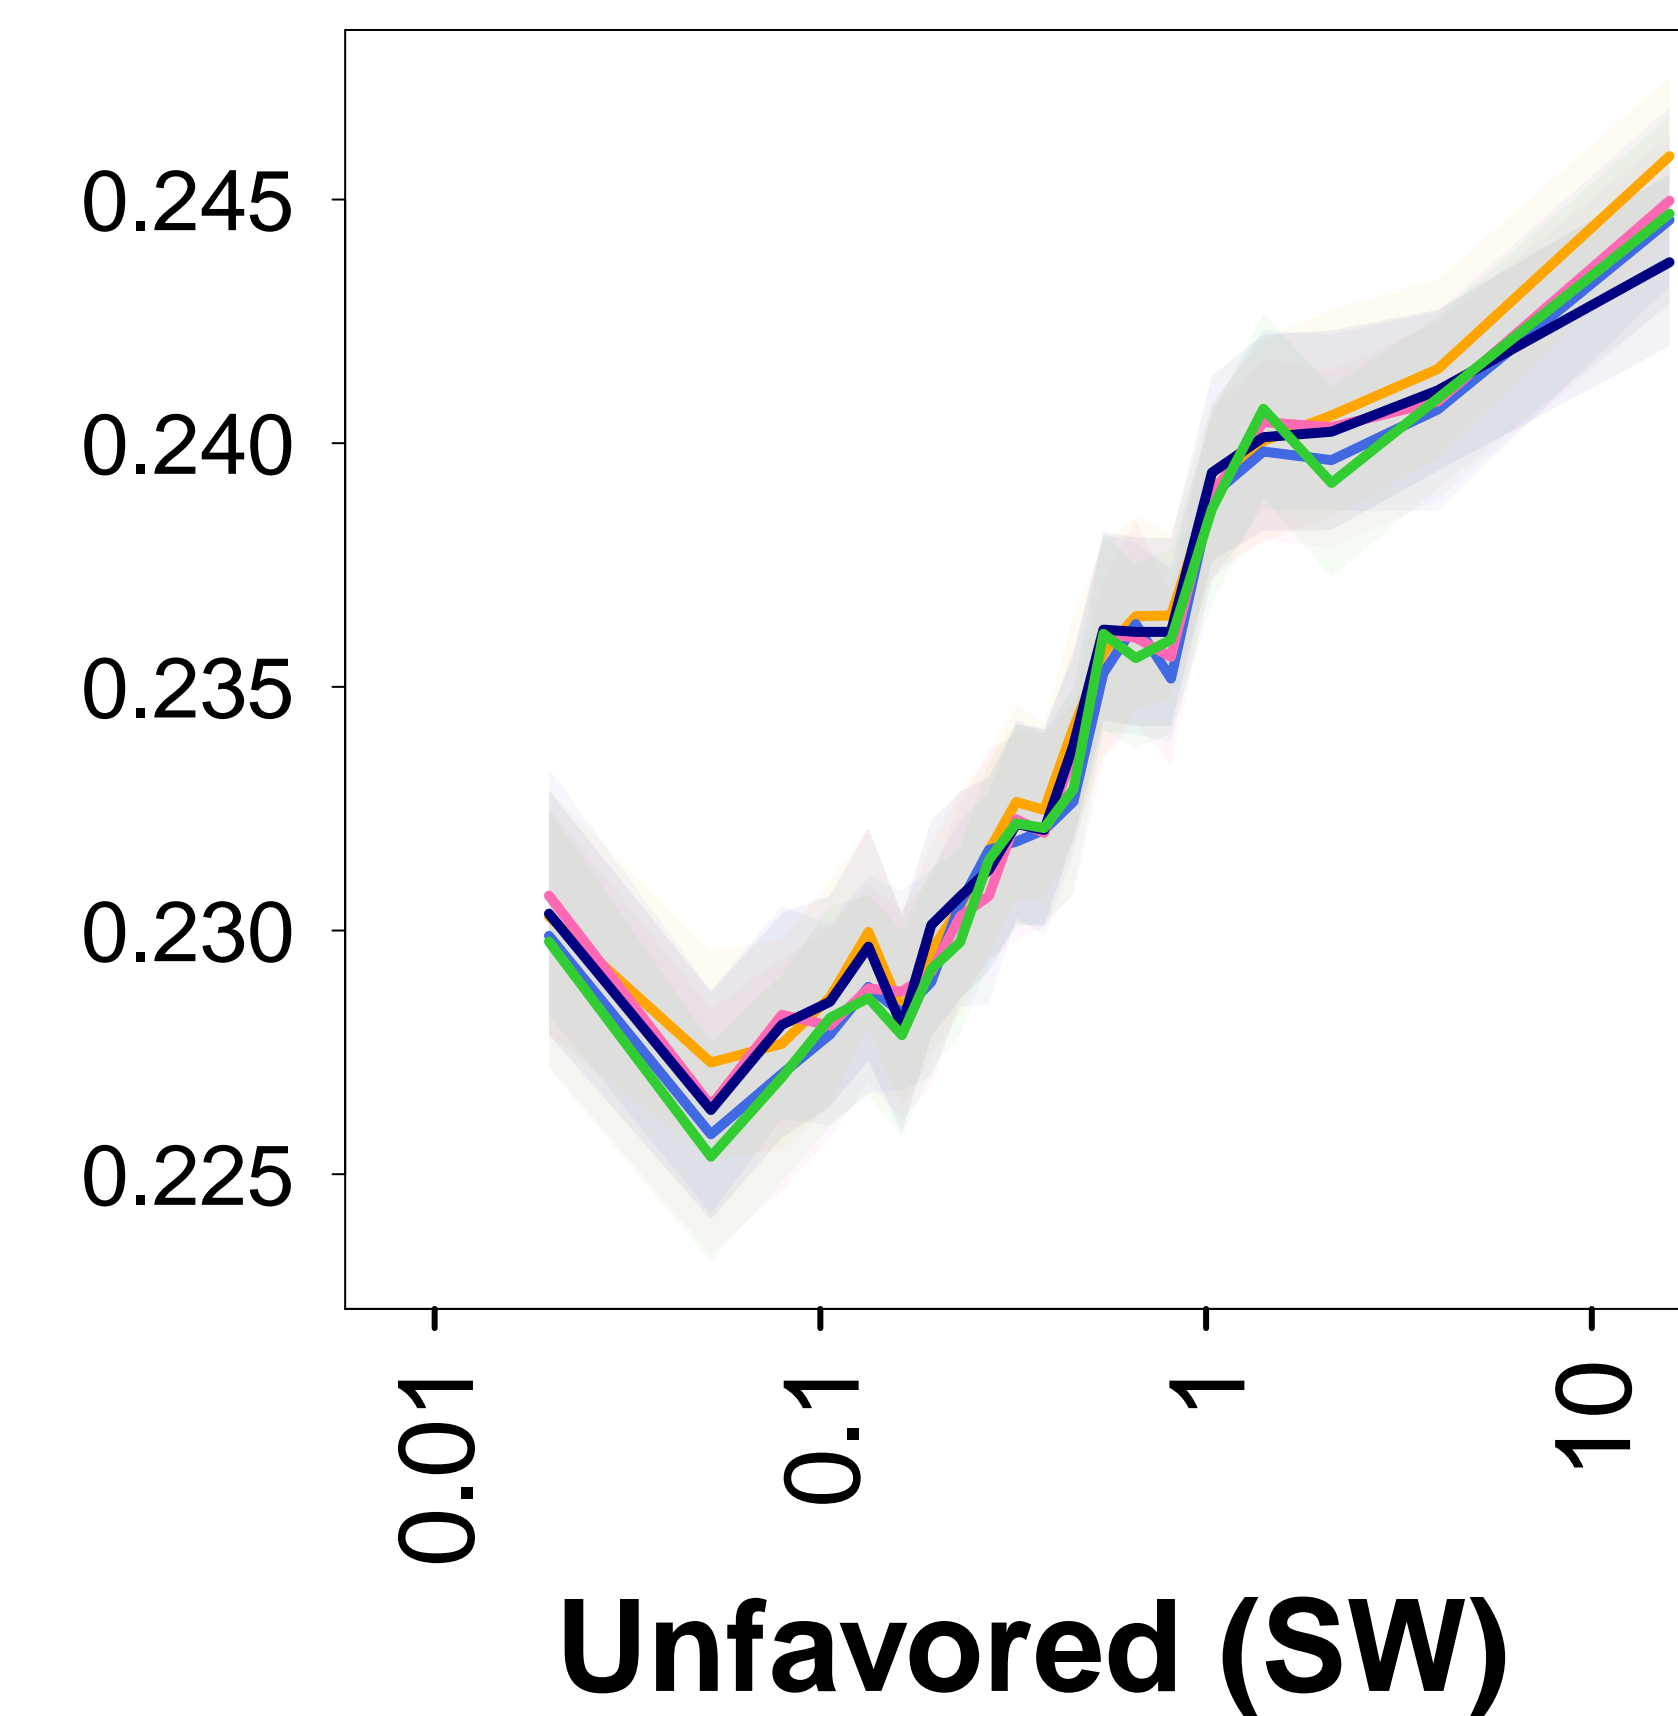**NTR-50kb**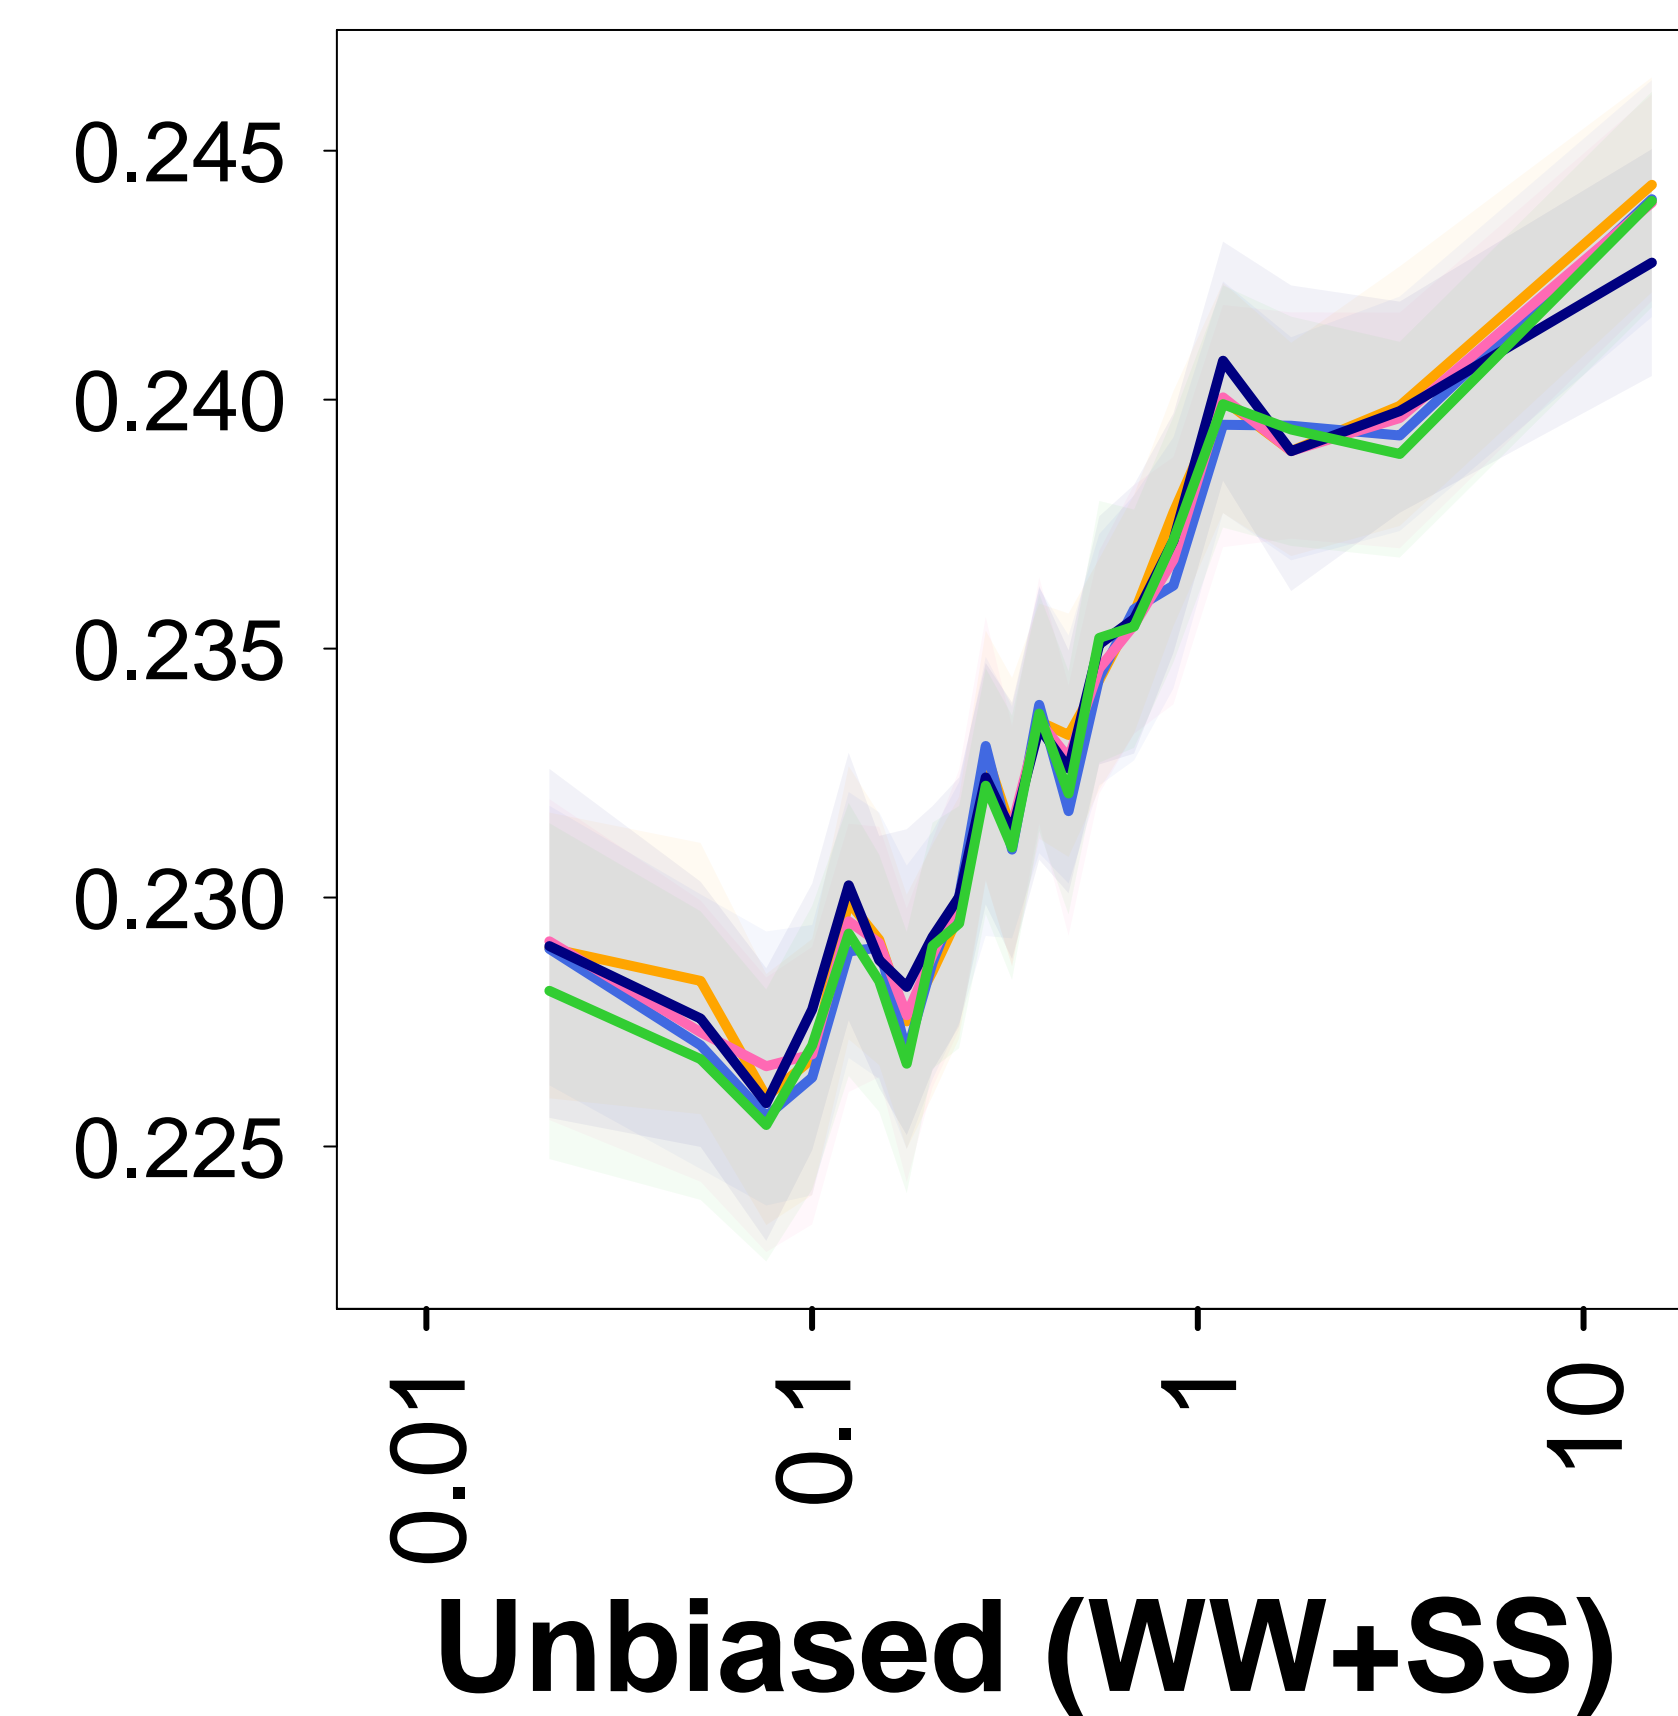**C****Favored (WS)**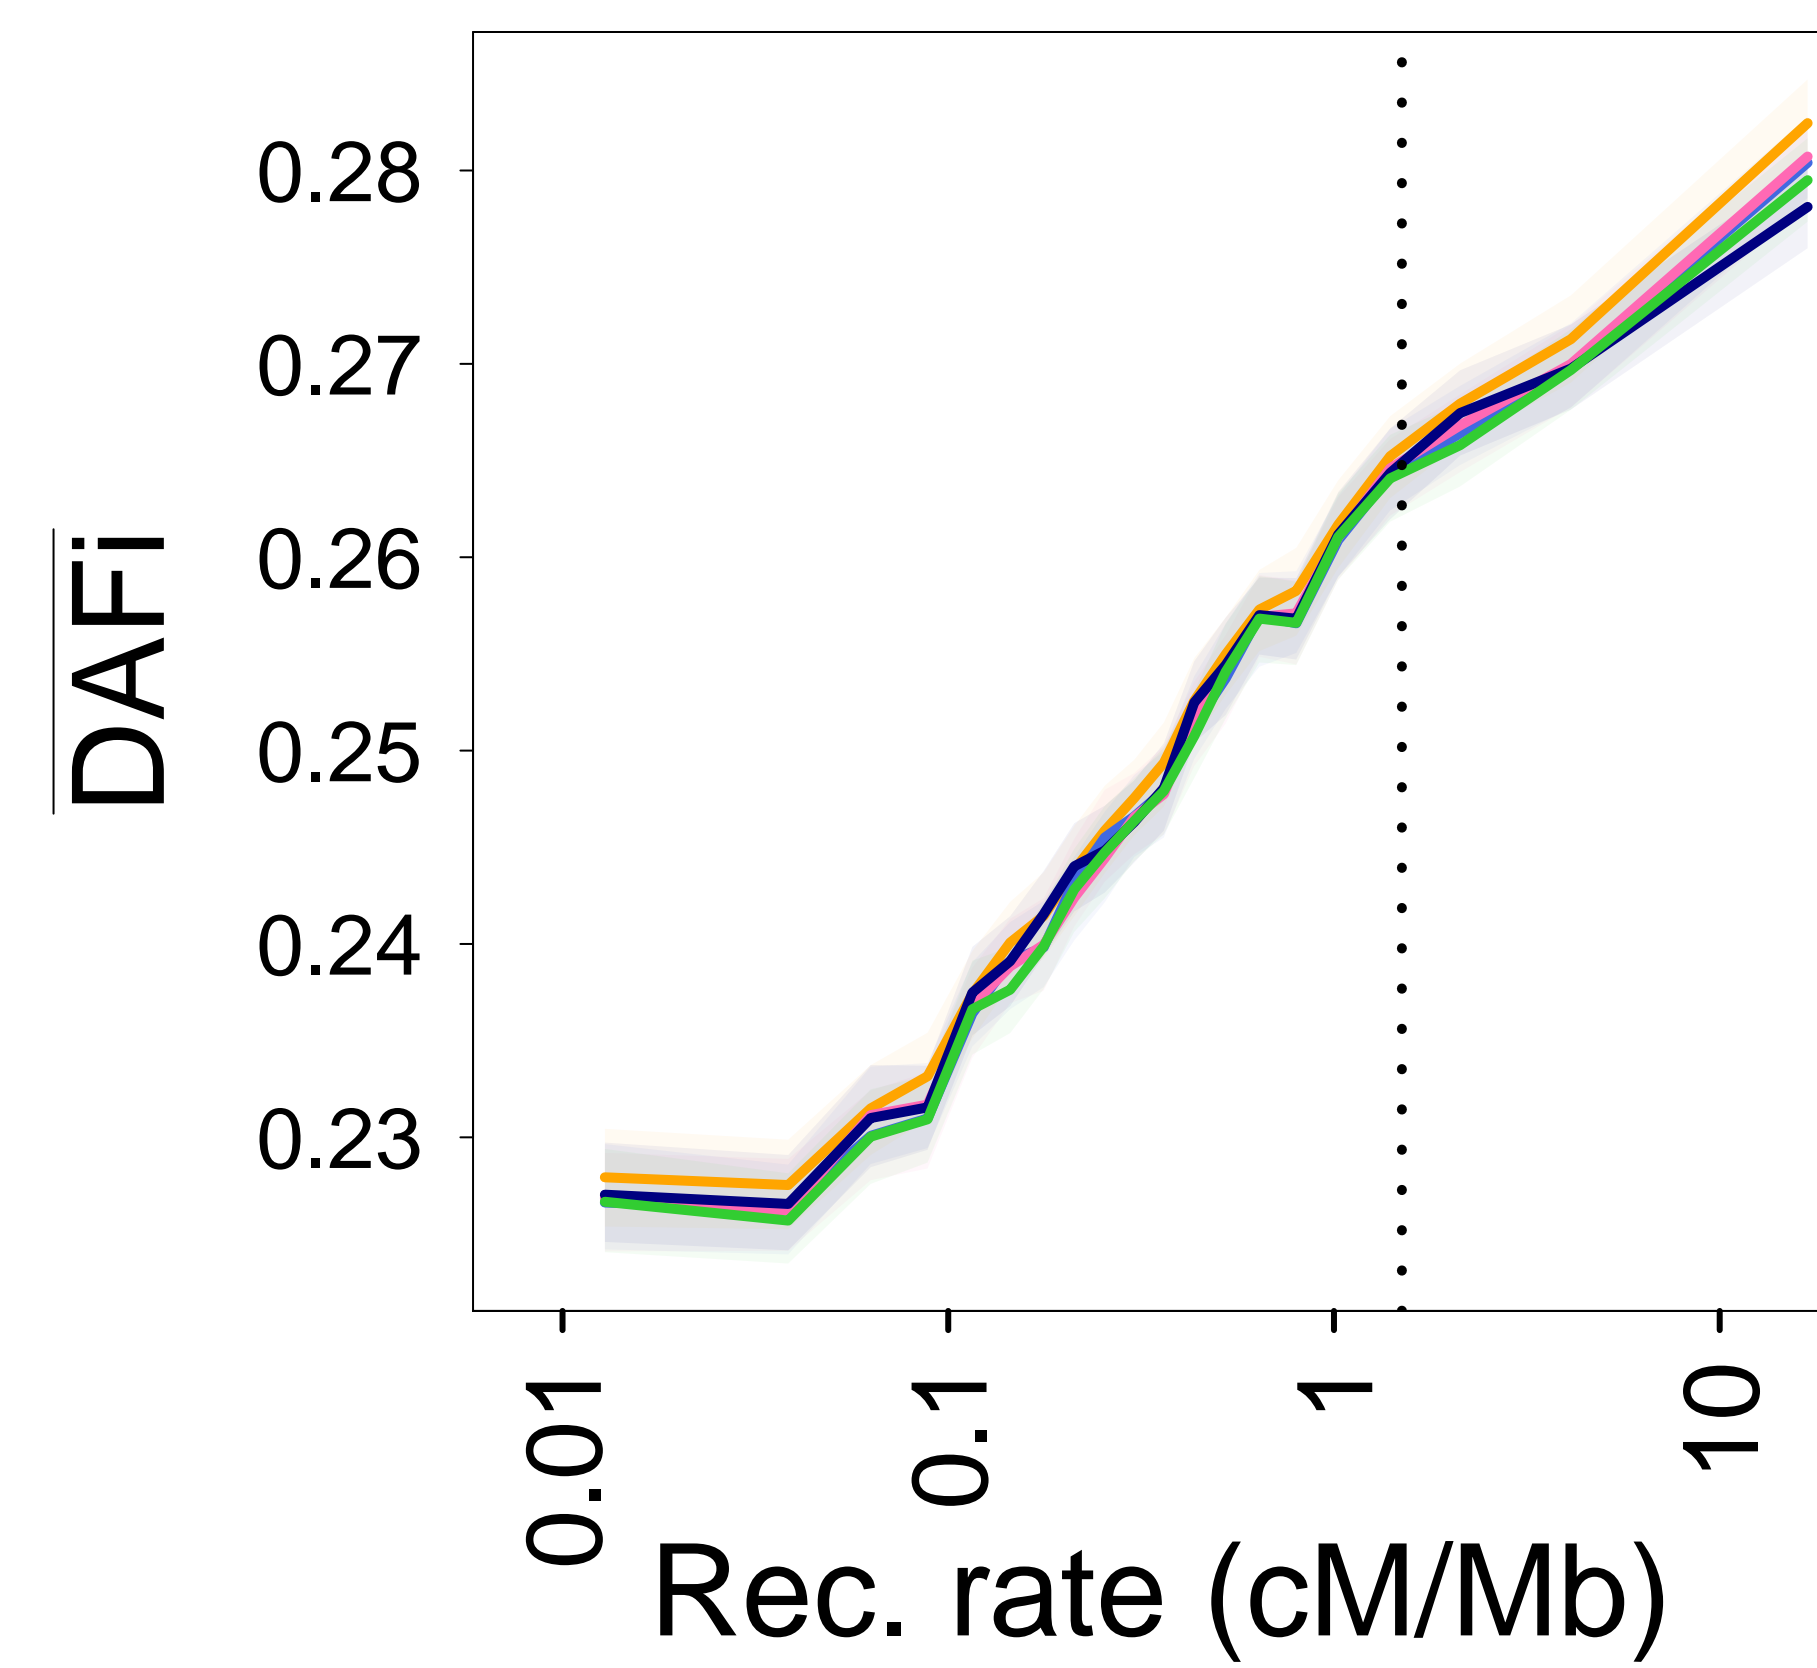**Unfavored (SW)**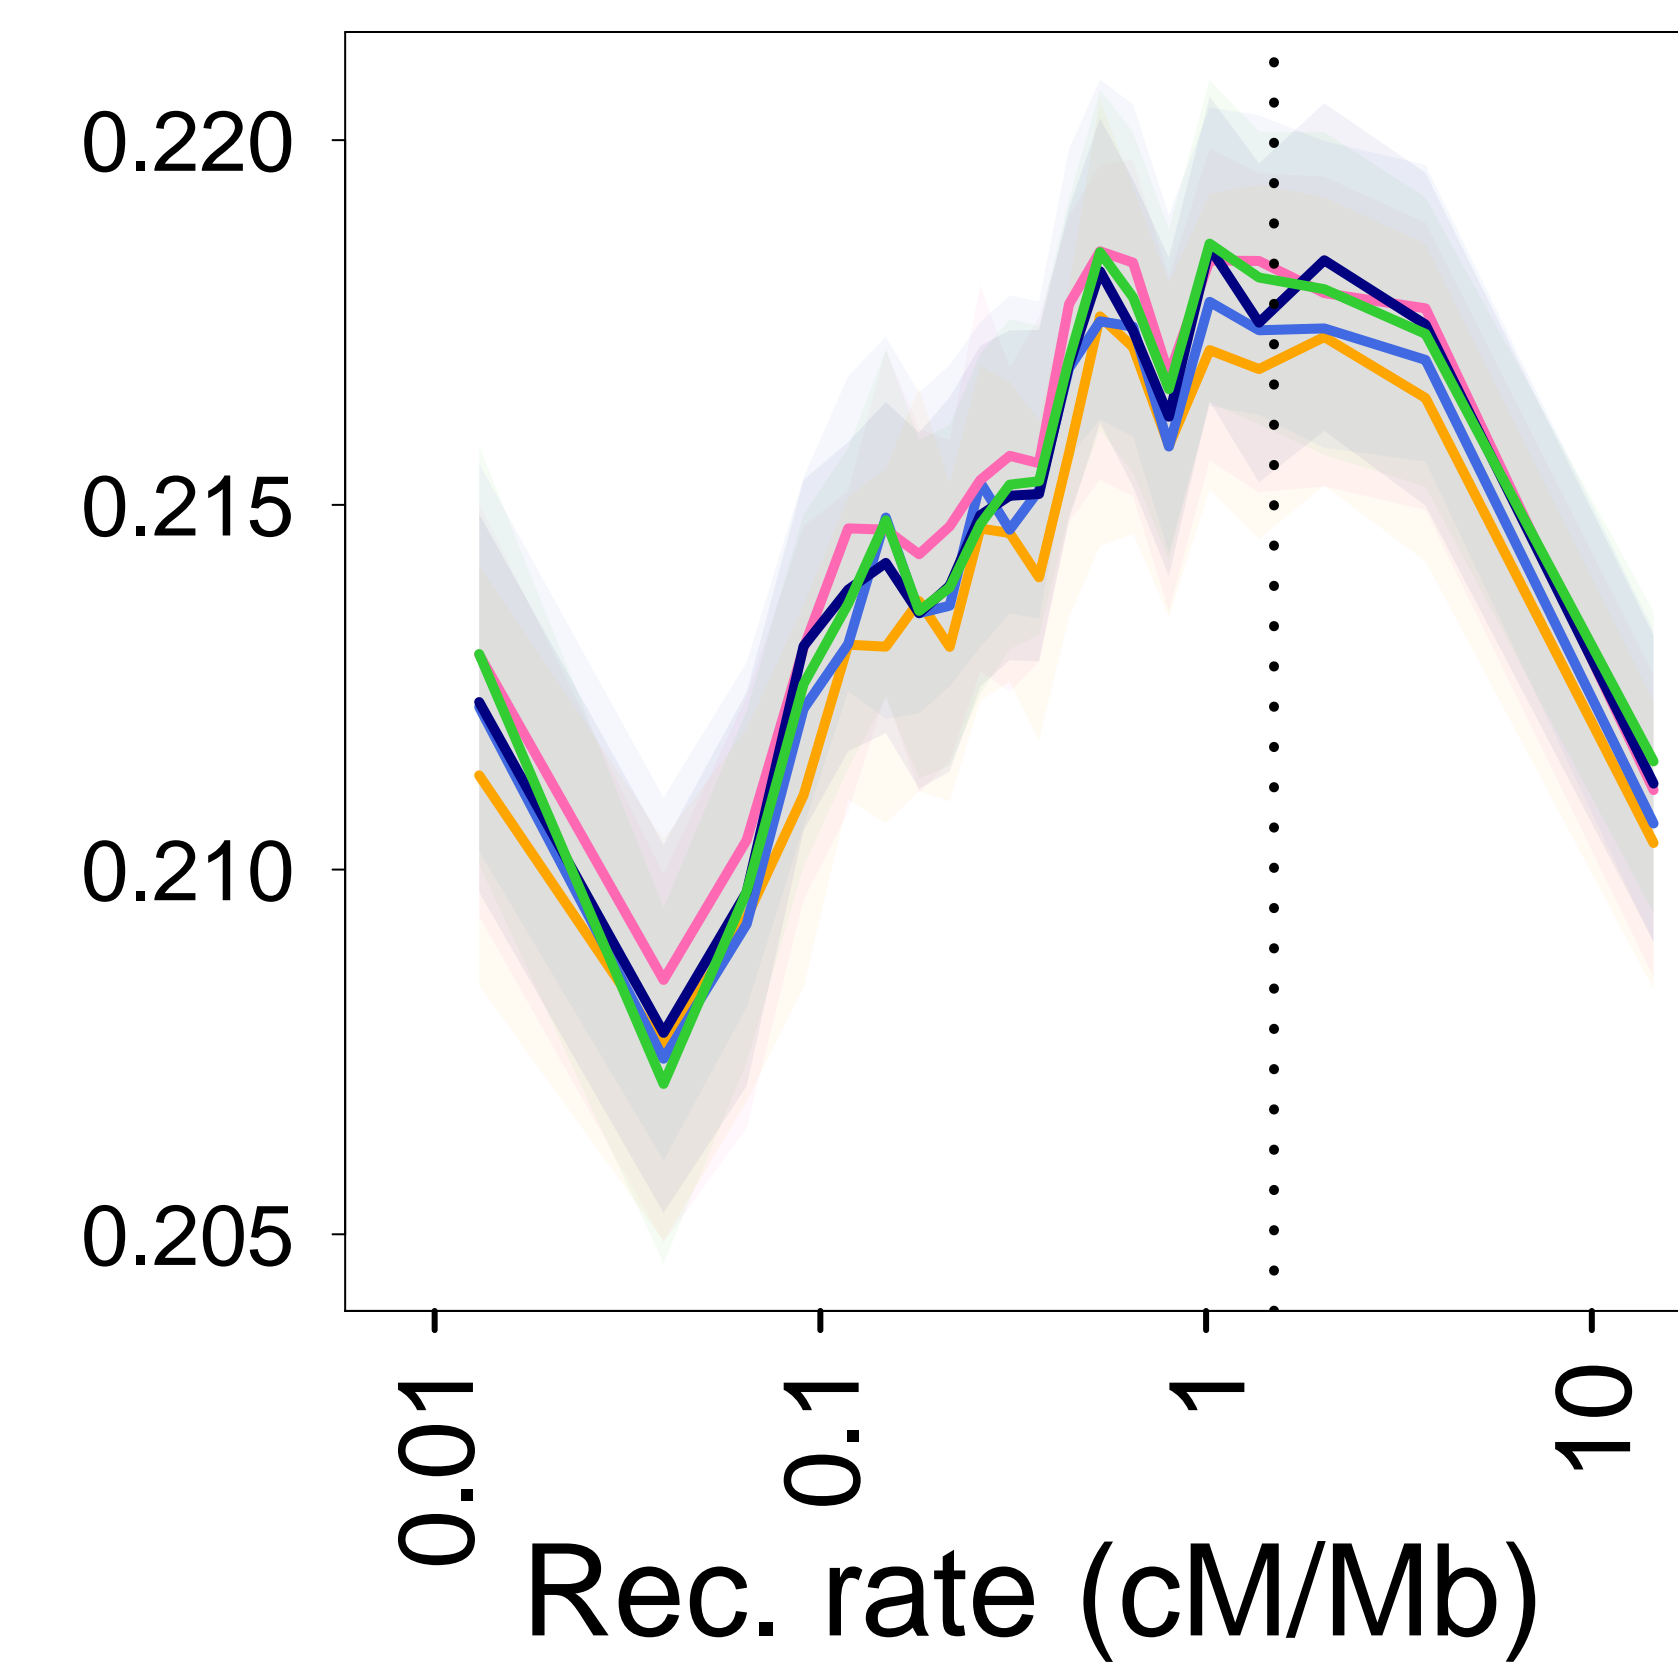**Unbiased (WW+SS)**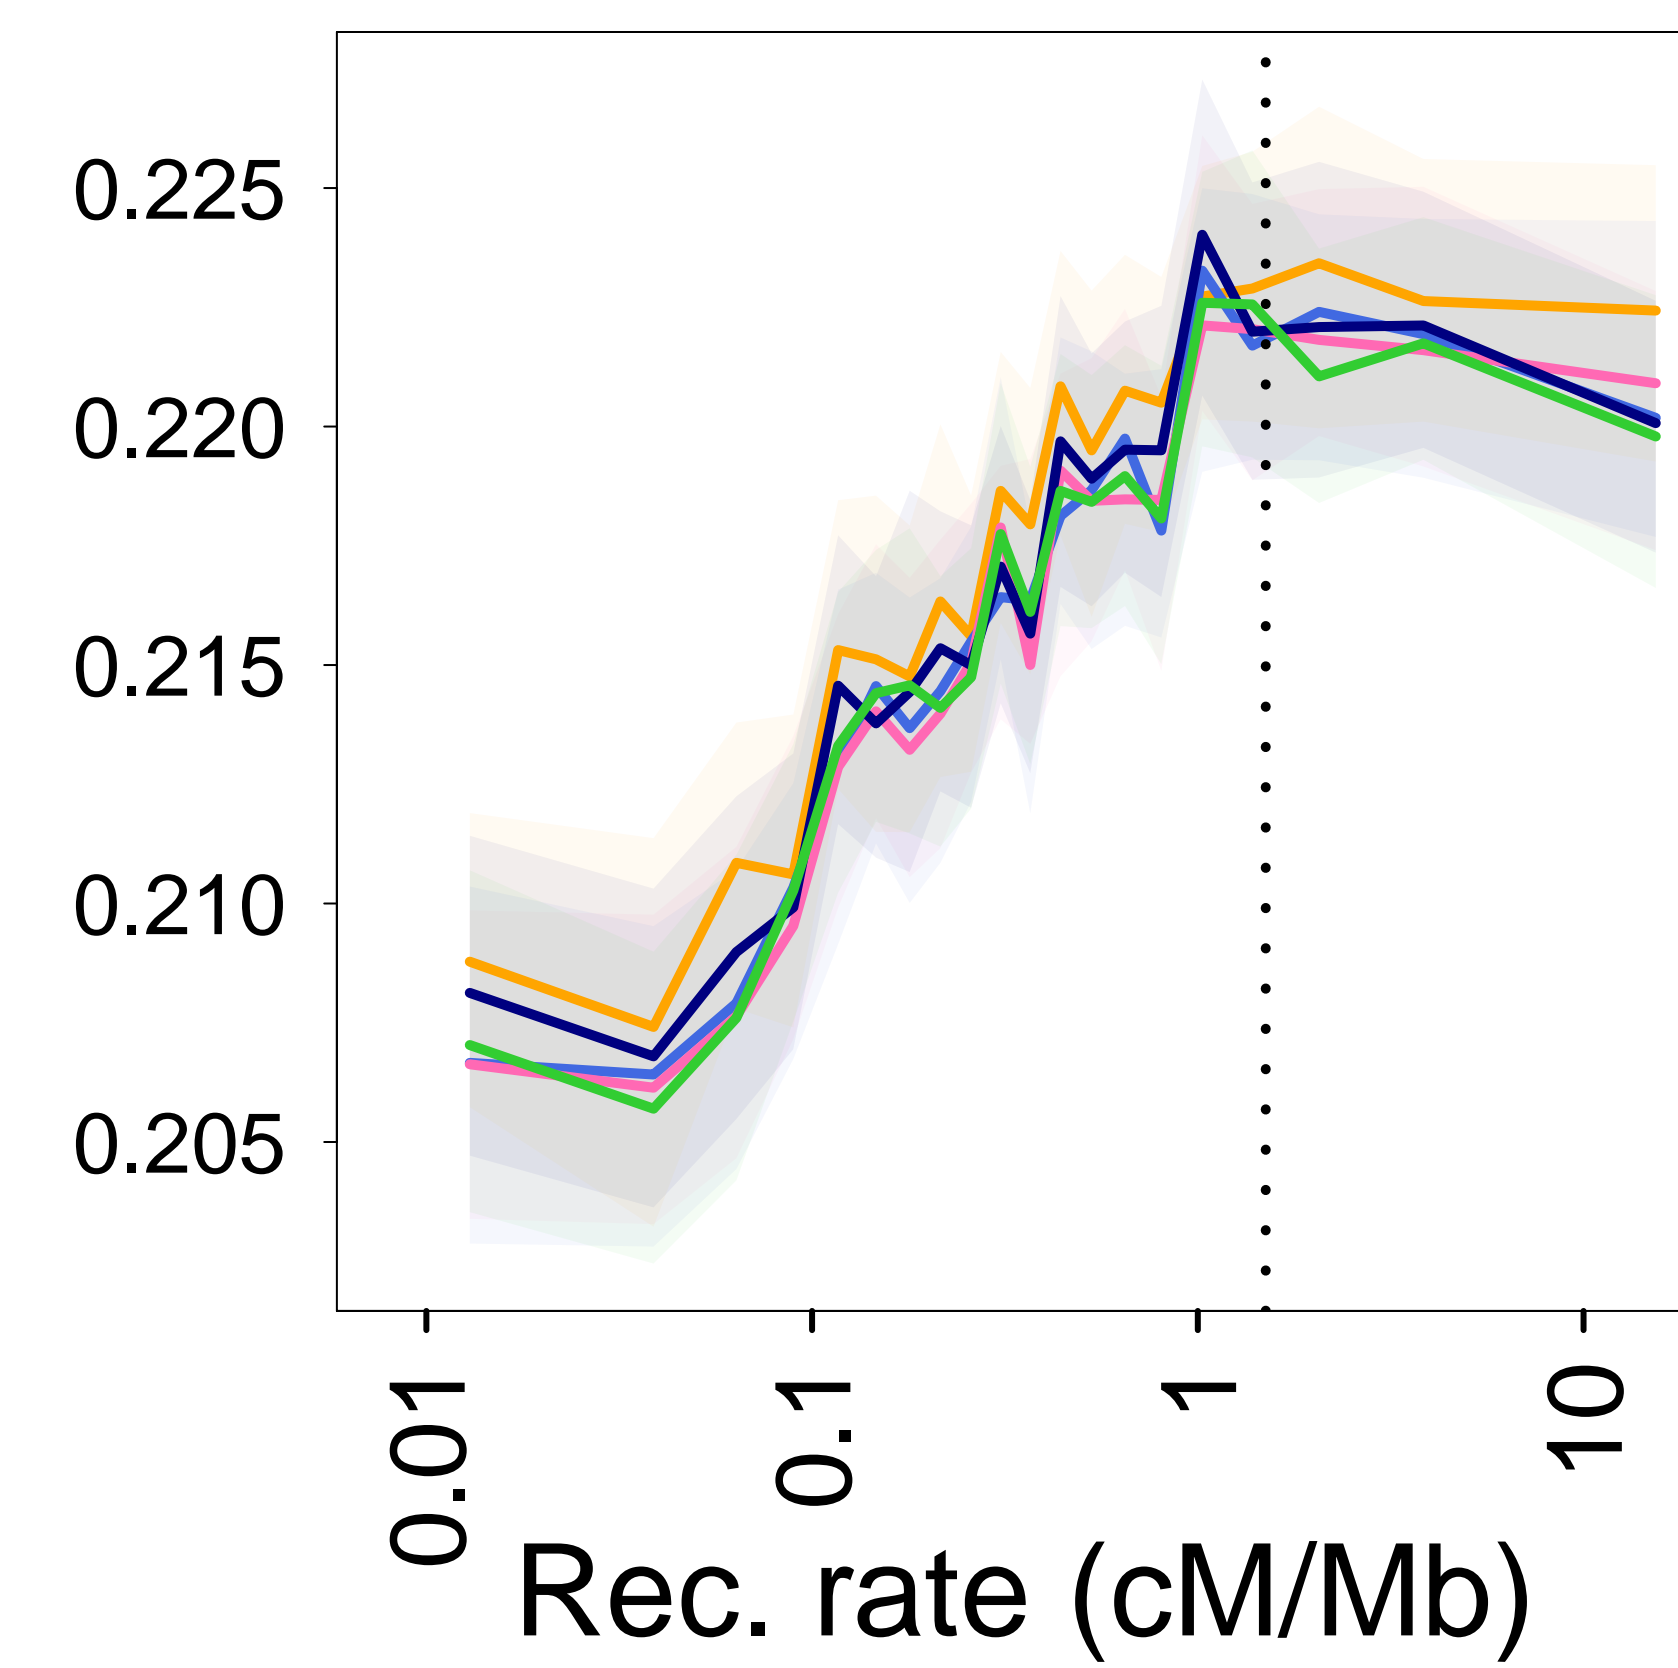

Supplement: supp [file elife-36317-supp-v2.zip]

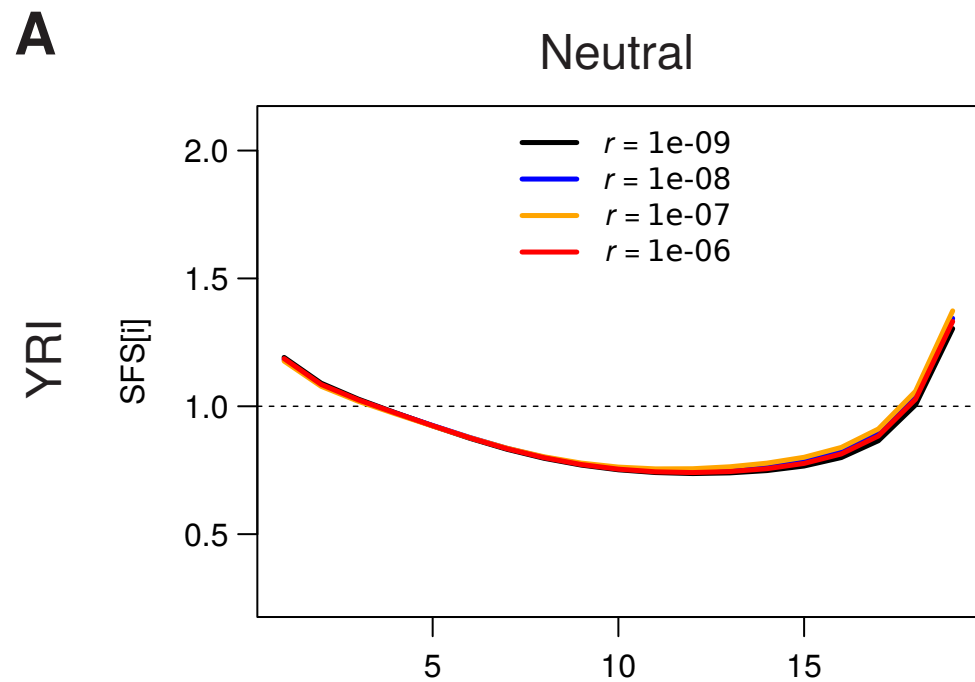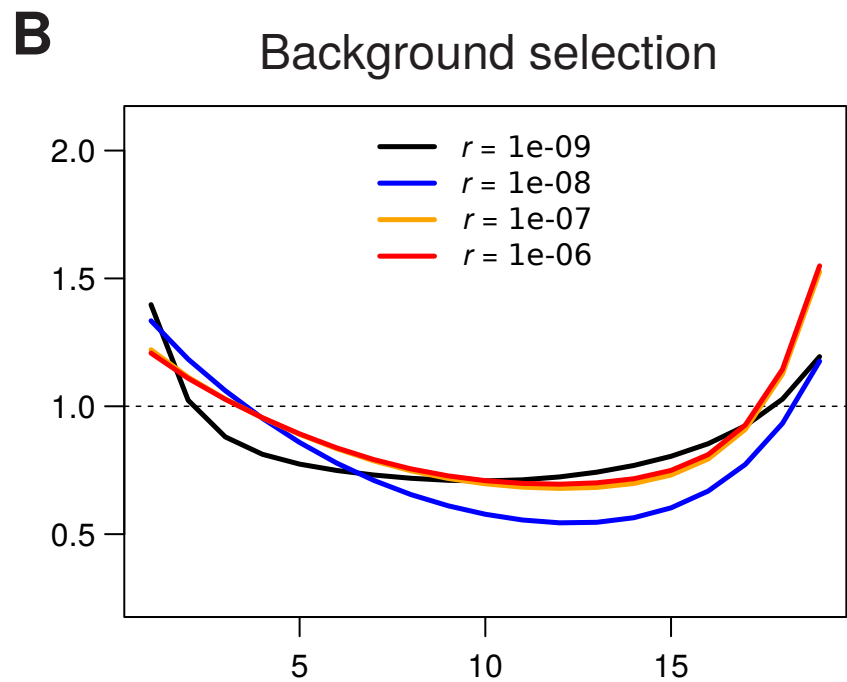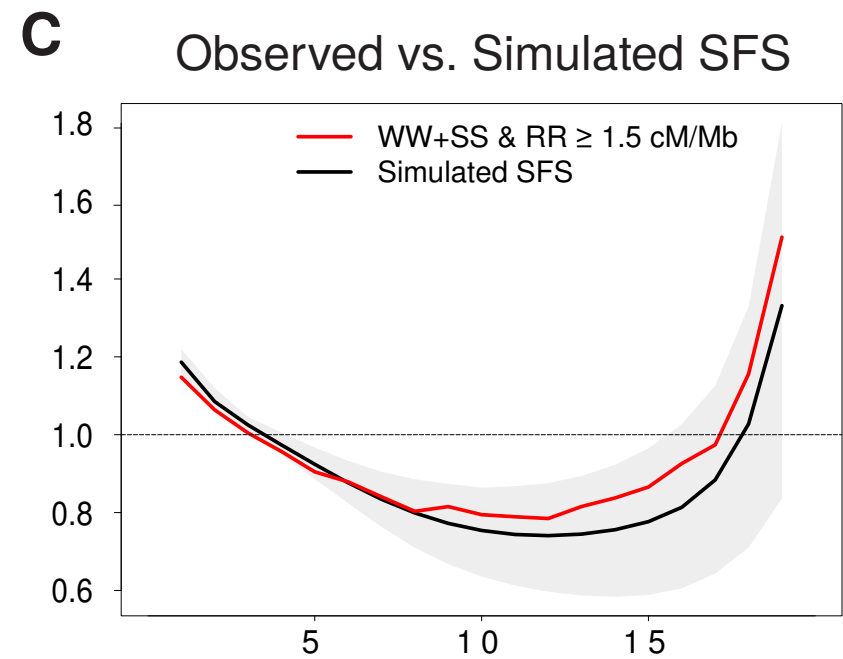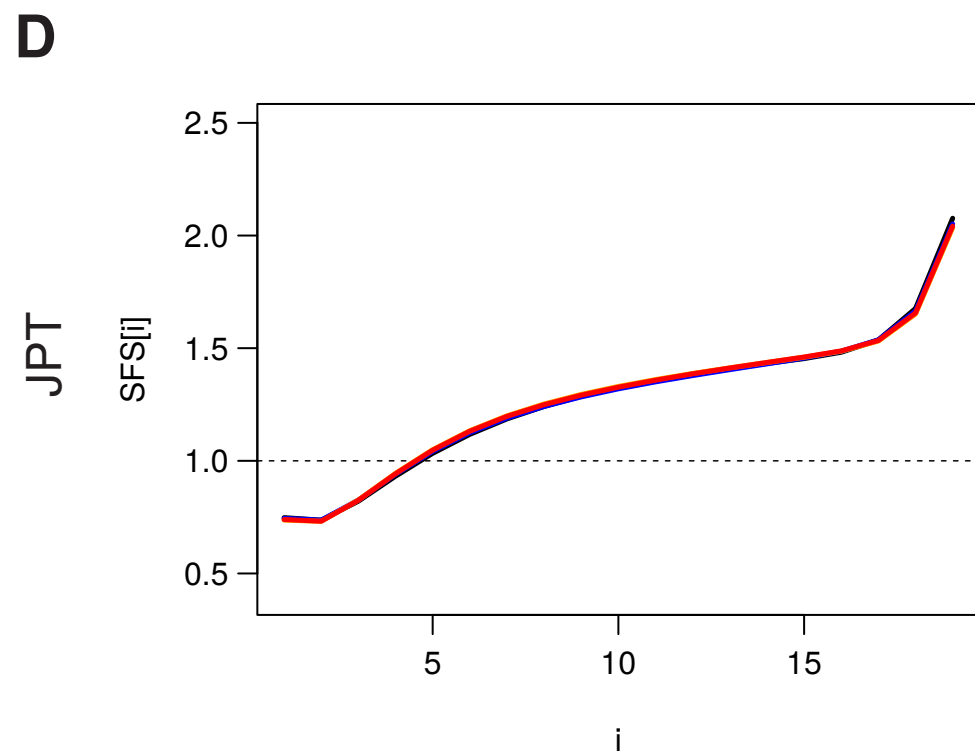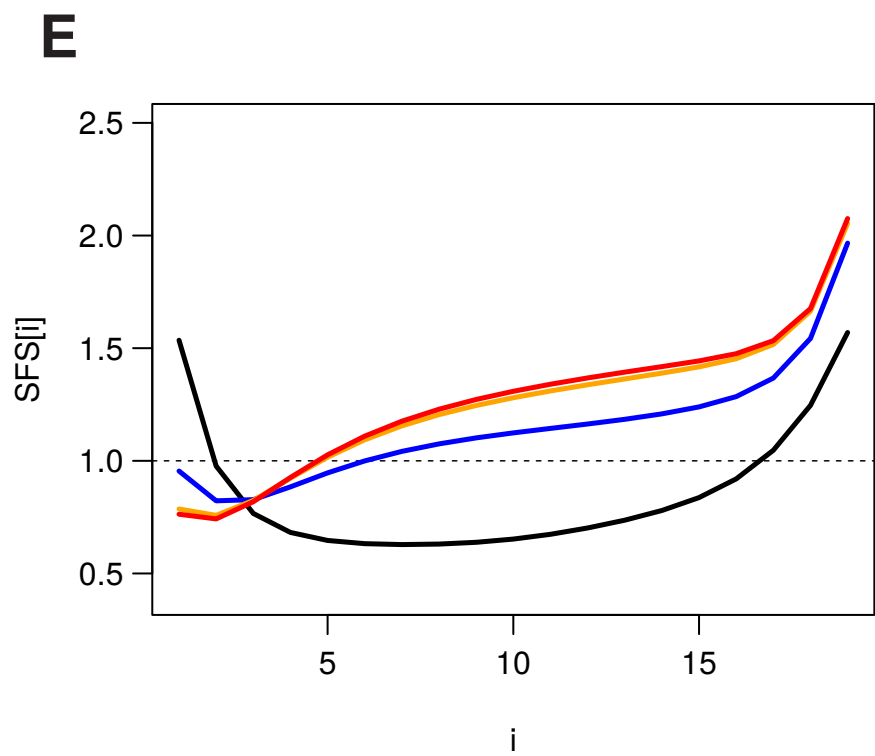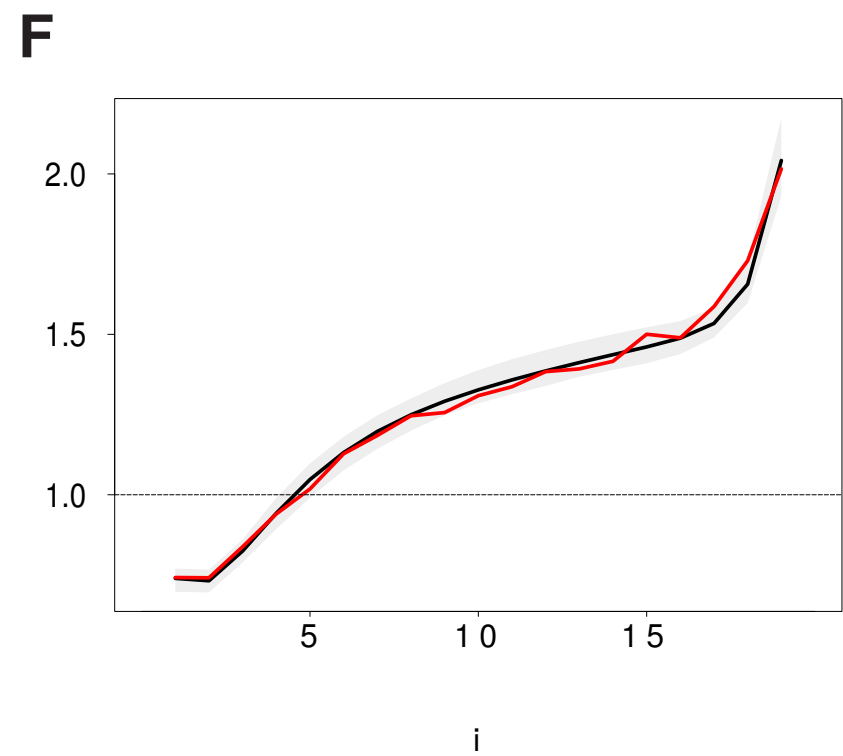

Supplement: supp [file elife-36317-supp-v2.zip]

A

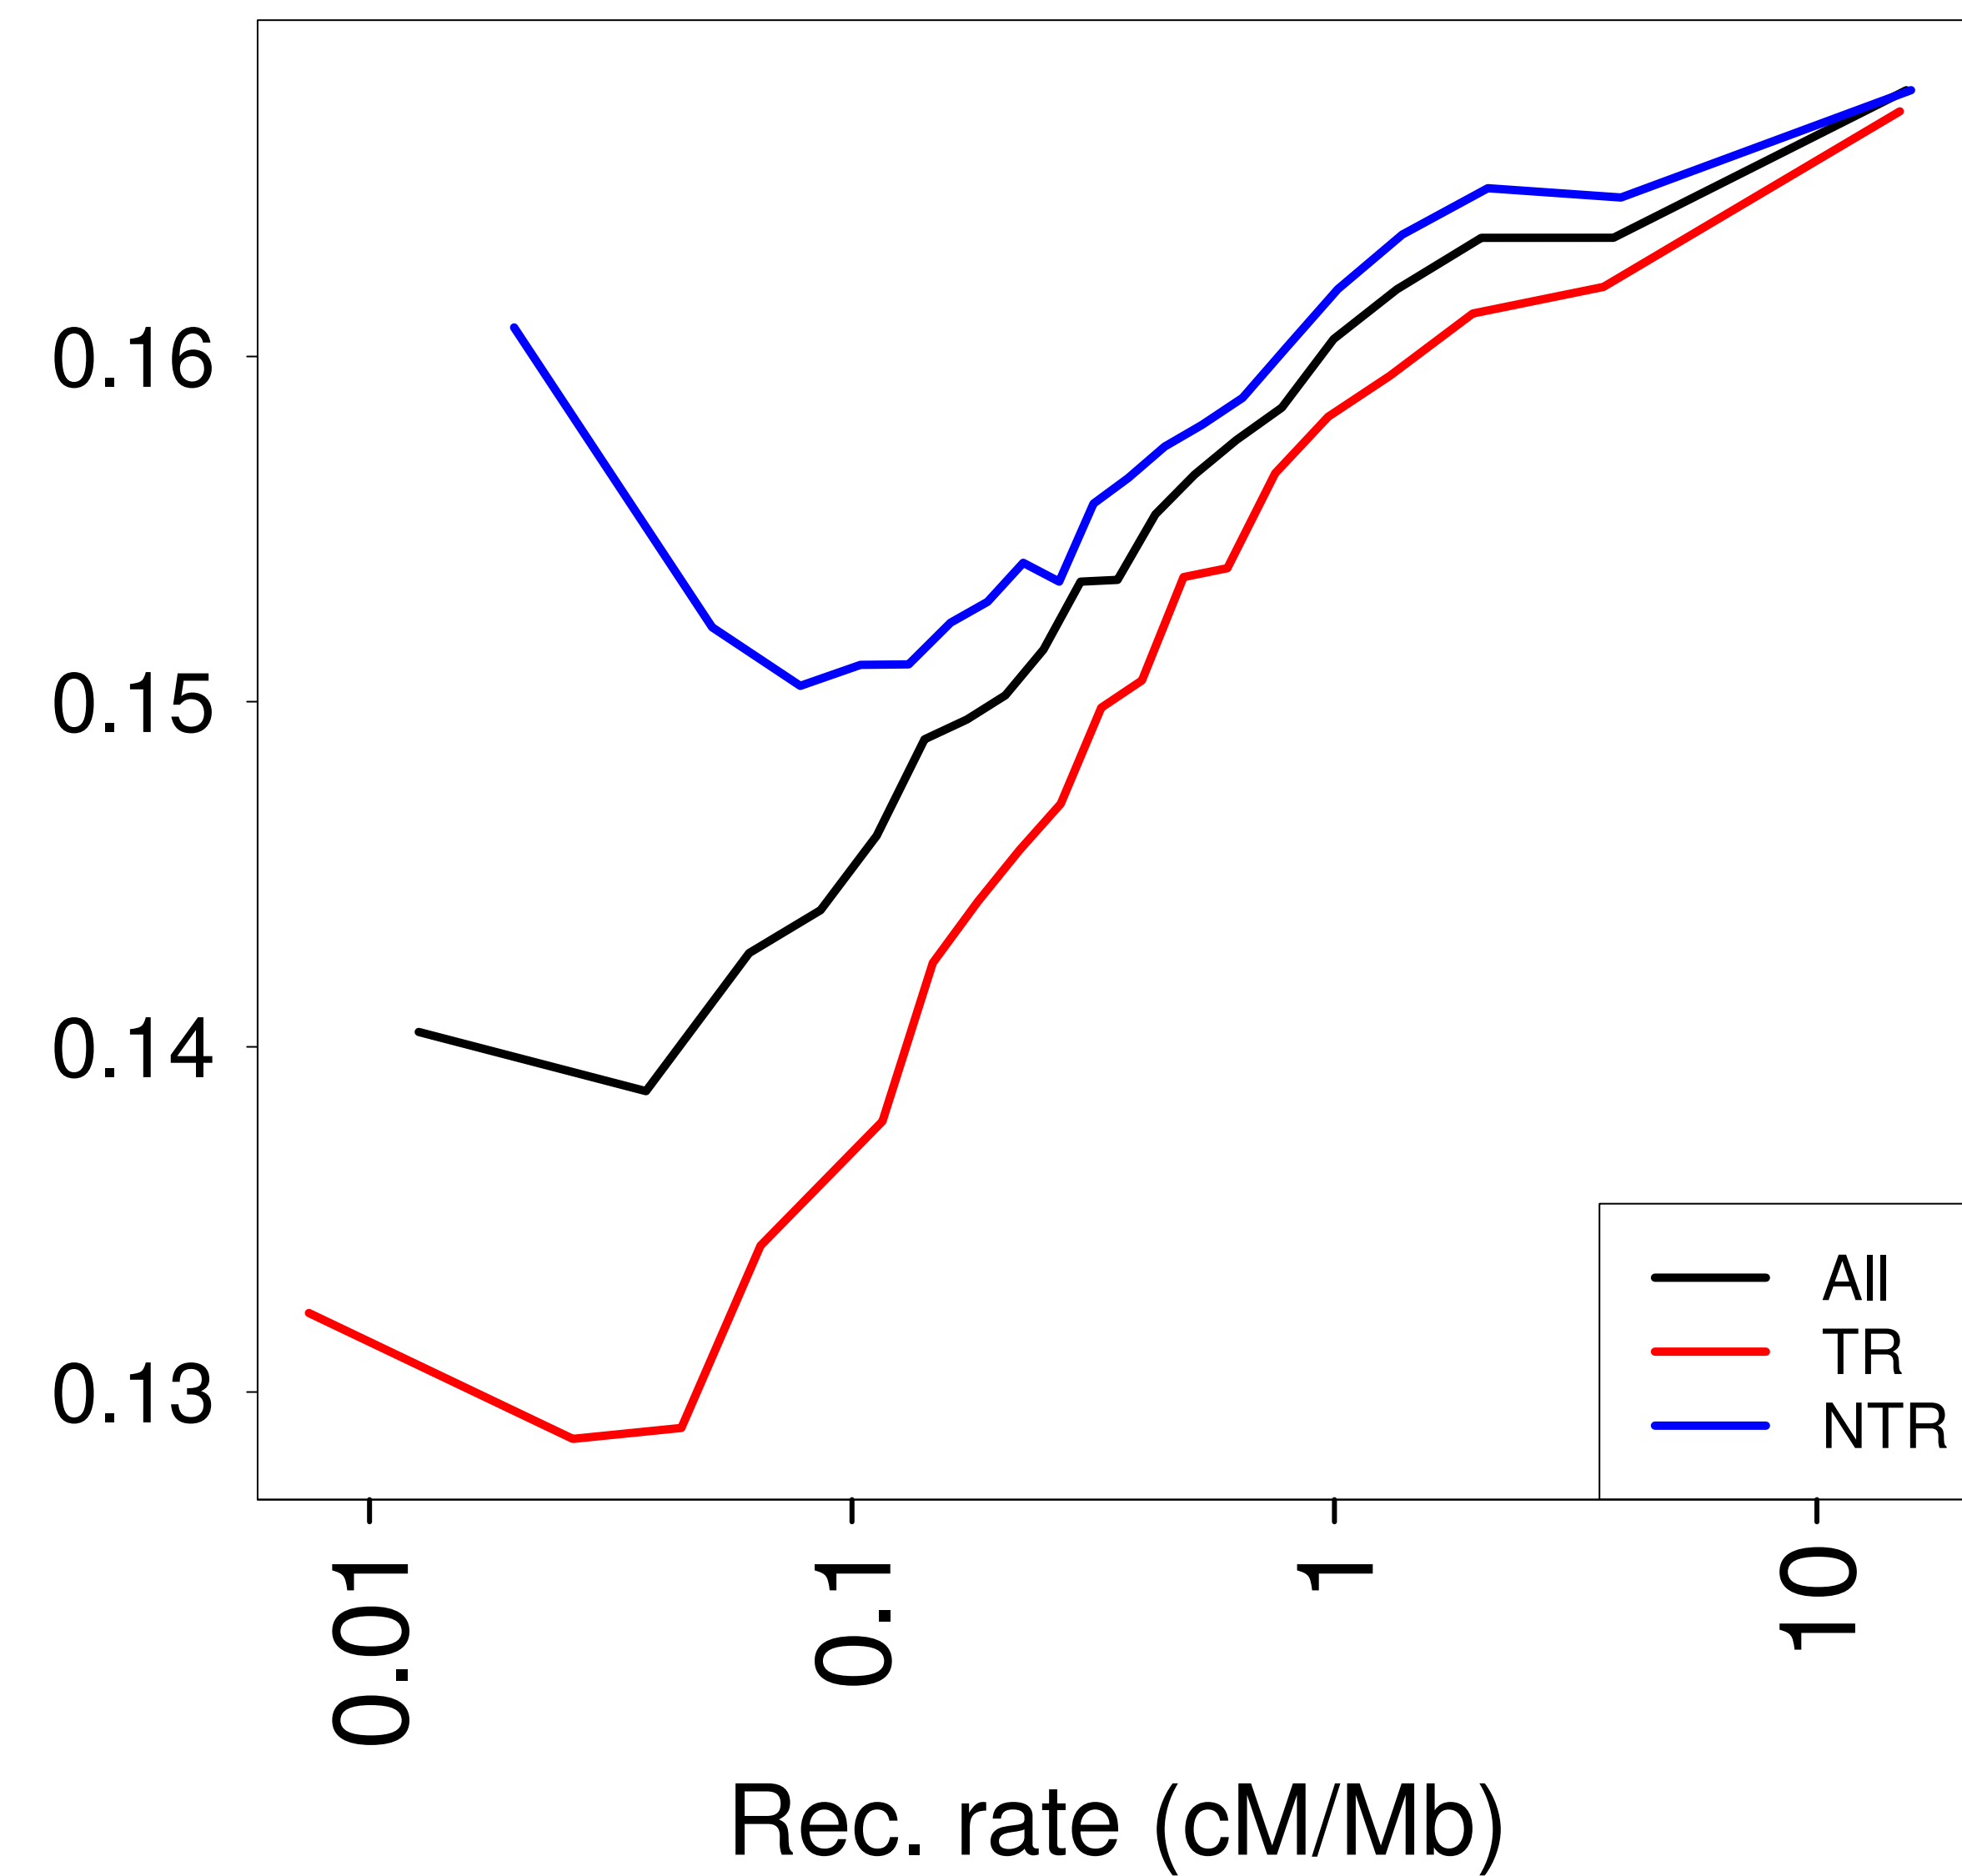

B

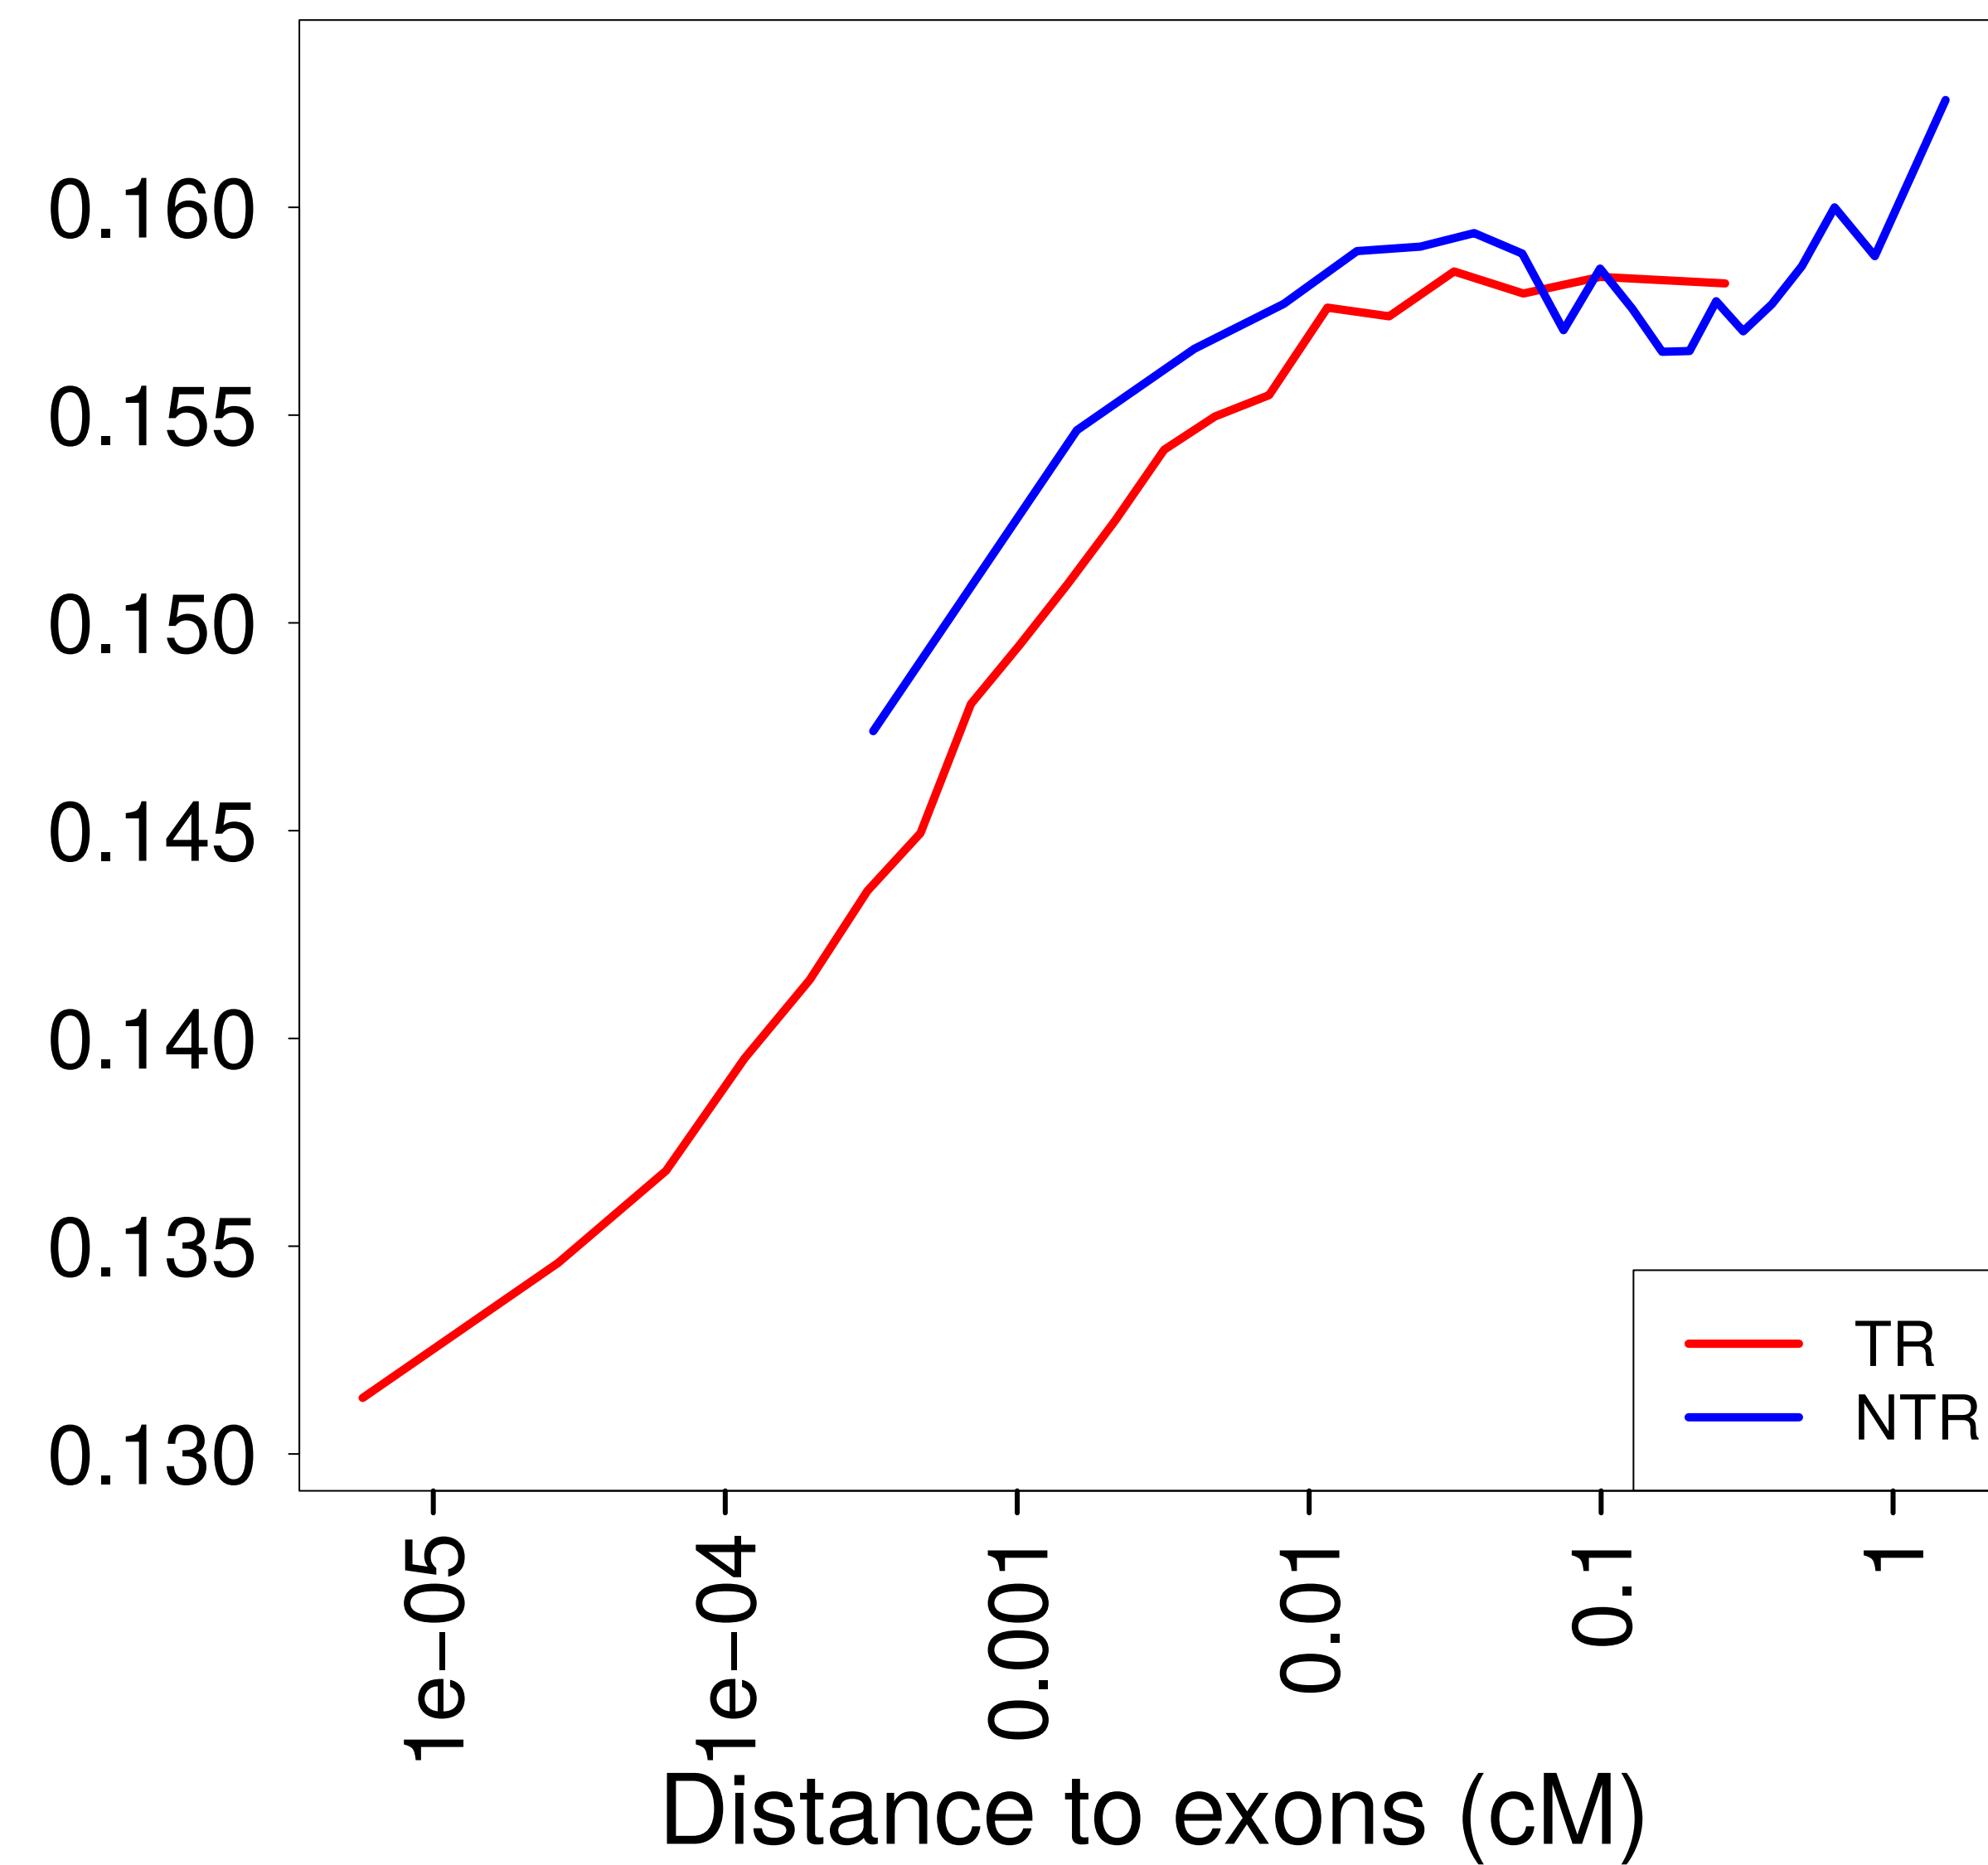

C

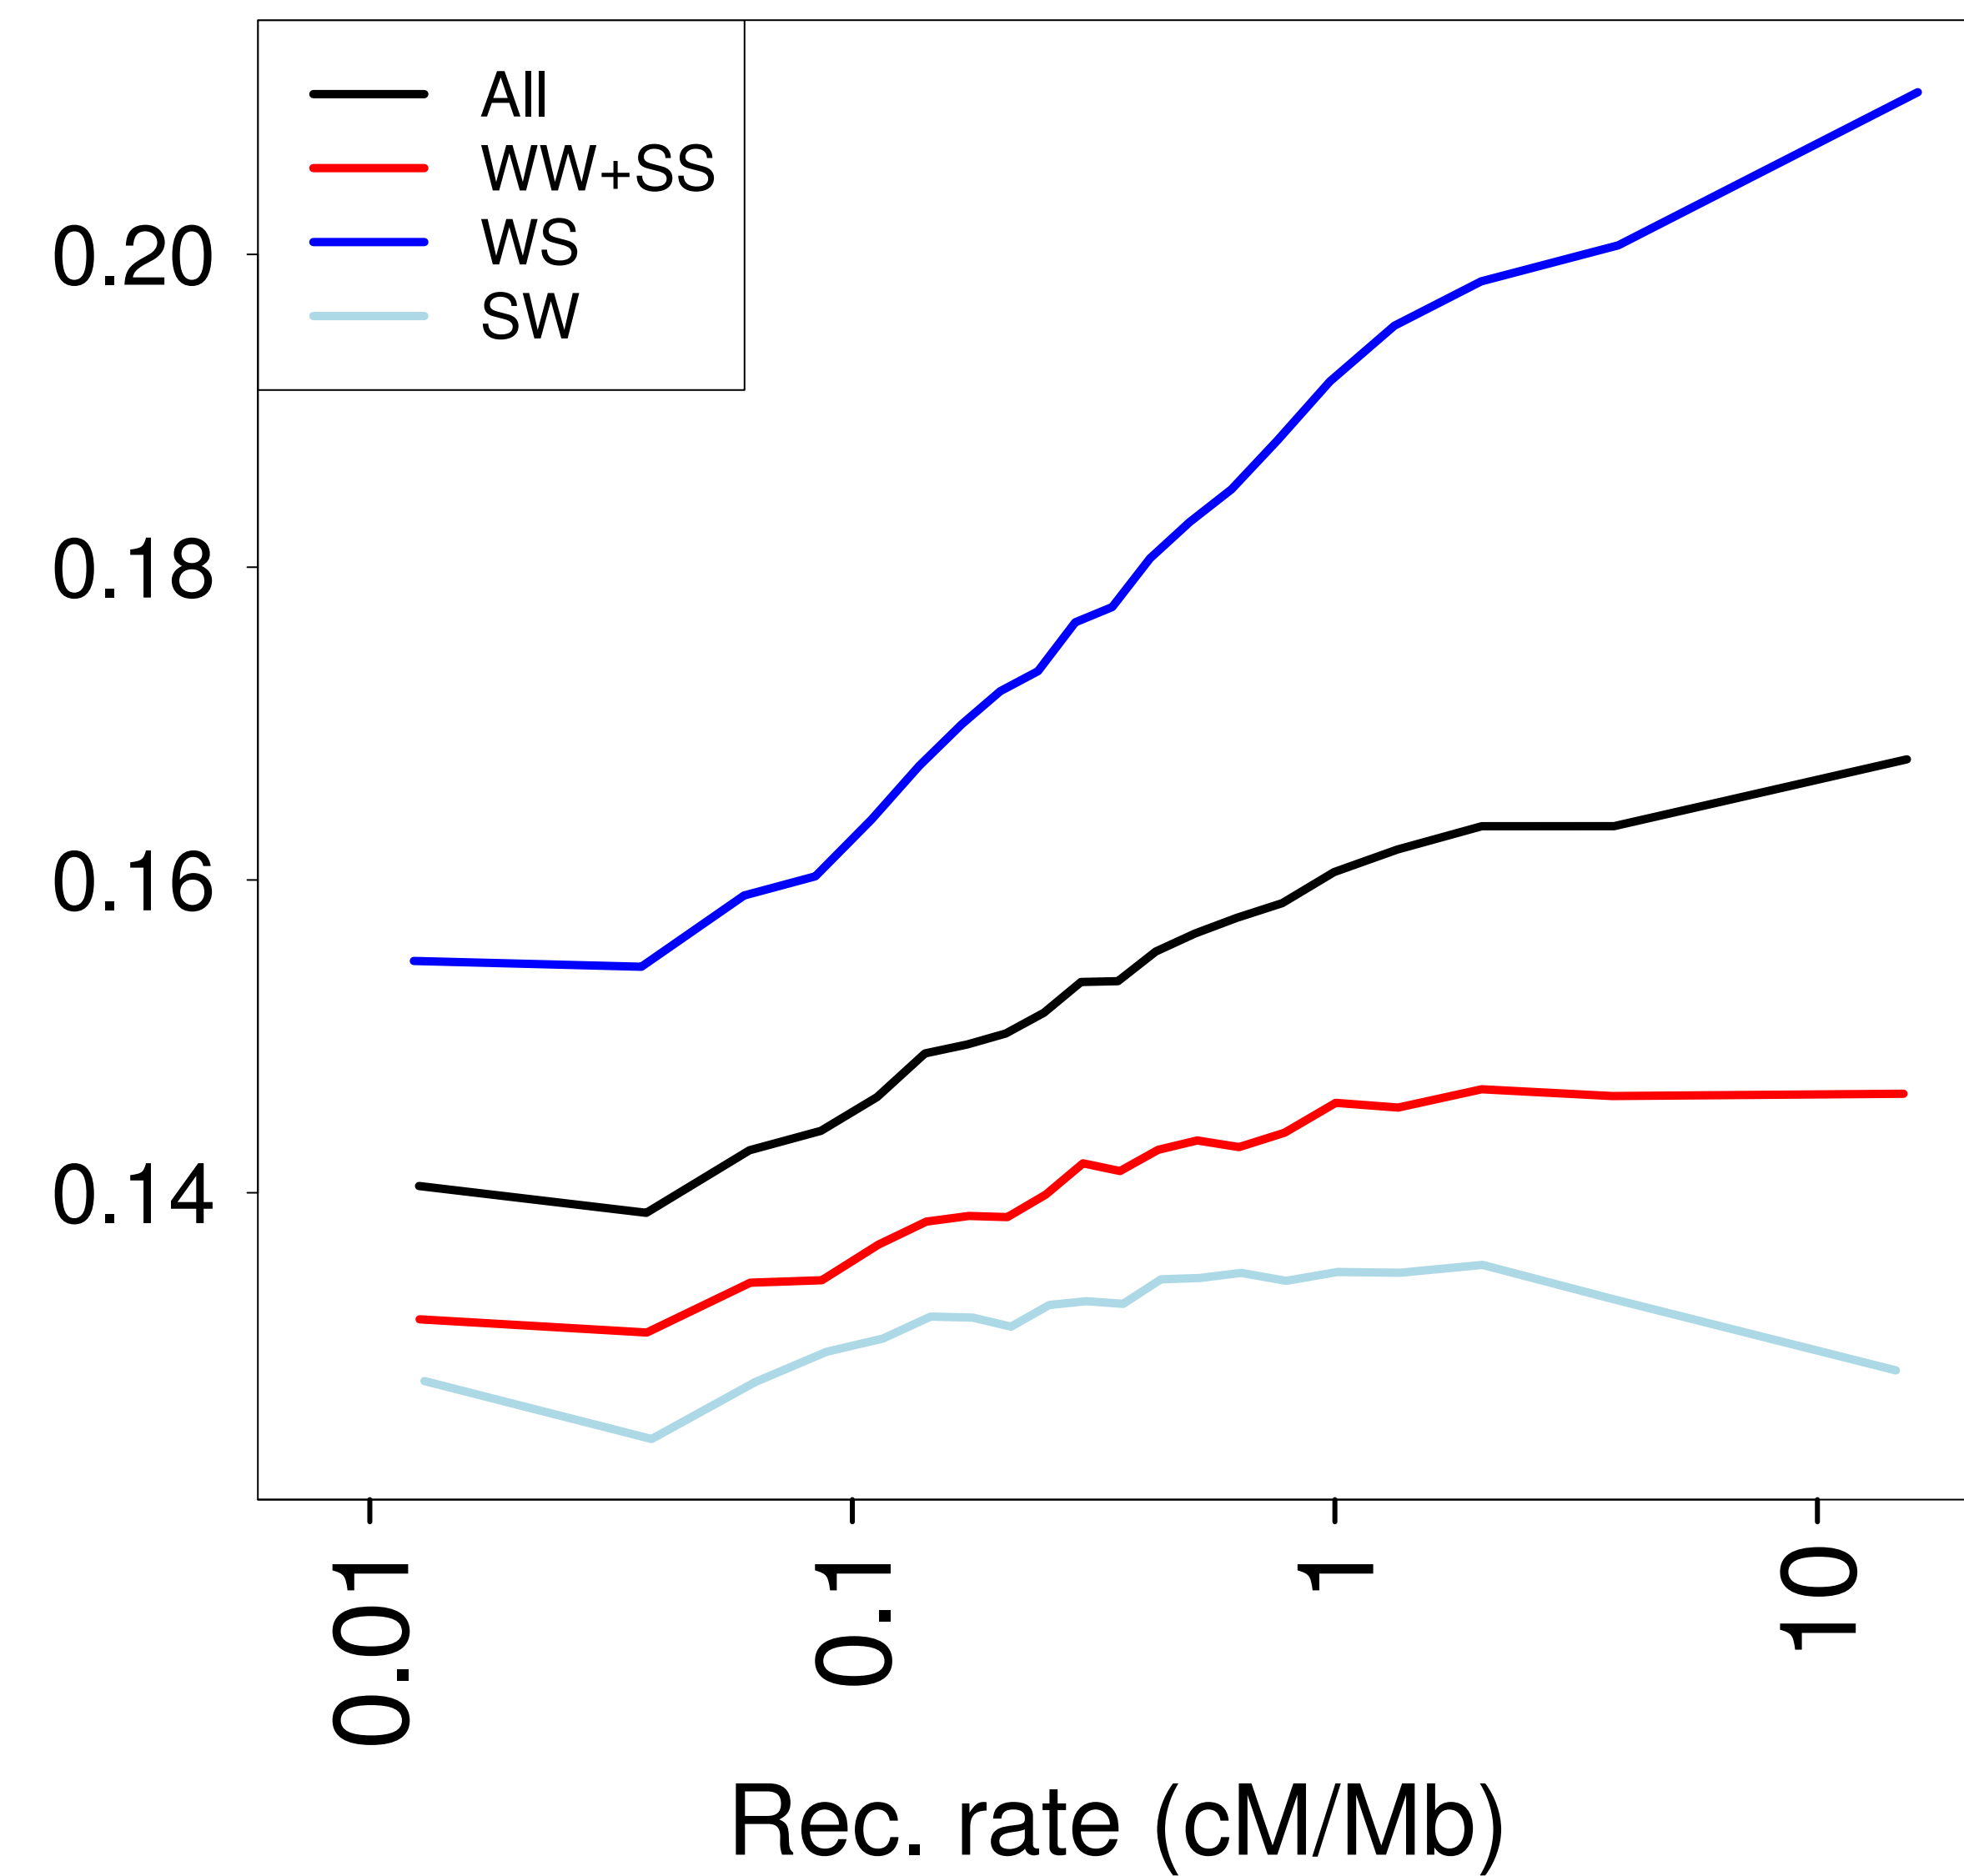

Supplement: supp [file elife-36317-supp-v2.zip]

**A**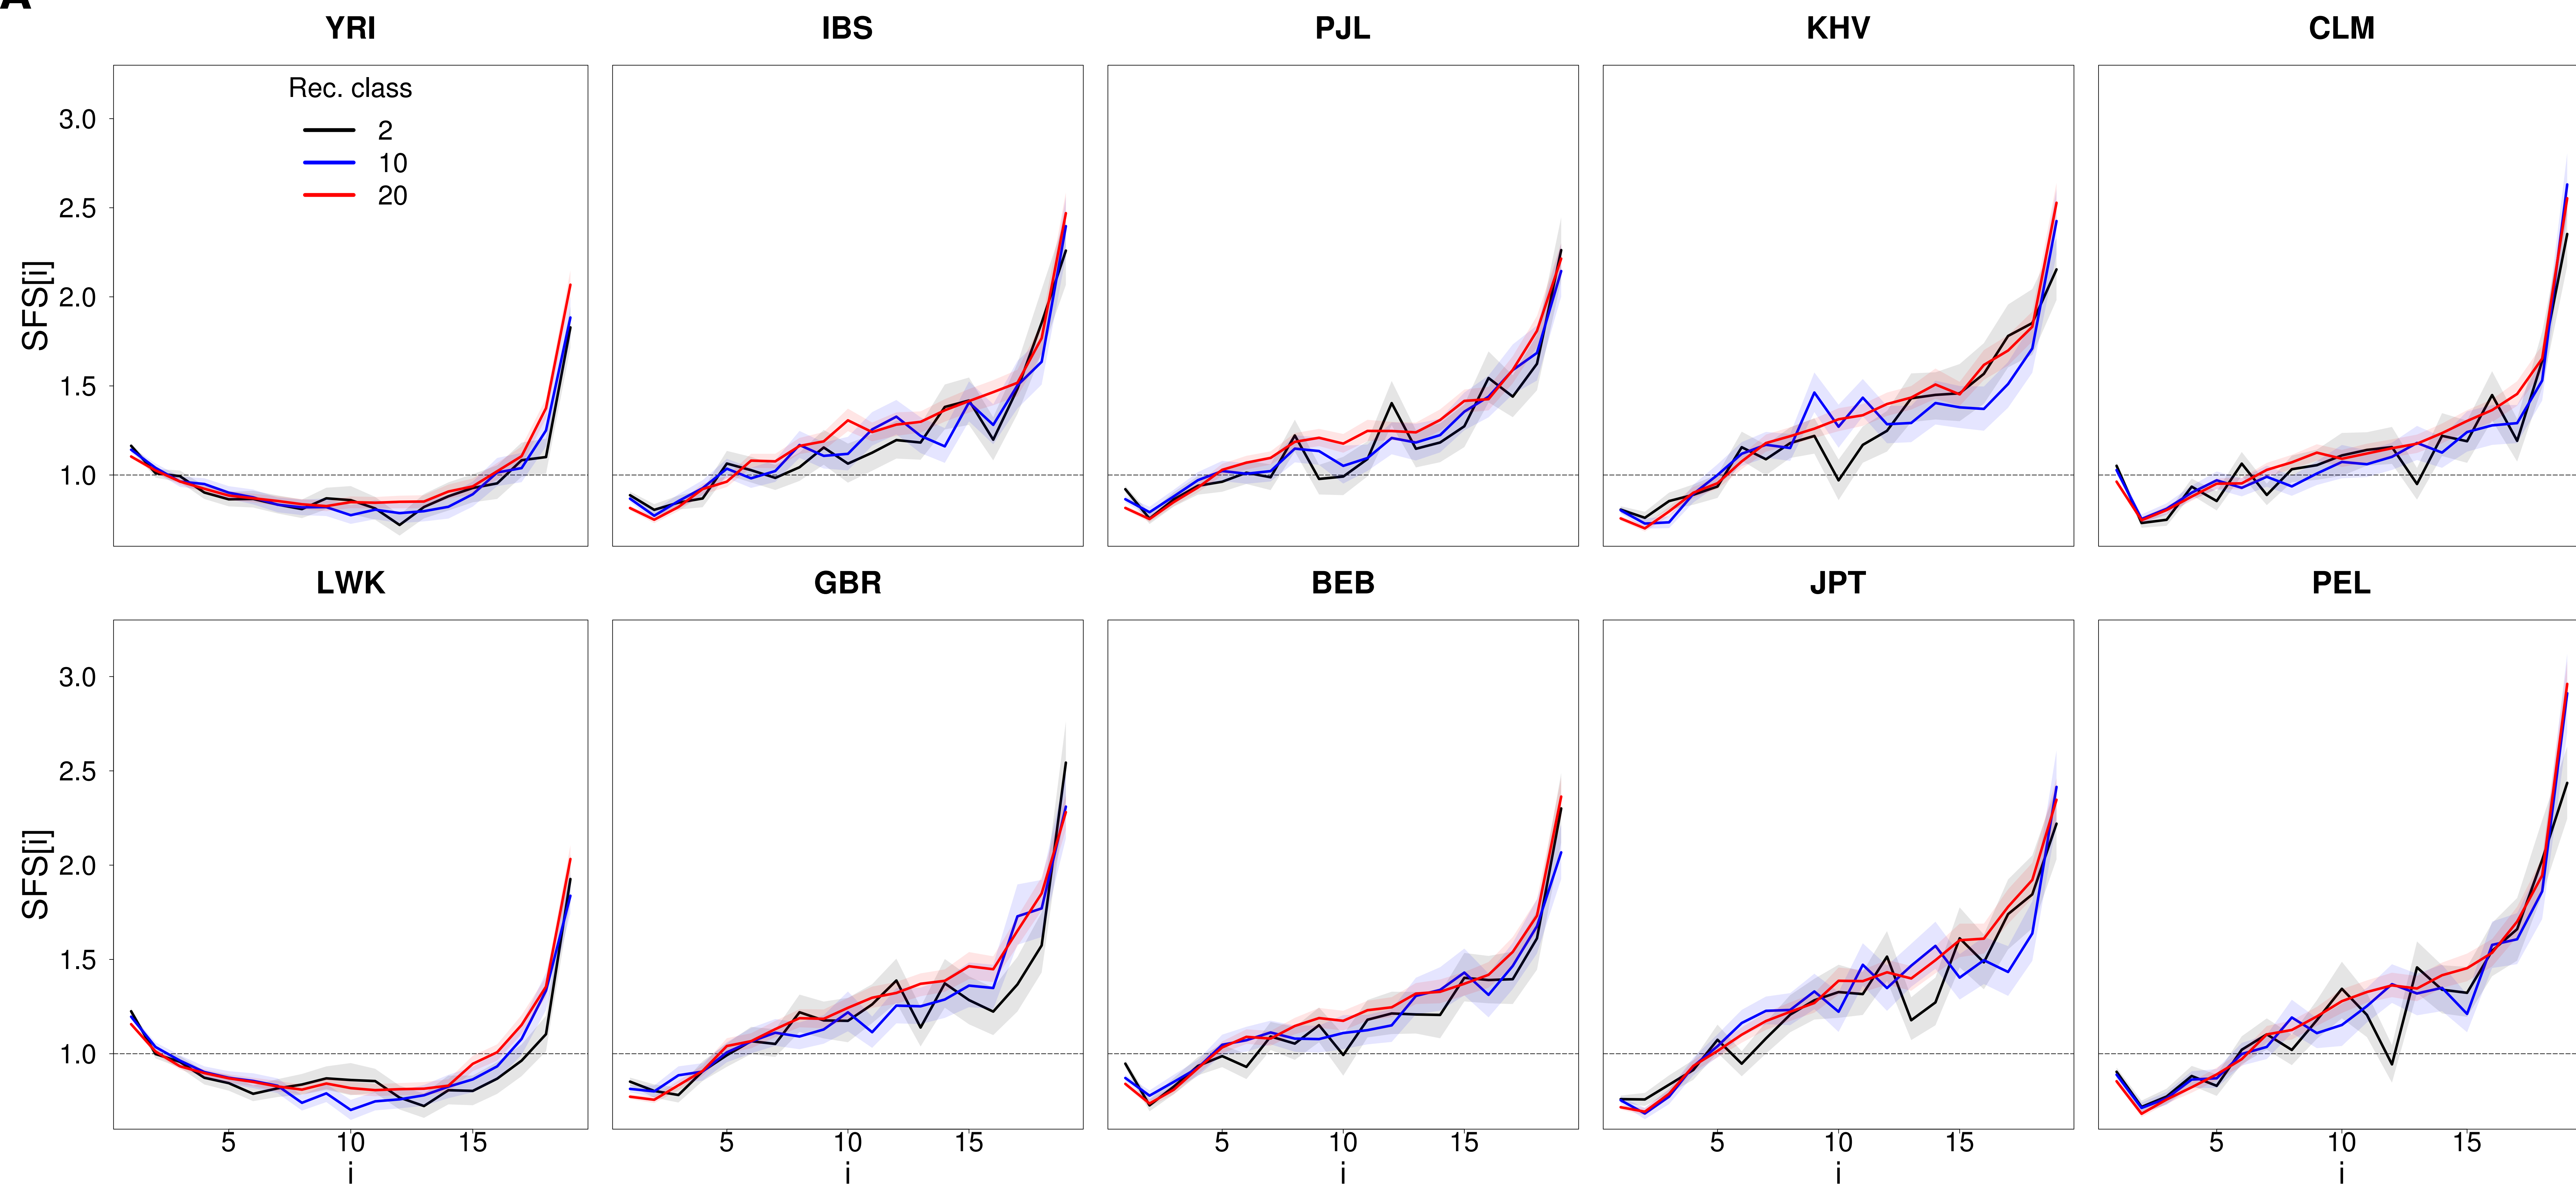**B**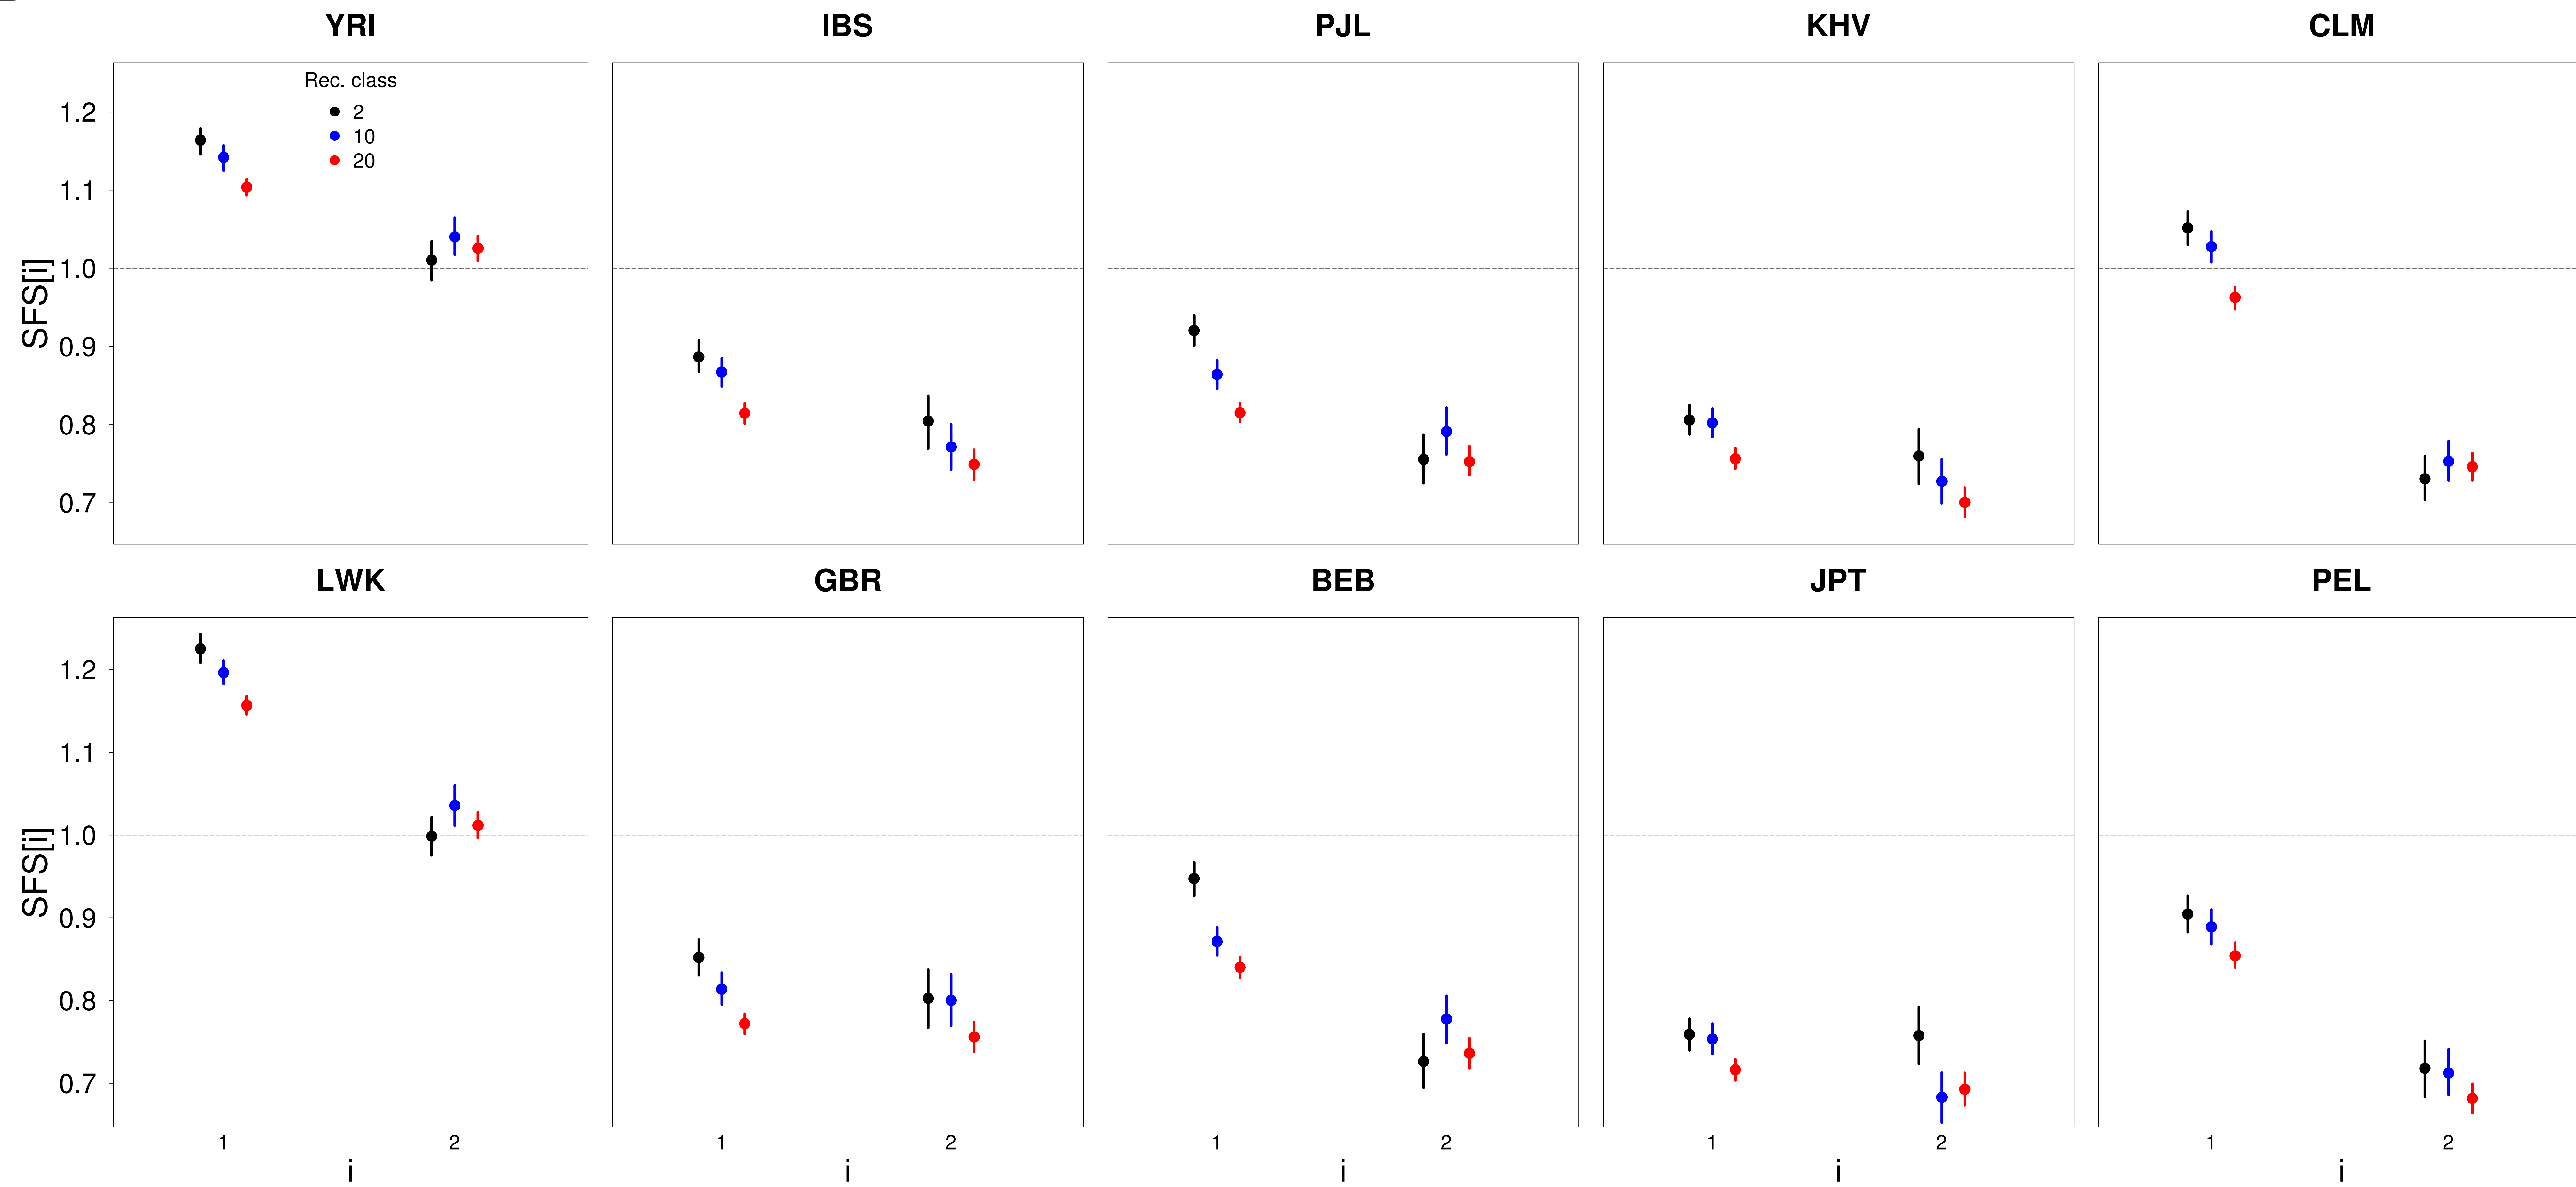

Supplement: supp [file elife-36317-supp-v2.zip]

**A**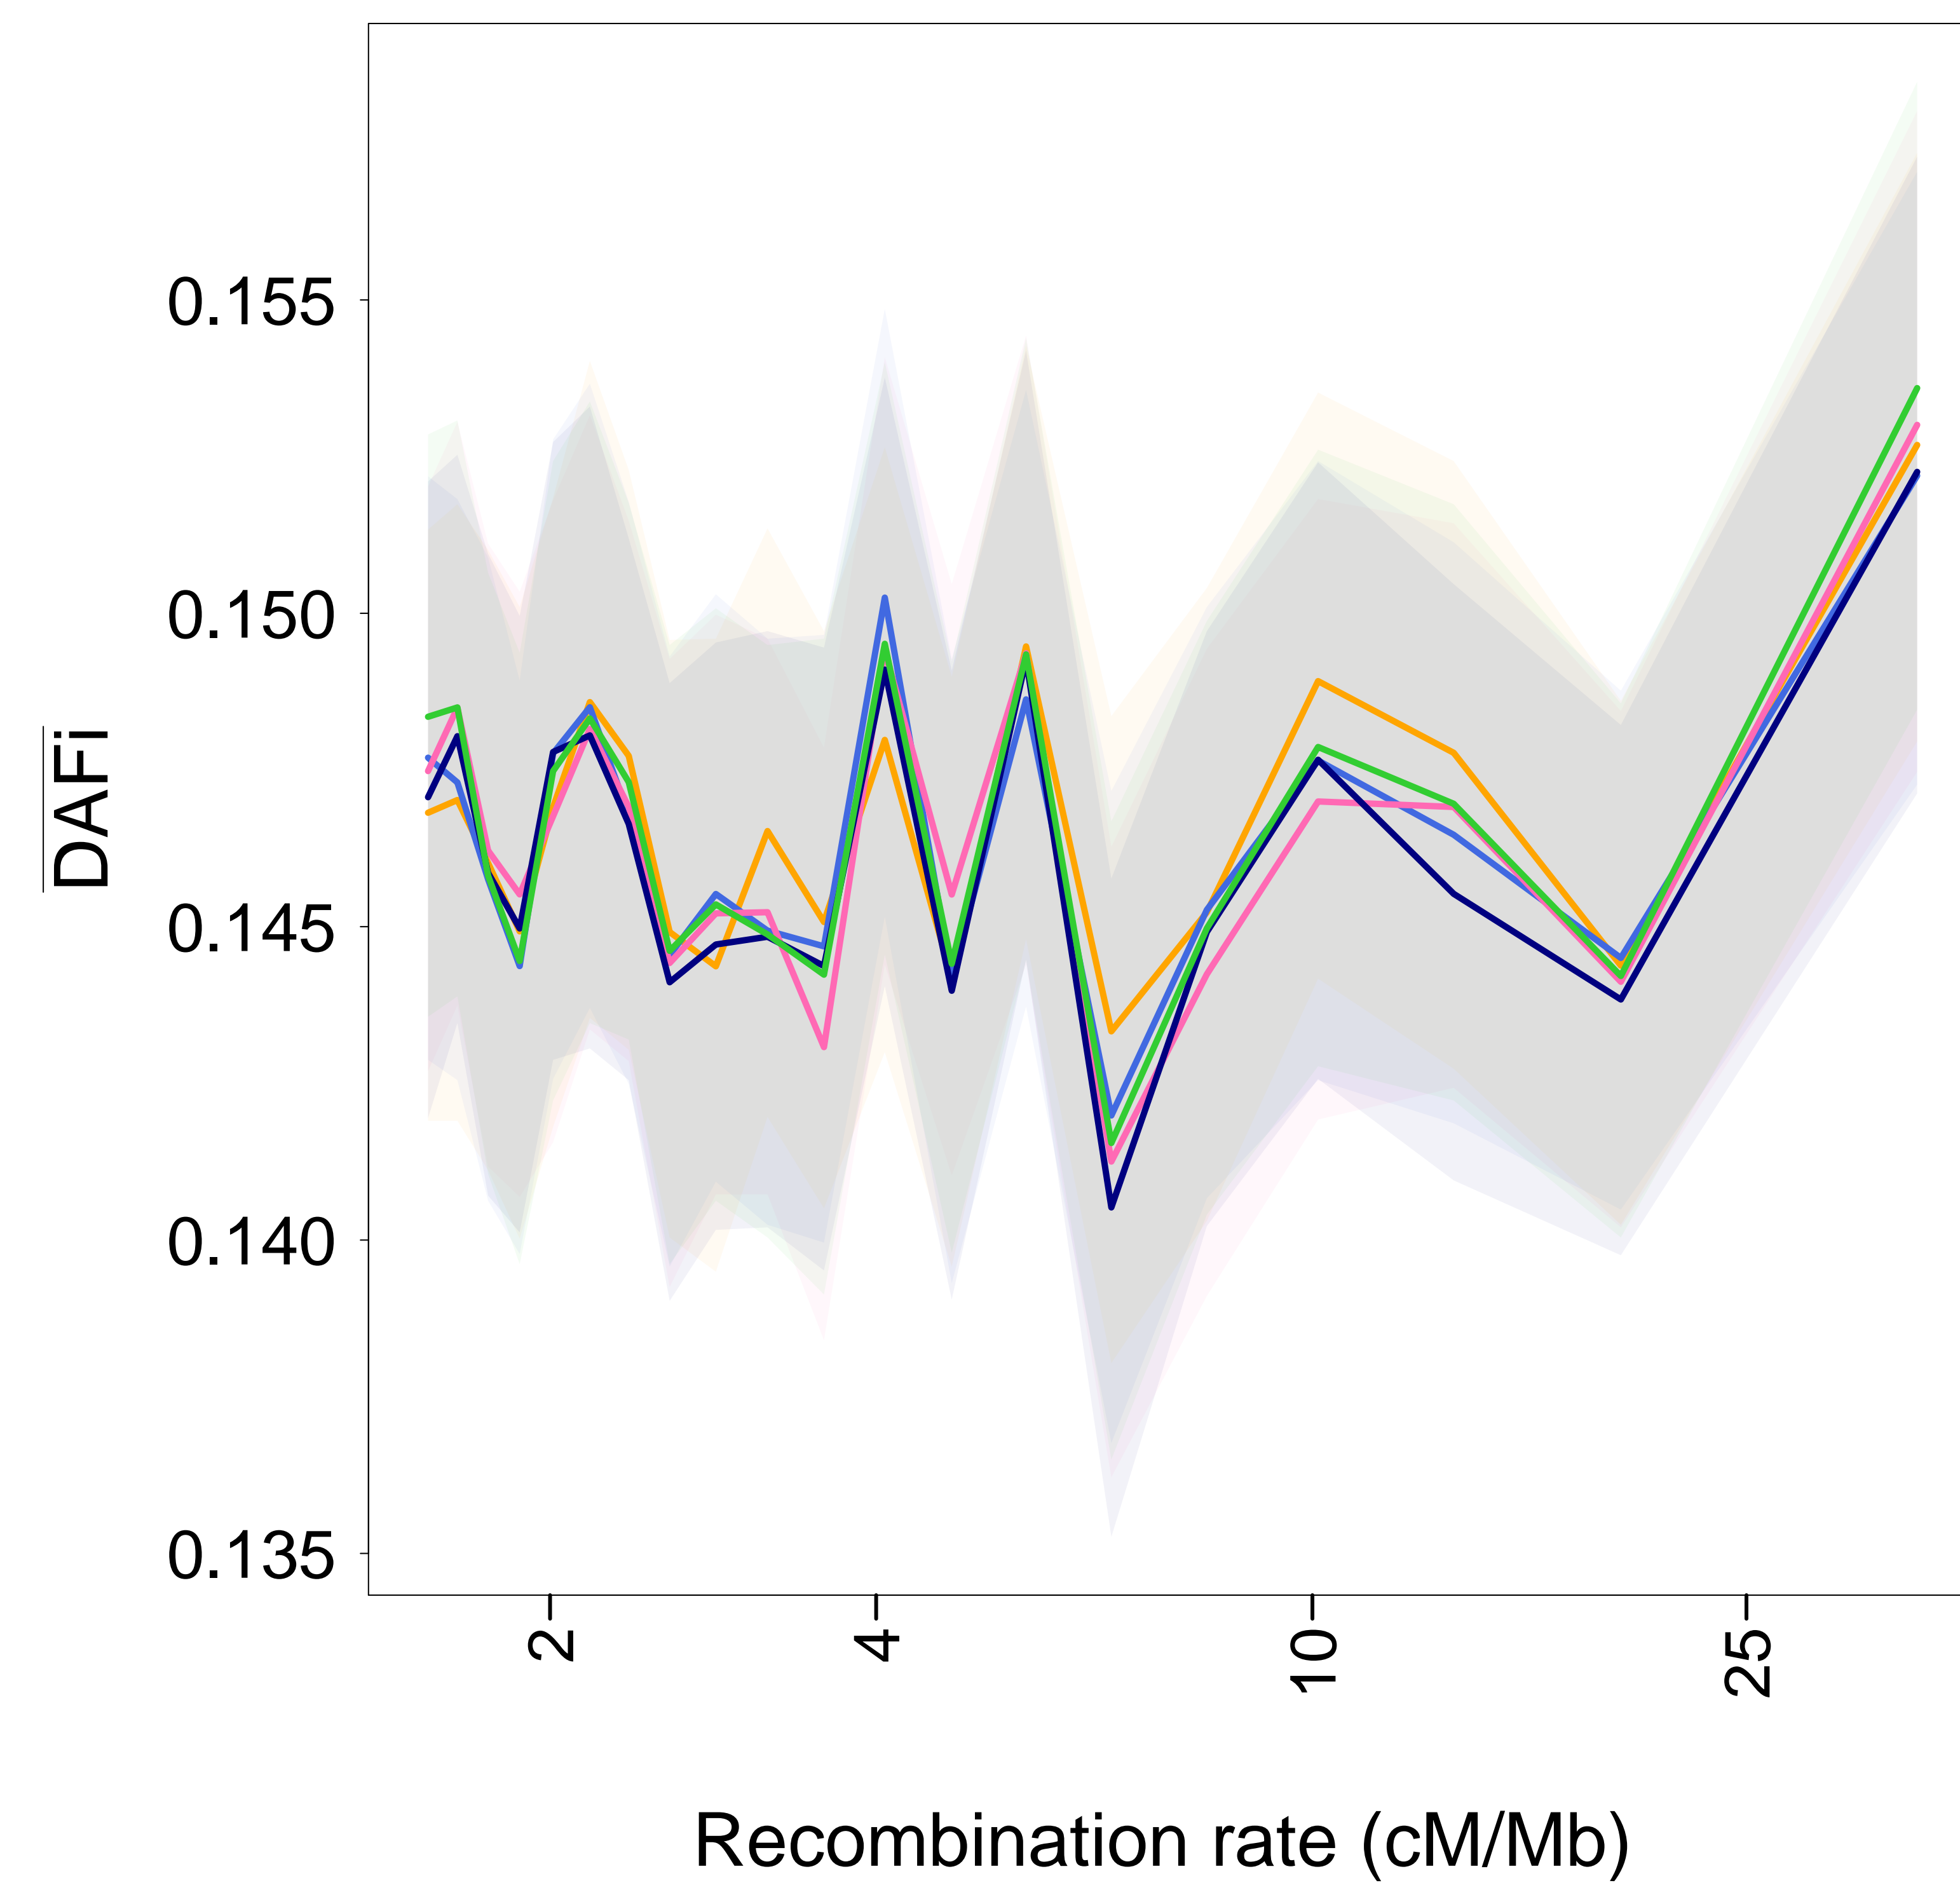**B**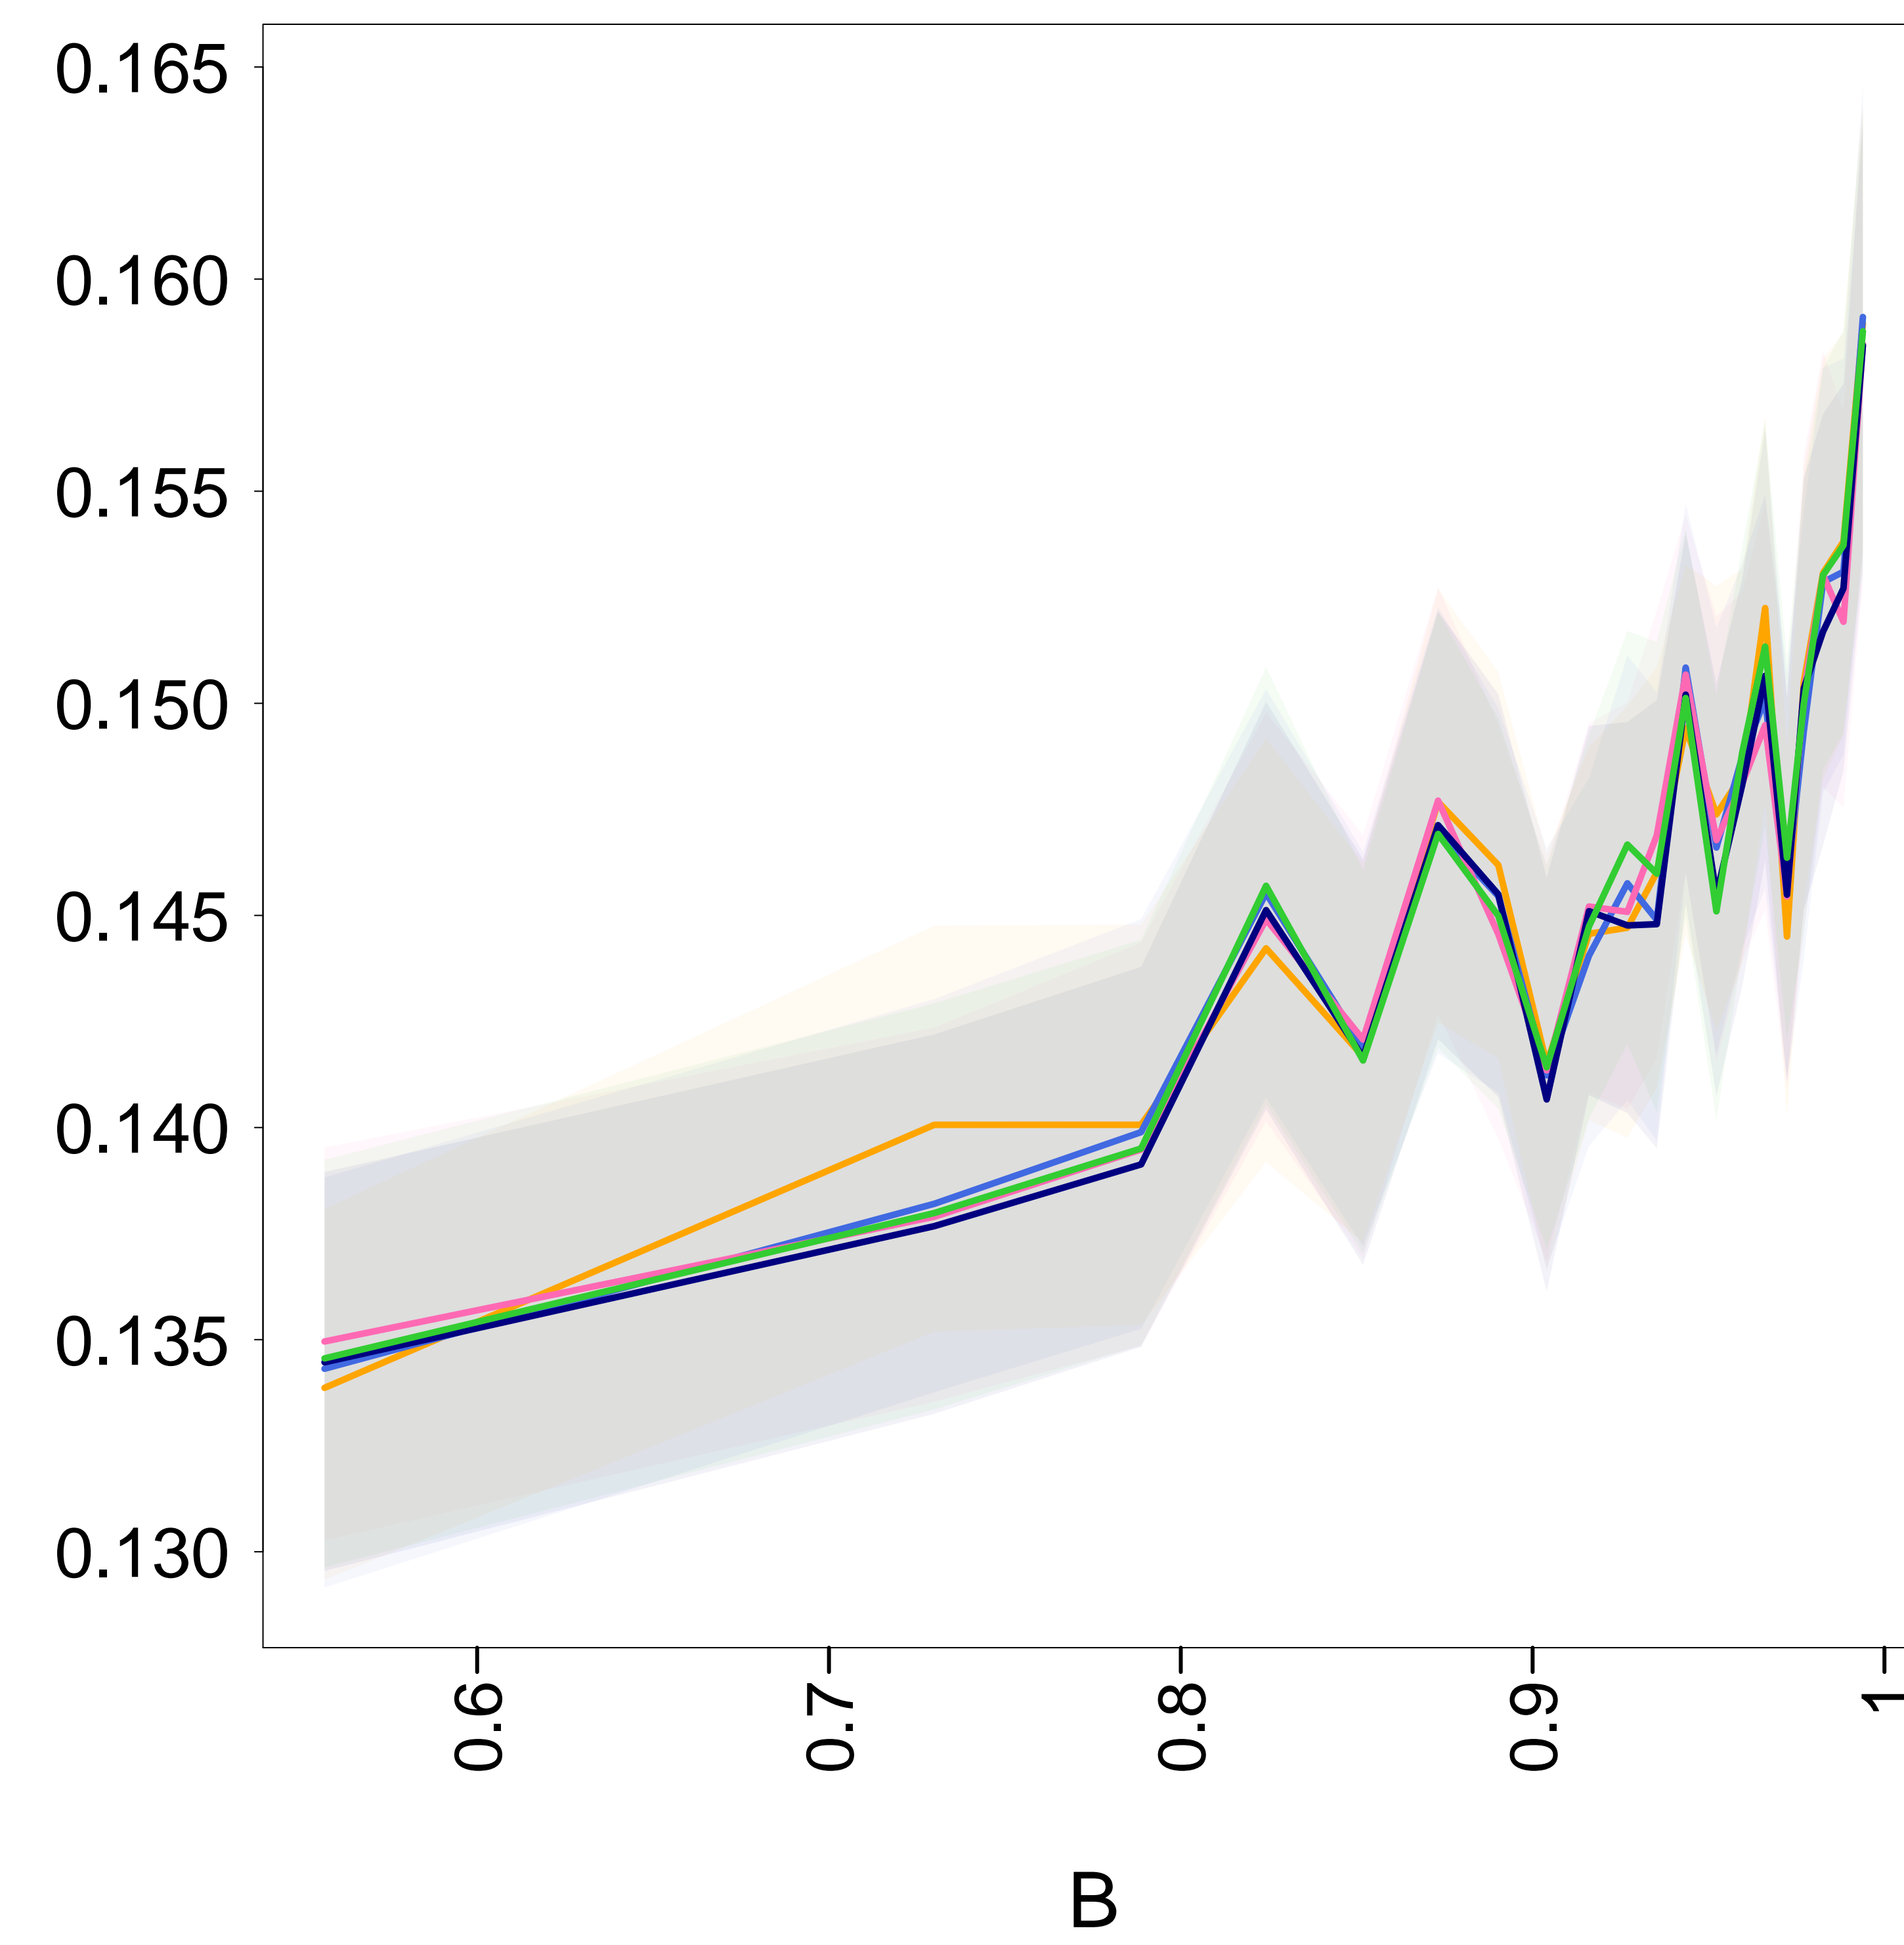**C**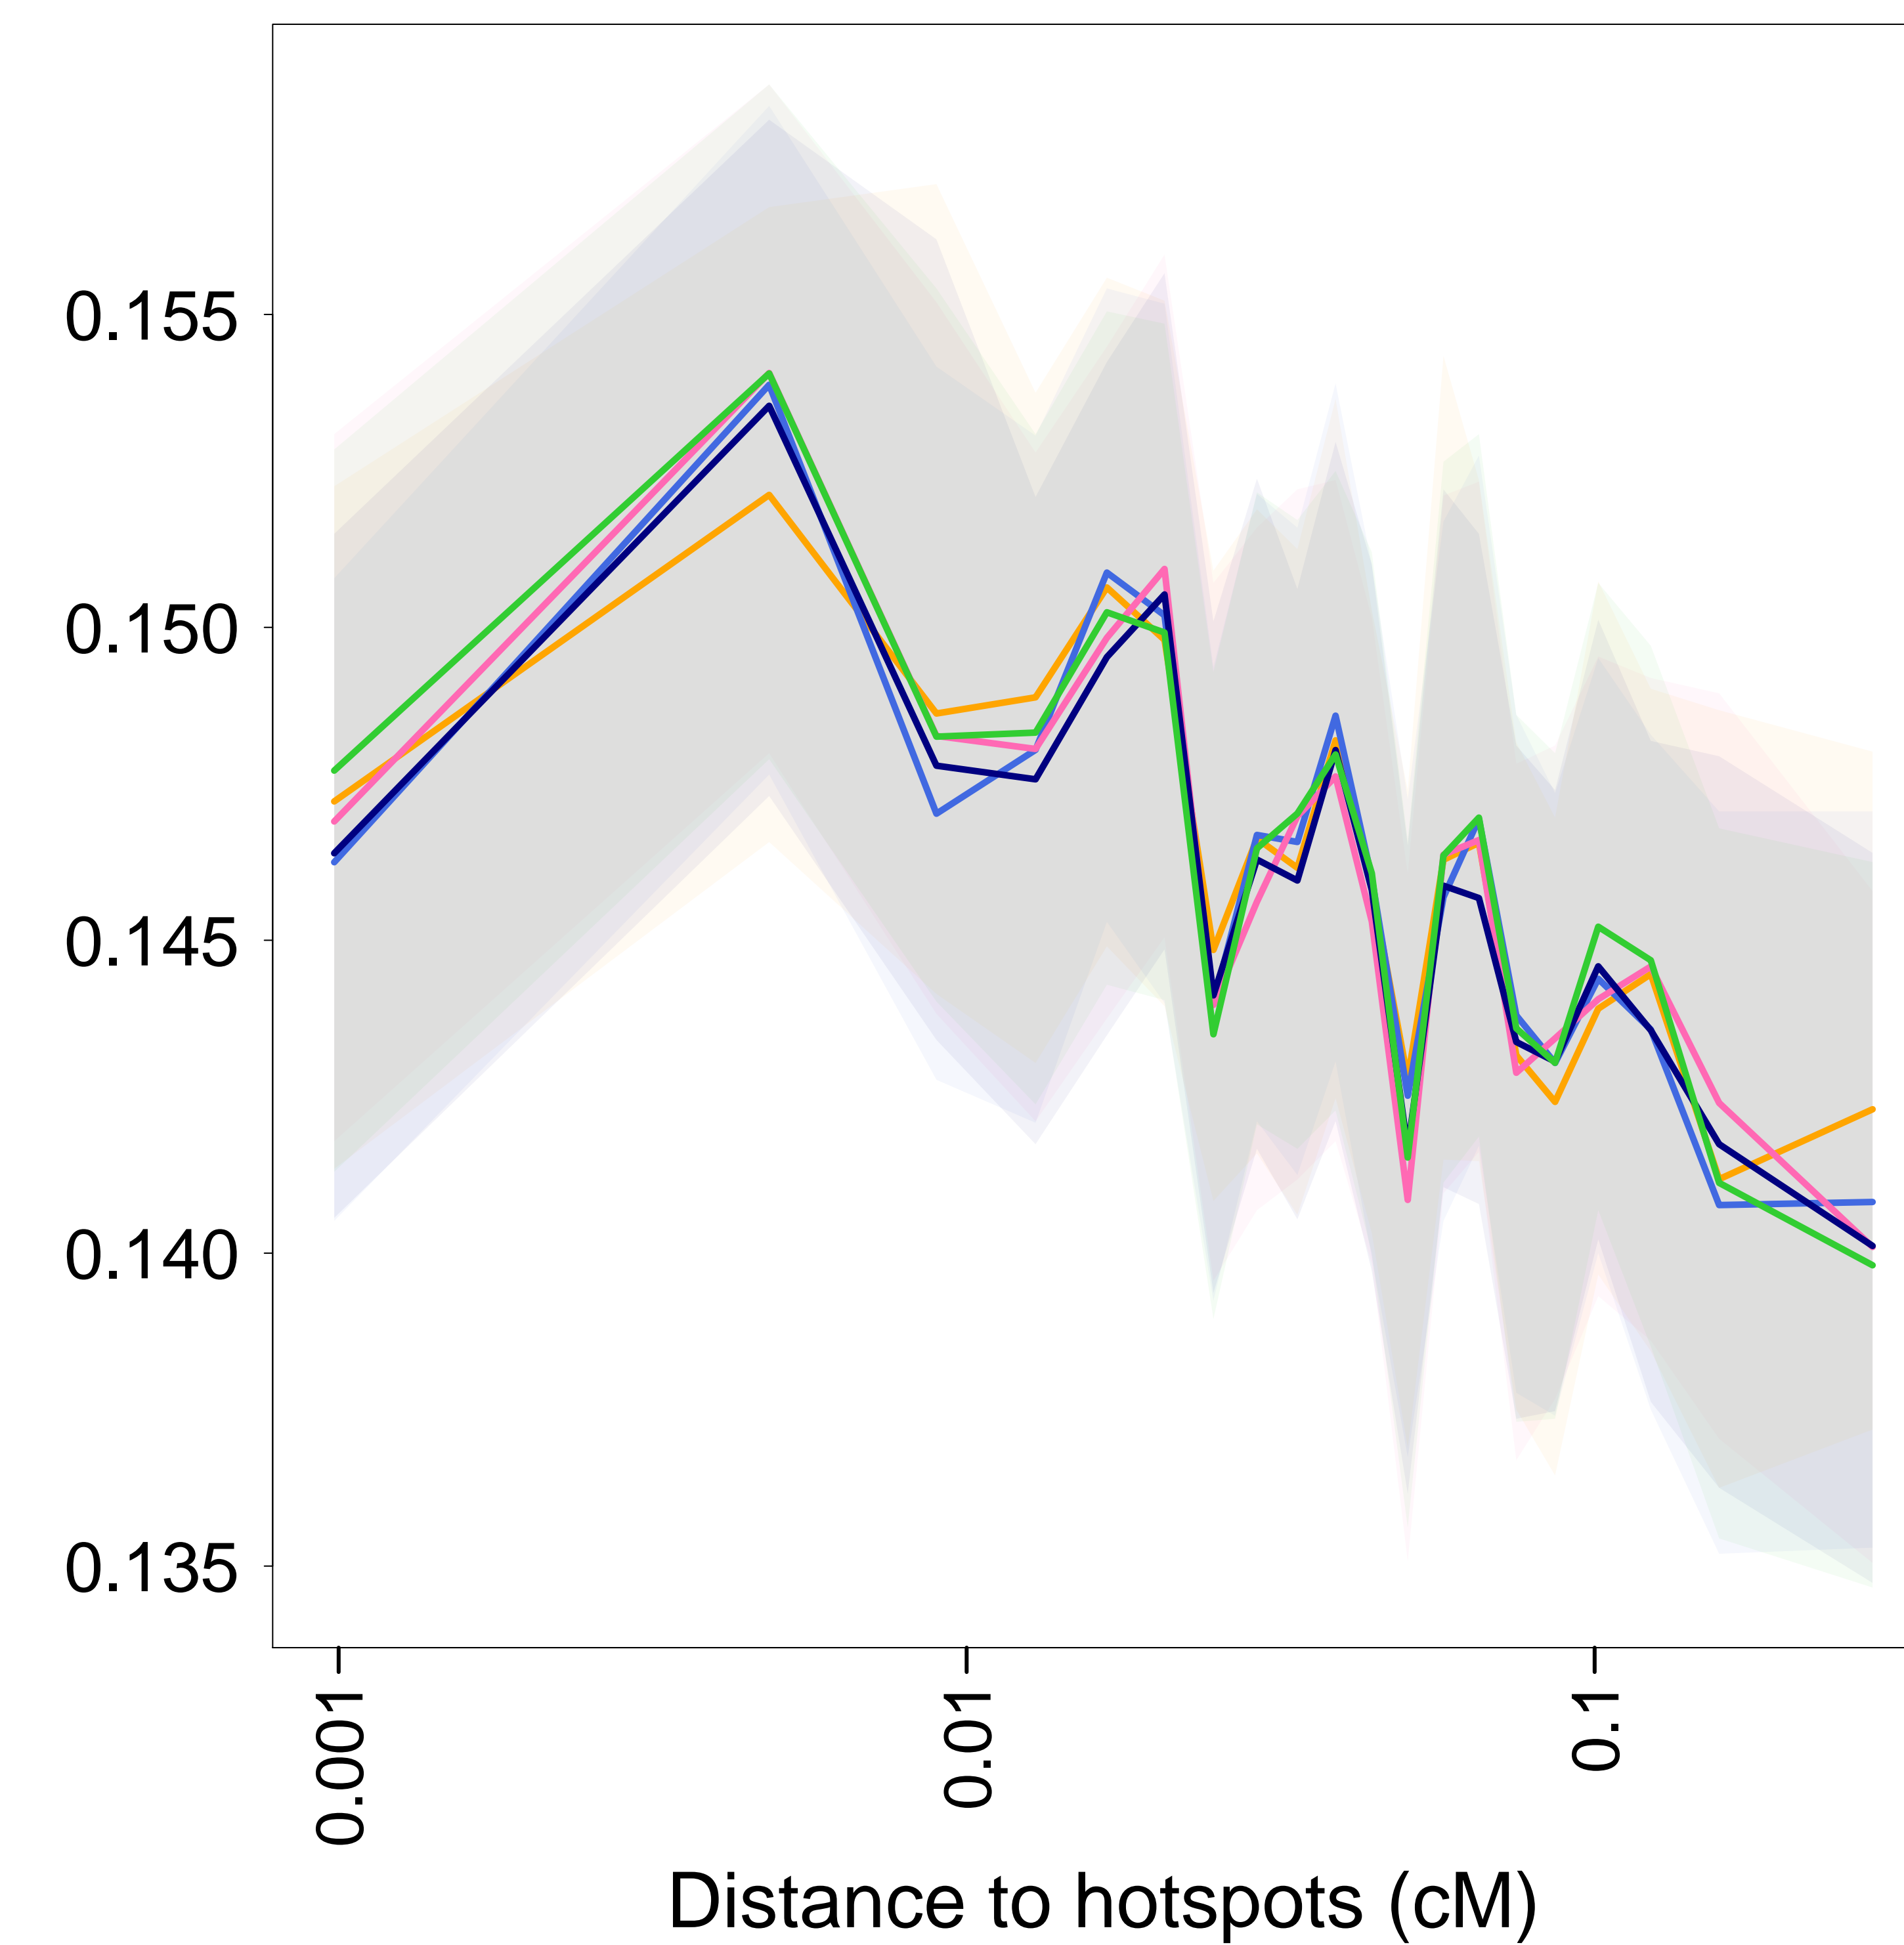**D**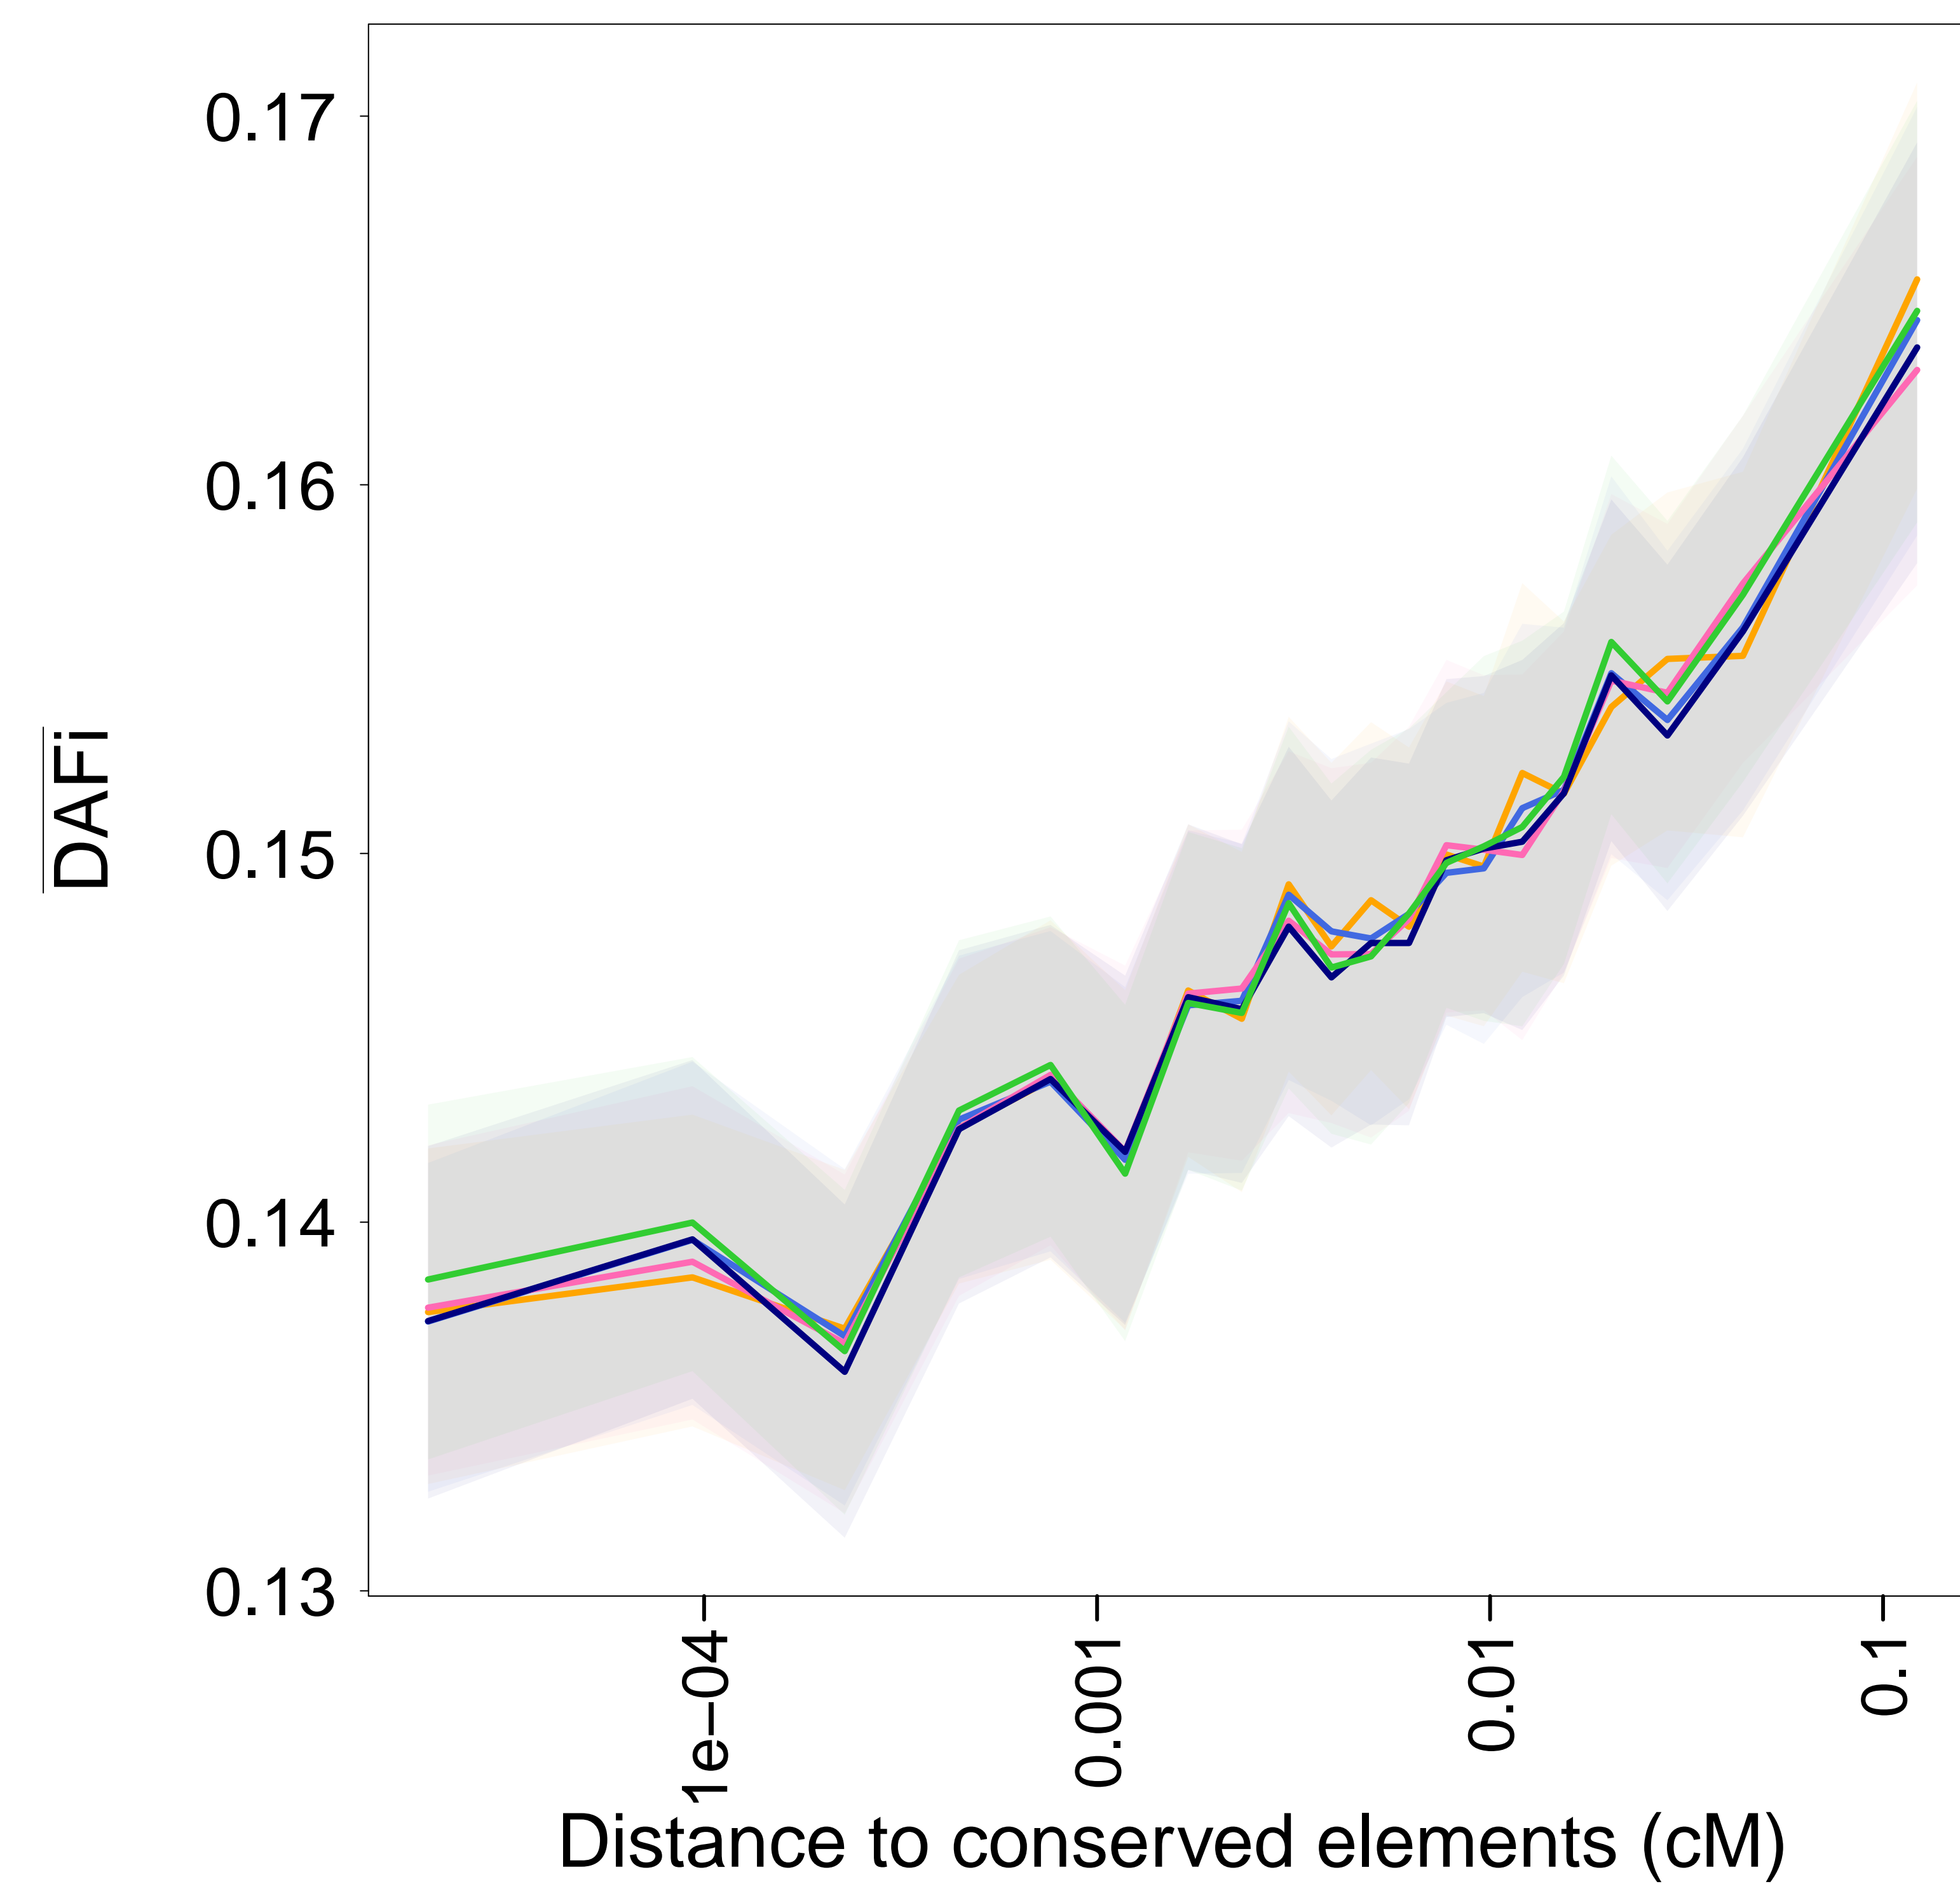**E**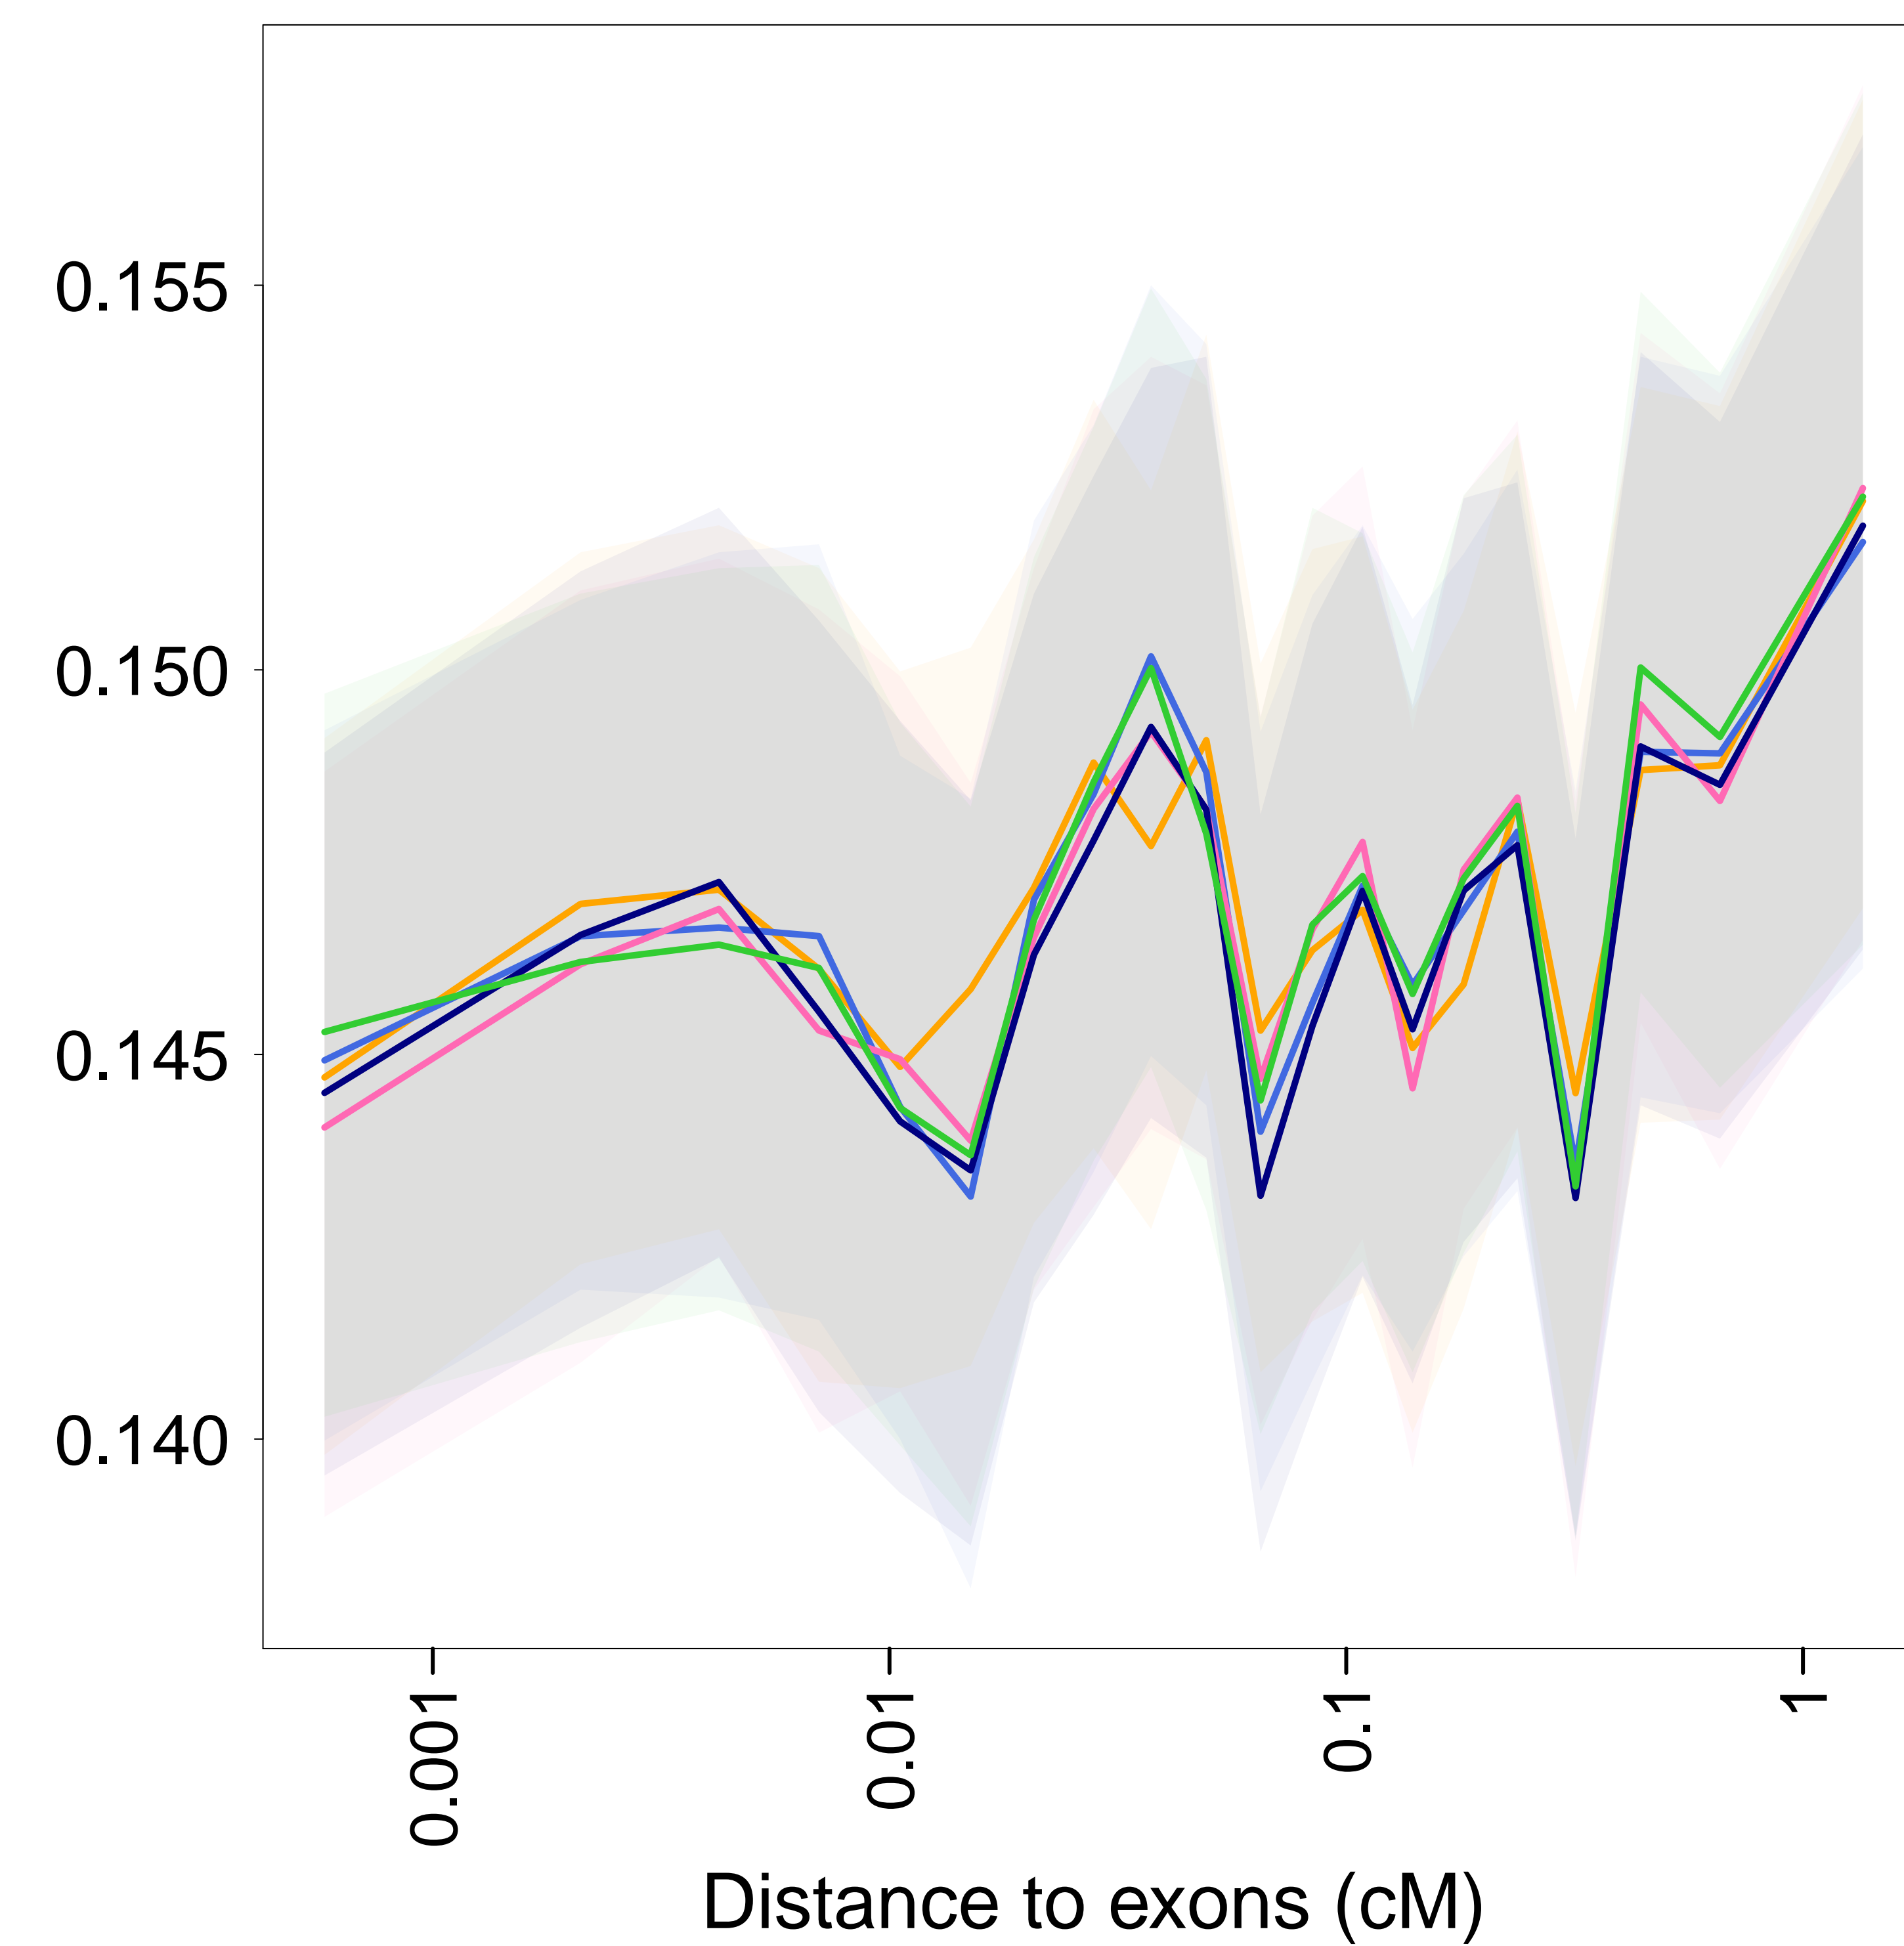

Supplement: supp [file elife-36317-supp-v2.zip]

**A**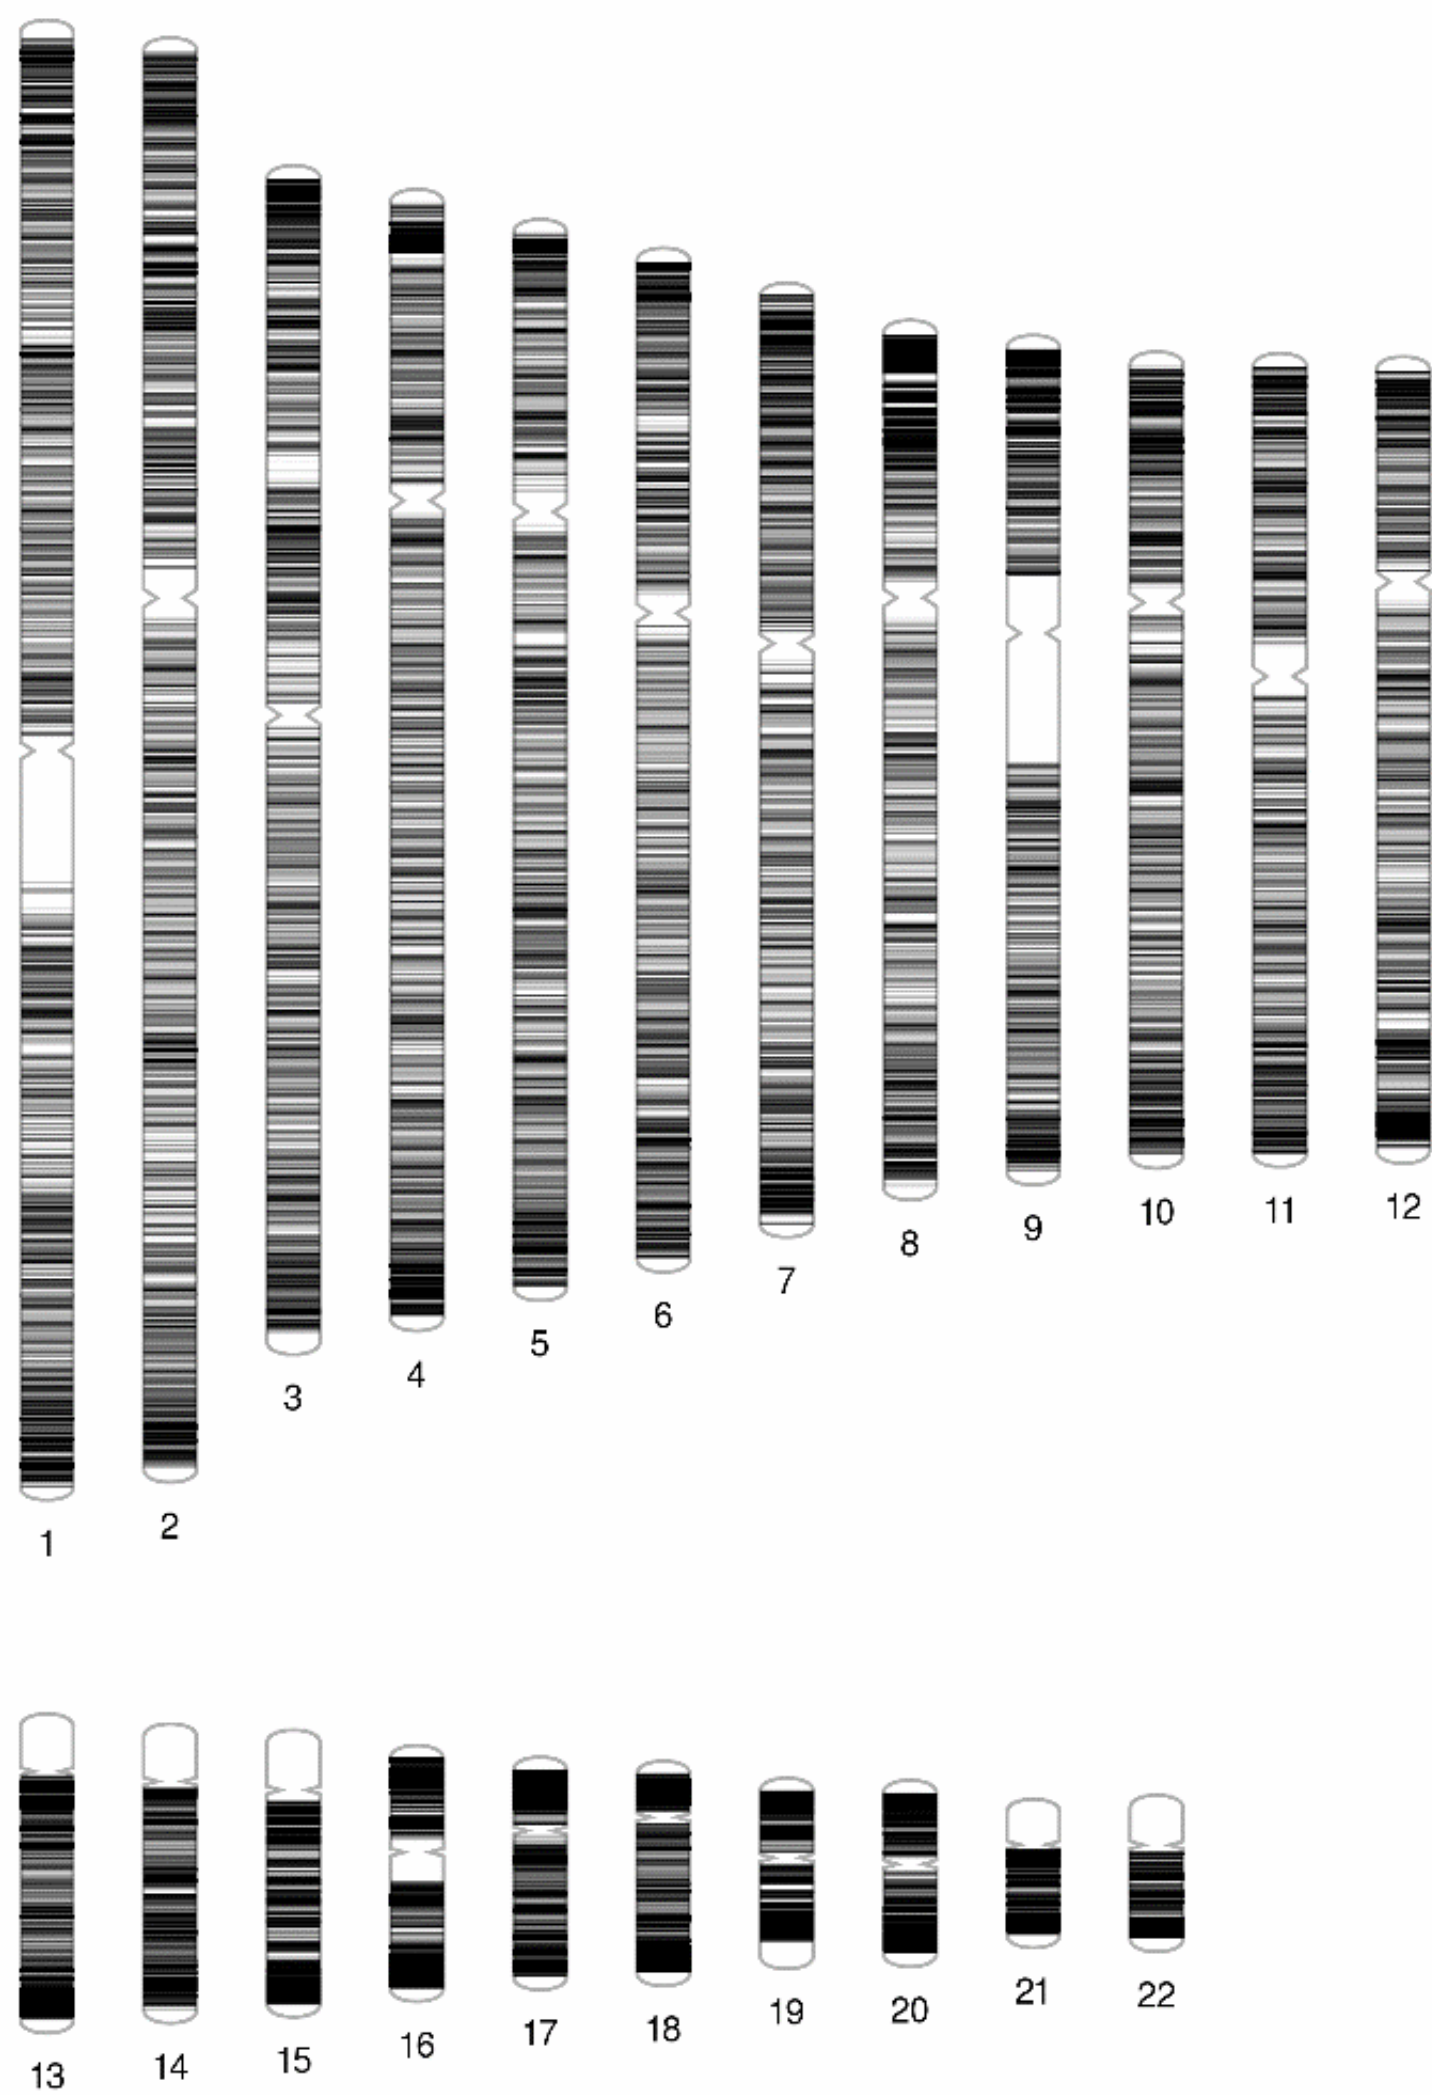**B**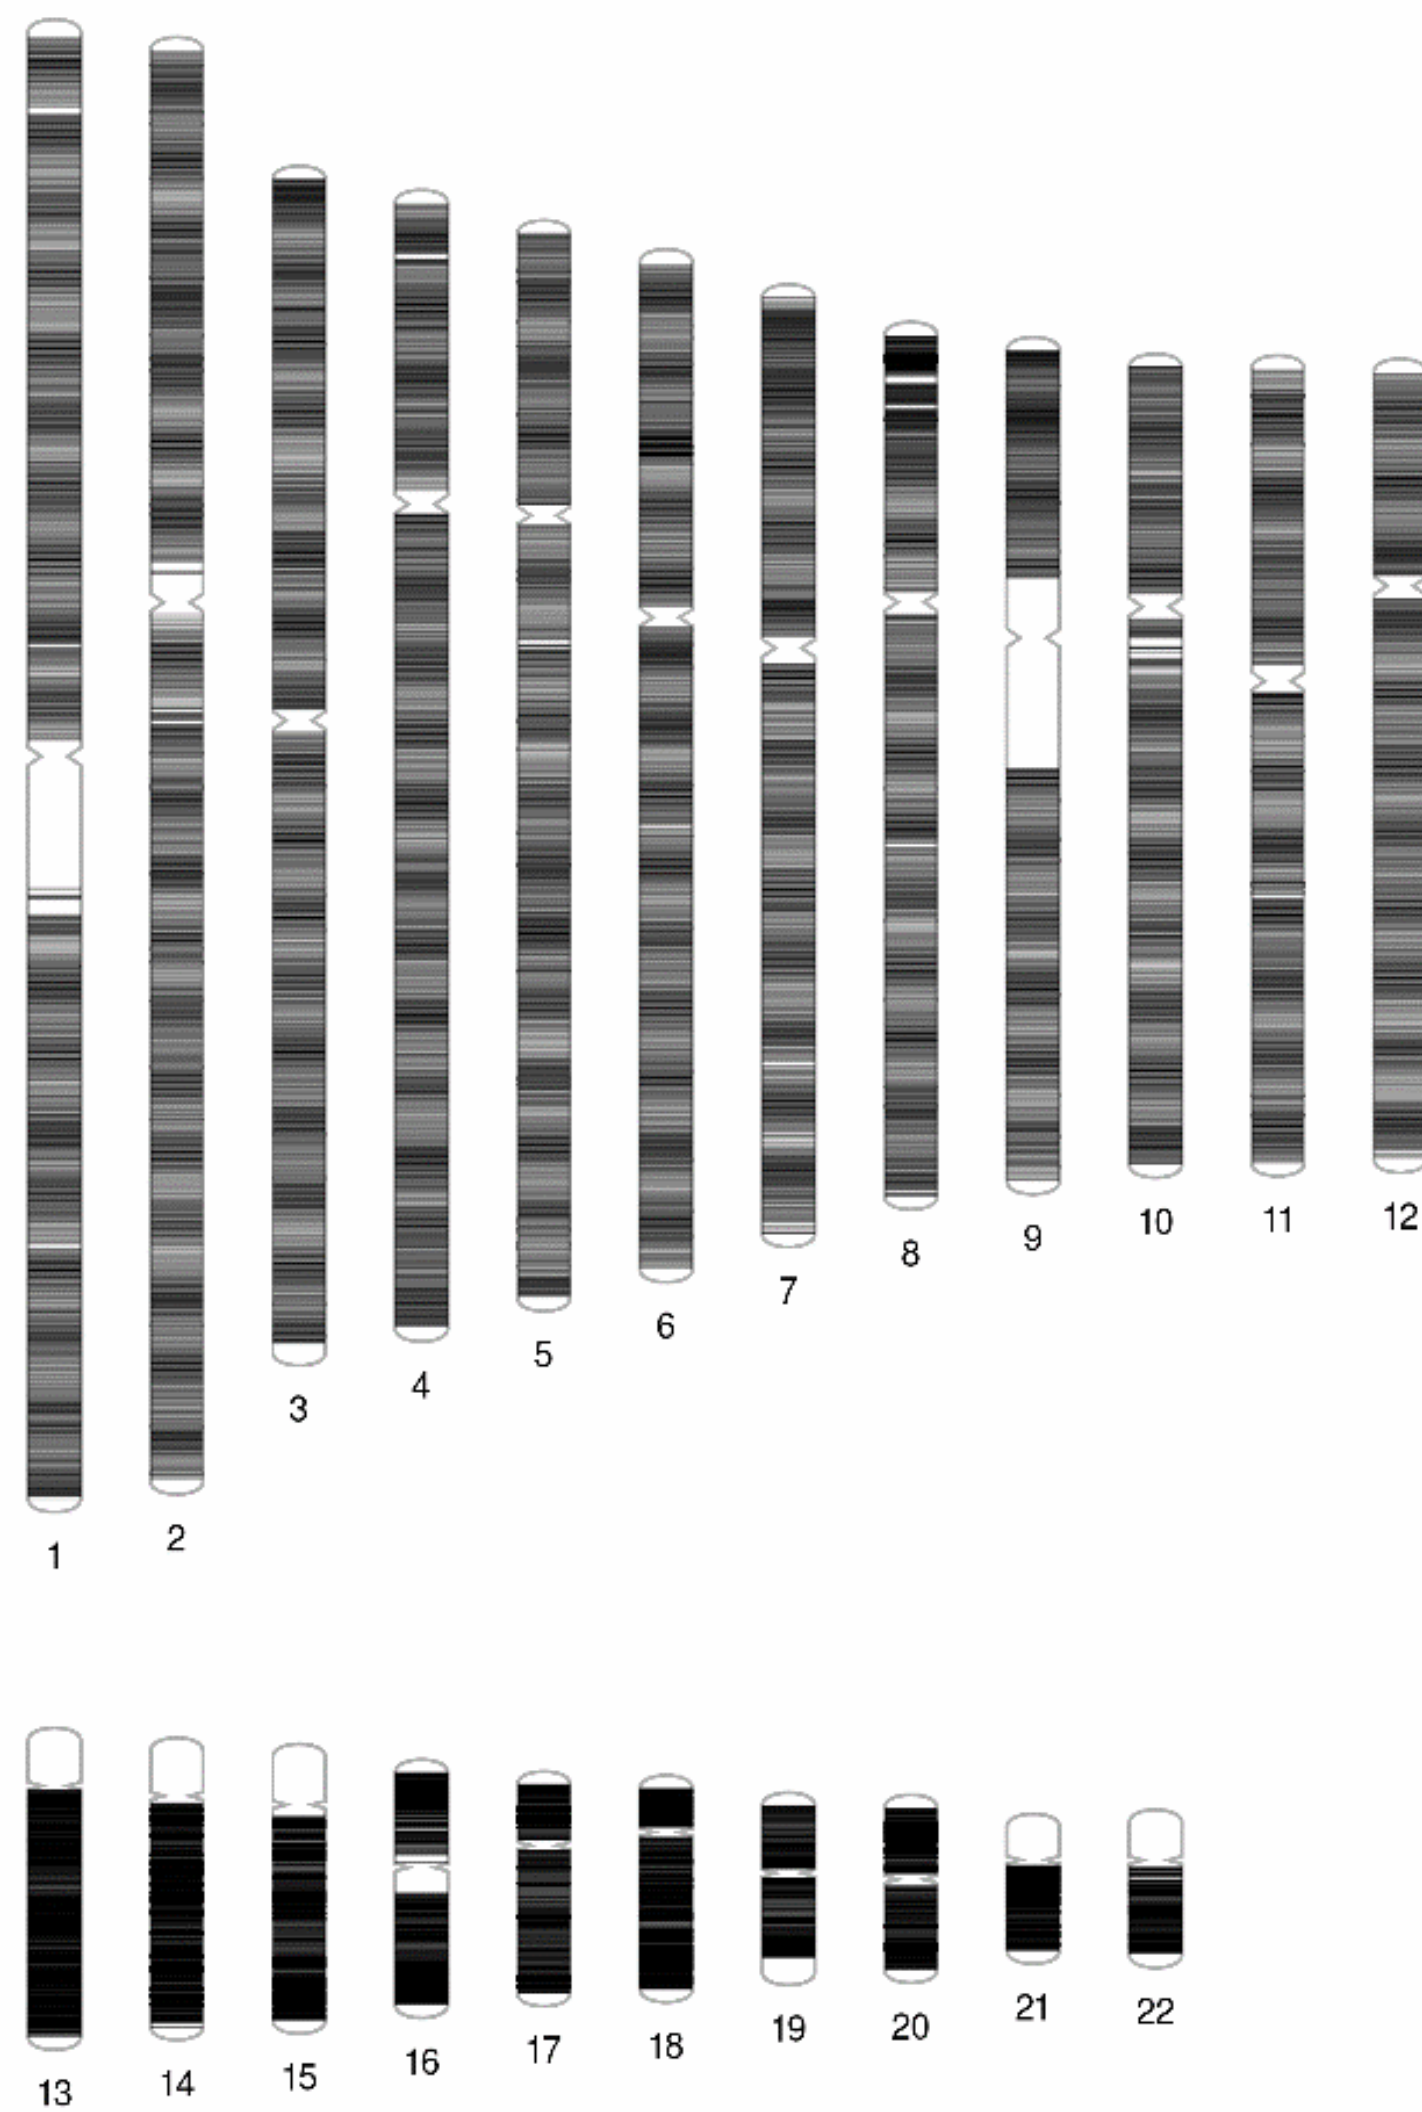

Supplement: supp [file elife-36317-supp-v2.zip]

**A**

All SNPs

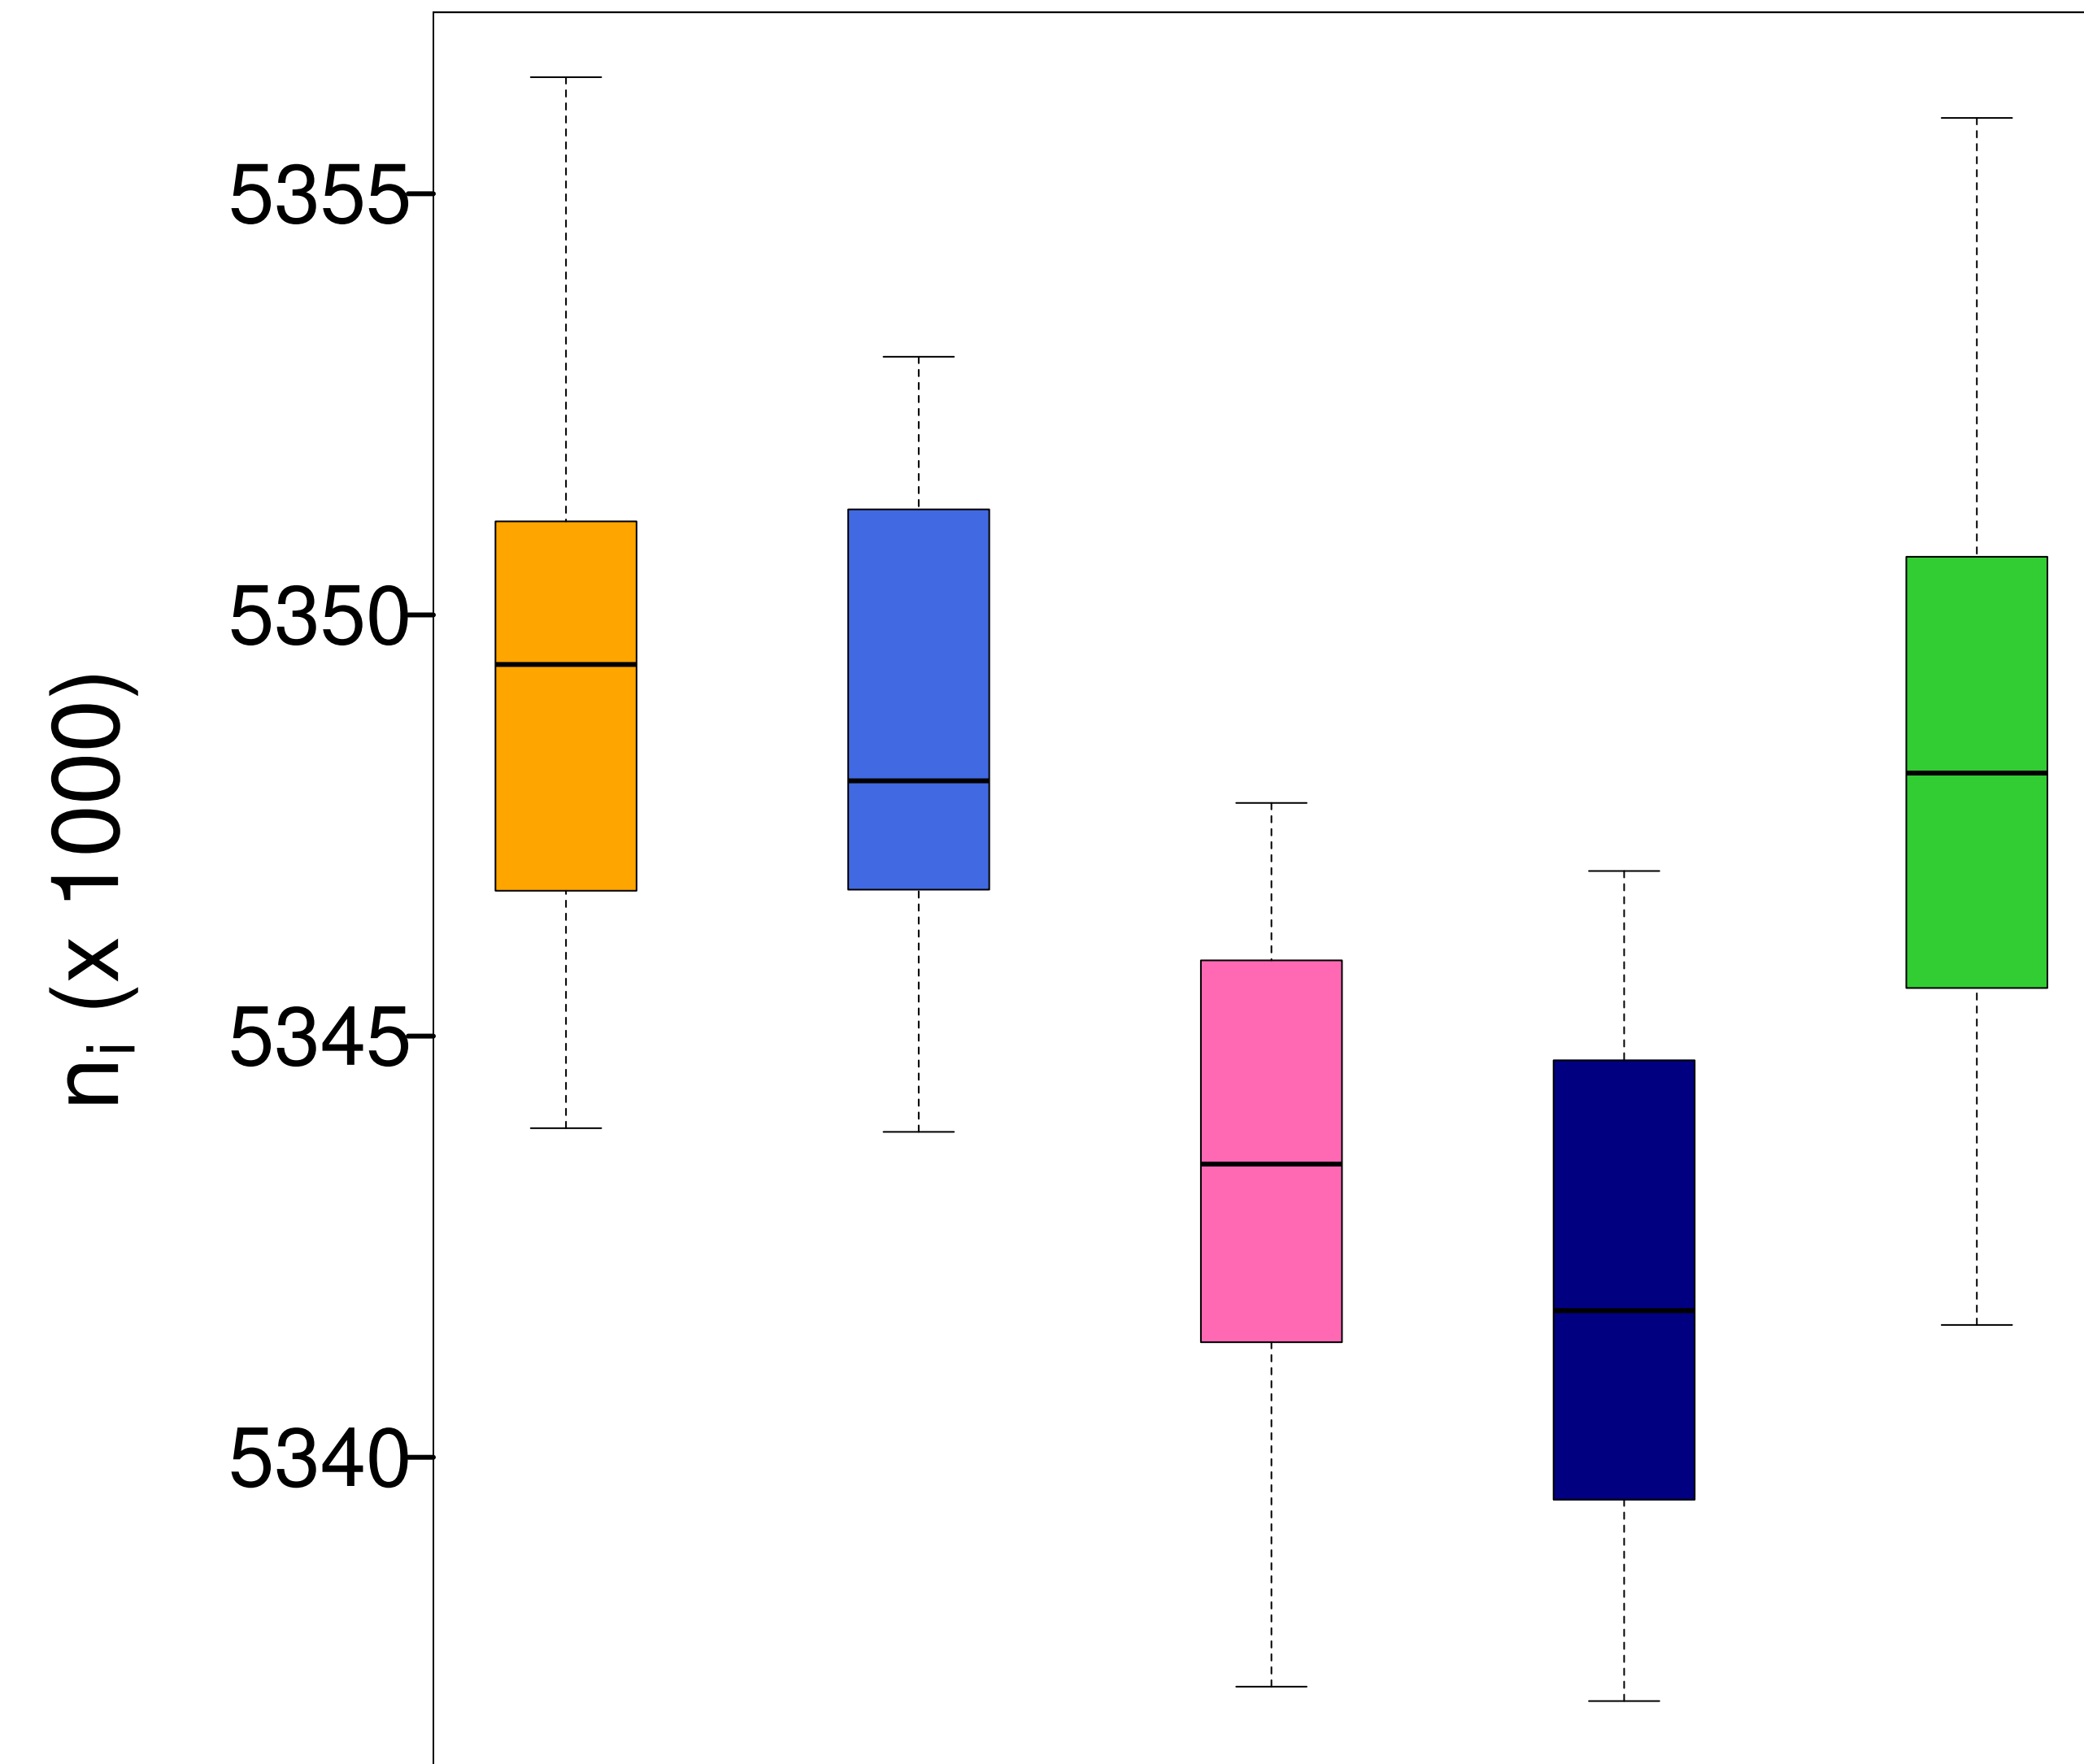**B**

Synonymous

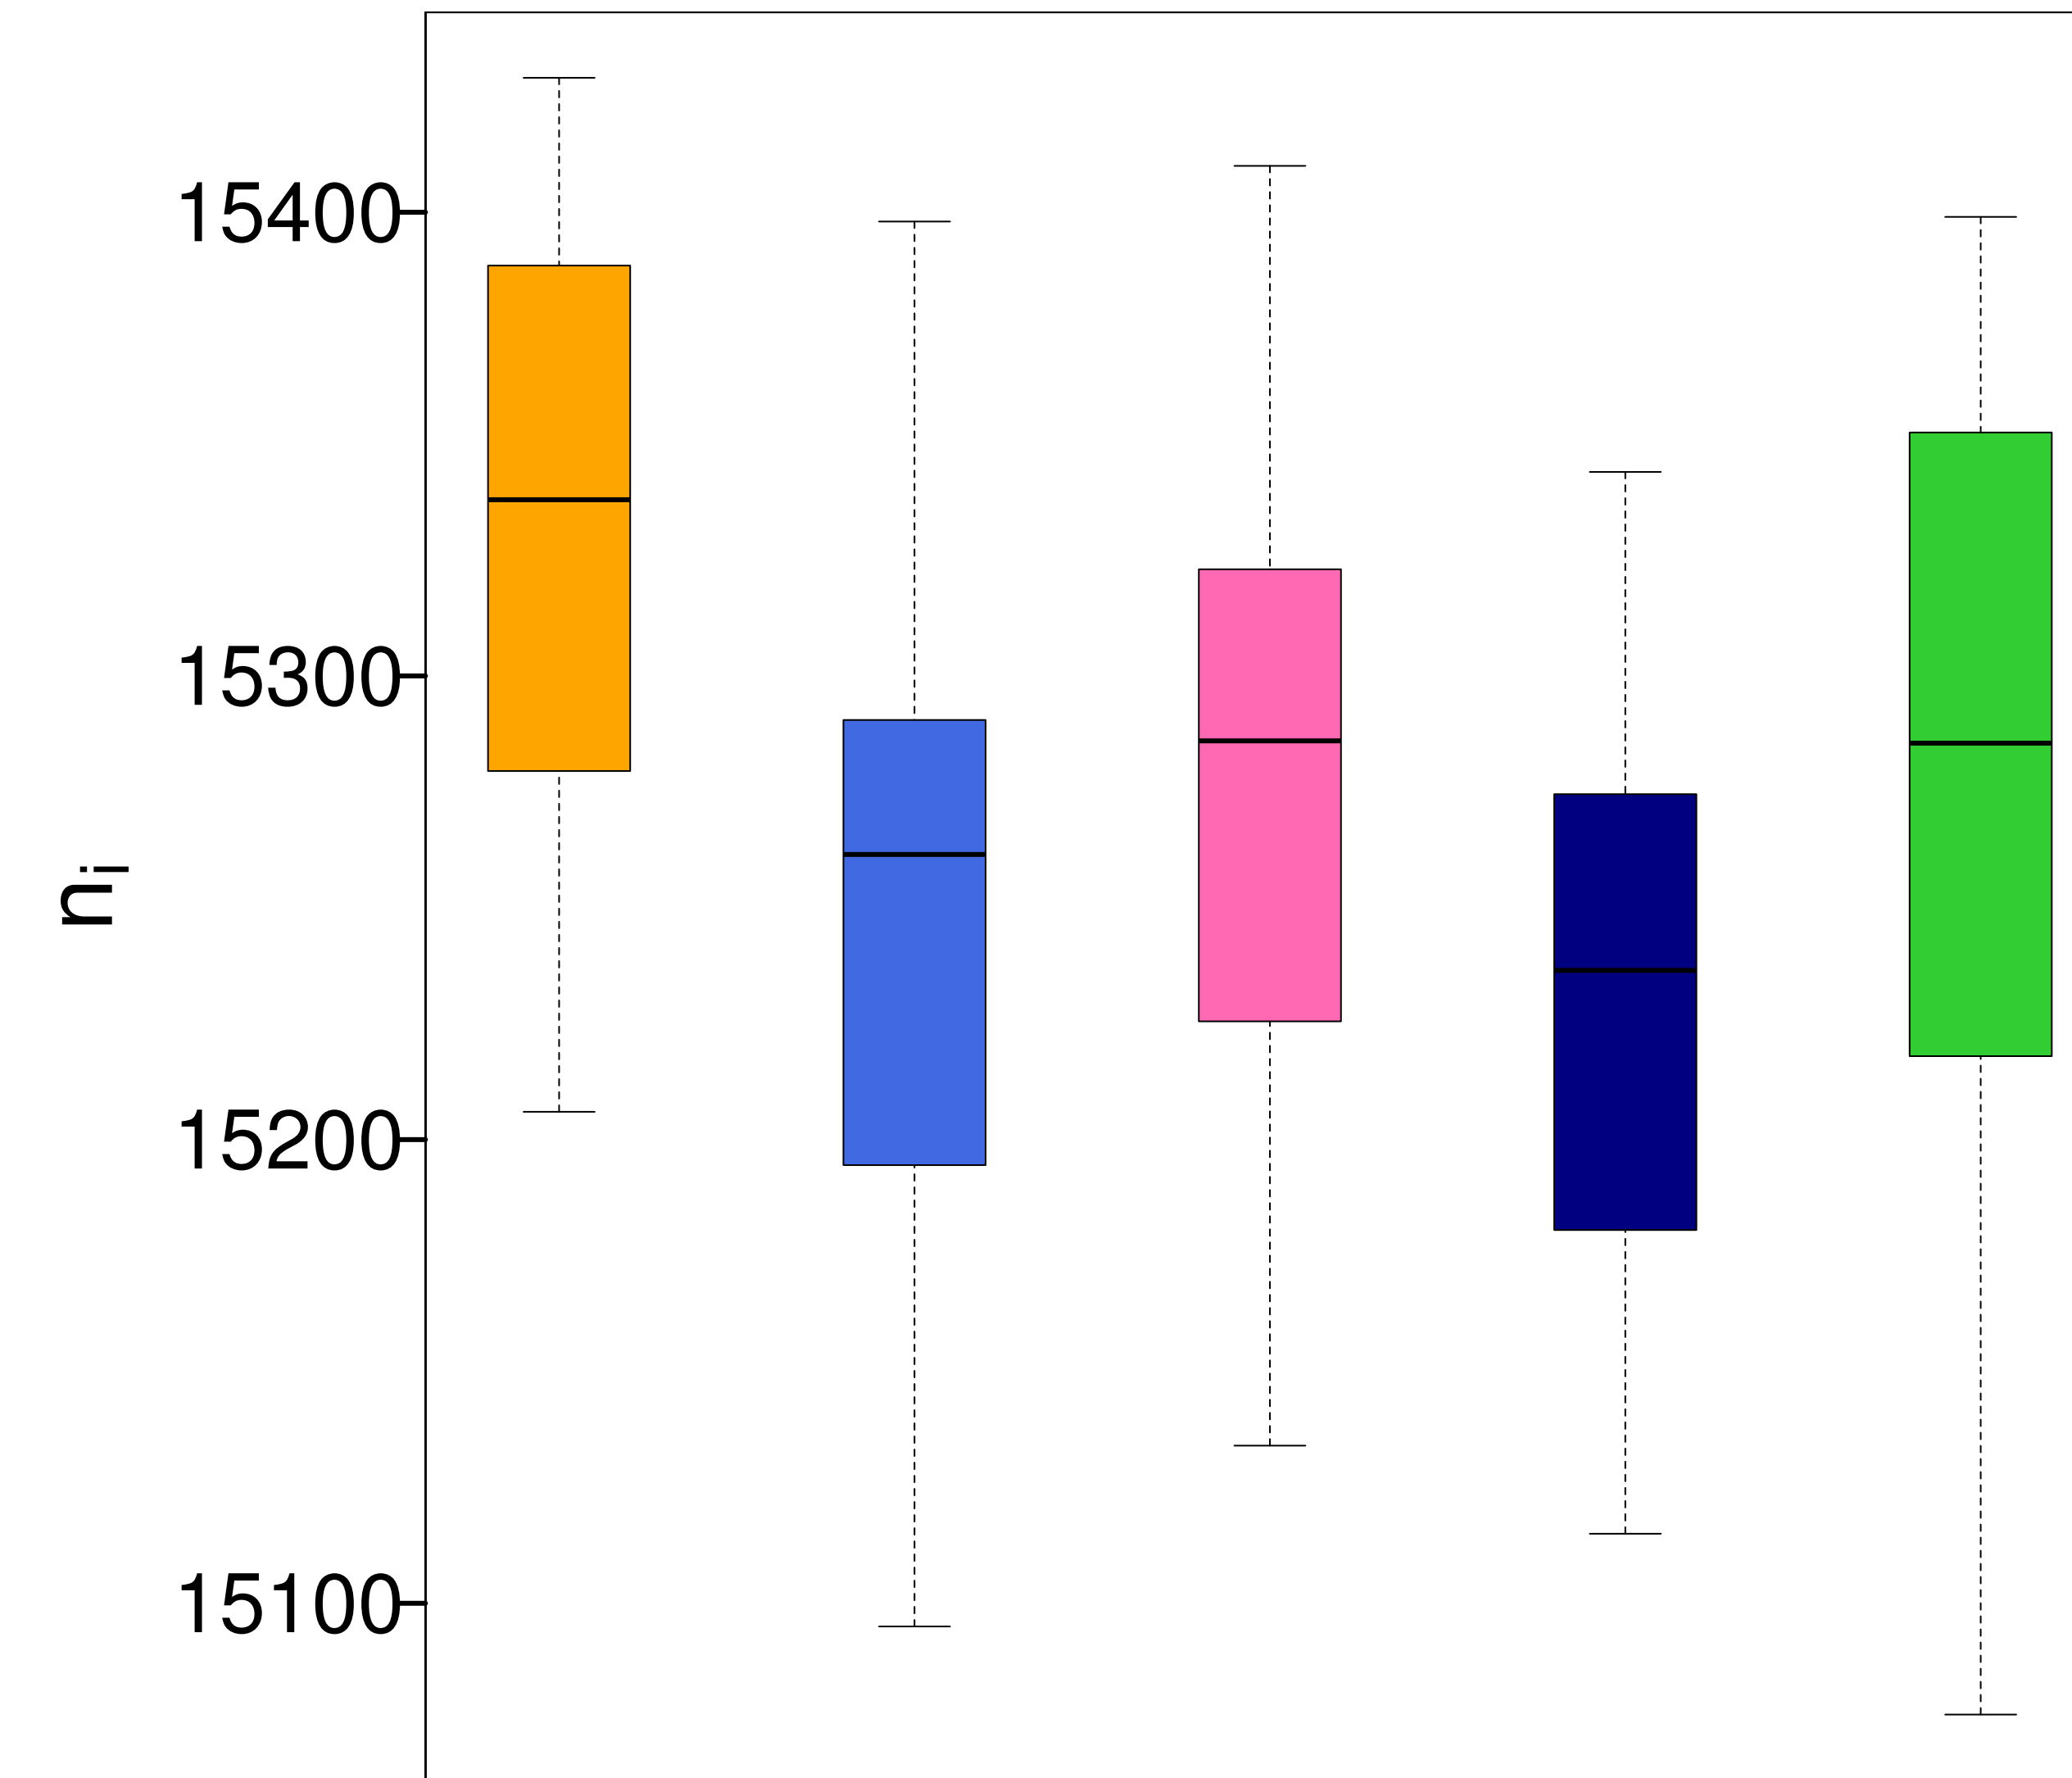**C**

Nonsynonymous

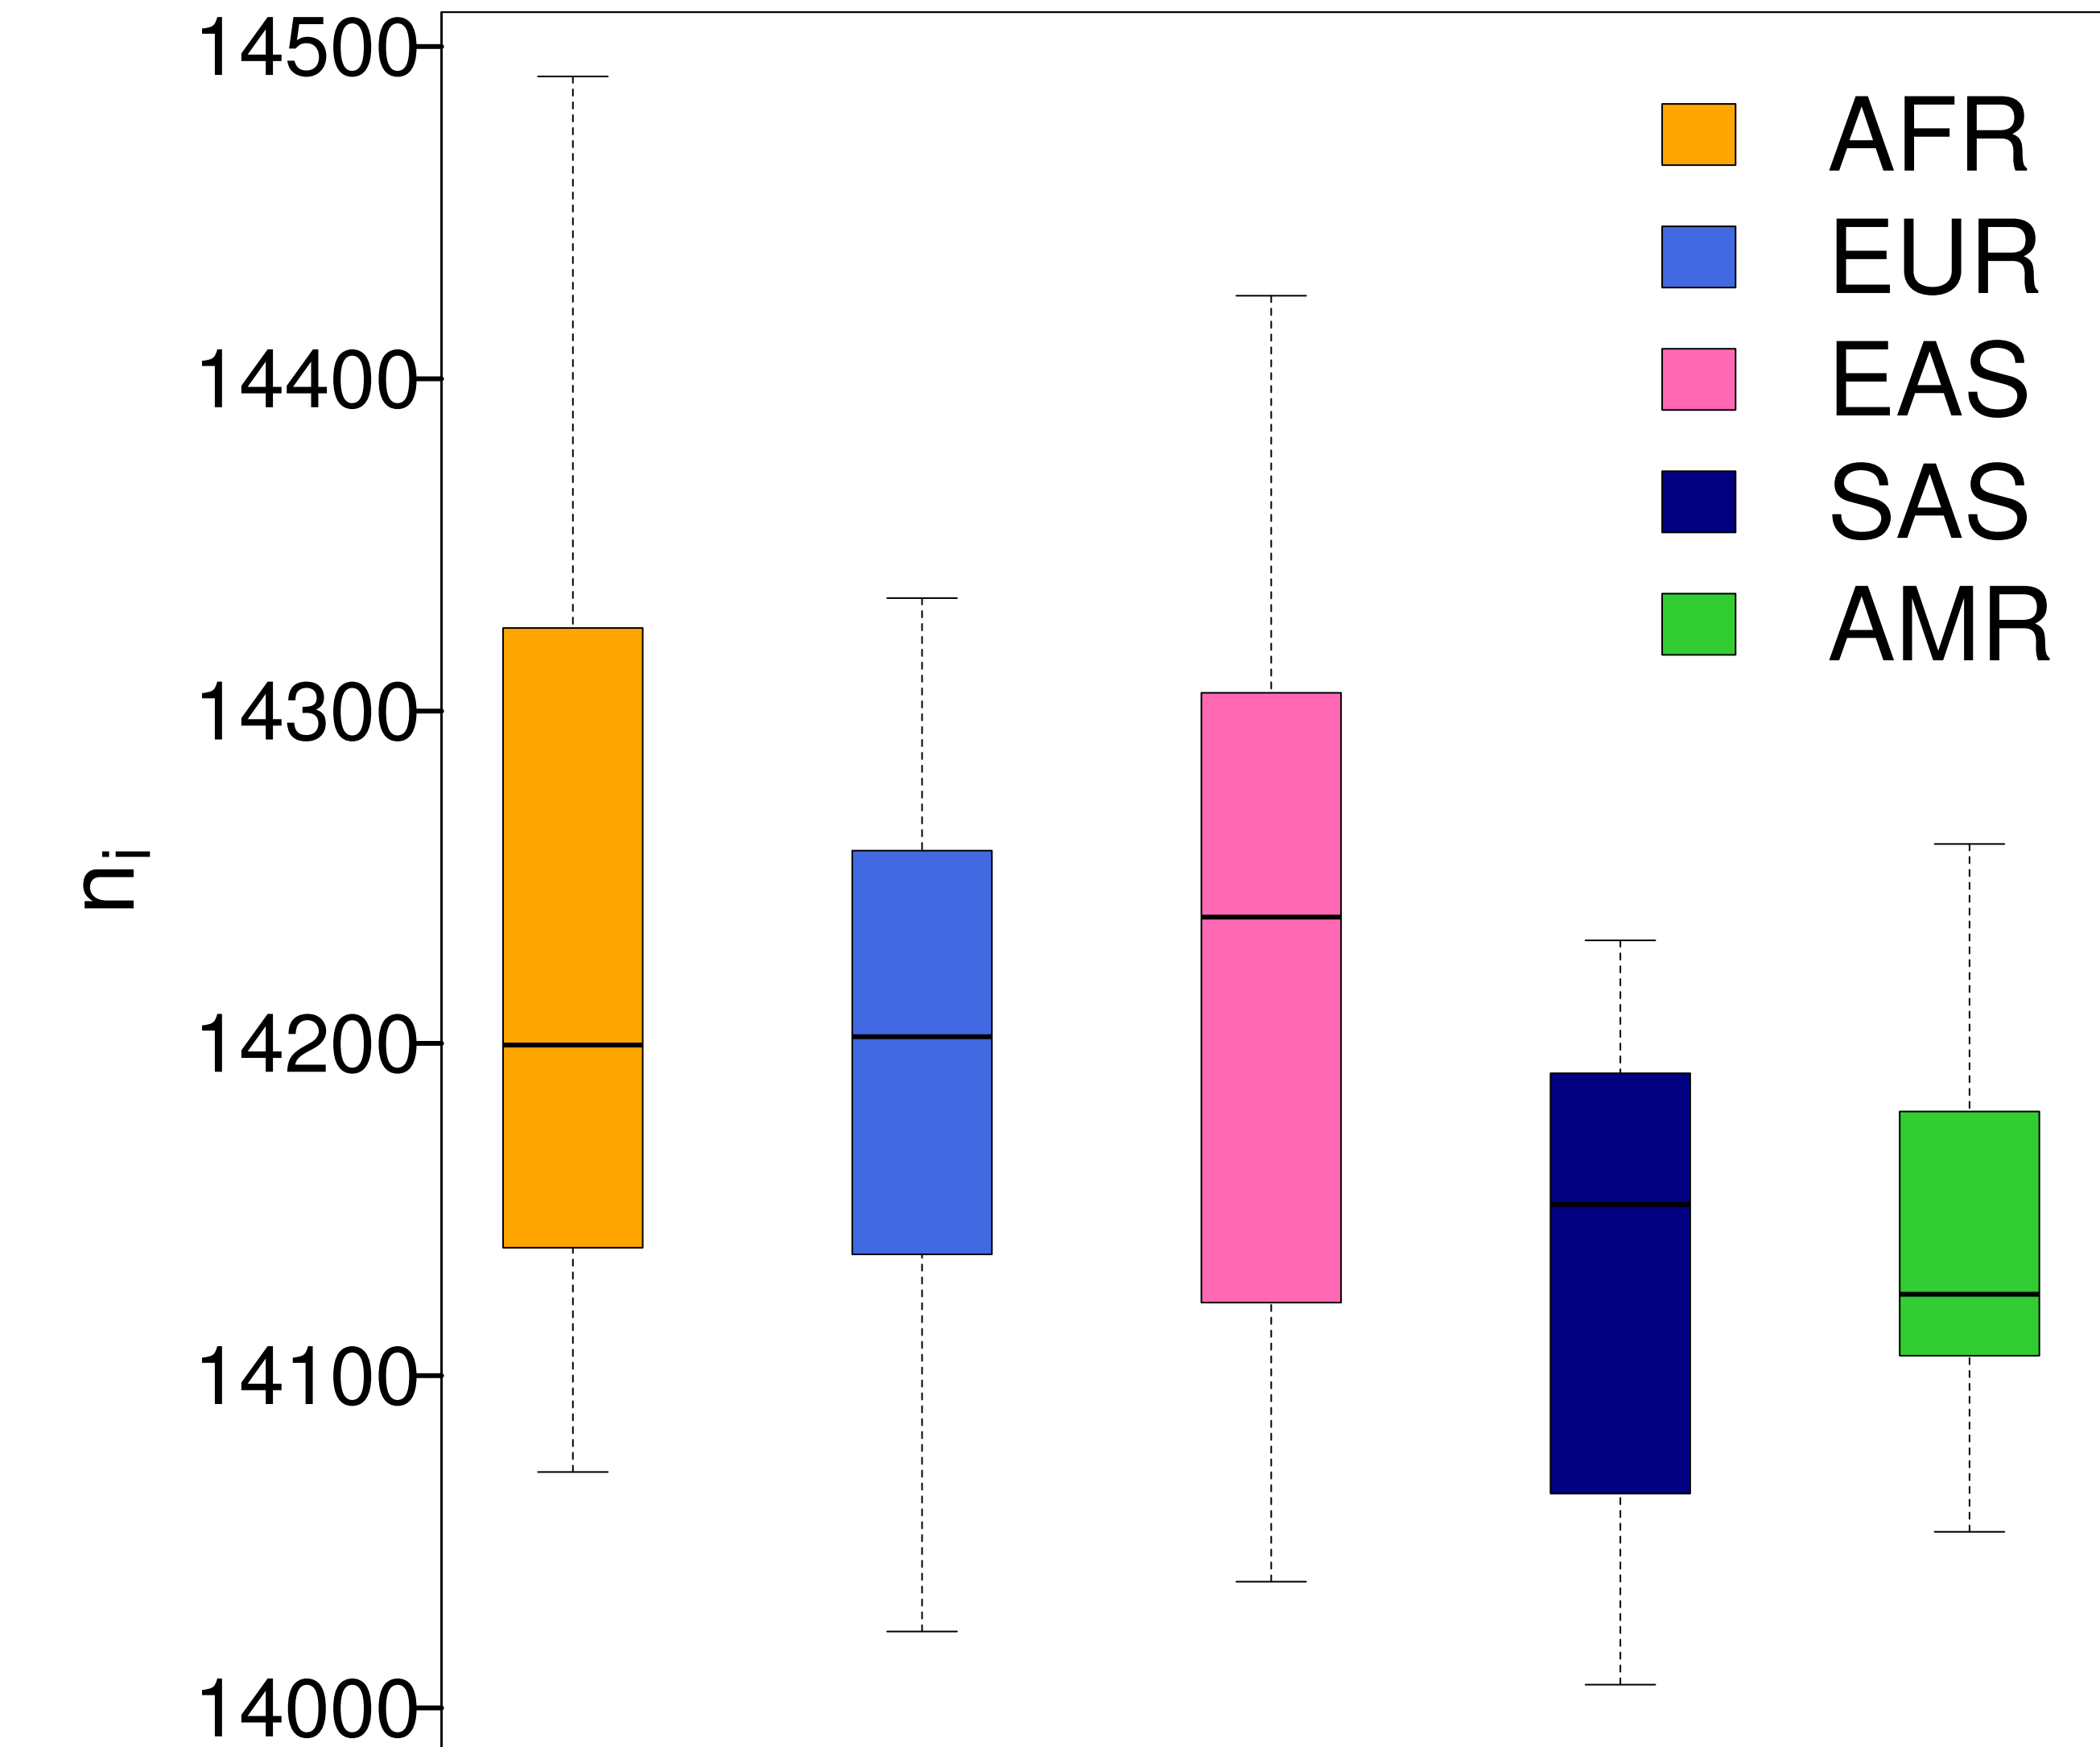**D**All WW+SS  $\geq 1.5$  cM/Mb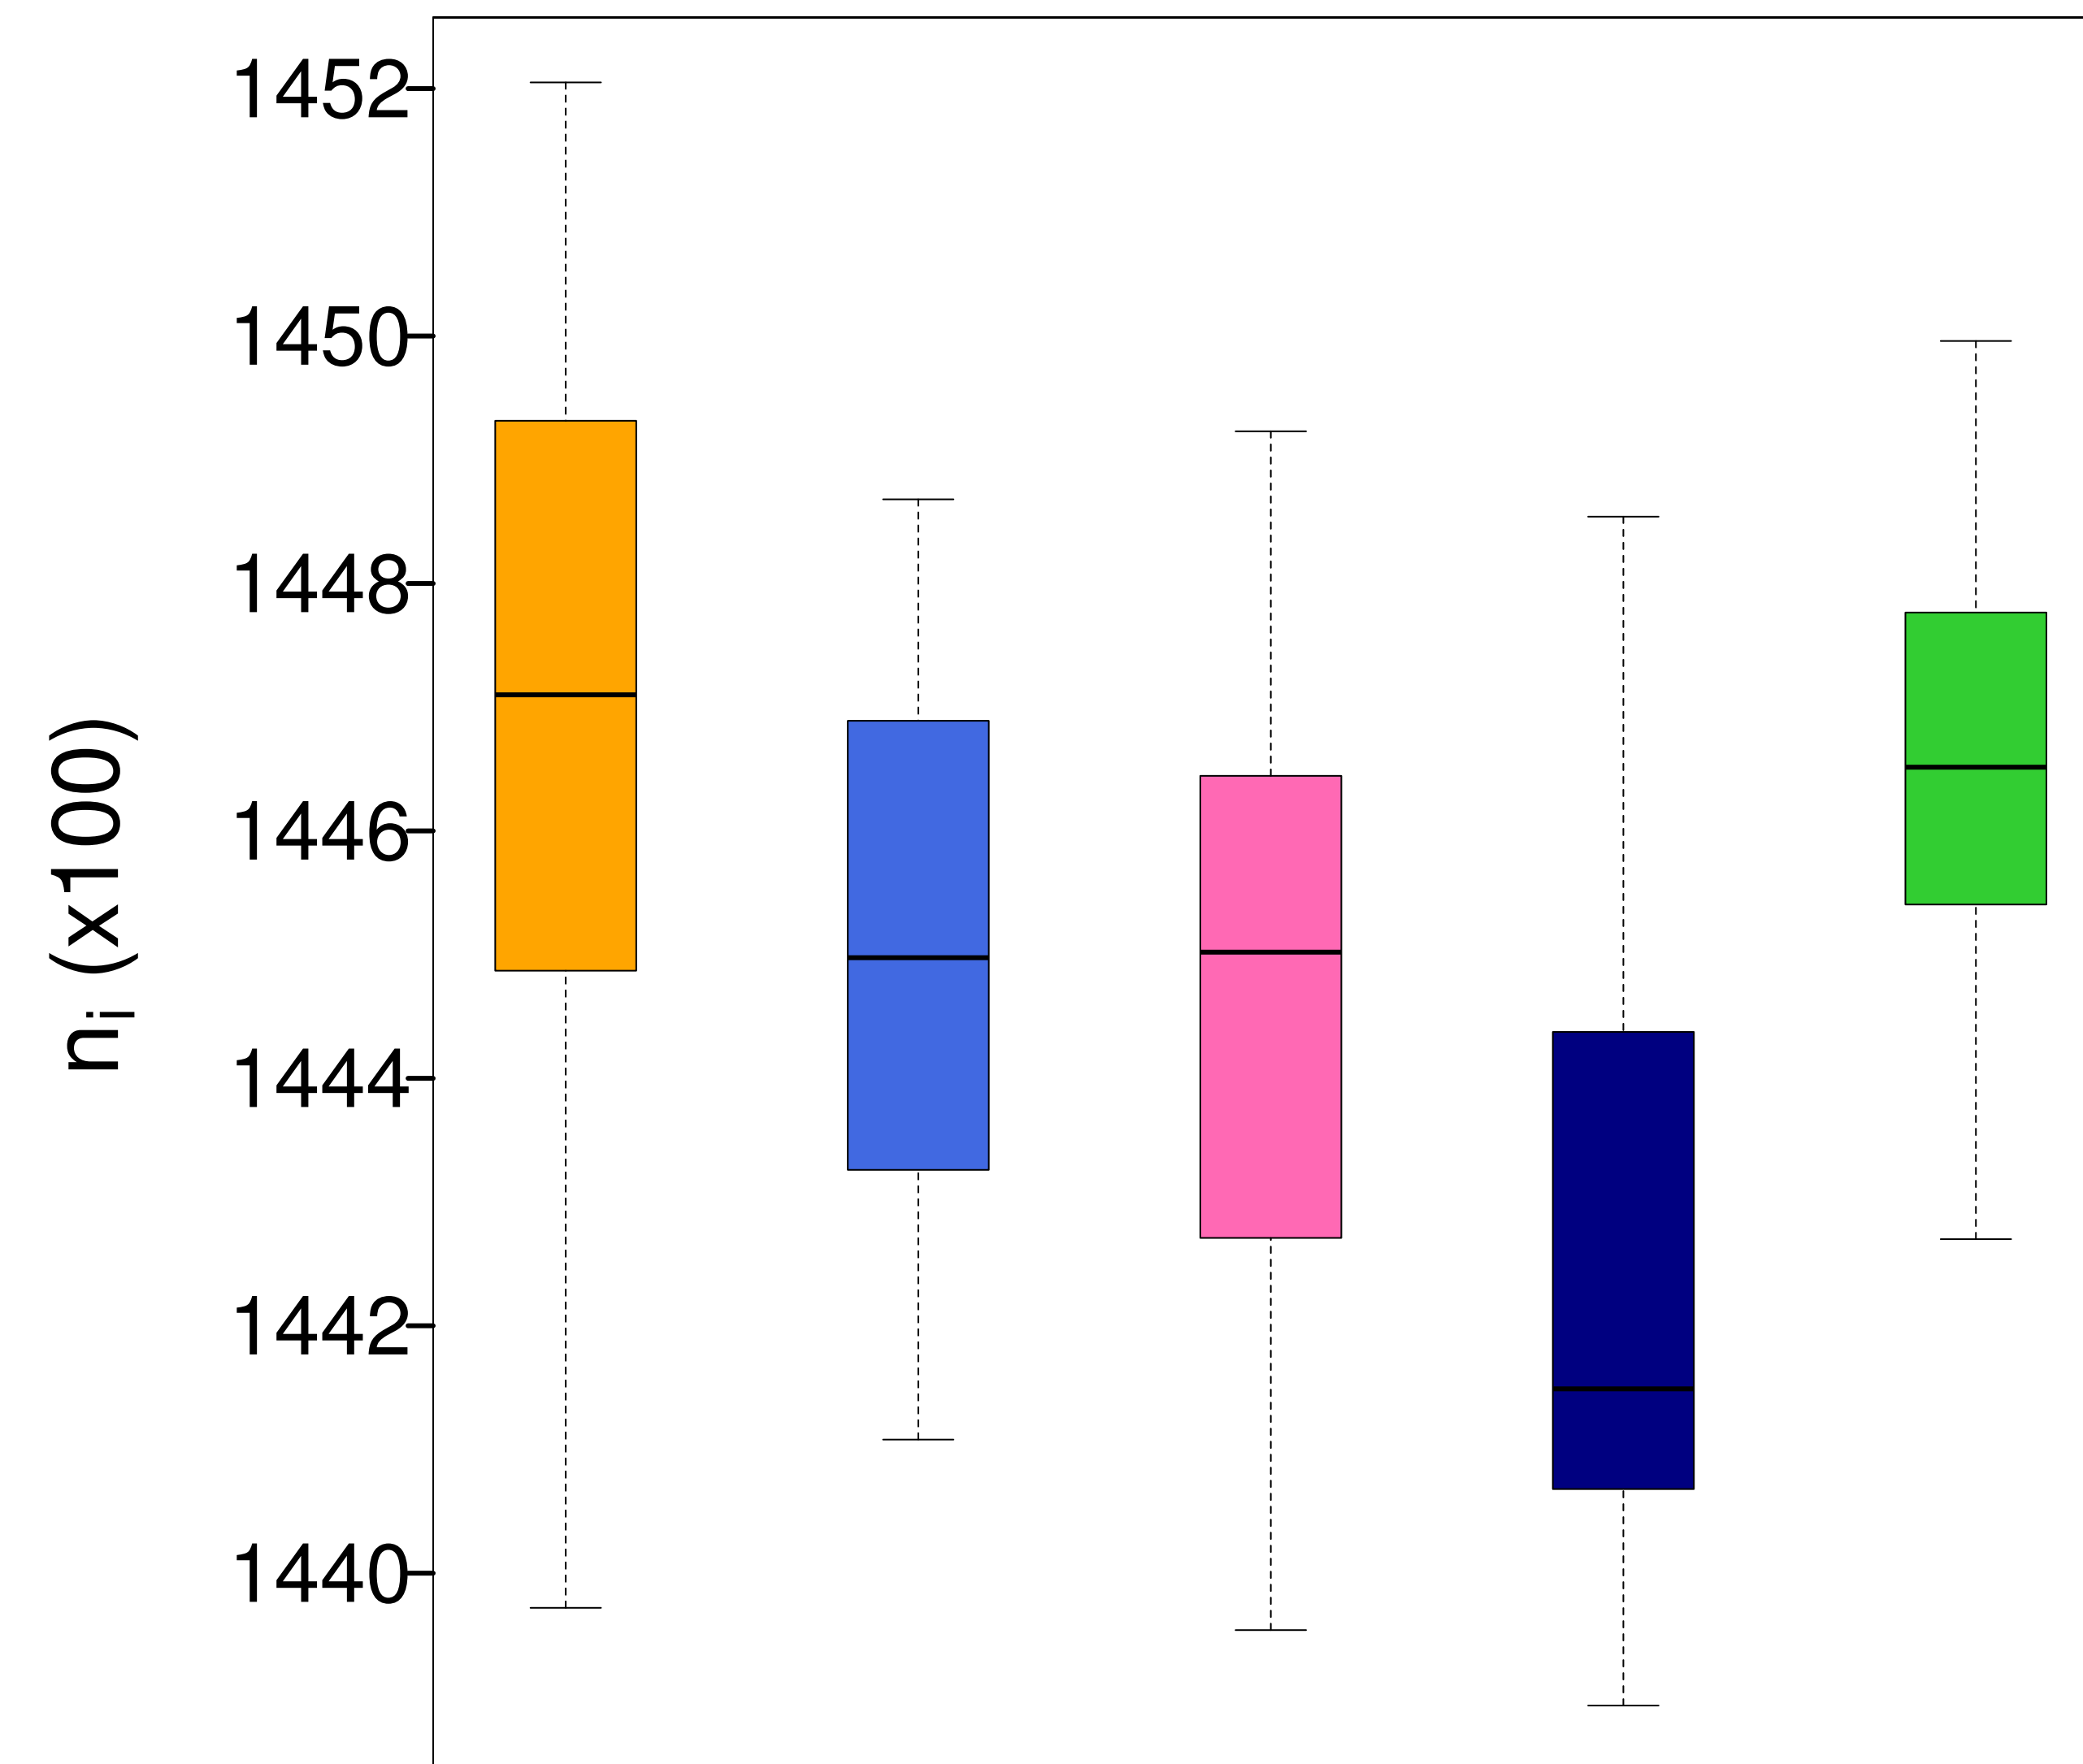**E**TR WW+SS  $\geq 1.5$  cM/Mb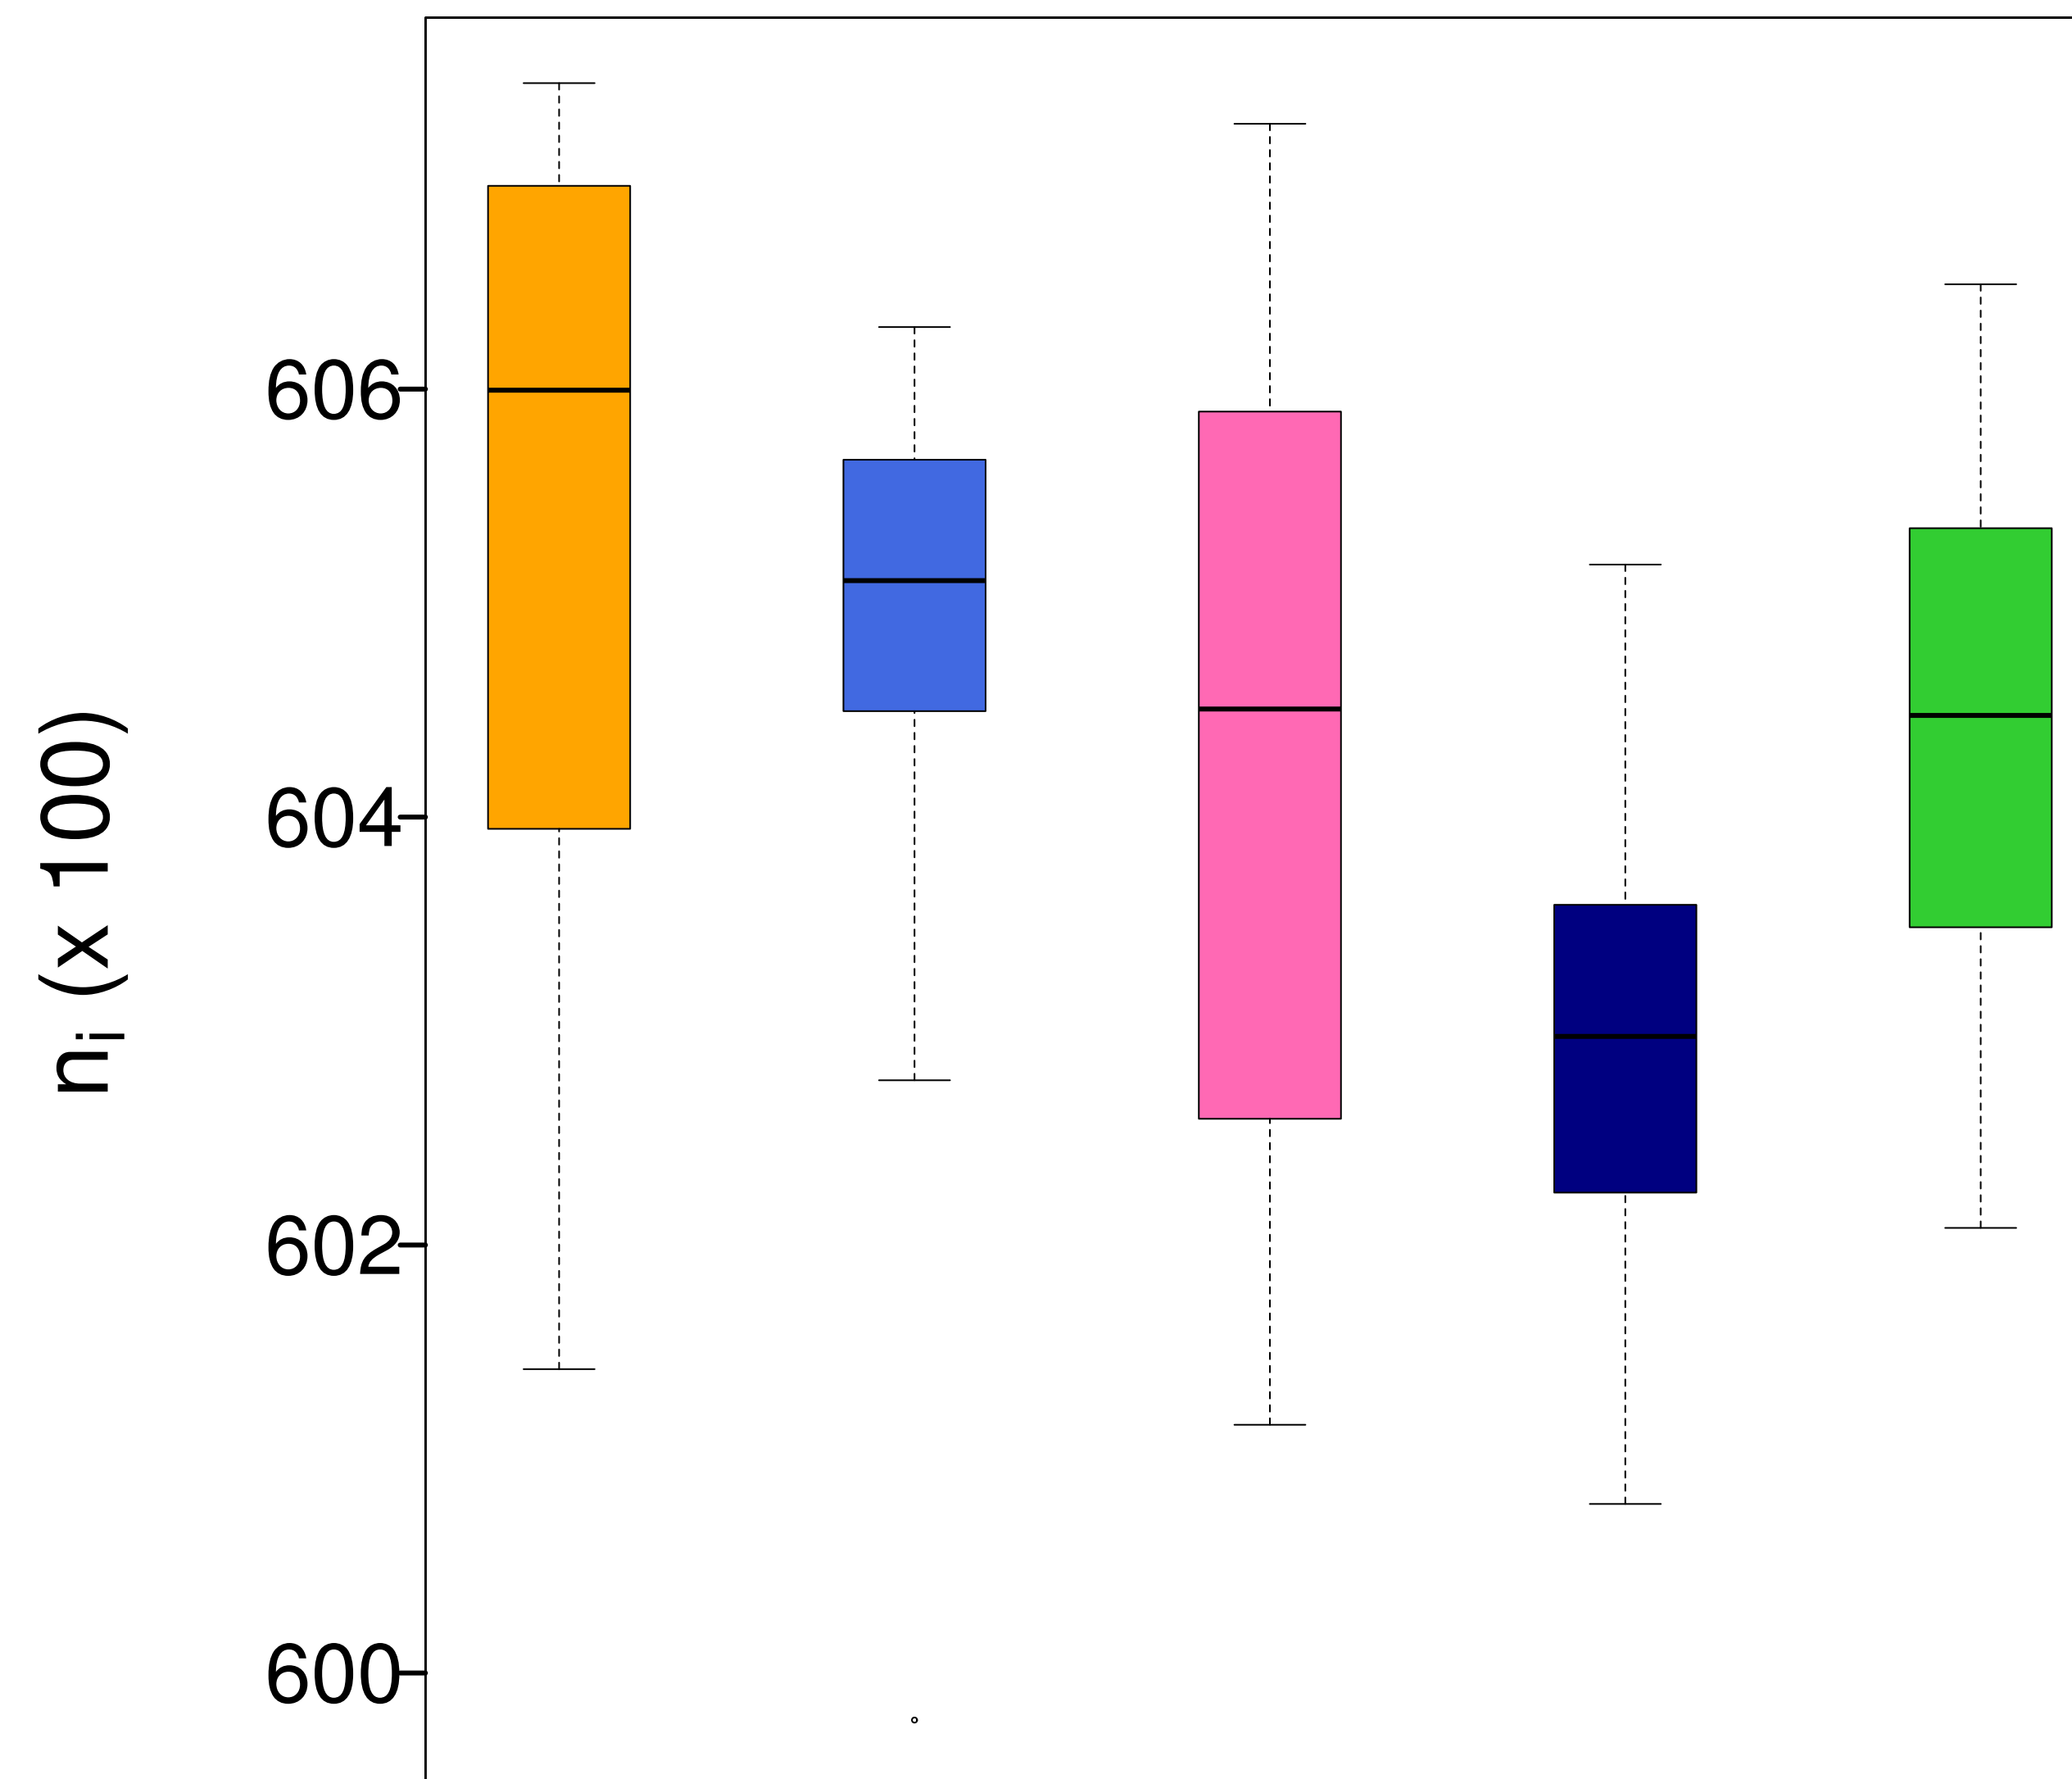**F**NTR-50kb WW+SS  $\geq 1.5$  cM/Mb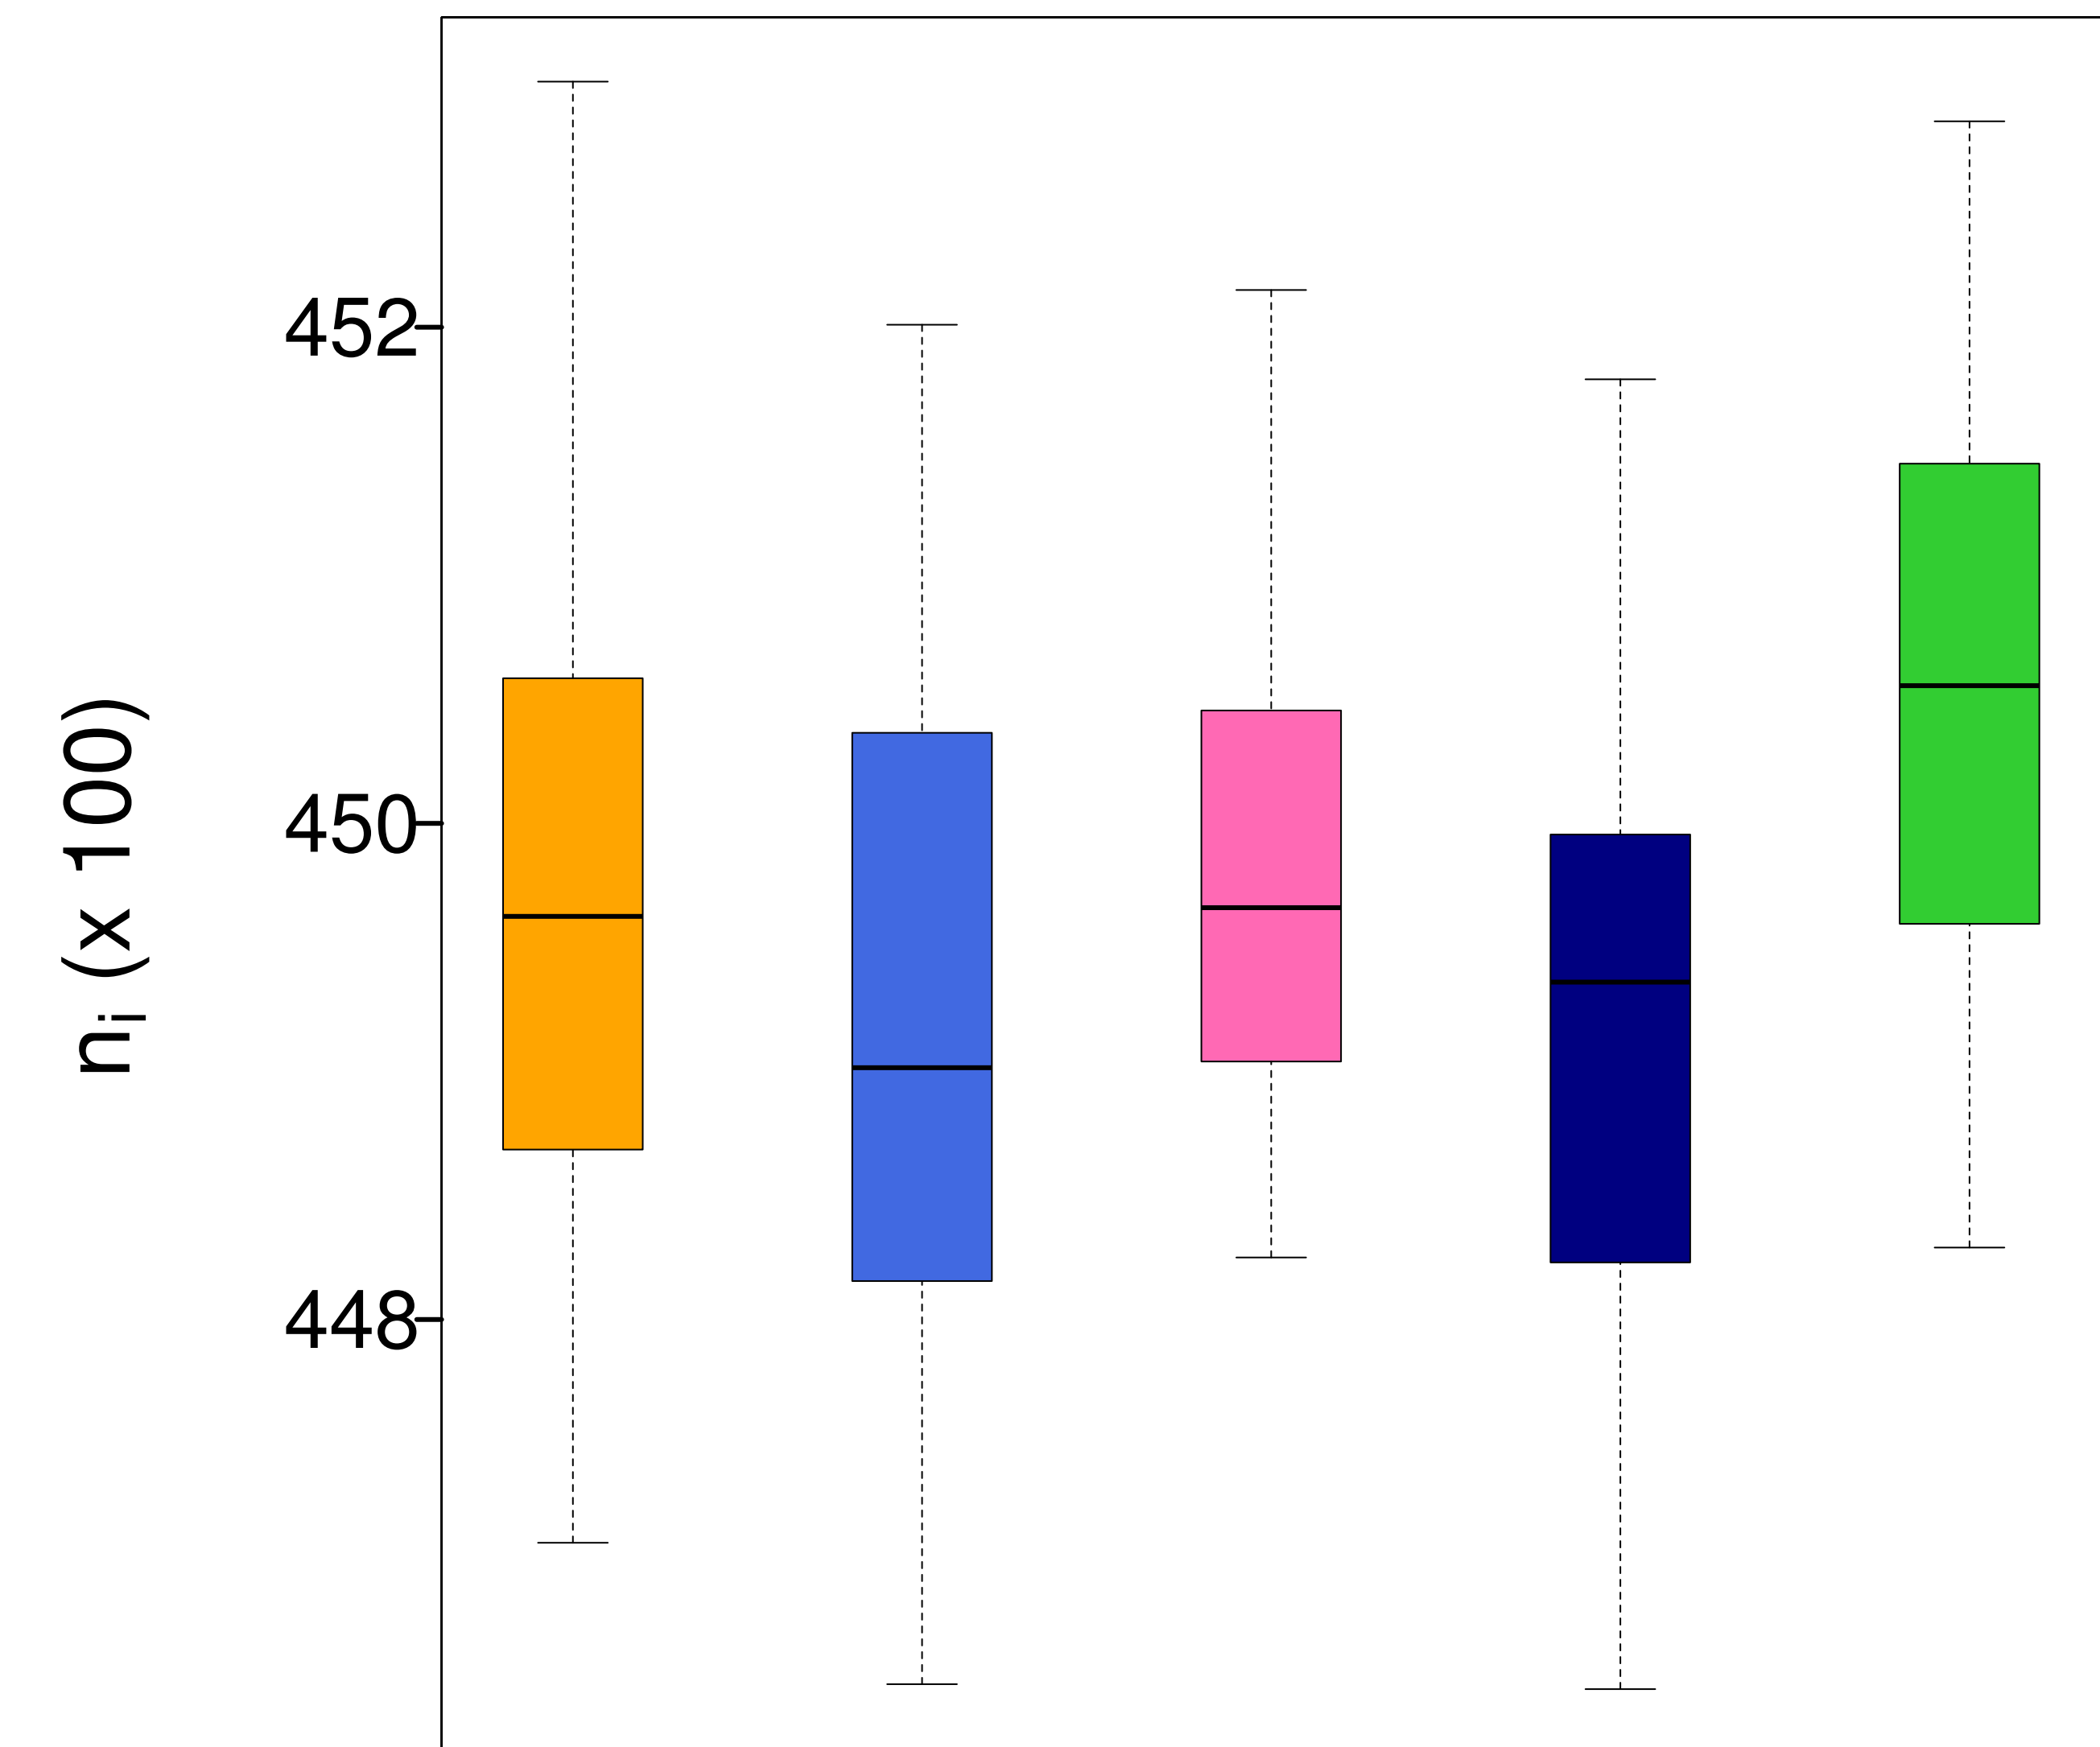

Supplement: supp [file elife-36317-supp-v2.zip]

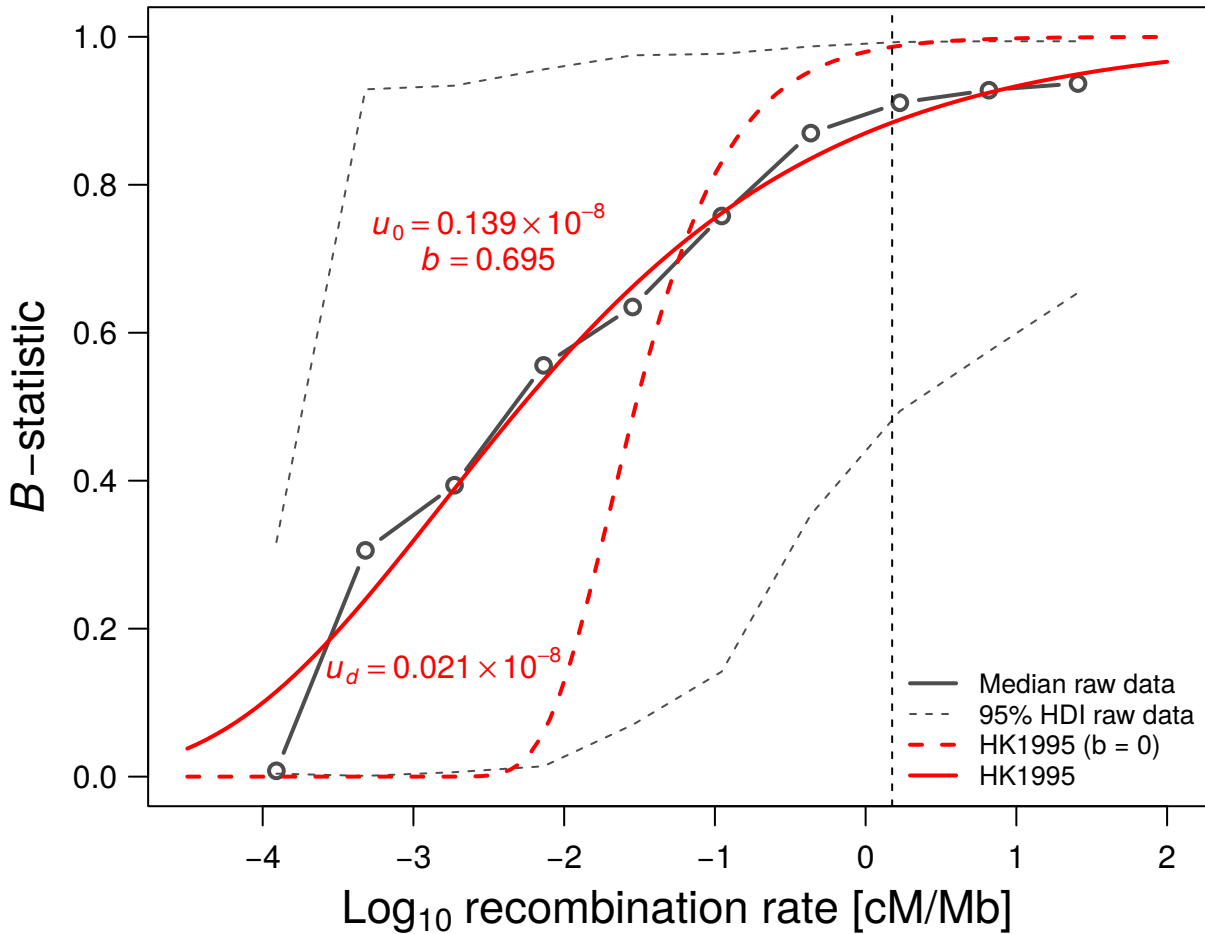

Supplement: supp [file elife-36317-supp-v2.zip]

Yoruba

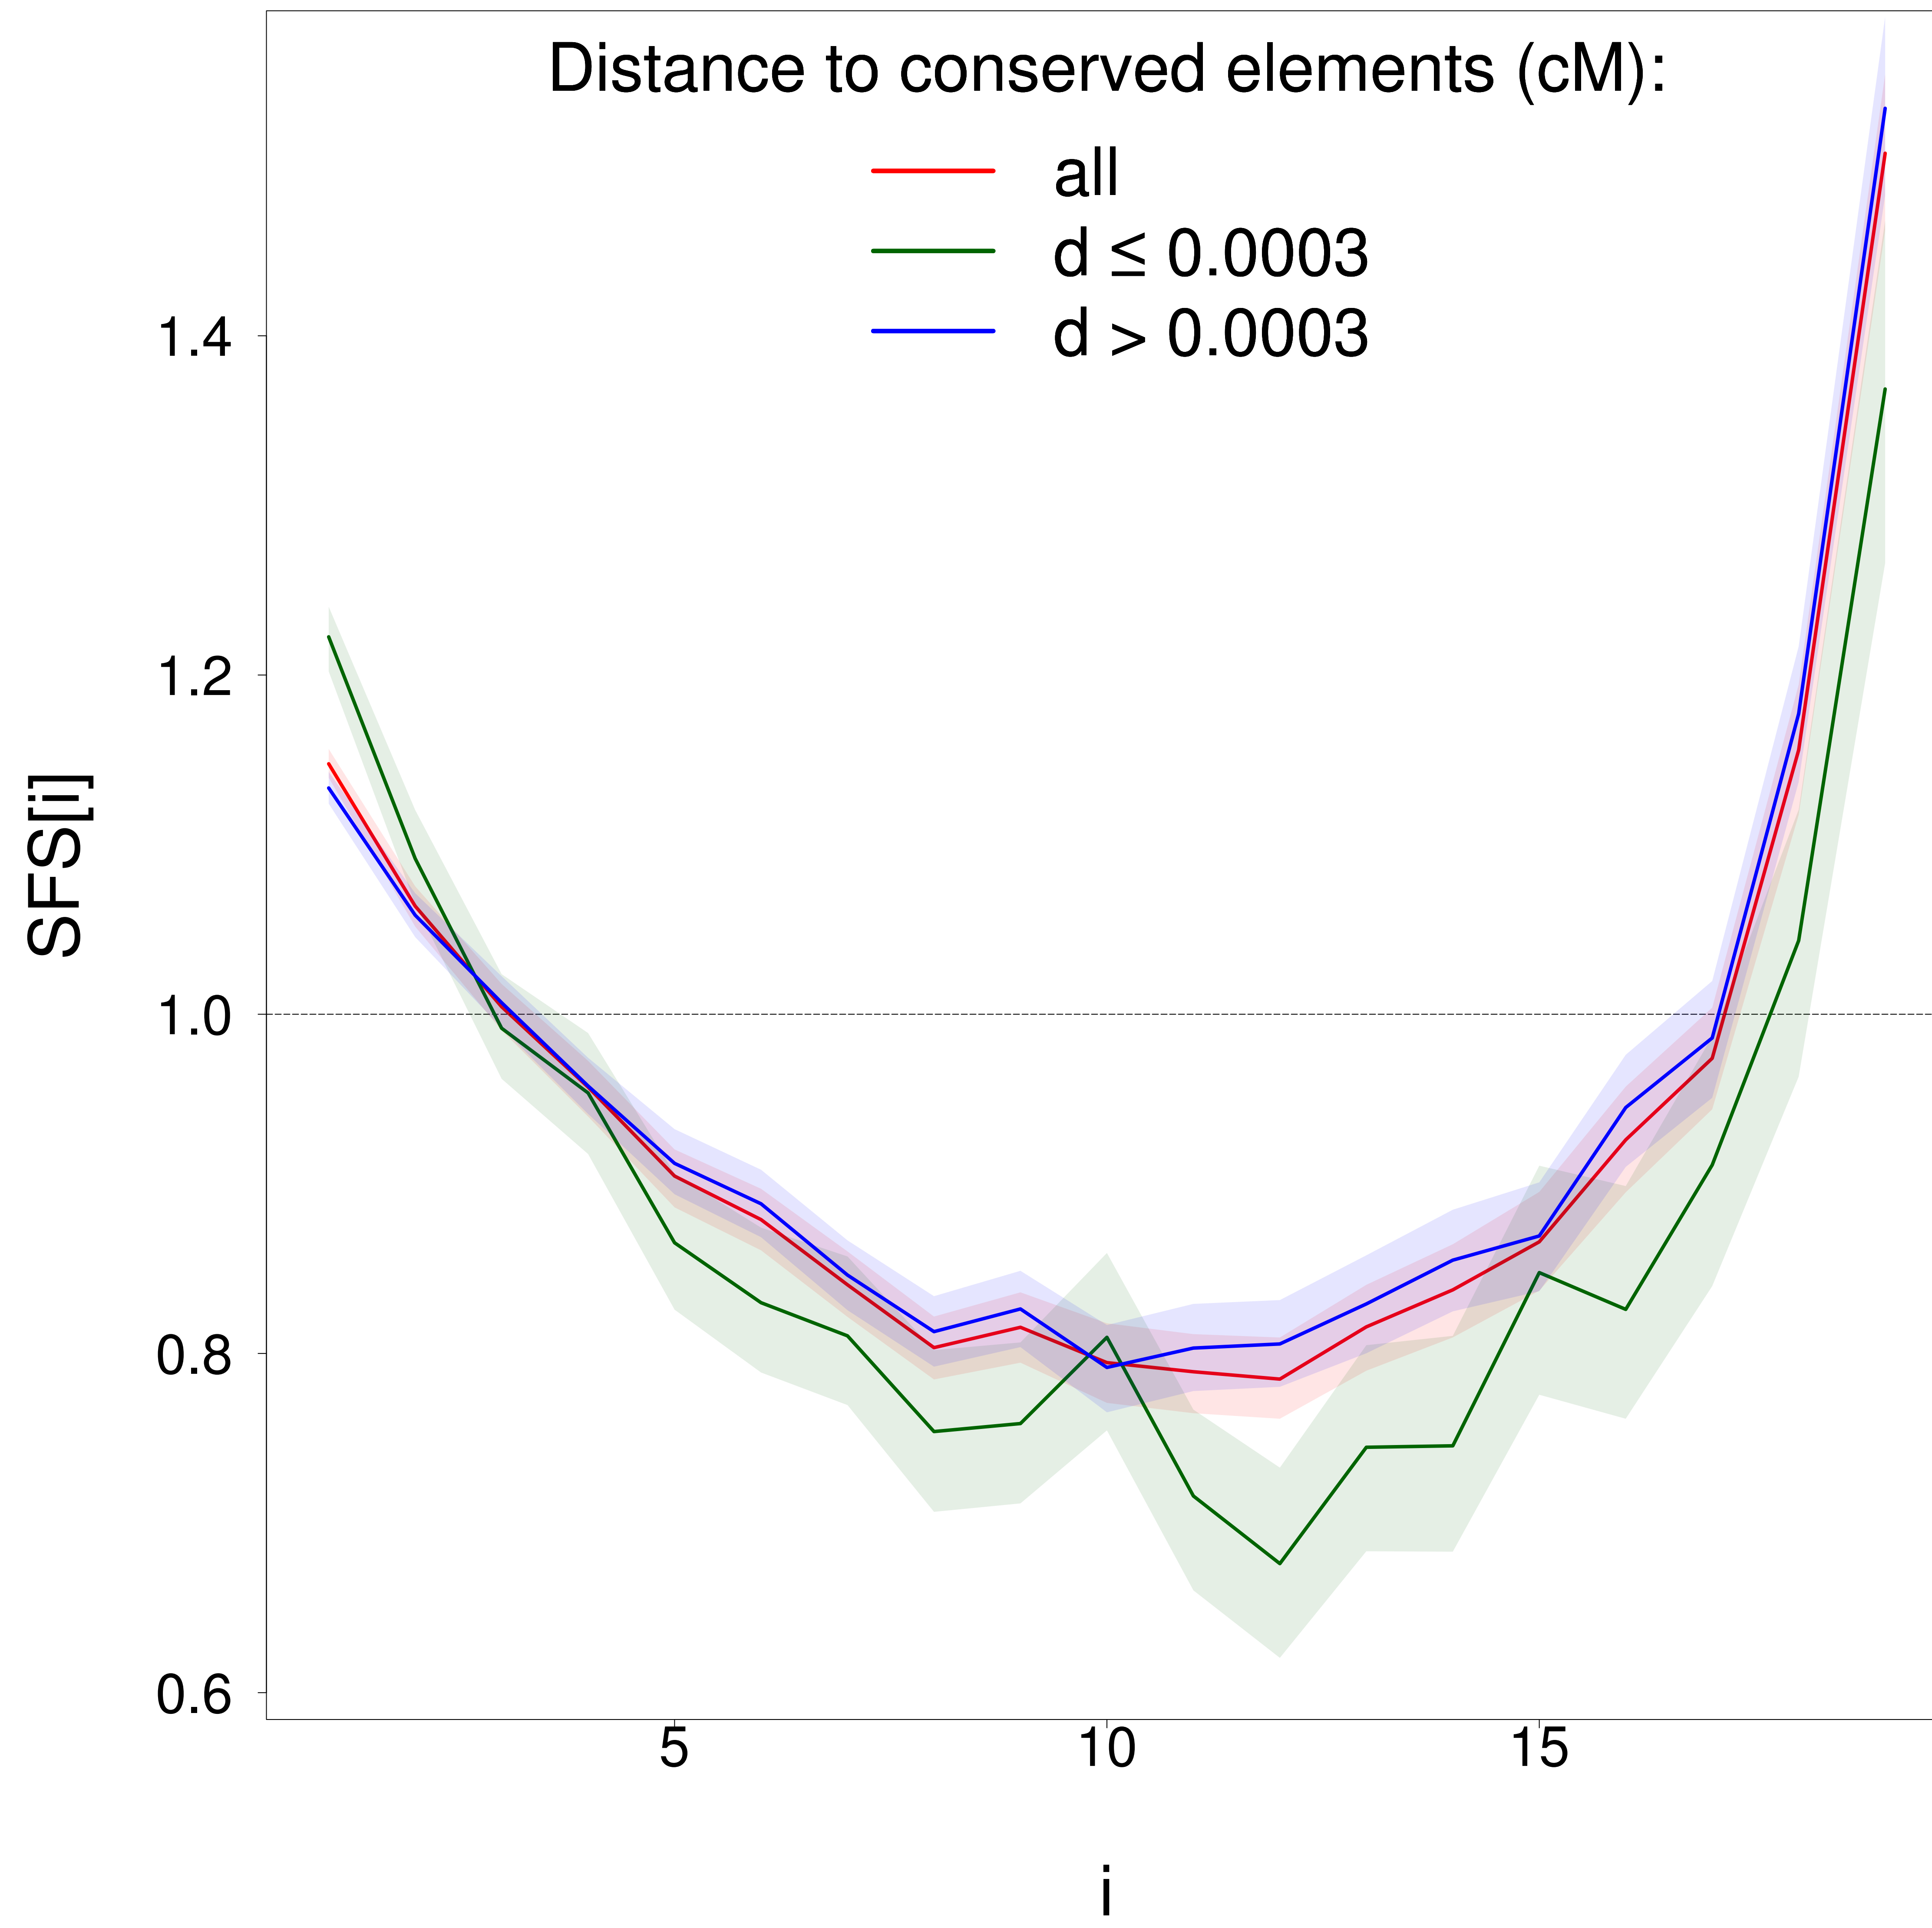

Japan

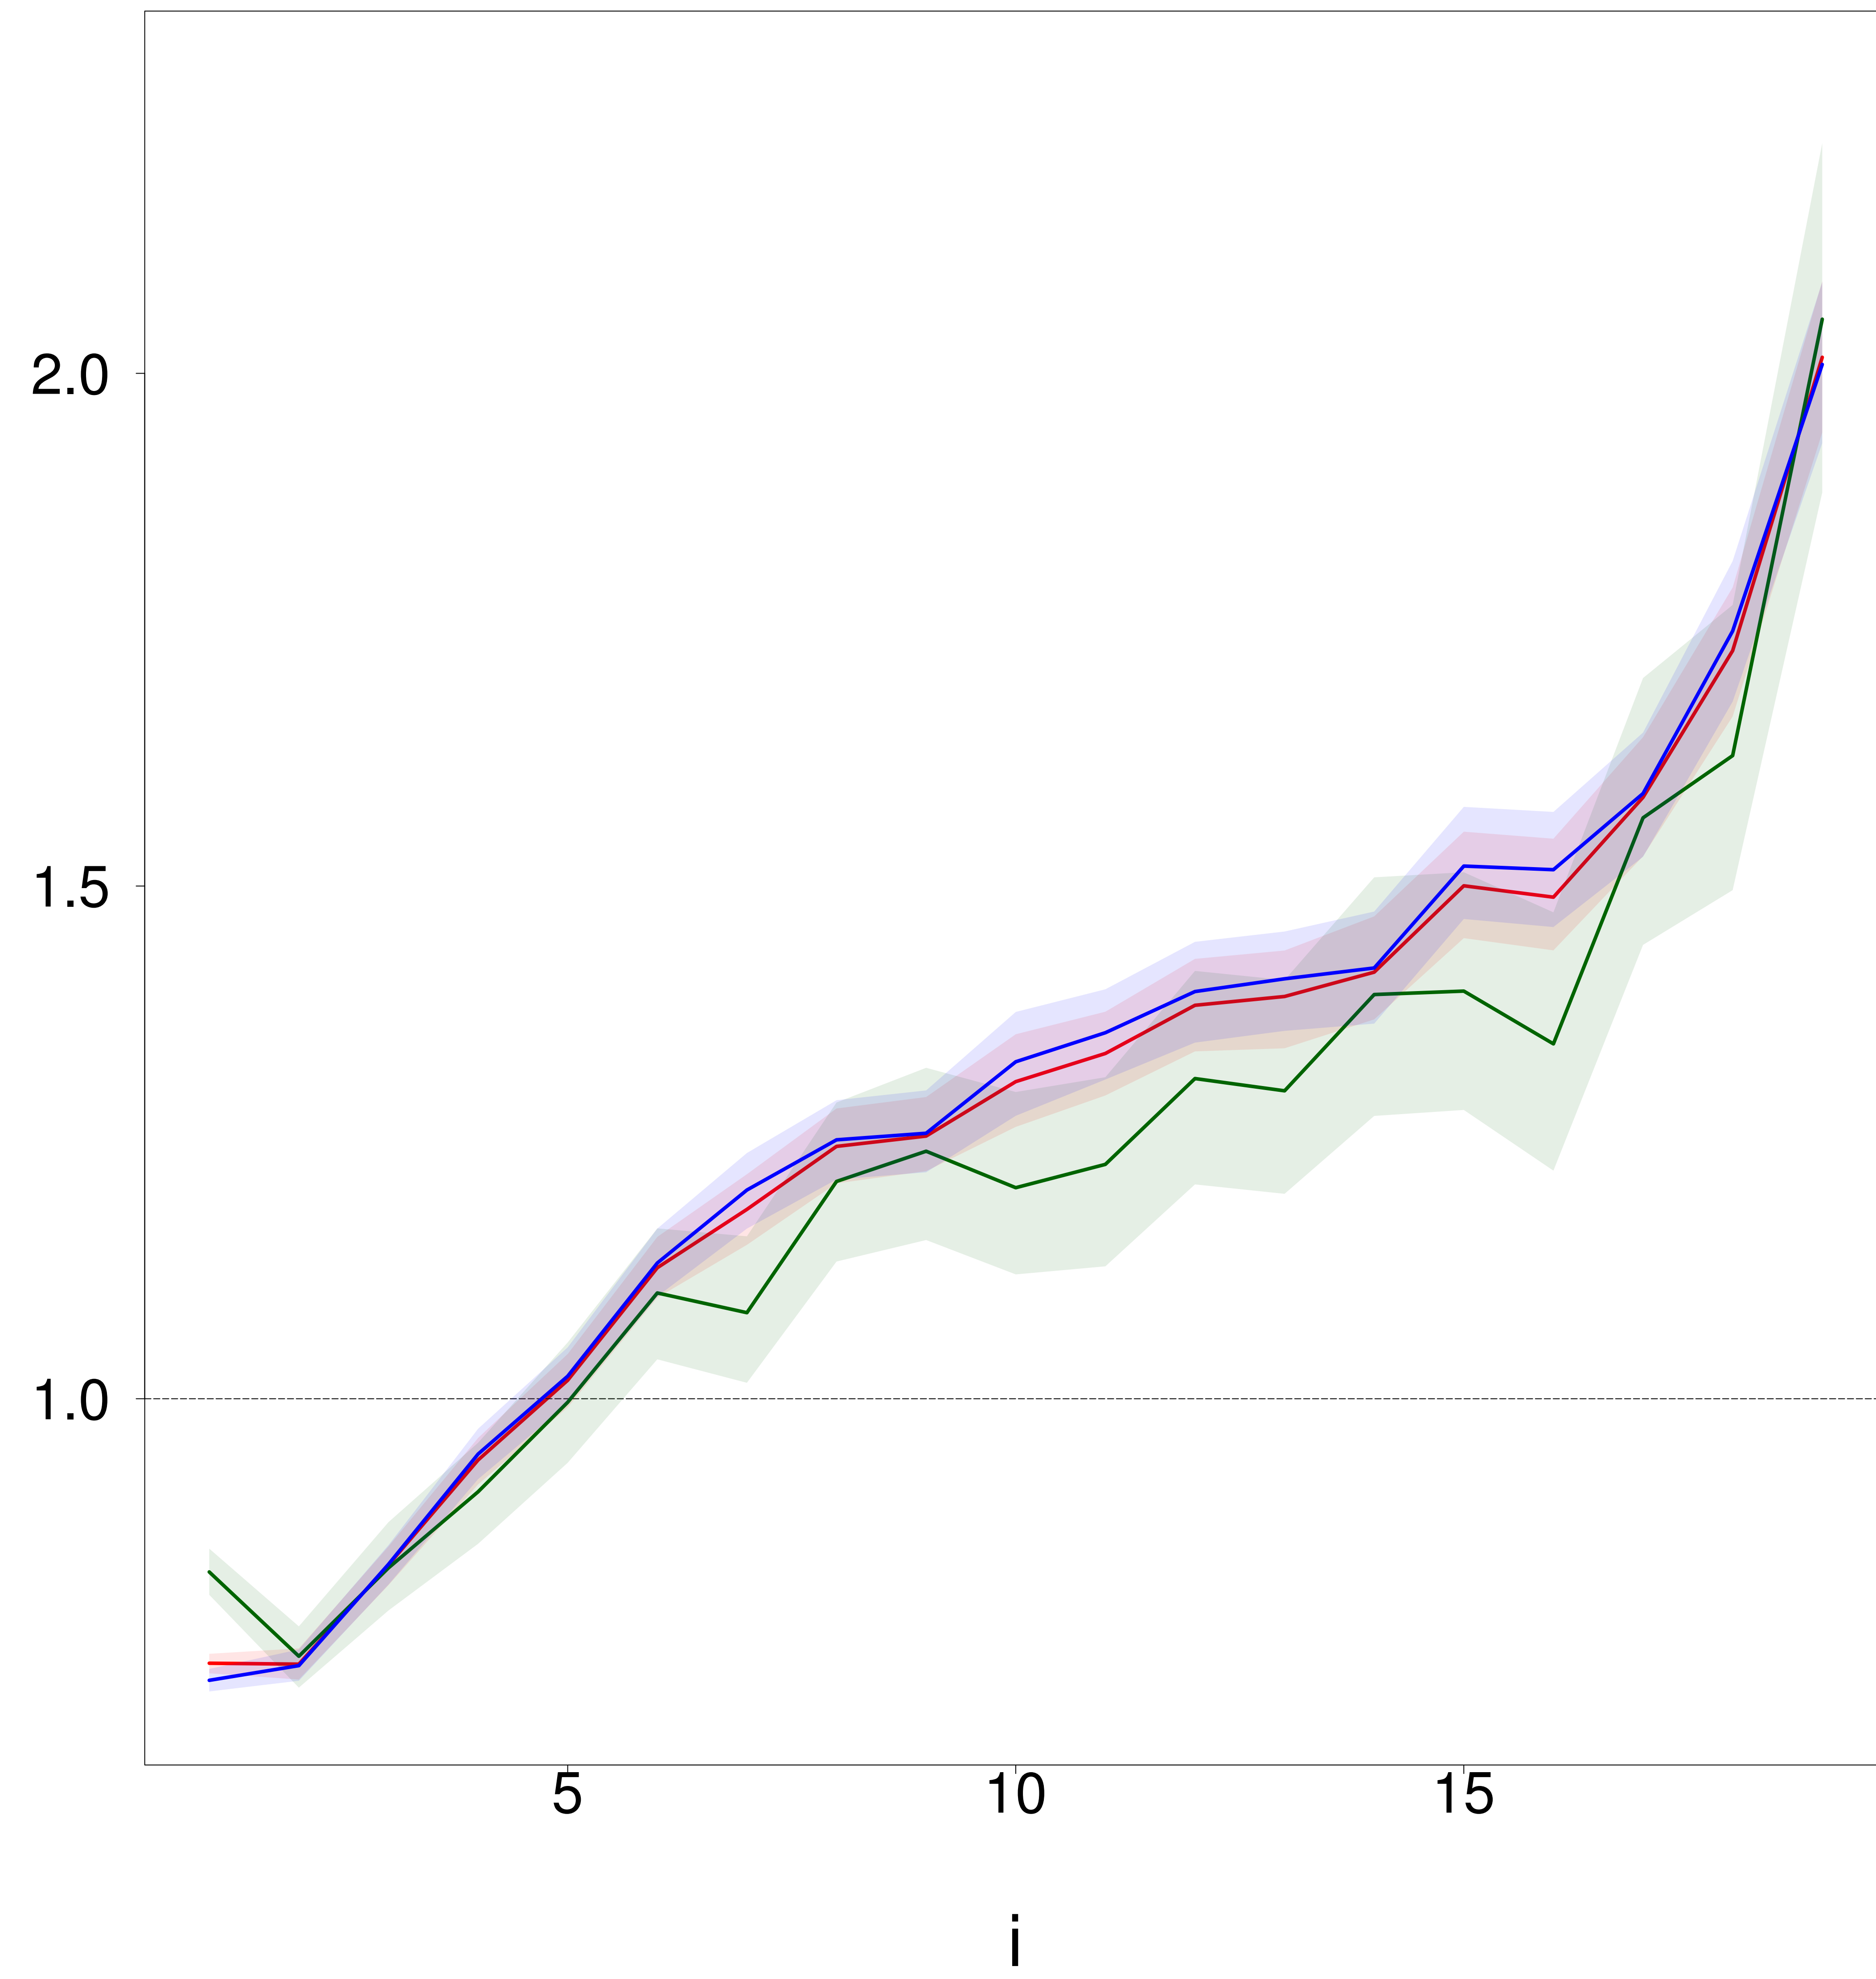

Supplement: supp [file elife-36317-supp-v2.zip]

**A**

YRI

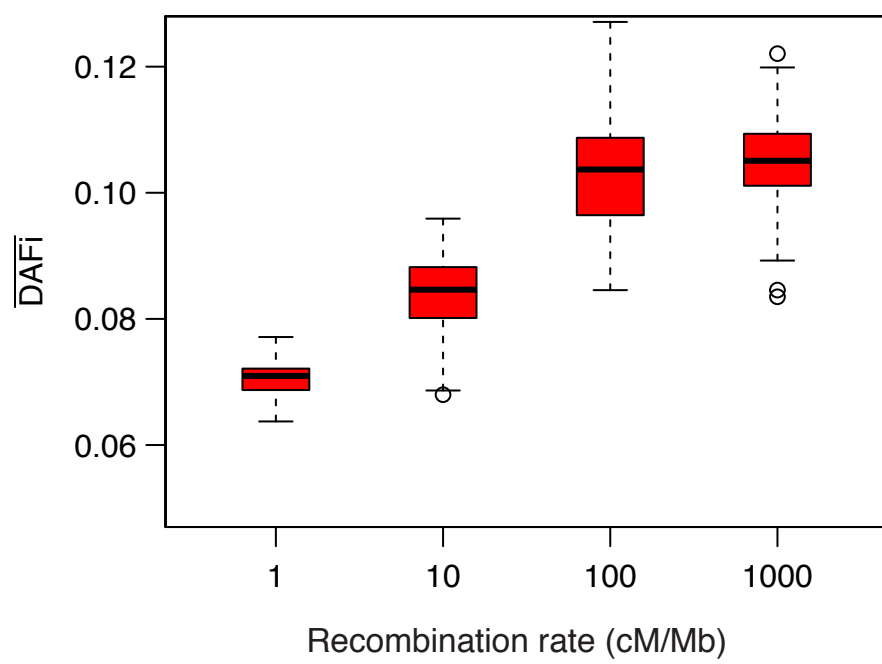**B**

JPT

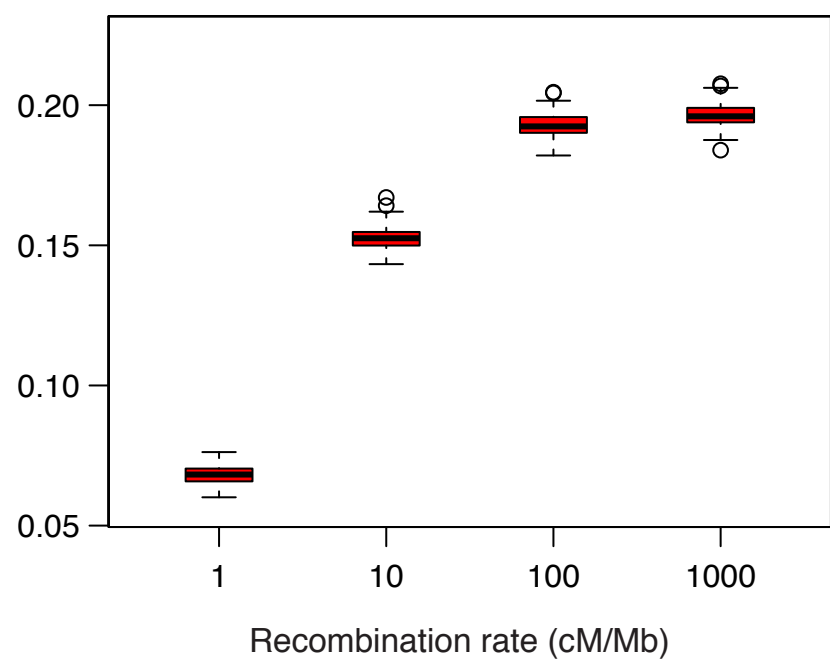**C**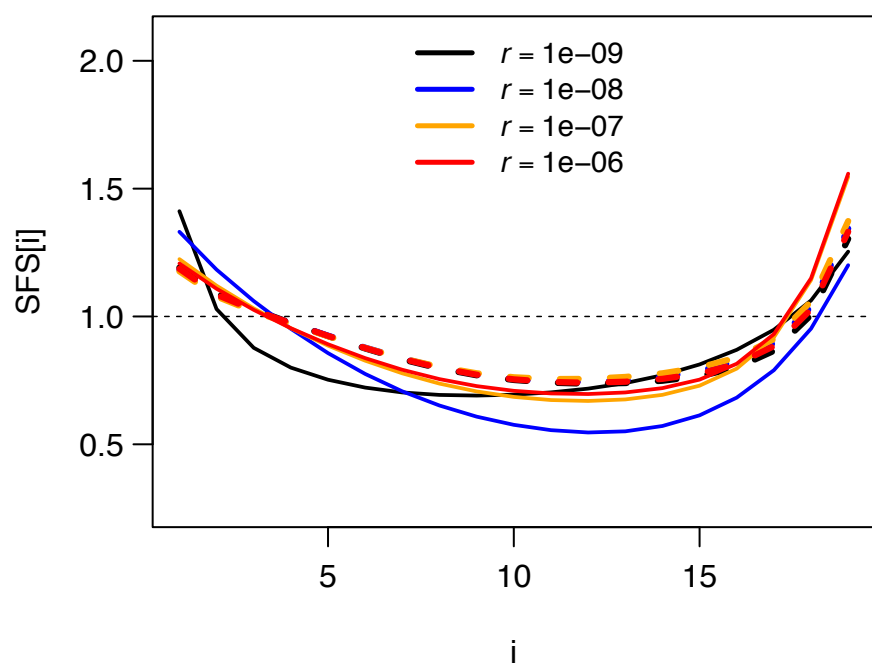**D**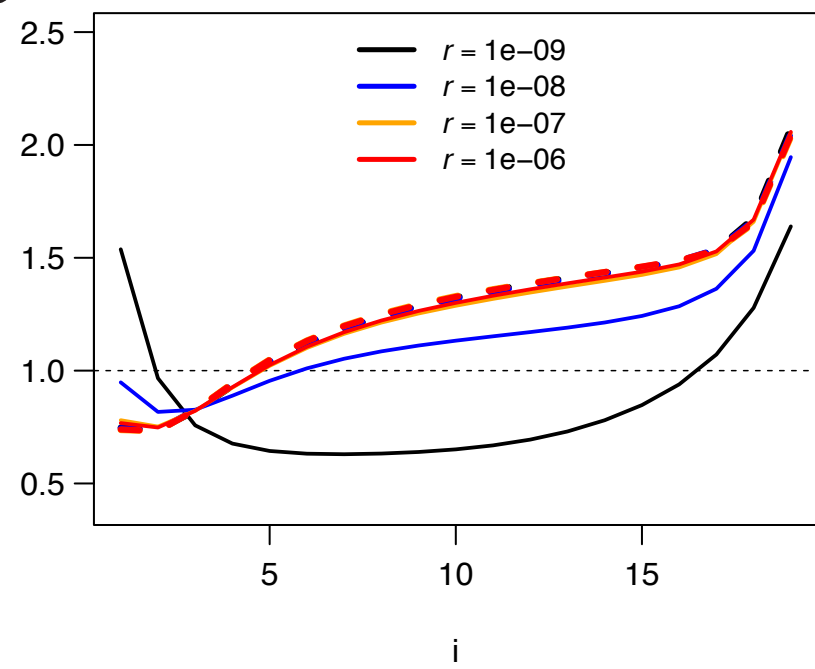**E**

Neutral

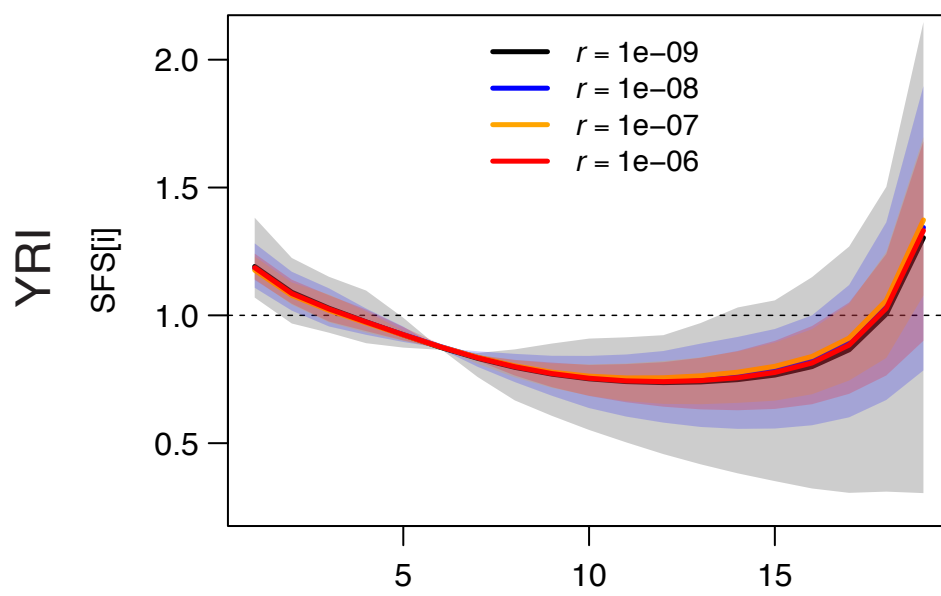**F**

Background selection

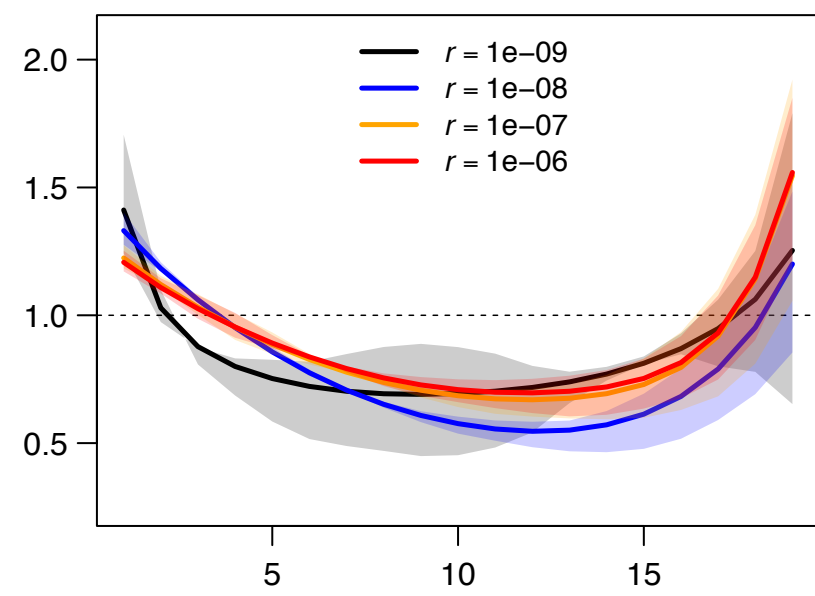**G**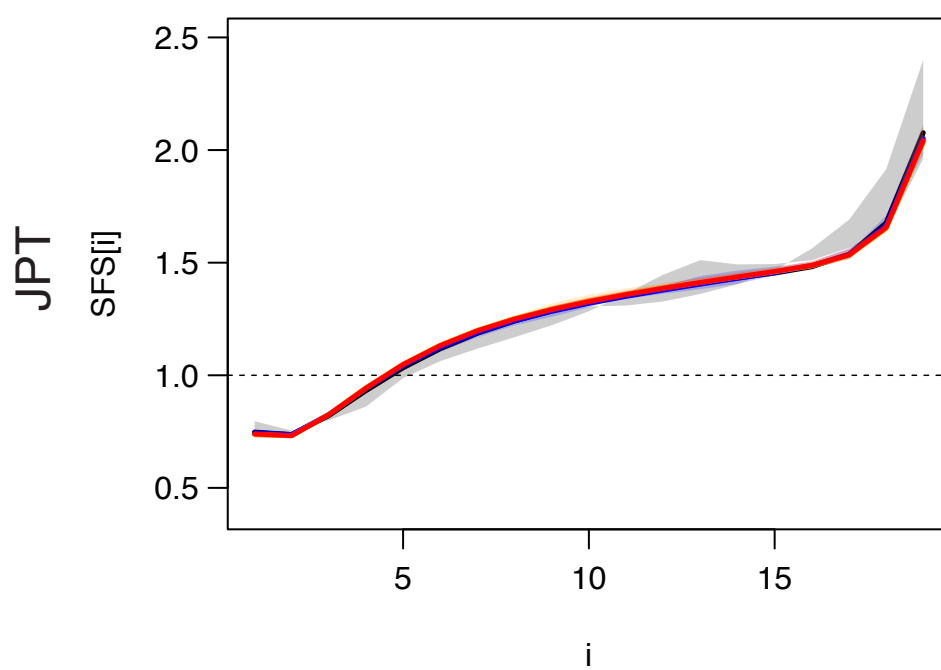**H**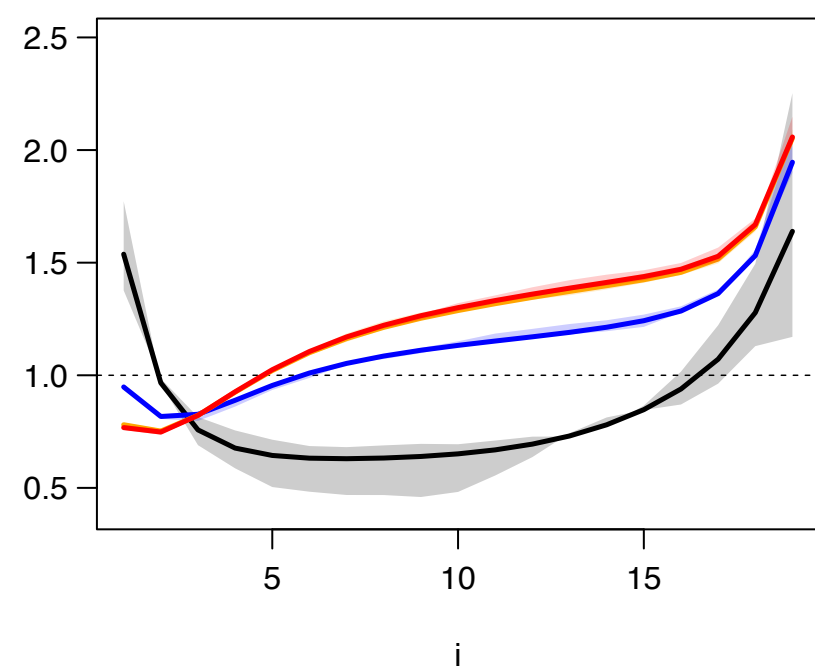

Supplement: supp [file elife-36317-supp-v2.zip]

**A****Yoruba**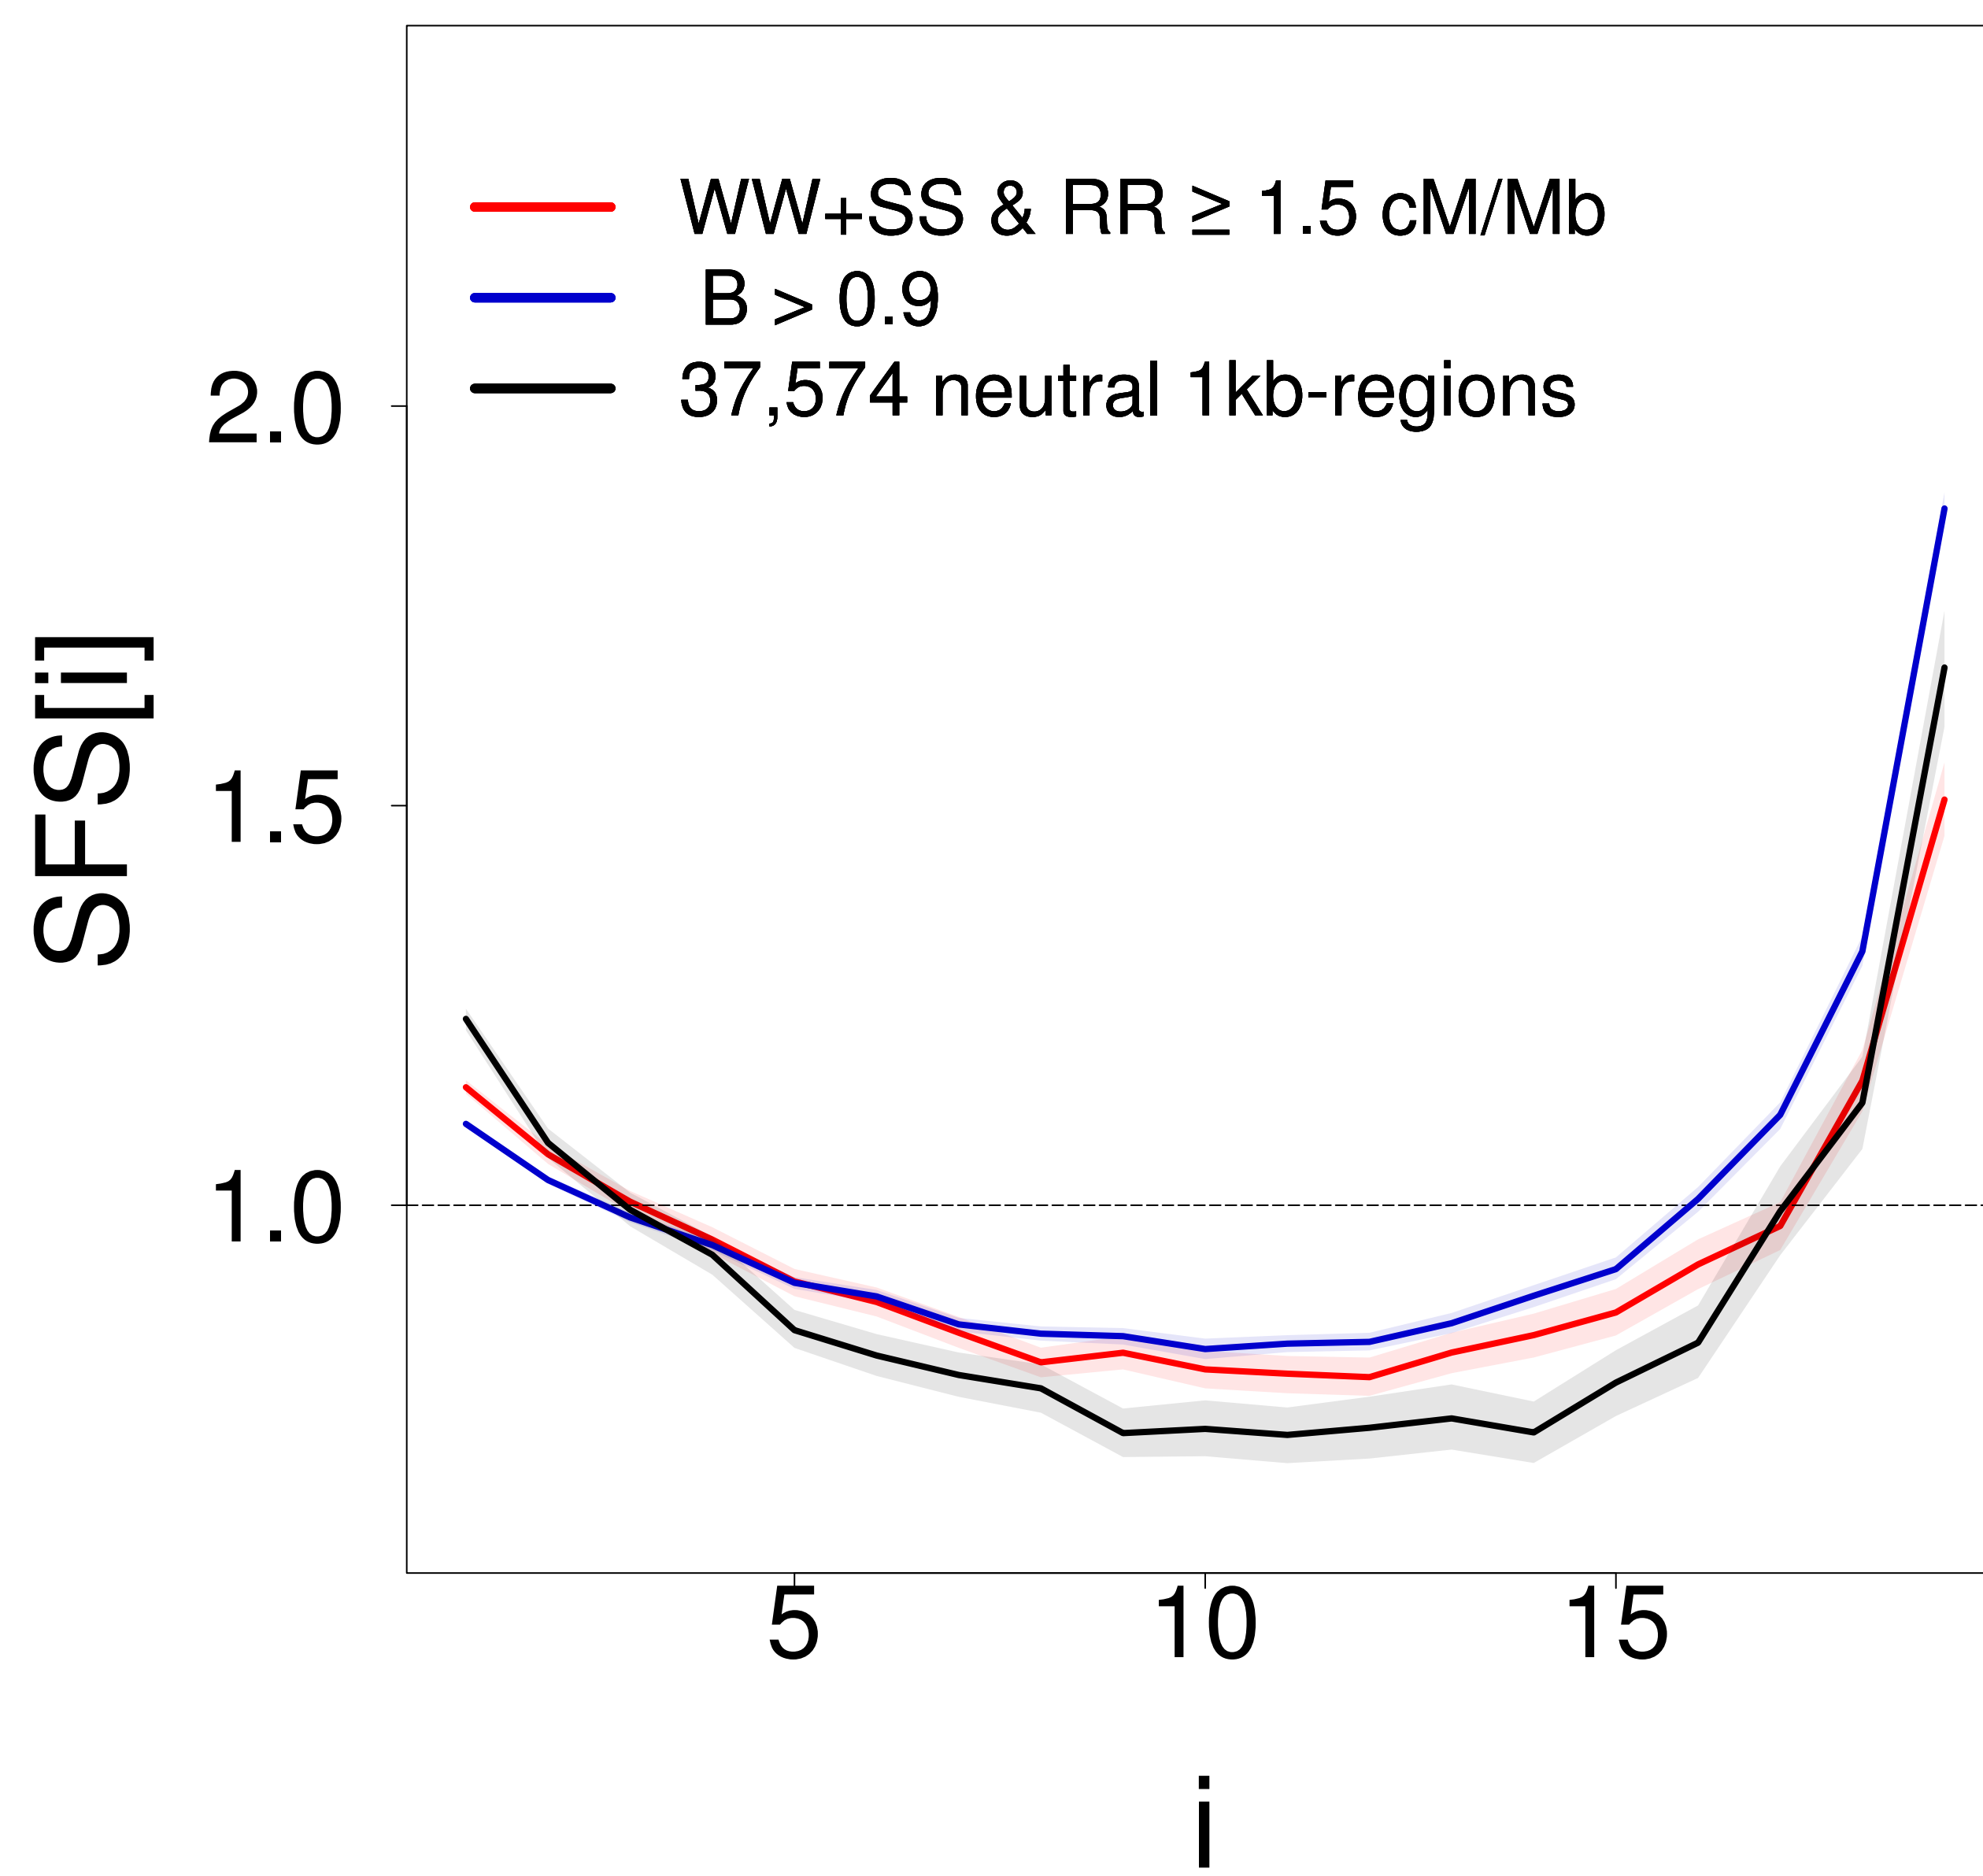**B****Yoruba**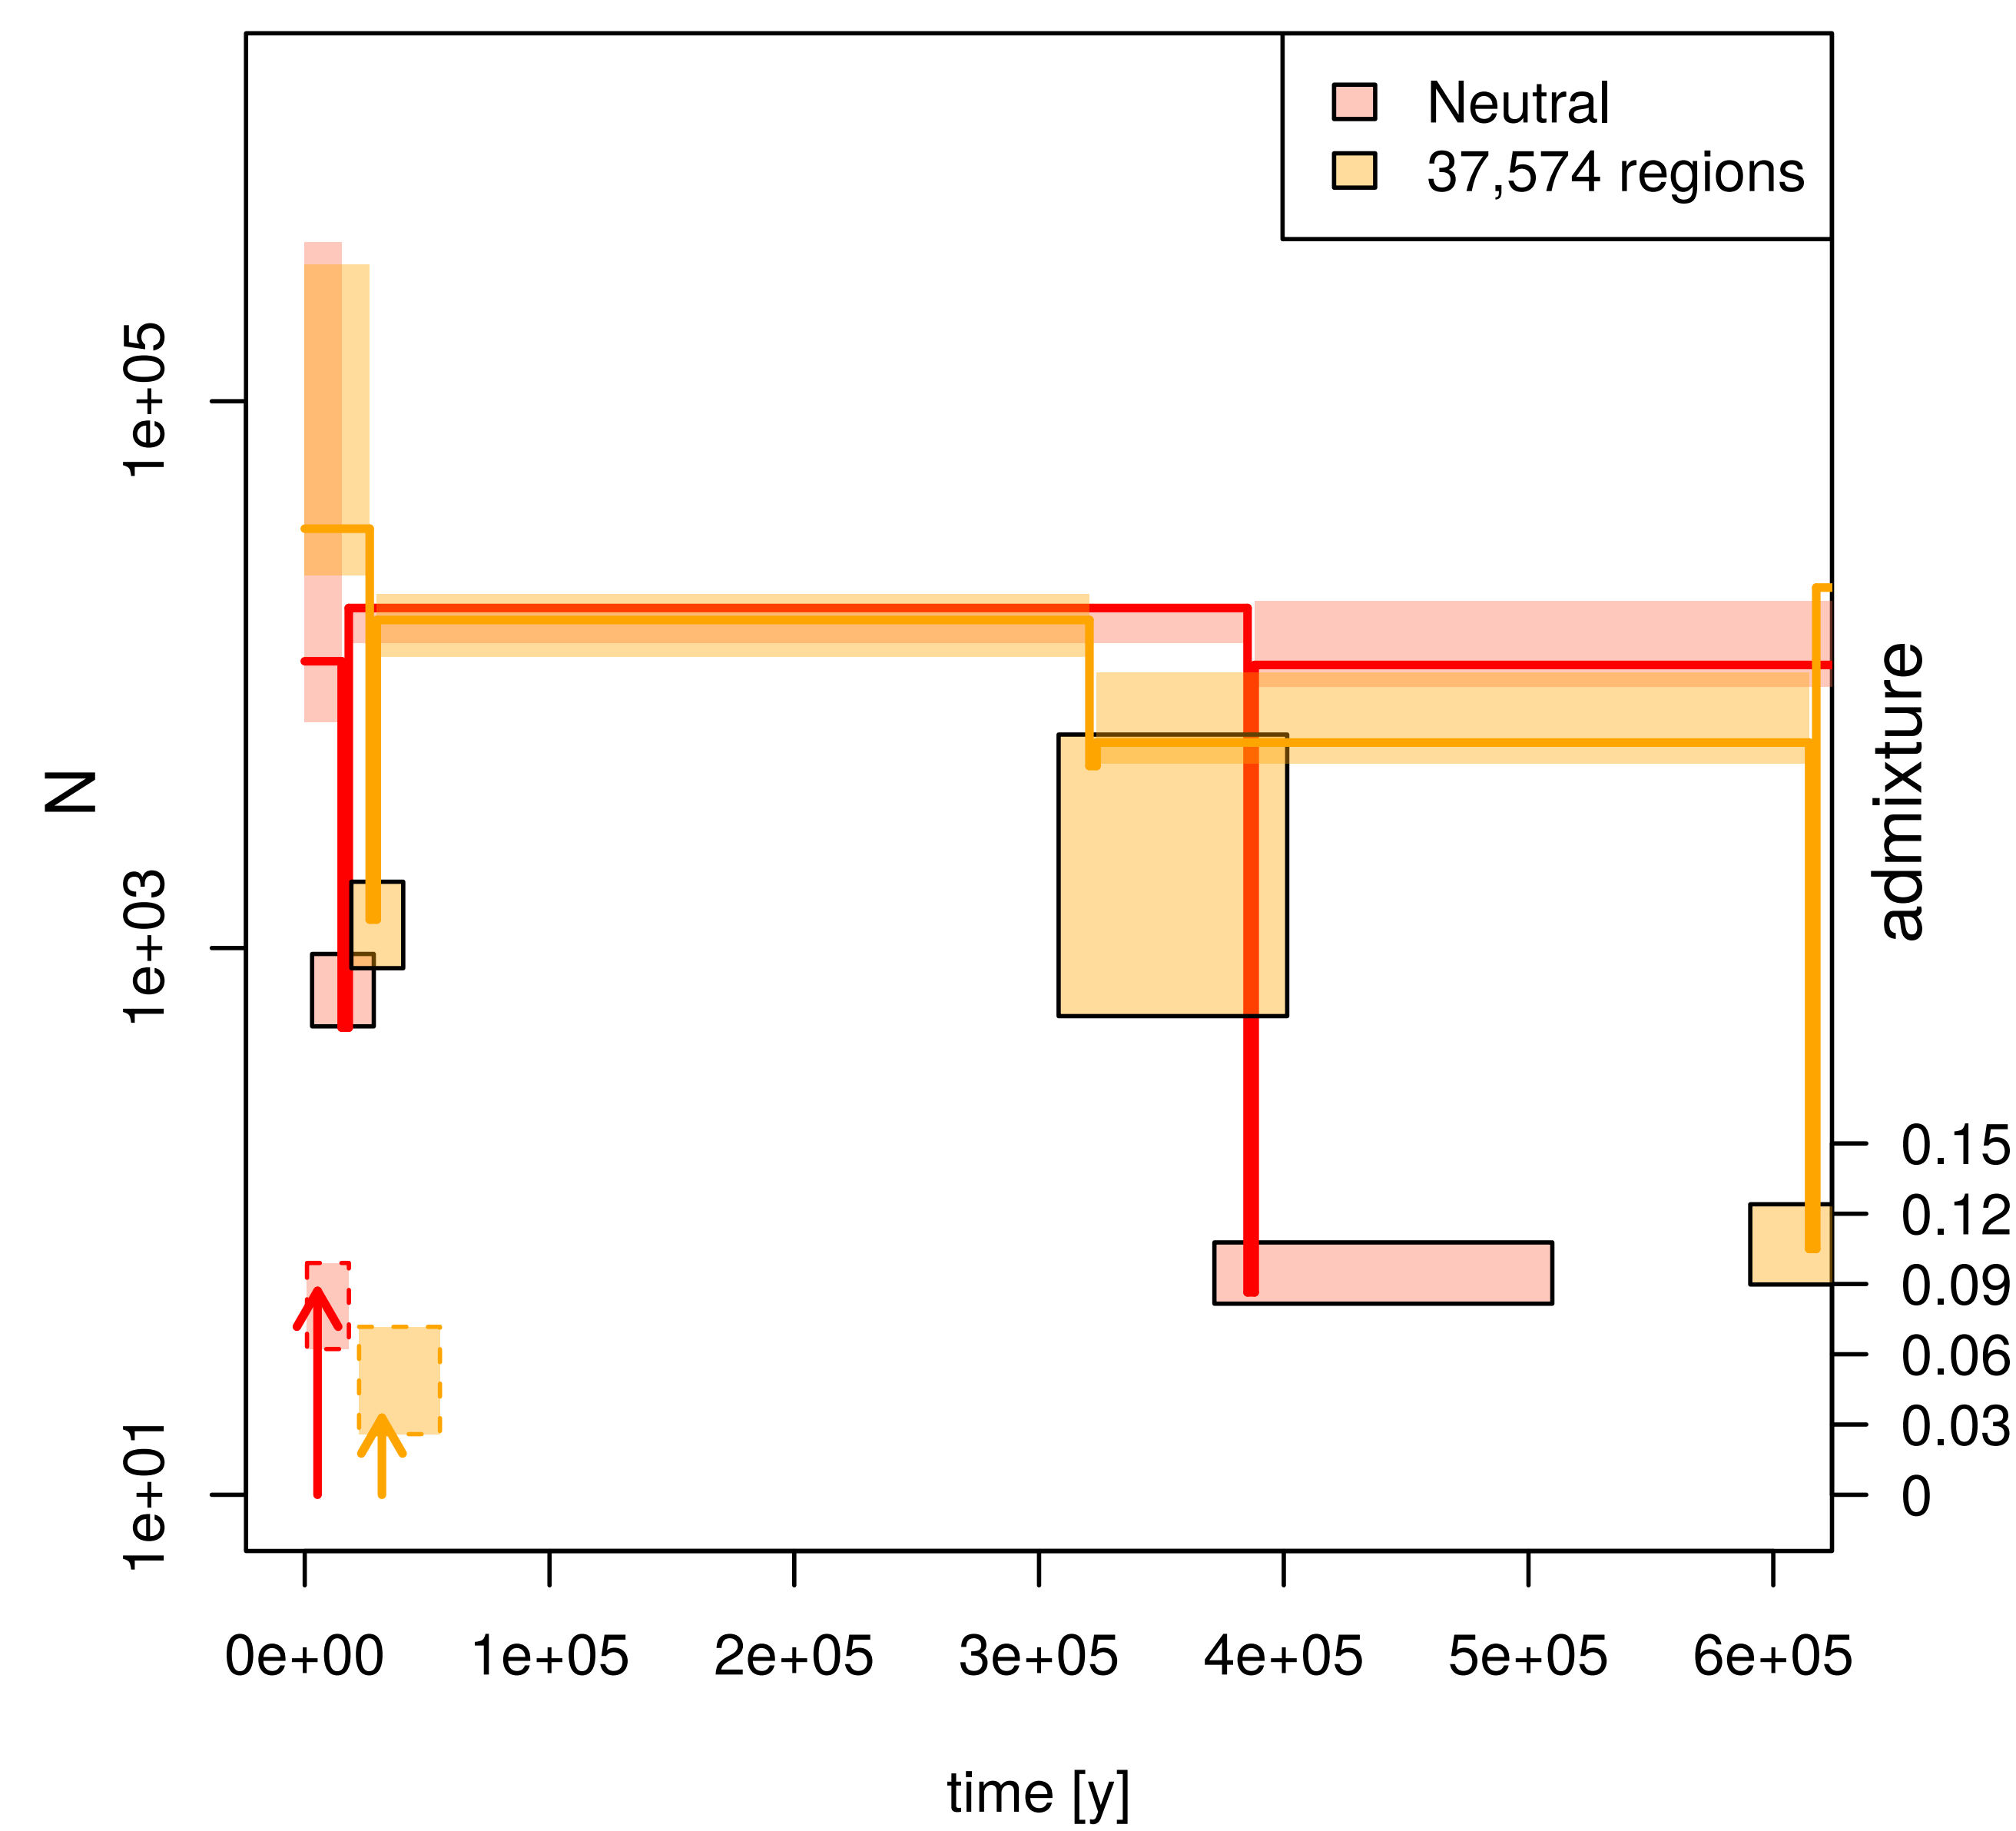**Yoruba**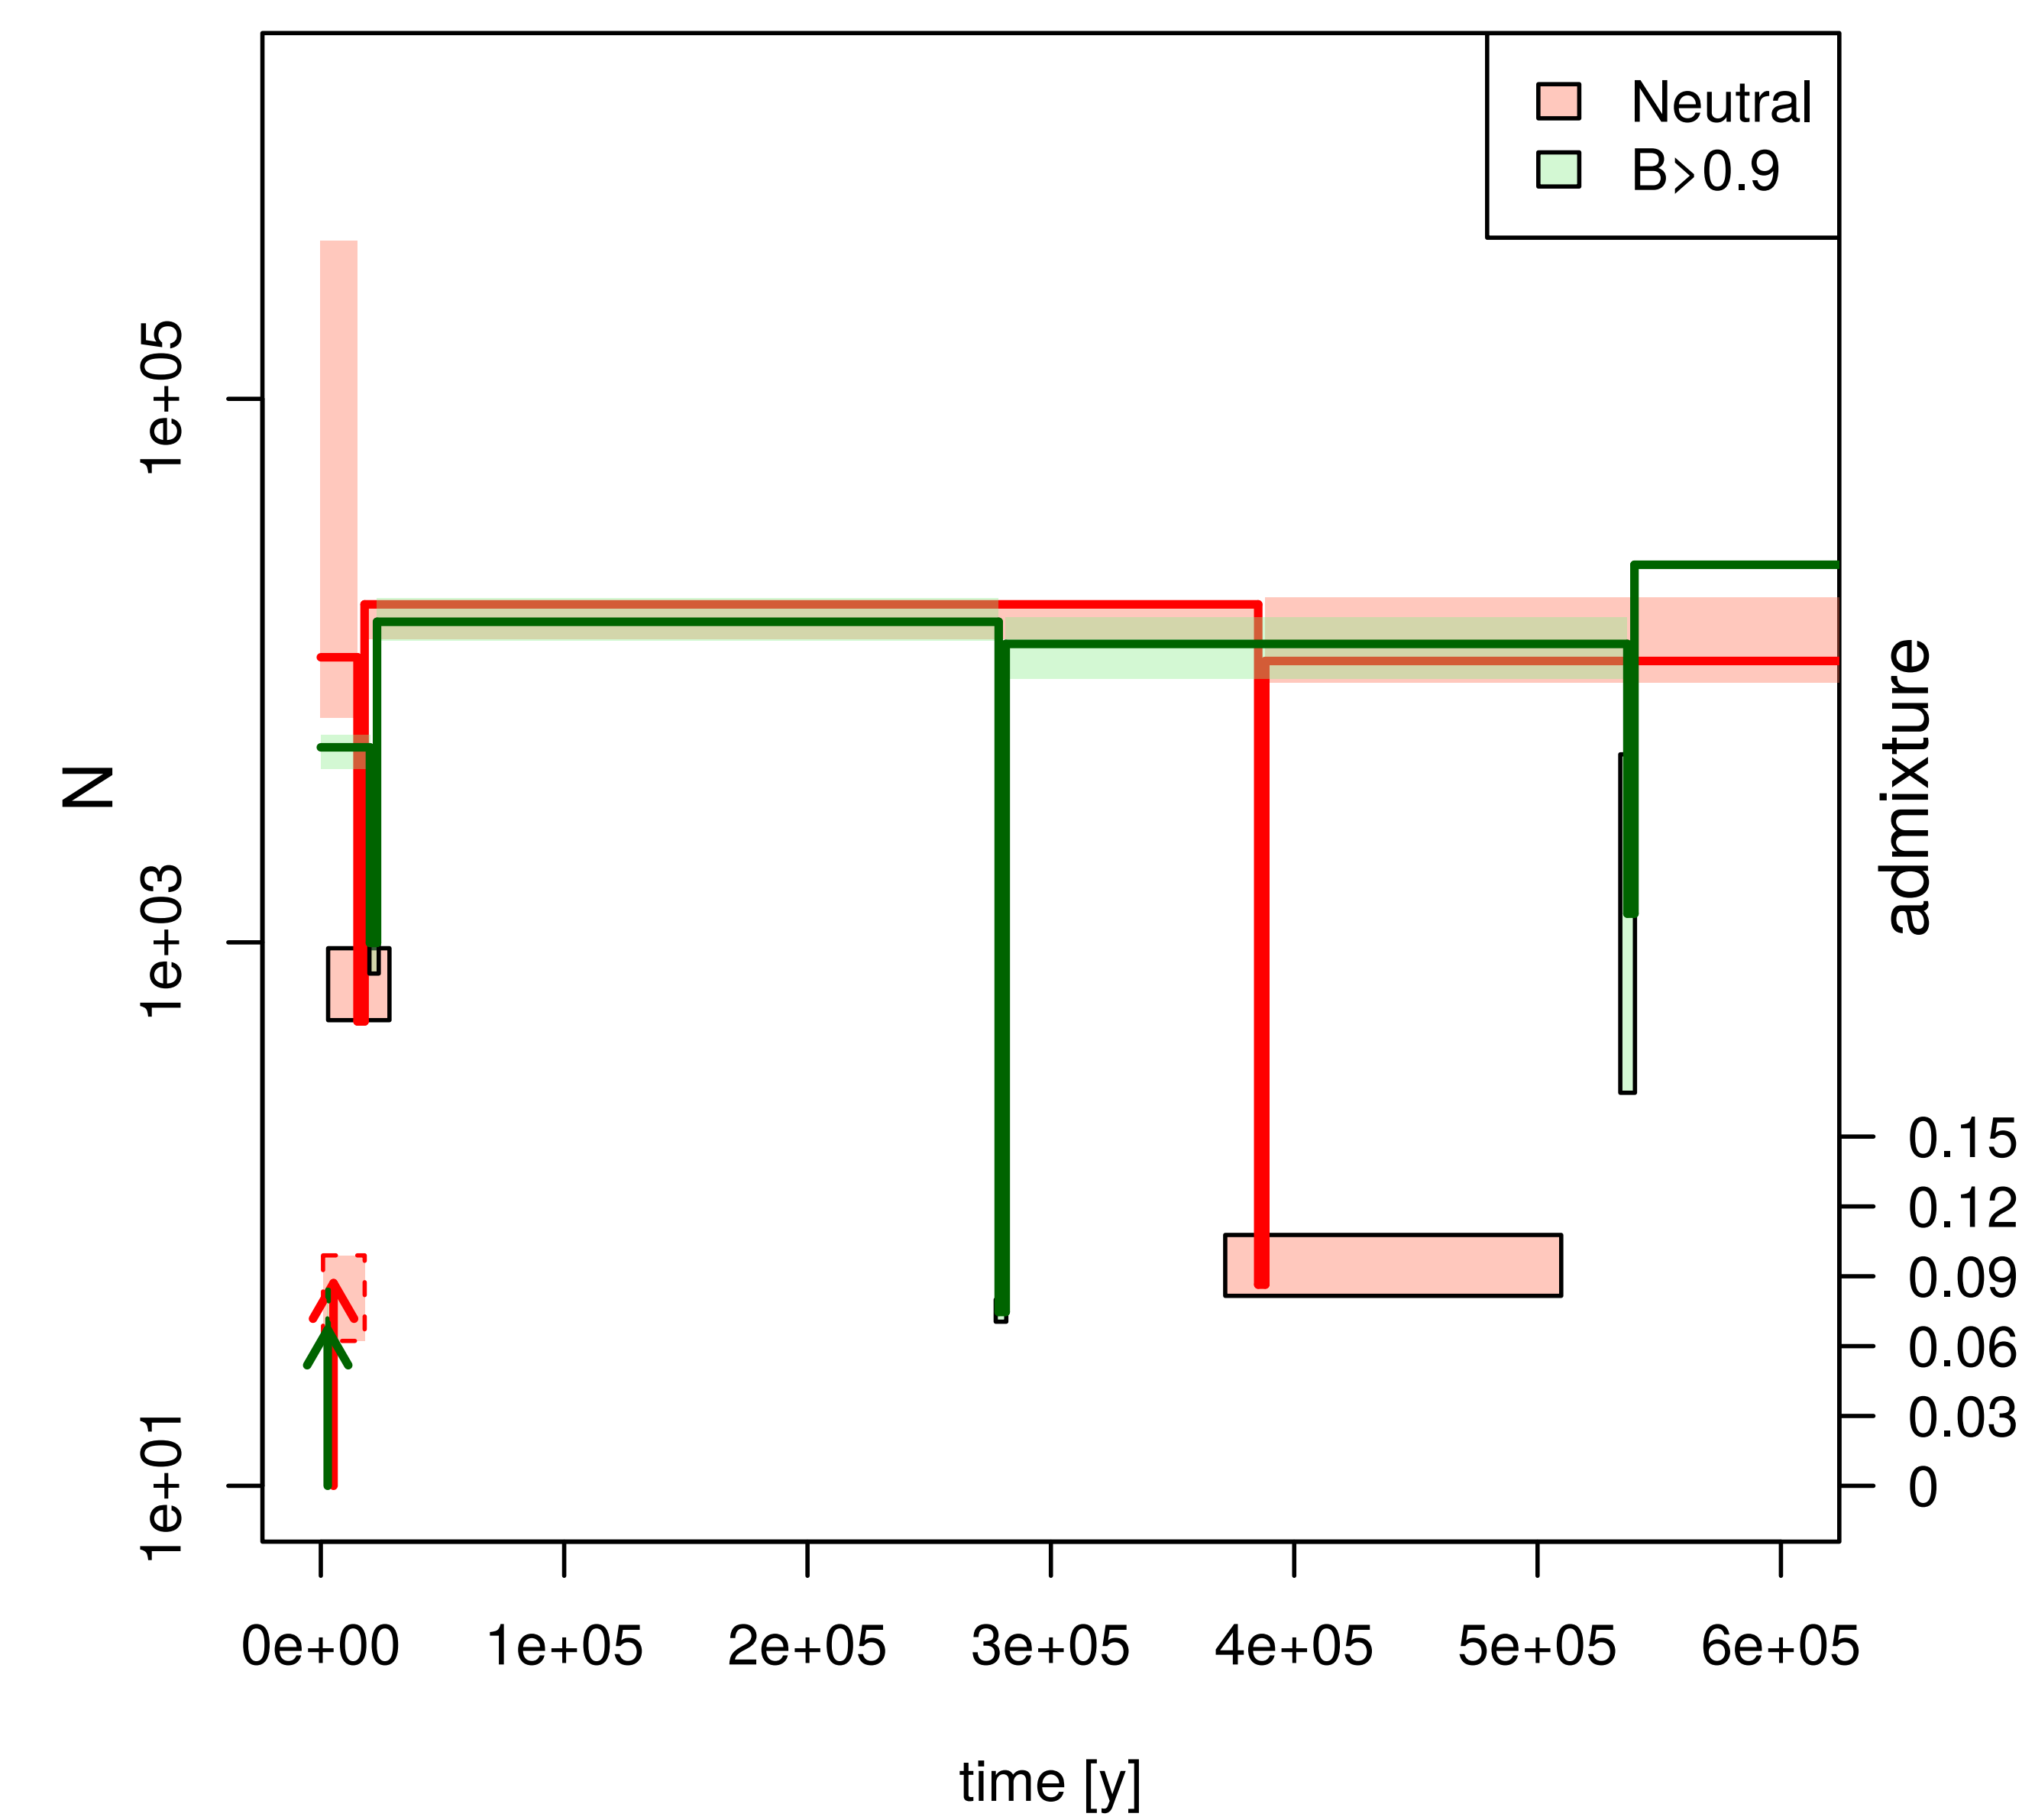**Japan**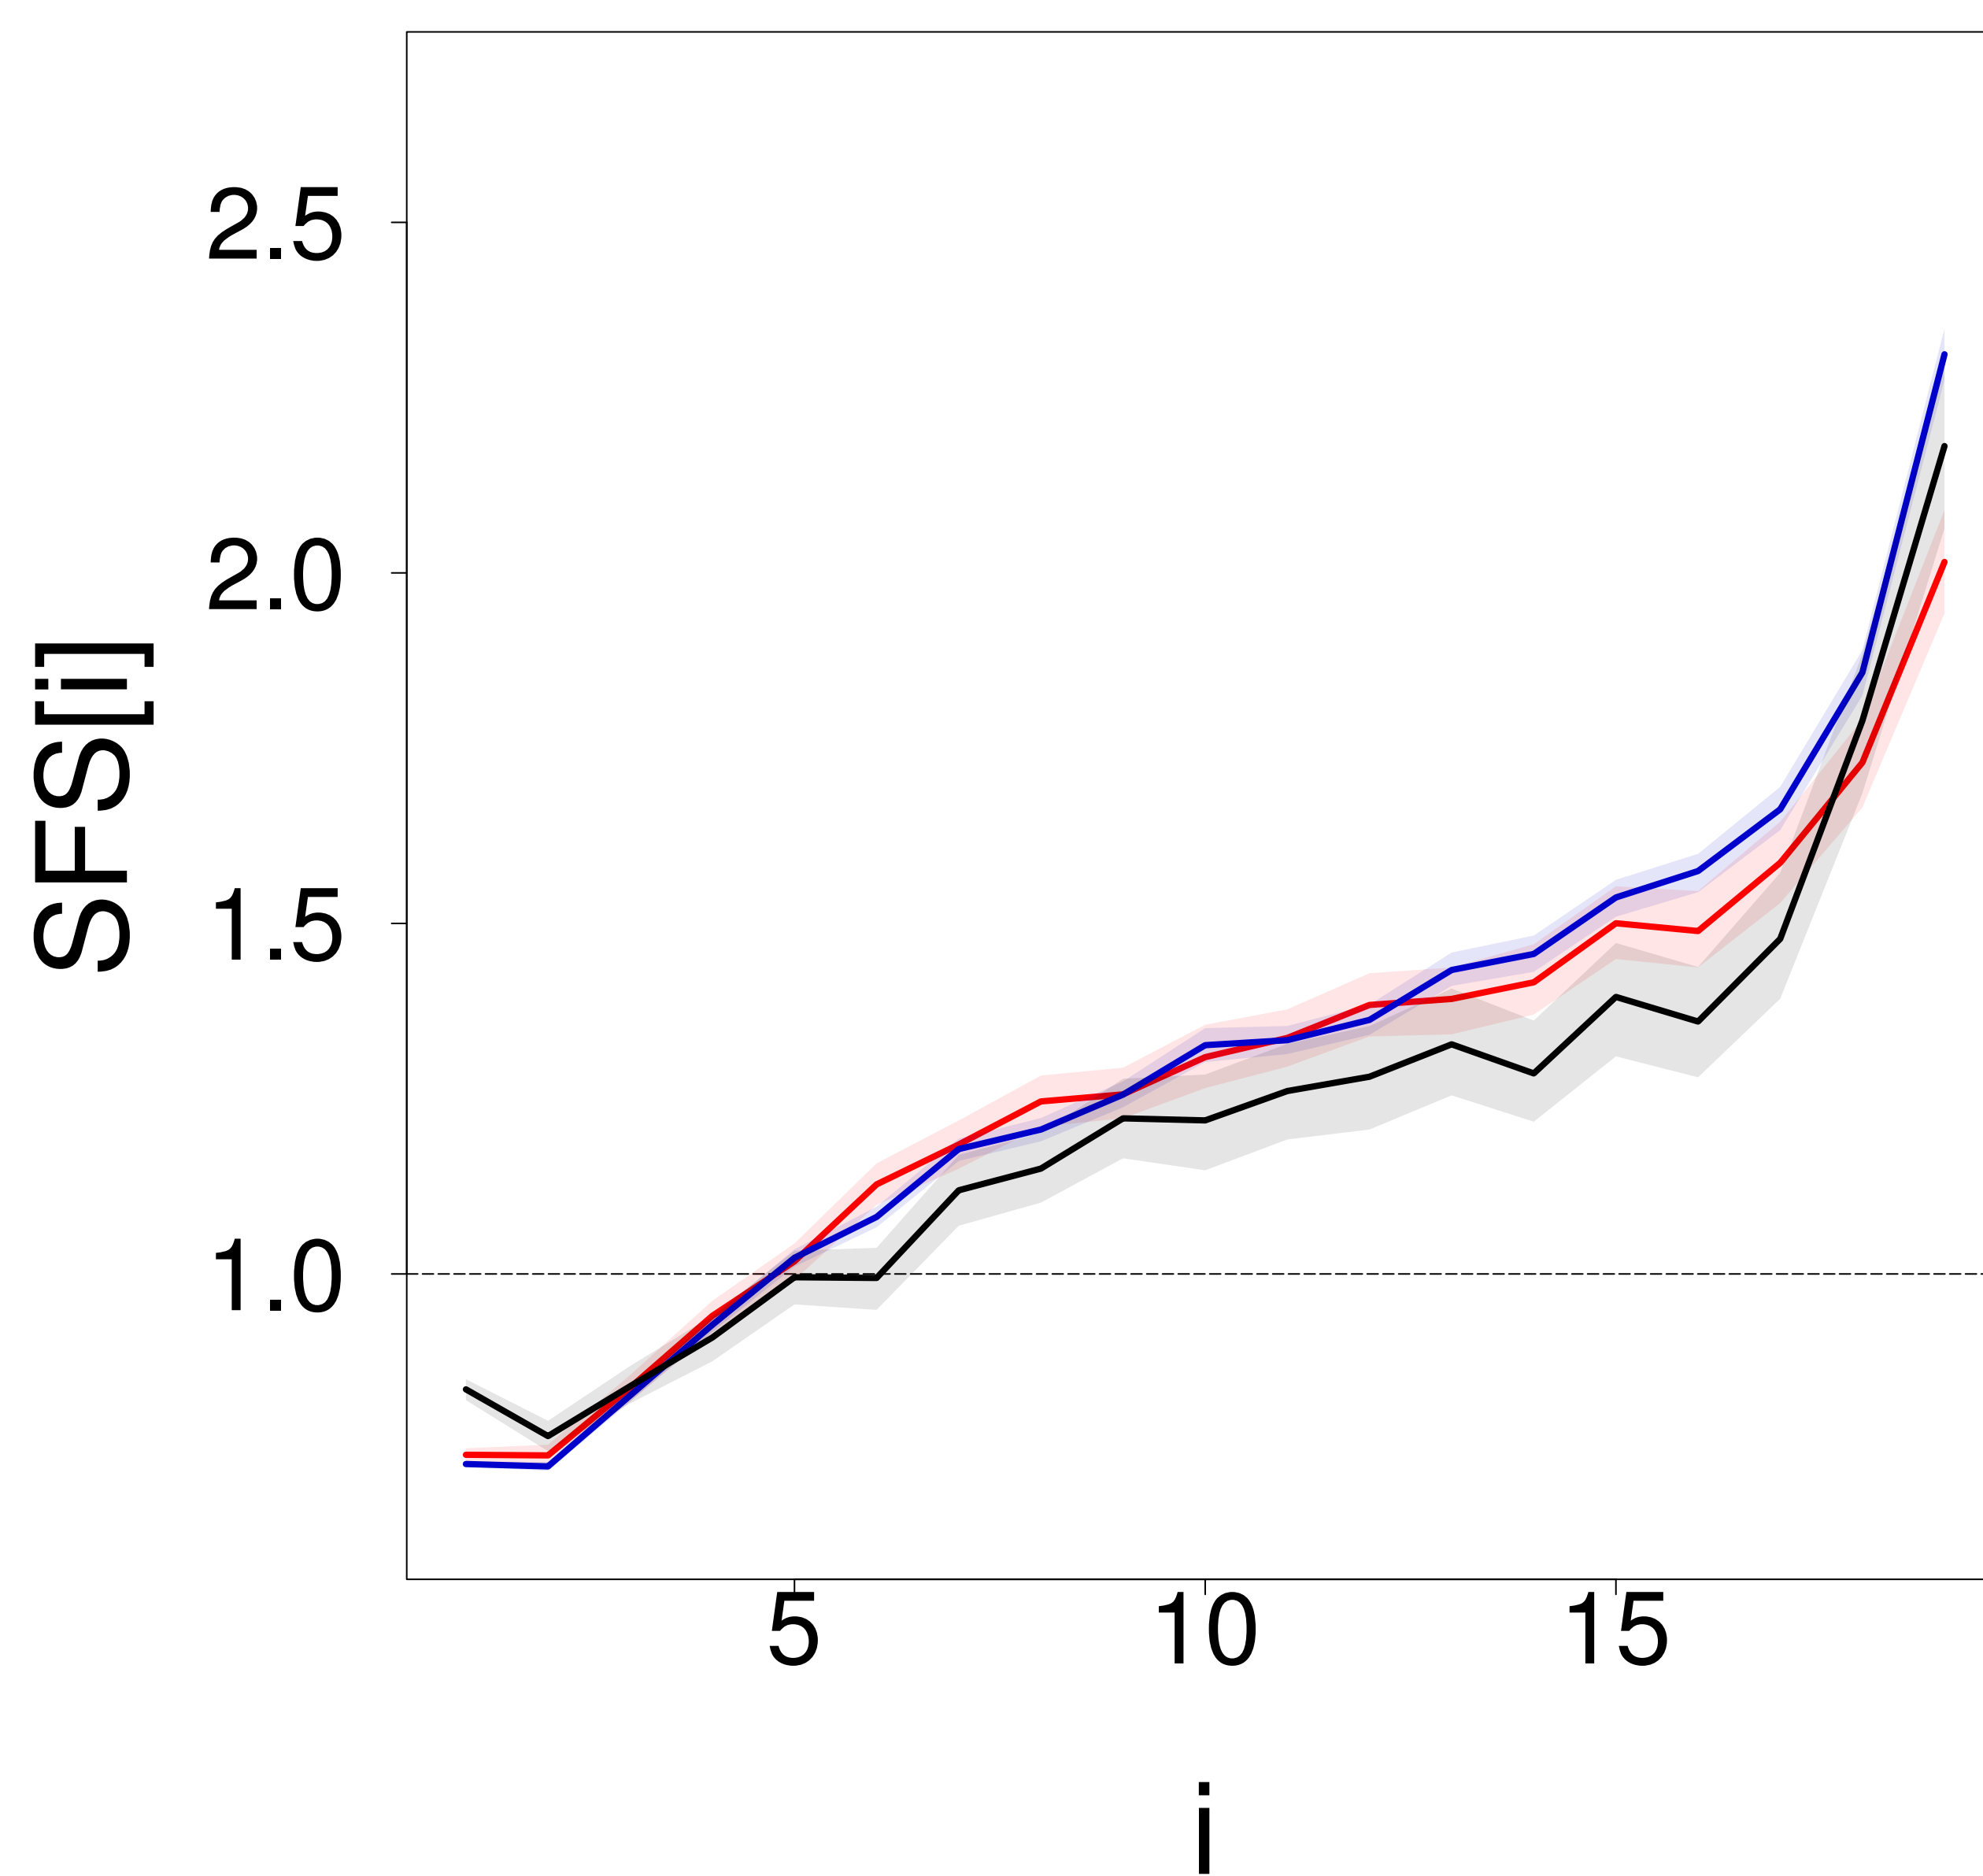**Japan**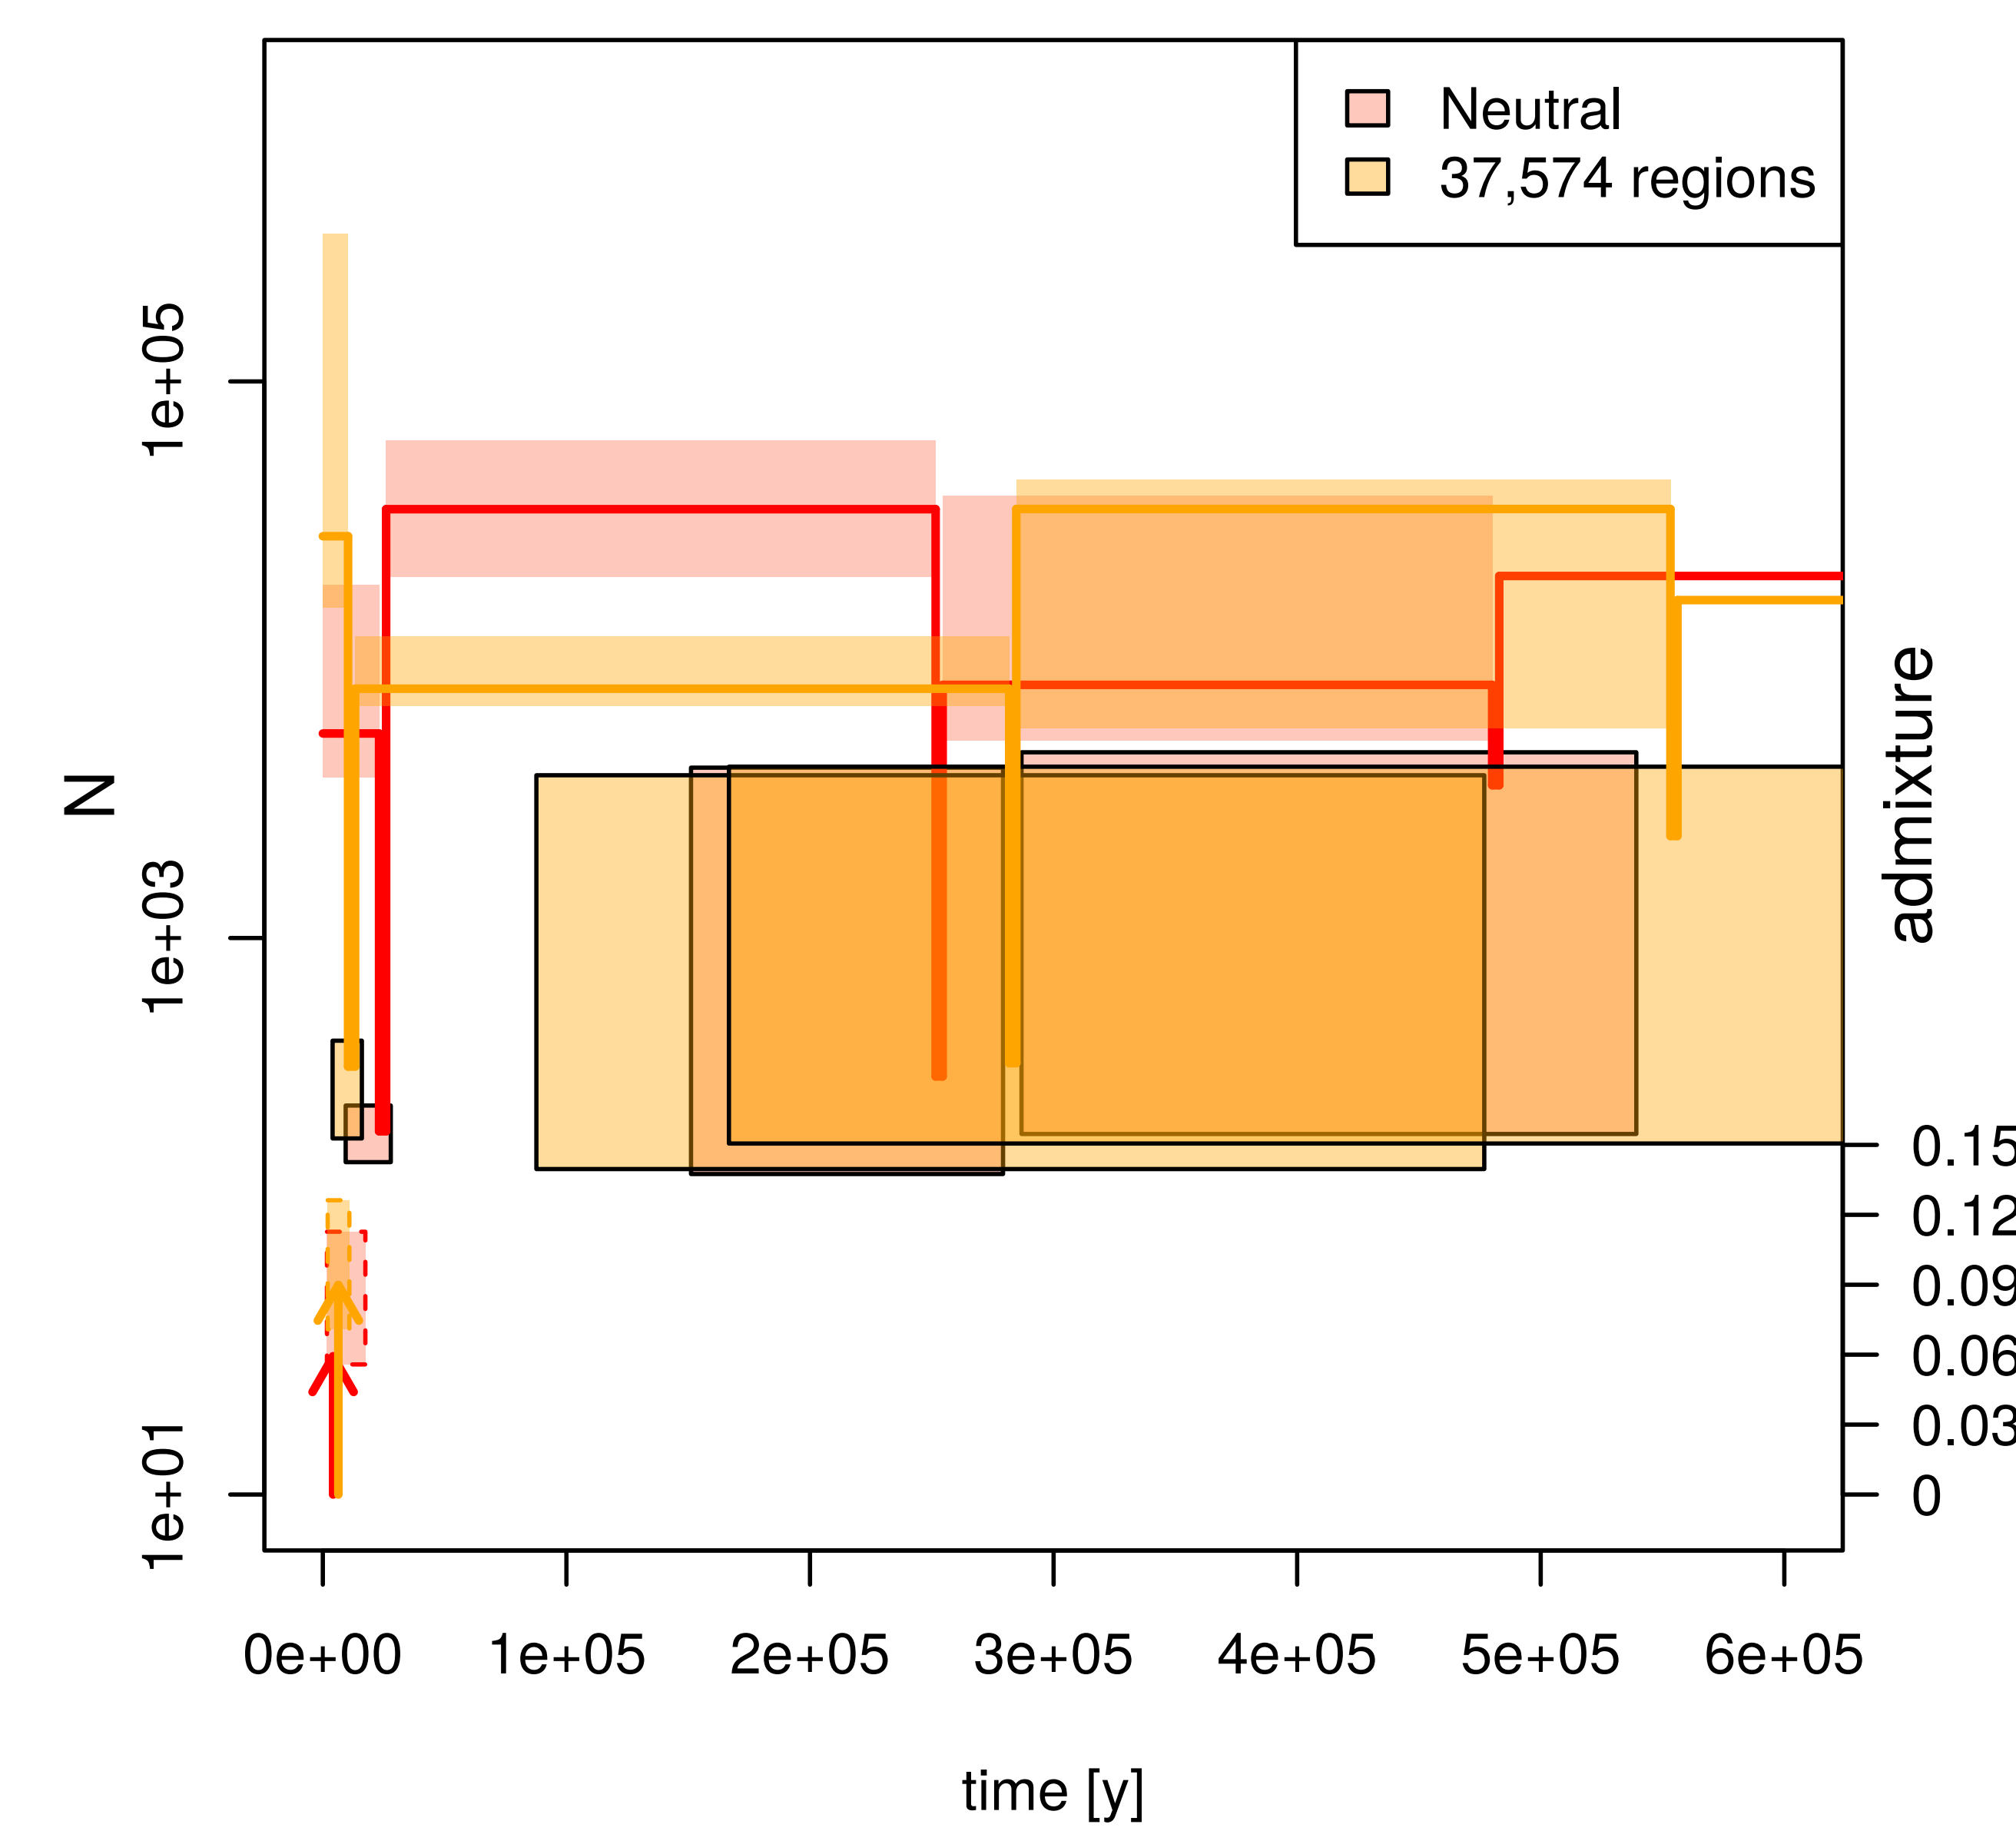**Japan**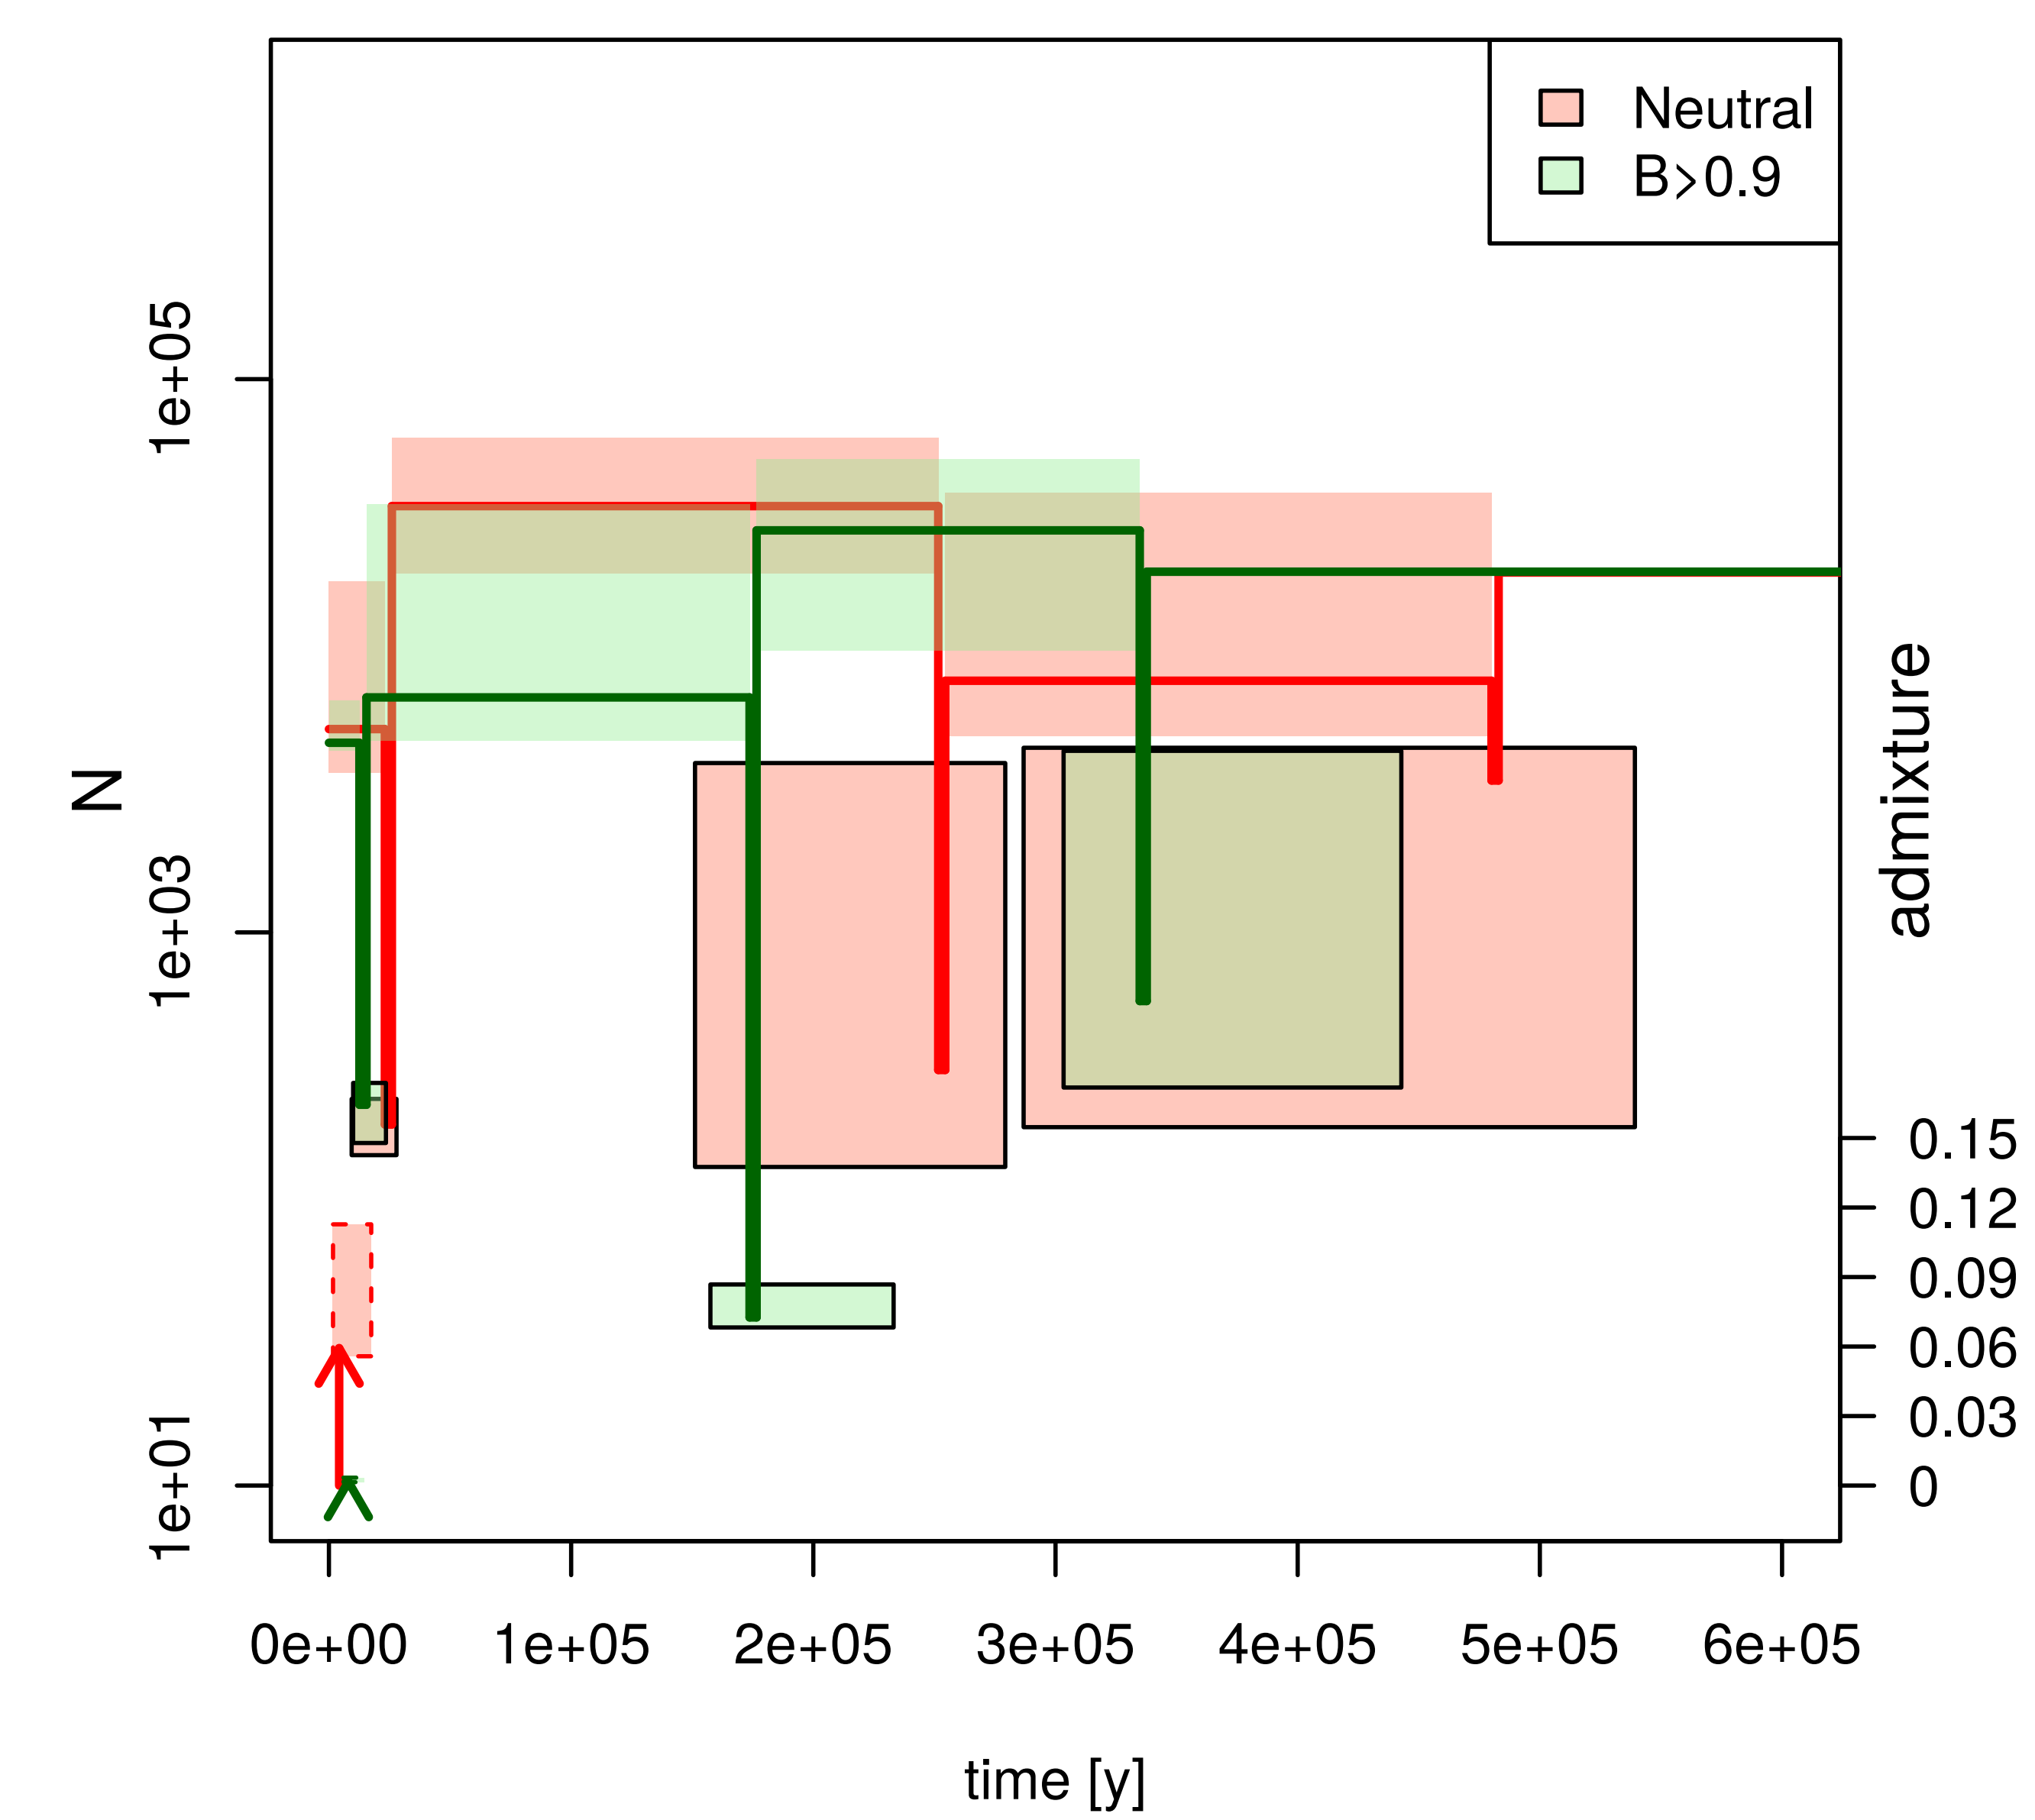

Supplement: supp [file elife-36317-supp-v2.zip]

**A**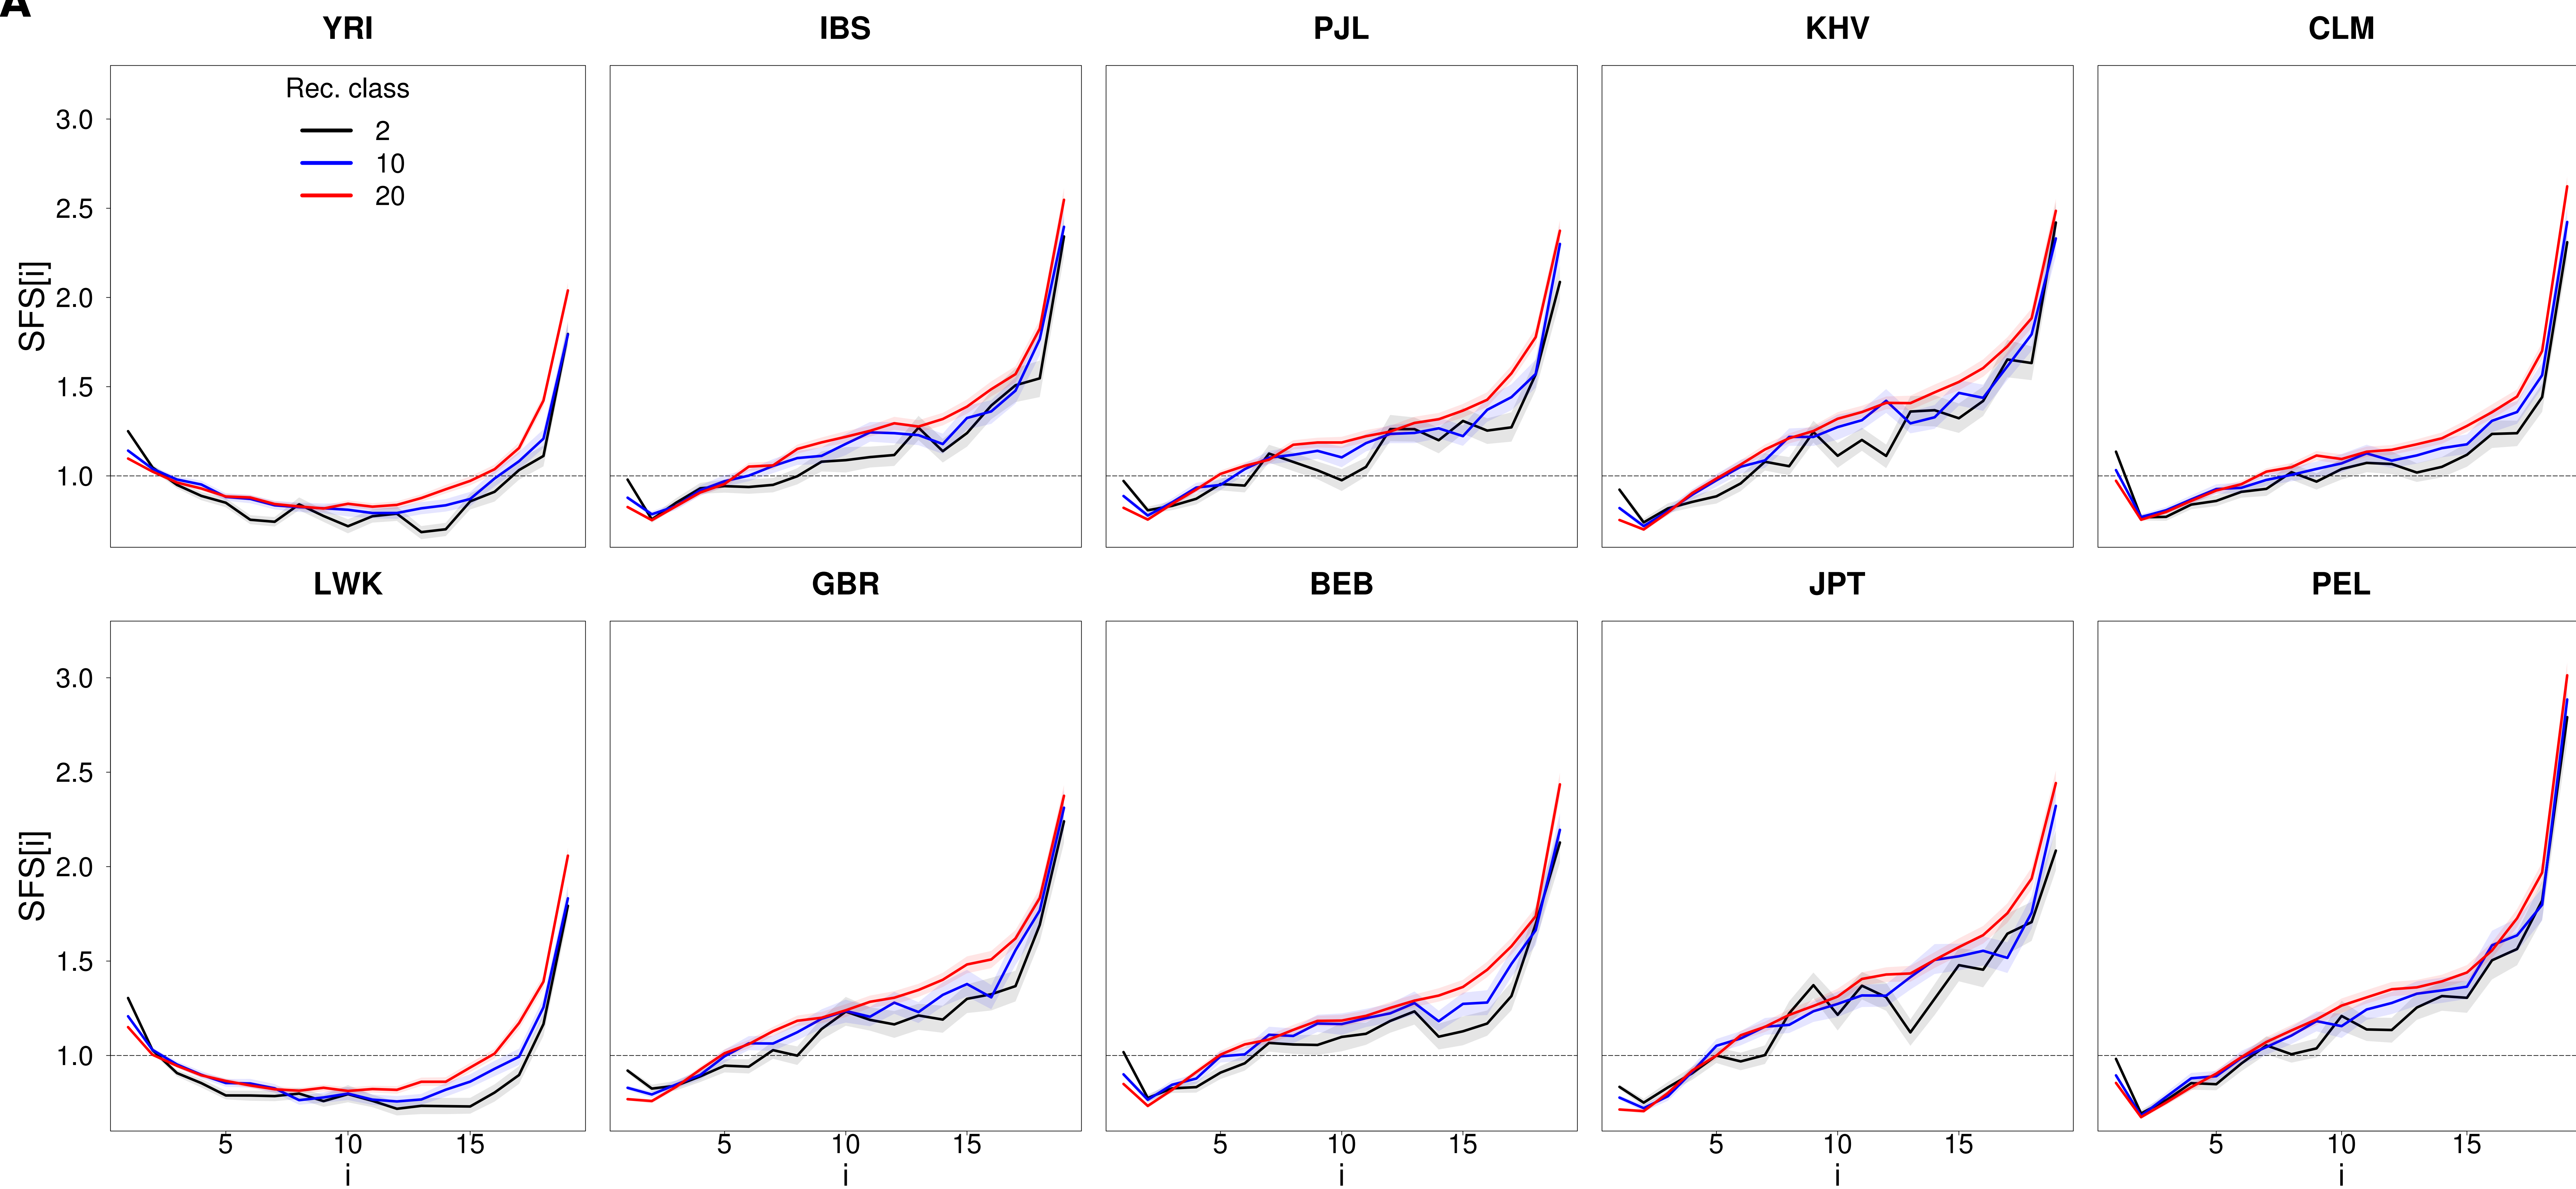**B**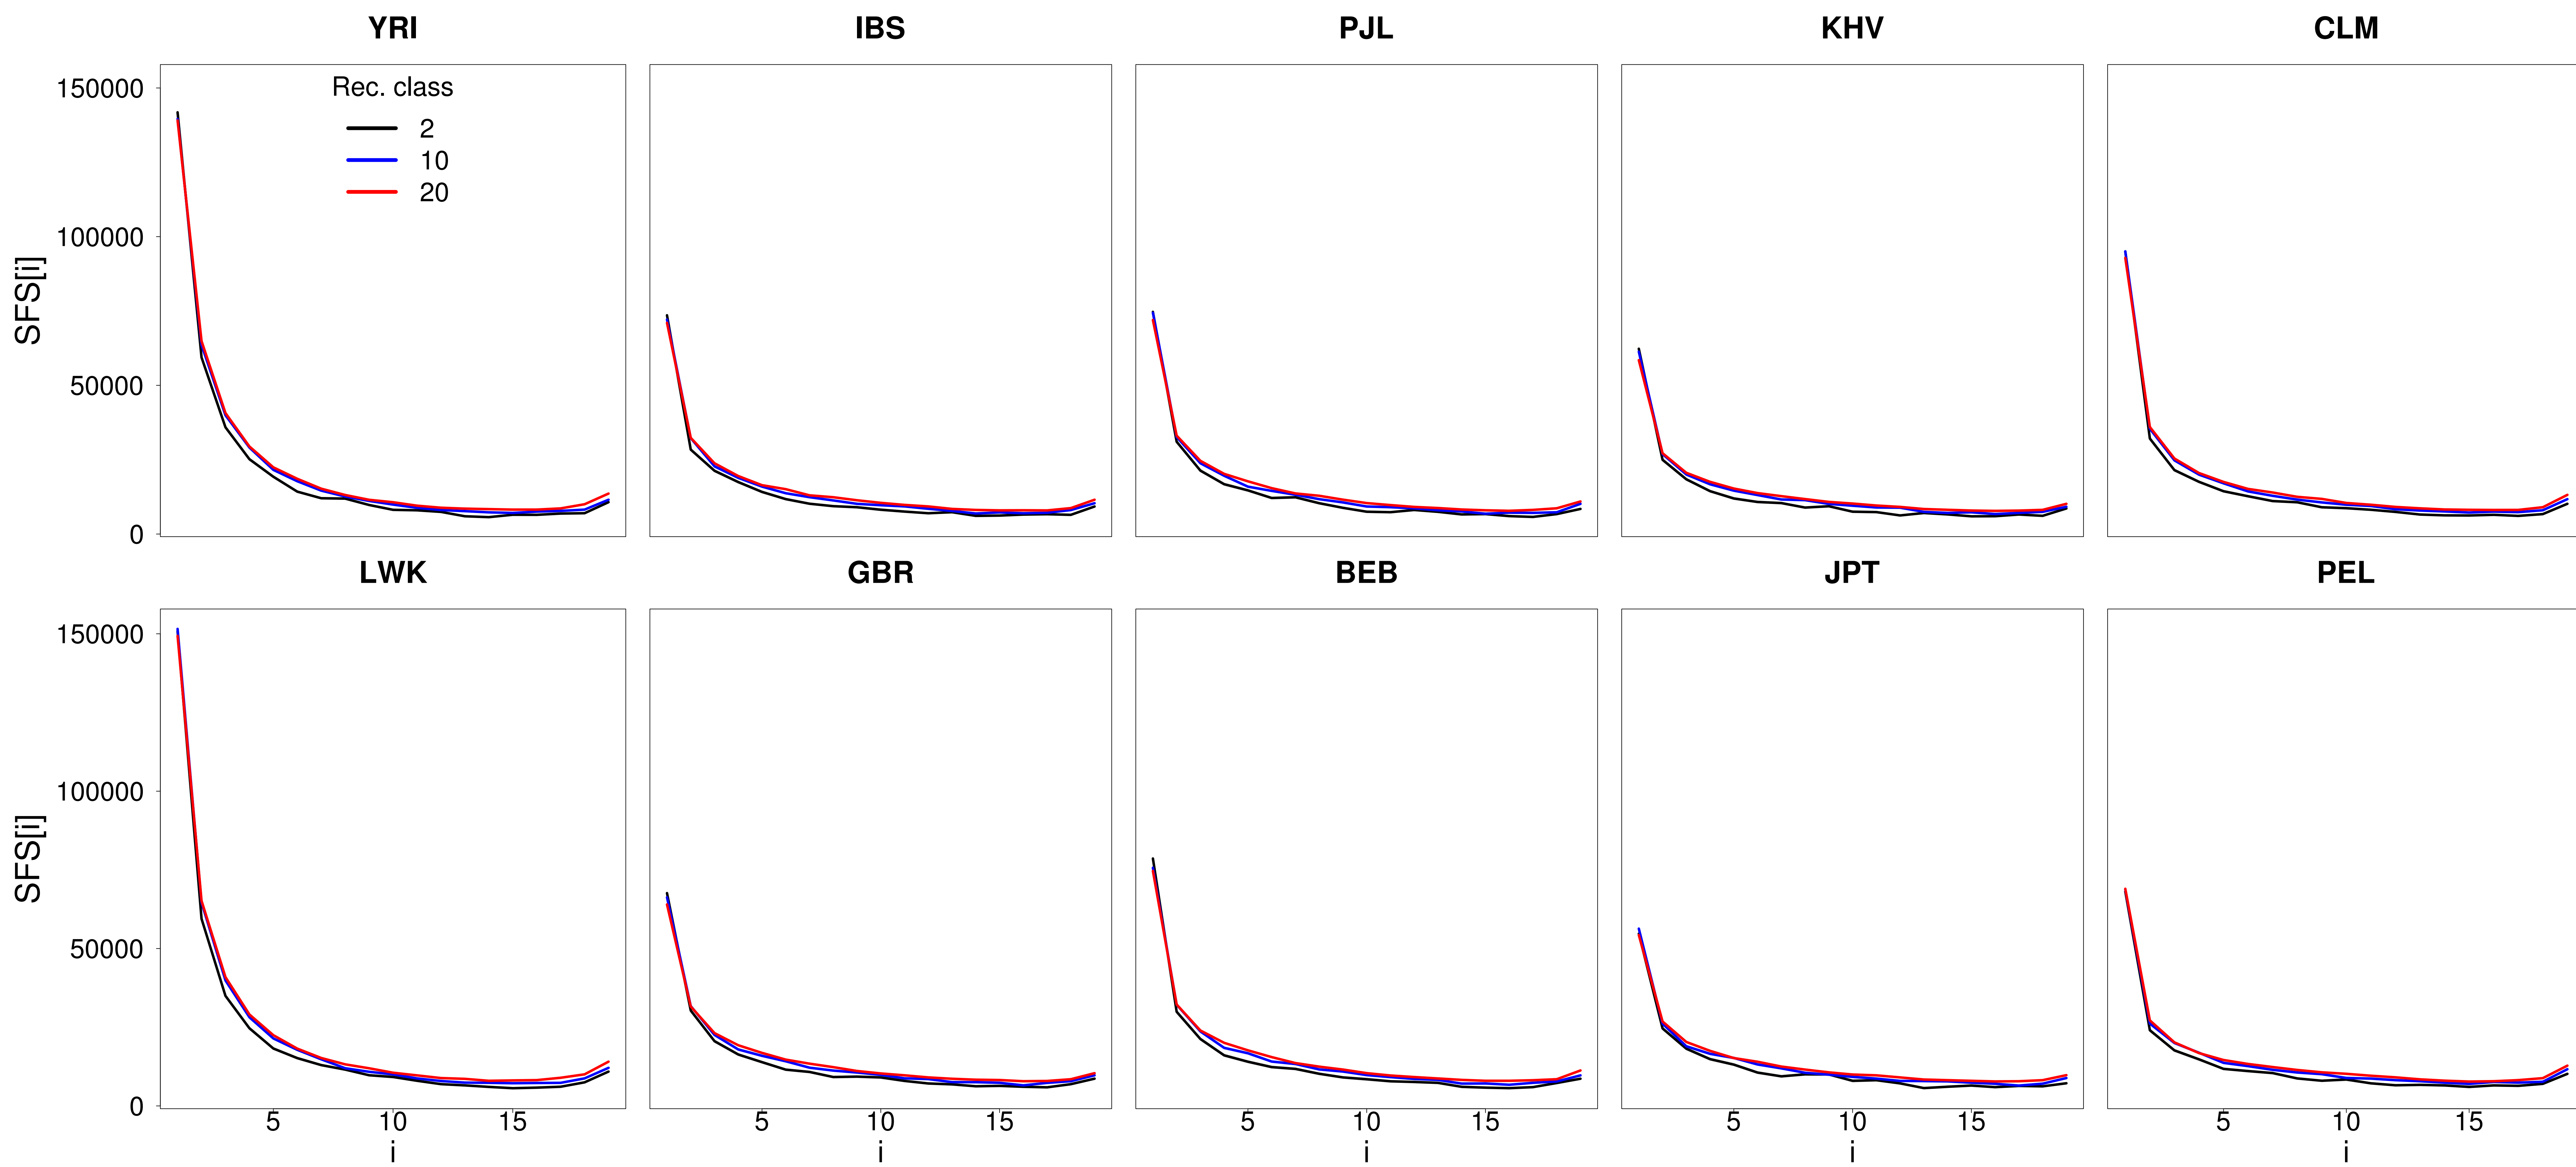

Supplement: supp [file elife-36317-supp-v2.zip]

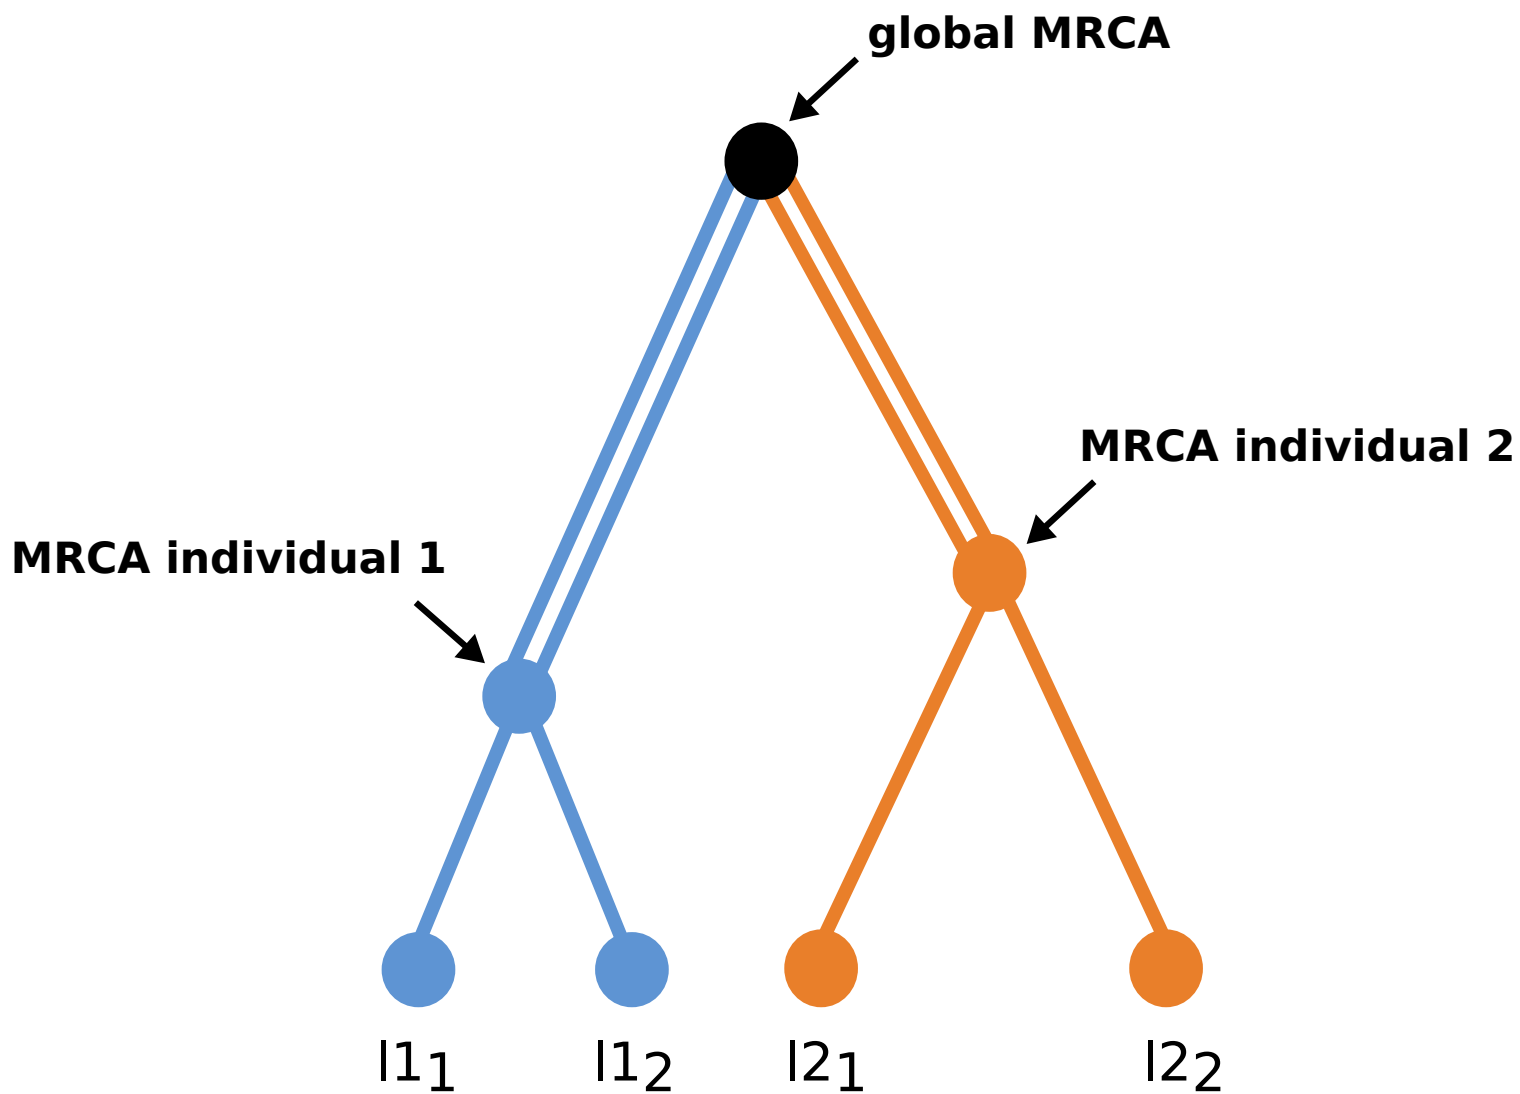

Supplement: supp [file elife-36317-supp-v2.zip]
